# Supplementary material for: Antiviral drug discovery by targeting the SARS-CoV-2 polyprotein processing by inhibition of the main protease
Source: PeerJ. 2022 Feb 8;10:e12929. doi: 10.7717/peerj.12929 (PMC8833224; doi:10.7717/peerj.12929)
Supplement: Supplemental Information 1 [file peerj-10-12929-s001.xlsx]

## Sheet: Table 1
Results of SP docking against SARS CoV-2 Mpro
#	Compound ID	docking score	glide ligand efficiency	glide lipo	glide hbond	glide evdw	glide ecoul
1	F1889-0217	-10.72	-0.346	-3.352	-1.273	-48.293	-12.671
2	F2583-0045	-10.658	-0.355	-3.043	-0.898	-50.781	-13.577
3	F2583-0307	-10.651	-0.367	-2.991	-1.203	-40.744	-17.94
4	F3235-1255	-10.622	-0.379	-3.096	-1.027	-40.868	-17.35
5	F3235-1268	-10.598	-0.378	-3.283	-1.017	-39.768	-16.537
6	F2583-0037	-10.554	-0.377	-3.046	-0.961	-47.097	-12.373
7	F2583-0433	-10.512	-0.35	-2.968	-1.201	-41.239	-17.874
8	F3164-0370	-10.43	-0.36	-2.968	-1.199	-41.3	-16.957
9	F2583-0033	-10.382	-0.371	-2.959	-0.856	-47.941	-12.225
10	F2583-0127	-10.374	-0.335	-2.996	-0.875	-50.784	-12.69
11	F2583-0318	-10.302	-0.355	-2.96	-0.865	-46.876	-12.396
12	F2583-0115	-10.297	-0.355	-2.951	-0.854	-48.343	-12.121
13	F3235-0489	-10.293	-0.368	-3.143	-0.82	-46.635	-10.901
14	F3234-1417	-10.276	-0.381	-3.027	-0.811	-48.119	-10.752
15	F2583-0443	-10.276	-0.343	-2.989	-0.854	-48.218	-12.18
16	F2583-0046	-10.26	-0.342	-3.128	-0.805	-51.267	-10.619
17	F3235-1280	-10.24	-0.366	-3.13	-0.81	-35.372	-18.553
18	F2583-0119	-10.24	-0.353	-3.067	-0.763	-48.102	-11.654
19	F2583-0319	-10.238	-0.353	-2.97	-0.868	-47.179	-11.858
20	F2583-0495	-10.217	-0.33	-2.979	-0.855	-49.334	-12.099
21	F2583-0042	-10.208	-0.365	-2.947	-0.827	-47.099	-12.208
22	F2583-0038	-10.192	-0.364	-3.035	-0.766	-46.461	-11.509
23	F2583-0116	-10.192	-0.351	-2.975	-0.822	-48.279	-11.457
24	F2583-0128	-10.181	-0.328	-3.118	-0.807	-52.011	-10.458
25	F2542-0127	-10.178	-0.391	-3.197	-0.921	-40.283	-11.292
26	F2583-0444	-10.169	-0.339	-2.971	-0.869	-47.185	-11.921
27	F3234-1584	-10.161	-0.363	-3.105	-0.691	-50.344	-10.043
28	F2583-0034	-10.154	-0.363	-2.859	-0.82	-47.902	-11.587
29	F2013-0049	-10.15	-0.362	-2.968	-0.83	-45.799	-11.47
30	F2583-0496	-10.147	-0.327	-2.972	-0.863	-49.278	-11.731
31	F2583-0375	-10.129	-0.338	-2.933	-0.868	-48.034	-11.81
32	F3235-0012	-10.123	-0.349	-2.989	-0.979	-44.317	-15.29
33	F2542-0063	-10.123	-0.405	-3.214	-0.819	-39.979	-11.091
34	F3235-0002	-10.117	-0.349	-2.999	-0.989	-42.807	-15.475
35	F2542-0128	-10.107	-0.374	-3.213	-0.921	-42.44	-11.449
36	F3235-1256	-10.098	-0.361	-3.415	-0.876	-44.572	-10.944
37	F3164-0489	-10.096	-0.316	-3.247	-1.174	-40.735	-14
38	F2583-0123	-10.086	-0.348	-2.946	-0.855	-50.232	-10.108
39	F3124-0055	-10.072	-0.387	-3.663	-0.513	-43.214	-8.396
40	F3234-1575	-10.06	-0.359	-3.216	-0.616	-50.284	-9.144
41	F3235-0529	-10.055	-0.372	-2.964	-0.769	-45.308	-10.915
42	F1191-0059	-10.051	-0.347	-3.129	-1.367	-43.488	-10.799
43	F3164-0037	-10.04	-0.346	-2.943	-0.827	-45.961	-11.85
44	F2542-0943	-10.04	-0.359	-3.537	-0.793	-45.977	-9.456
45	F3164-0488	-10.037	-0.314	-3.656	-0.785	-42.601	-12.395
46	F2542-0251	-10.026	-0.386	-3.153	-0.786	-39.127	-11.255
47	F3164-0560	-10.024	-0.401	-2.705	-0.797	-45.602	-11.308
48	F2583-0120	-10.018	-0.345	-2.931	-0.752	-47.05	-11.466
49	F3164-0600	-10.016	-0.385	-2.634	-0.893	-48.313	-10.673
50	F2542-0132	-10.016	-0.358	-3.175	-0.925	-42.832	-11.405
51	F3234-1332	-10.015	-0.371	-3.022	-0.929	-40.878	-12.431
52	F2013-0680	-10.012	-0.334	-2.976	-0.78	-49.829	-10.832
53	F2583-0124	-10.008	-0.345	-3.009	-0.812	-49.924	-9.538
54	F3124-0164	-10.005	-0.303	-3.48	-0.795	-49.117	-11.363
55	F2013-0524	-9.987	-0.357	-2.871	-0.753	-46.152	-11.532
56	F3234-0376	-9.983	-0.357	-3.076	-0.88	-46.656	-9.867
57	F3234-1534	-9.983	-0.357	-3.011	-0.82	-44.209	-11.219
58	F2583-0041	-9.983	-0.357	-2.994	-0.802	-49.791	-9.052
59	F2542-0293	-9.983	-0.312	-3.282	-0.787	-48.259	-11.529
60	F3124-0065	-9.979	-0.356	-3.724	-0.596	-48.021	-7.466
61	F2542-0354	-9.971	-0.332	-3.184	-0.869	-43.747	-11.665
62	F3124-0056	-9.965	-0.369	-3.642	-0.595	-47.434	-7.417
63	F2013-0056	-9.958	-0.369	-2.834	-0.798	-44.519	-11.207
64	F3024-0018	-9.952	-0.383	-2.824	-0.808	-45.181	-10.451
65	F3234-1375	-9.952	-0.369	-2.723	-0.893	-43.705	-11.544
66	F2542-0134	-9.949	-0.368	-3.208	-0.922	-42.34	-11.394
67	F3235-0704	-9.949	-0.343	-2.895	-0.806	-47.048	-10.954
68	F3234-1333	-9.948	-0.368	-2.751	-0.908	-42.561	-11.67
69	F1873-1644	-9.946	-0.343	-3.927	-0.903	-45.966	-10.984
70	F3124-0417	-9.944	-0.368	-3.697	-0.555	-44.991	-7.514
71	F3124-0018	-9.933	-0.355	-3.173	-0.929	-42.413	-11.109
72	F2542-0262	-9.93	-0.31	-3.316	-0.793	-47.607	-11.159
73	F3234-0818	-9.925	-0.342	-3.033	-0.899	-46.818	-10.06
74	F3164-0423	-9.924	-0.342	-3.59	-0.789	-47.015	-9.311
75	F3164-0097	-9.916	-0.331	-2.984	-0.831	-47.264	-10.522
76	F3235-0293	-9.911	-0.354	-2.861	-0.799	-47.534	-10.328
77	F3124-0057	-9.908	-0.354	-3.916	-0.517	-47.198	-7.522
78	F1892-0579	-9.906	-0.342	-2.815	-0.778	-46.606	-11.935
79	F2542-0221	-9.899	-0.367	-3.233	-0.784	-40.621	-10.933
80	F2013-0710	-9.888	-0.366	-2.914	-0.705	-47.548	-9.774
81	F2583-0180	-9.886	-0.38	-2.626	-0.873	-47.402	-10.292
82	F3124-0150	-9.884	-0.353	-3.484	-0.789	-45.466	-9.213
83	F3124-0418	-9.879	-0.353	-3.614	-0.613	-47.586	-7.67
84	F3234-1543	-9.872	-0.353	-2.91	-0.816	-43.089	-11.502
85	F2542-0264	-9.866	-0.308	-3.277	-0.786	-46.978	-11.256
86	F3124-0102	-9.863	-0.379	-2.988	-0.926	-38.179	-11.286
87	F2542-0220	-9.855	-0.379	-3.313	-0.769	-40.482	-8.835
88	F3124-0149	-9.853	-0.365	-3.408	-0.767	-42.982	-9.141
89	F2542-0295	-9.851	-0.308	-3.234	-0.781	-47.615	-11.461
90	F3235-0371	-9.845	-0.352	-2.668	-0.826	-45.347	-11.681
91	F2542-0359	-9.842	-0.298	-3.185	-0.833	-47.345	-11.809
92	F2542-0031	-9.841	-0.394	-3.269	-0.77	-40.084	-8.796
93	F3024-0007	-9.839	-0.351	-3.133	-0.607	-46.527	-9.539
94	F2542-0285	-9.837	-0.364	-3.123	-0.793	-42.812	-10.774
95	F1191-0058	-9.829	-0.317	-2.946	-0.873	-50.264	-10.83
96	asinex8472	-9.825	-0.317	-2.832	-1.229	-38.989	-11.59
97	F2542-0294	-9.821	-0.307	-3.215	-0.781	-47.987	-11.341
98	F1873-2159	-9.821	-0.317	-3.664	-0.923	-47.511	-8.487
99	F3164-0530	-9.821	-0.446	-2.612	-0.927	-35.707	-11.495
100	F2542-0263	-9.812	-0.307	-3.209	-0.786	-47.036	-11.342
101	F2542-0032	-9.811	-0.377	-3.339	-0.785	-42.057	-8.822
102	F1614-0013	-9.809	-0.307	-2.616	-1.285	-48.392	-12.557
103	F2542-0252	-9.809	-0.363	-3.323	-0.775	-43.513	-9.212
104	asinex3754	-9.808	-0.338	-3.113	-1.276	-37.429	-13.686
105	F3164-0063	-9.808	-0.338	-2.871	-0.793	-45.937	-11.426
106	F2542-0064	-9.804	-0.377	-2.915	-0.922	-41.367	-11.49
107	F3353-0138	-9.803	-0.316	-3.54	-0.926	-43.043	-10.252
108	F2542-0012	-9.803	-0.327	-3.112	-0.791	-45.715	-11.269
109	F3235-0023	-9.8	-0.338	-2.916	-0.787	-40.321	-15.861
110	F2477-0068	-9.795	-0.338	-3.391	-0.806	-44.106	-10.168
111	F2542-0259	-9.795	-0.363	-3.174	-0.786	-40.883	-11.354
112	F2542-0073	-9.795	-0.326	-2.963	-0.923	-45.466	-11.912
113	F3024-0016	-9.793	-0.377	-2.541	-0.872	-42.787	-11.648
114	F1191-0063	-9.793	-0.326	-2.453	-1.256	-41.039	-13.214
115	F3234-1356	-9.792	-0.316	-3.06	-0.926	-43.622	-11.55
116	F2636-0262	-9.792	-0.326	-3.003	-1.261	-42.876	-12.748
117	F3124-0151	-9.785	-0.337	-3.313	-0.792	-44.719	-11.052
118	F3353-0407	-9.783	-0.349	-3.239	-0.78	-41.799	-11.118
119	F2542-0948	-9.78	-0.349	-3.148	-0.92	-42.97	-11.622
120	F2583-0181	-9.779	-0.376	-2.961	-0.676	-46.286	-9.034
121	asinex8485	-9.777	-0.326	-2.686	-1.327	-42.626	-11.625
122	F2013-0014	-9.775	-0.349	-2.941	-0.763	-47.167	-9.211
123	F3234-0278	-9.771	-0.315	-3.122	-0.785	-45.426	-11.618
124	F2542-0349	-9.77	-0.326	-3.176	-0.841	-44.973	-11.158
125	F3353-0406	-9.768	-0.349	-3.228	-0.784	-40.654	-11.381
126	F3124-0371	-9.761	-0.362	-3.291	-0.806	-41.762	-8.747
127	F2542-0316	-9.76	-0.361	-3.214	-0.668	-42.661	-10.148
128	F3235-0030	-9.76	-0.315	-3.07	-0.79	-46.012	-13.515
129	F3124-0103	-9.753	-0.361	-2.964	-0.926	-40.108	-11.449
130	F2542-0284	-9.753	-0.375	-3.178	-0.754	-42.994	-8.847
131	F3124-0117	-9.749	-0.314	-3.027	-0.927	-45.374	-11.866
132	F2583-0207	-9.746	-0.361	-2.723	-0.755	-46.885	-10.101
133	F3234-0275	-9.745	-0.325	-3.09	-0.784	-45.113	-11.543
134	F3124-0178	-9.742	-0.287	-3.337	-0.79	-48.399	-11.868
135	F2542-0355	-9.739	-0.336	-3.161	-0.829	-42.693	-11.36
136	F2542-0314	-9.738	-0.314	-3.225	-0.784	-47.173	-11.512
137	F2542-0942	-9.737	-0.361	-3.154	-0.851	-43.705	-8.595
138	F2542-0013	-9.737	-0.325	-3.05	-0.784	-44.804	-11.603
139	F3124-0419	-9.734	-0.336	-3.874	-0.521	-47.877	-7.079
140	F1191-0072	-9.733	-0.389	-2.259	-1.267	-36.998	-12.276
141	F3124-0159	-9.733	-0.324	-3.377	-0.796	-44.063	-10.775
142	F3235-0363	-9.732	-0.348	-2.727	-0.779	-45.632	-10.761
143	F1614-0043	-9.731	-0.314	-2.438	-1.378	-45.03	-13.273
144	F2542-0362	-9.729	-0.286	-3.138	-0.85	-47.419	-11.861
145	F2542-0038	-9.729	-0.374	-3.191	-0.786	-39.677	-11.004
146	F2636-0335	-9.728	-0.324	-2.702	-1.272	-41.007	-13.21
147	F3164-0571	-9.726	-0.405	-2.969	-0.801	-40.24	-8.49
148	F3124-0067	-9.724	-0.36	-3.643	-0.512	-44.702	-8.243
149	F2542-0283	-9.723	-0.314	-3.269	-0.794	-46.707	-11.156
150	F3124-0187	-9.723	-0.295	-3.444	-0.794	-45.255	-12.228
151	F2542-0347	-9.722	-0.347	-3.08	-0.716	-42.635	-11.259
152	F2542-0070	-9.719	-0.374	-2.976	-0.922	-40.805	-11.467
153	F2000-0684	-9.717	-0.313	-3.002	-0.924	-45.164	-12.005
154	asinex6886	-9.714	-0.304	-3.504	-0.838	-45.421	-8.691
155	F3234-0269	-9.708	-0.373	-2.985	-0.794	-39.943	-11.095
156	F3124-0162	-9.705	-0.285	-3.362	-0.785	-47.245	-11.42
157	F3234-1344	-9.705	-0.388	-2.876	-0.938	-36.118	-10.934
158	F3234-1387	-9.703	-0.373	-3.379	-0.61	-46.332	-7.126
159	F3164-0394	-9.702	-0.313	-2.925	-0.926	-44.46	-11.825
160	F3234-0277	-9.697	-0.313	-3.092	-0.785	-46.01	-11.427
161	F2542-0911	-9.696	-0.359	-3.437	-0.6	-47.011	-7.206
162	F2542-0191	-9.693	-0.359	-3.511	-0.63	-41.571	-8.427
163	F3124-0113	-9.693	-0.334	-3.084	-0.925	-41.845	-11.705
164	F3234-1316	-9.692	-0.313	-2.934	-0.93	-43.93	-11.899
165	F3234-1313	-9.691	-0.323	-2.96	-0.937	-43.716	-12.16
166	F3234-0239	-9.691	-0.373	-2.985	-0.794	-40.357	-10.707
167	F3234-1302	-9.69	-0.388	-2.847	-0.936	-36.362	-11.474
168	F3164-0132	-9.687	-0.334	-2.731	-0.836	-43.657	-11.238
169	F3353-0133	-9.687	-0.312	-3.54	-0.86	-45.01	-8.927
170	F2542-0258	-9.686	-0.334	-3.181	-0.789	-42.254	-11.176
171	F2636-0238	-9.684	-0.323	-2.97	-1.285	-40.381	-12.607
172	F2542-0096	-9.684	-0.372	-3.514	-0.513	-44.368	-7.685
173	F3234-1358	-9.684	-0.312	-3.01	-0.927	-43.582	-11.351
174	F2542-0274	-9.679	-0.302	-3.314	-0.794	-40.816	-12.389
175	F2542-0305	-9.675	-0.302	-3.352	-0.795	-42.057	-11.907
176	F3353-0137	-9.675	-0.312	-3.642	-0.738	-44.945	-9.339
177	F3353-0130	-9.672	-0.302	-3.651	-0.751	-47.454	-8.022
178	F2477-0067	-9.671	-0.333	-3.18	-0.925	-42.203	-10.2
179	F2542-0095	-9.671	-0.387	-3.331	-0.512	-41.289	-8.22
180	F3124-0114	-9.666	-0.358	-3.024	-0.926	-40.469	-11.373
181	F2542-0002	-9.666	-0.387	-3.109	-0.764	-42.078	-8.889
182	F3124-0519	-9.665	-0.312	-3.411	-0.805	-45.119	-10.552
183	F1191-0056	-9.665	-0.322	-2.689	-1.255	-44.712	-12.587
184	F3164-0130	-9.663	-0.333	-3.155	-0.798	-41.669	-13.985
185	F3235-0335	-9.663	-0.333	-2.905	-0.804	-46.357	-10.775
186	F3235-0003	-9.663	-0.333	-3.416	-0.687	-44.191	-10.378
187	F2542-0001	-9.661	-0.403	-3.001	-0.758	-40.021	-8.797
188	F2583-0182	-9.659	-0.358	-2.476	-0.879	-41.662	-12.158
189	F2636-0213	-9.659	-0.333	-2.8	-1.282	-41.132	-12.827
190	F2542-0190	-9.659	-0.371	-3.341	-0.662	-37.661	-8.801
191	F3124-0510	-9.656	-0.333	-3.414	-0.761	-45.68	-9.217
192	F3164-0611	-9.654	-0.345	-3.346	-0.79	-44.832	-8.765
193	F1191-0078	-9.653	-0.386	-2.273	-1.276	-37.592	-12.371
194	F3235-1220	-9.652	-0.311	-3.147	-0.928	-41.369	-13.355
195	F3164-0531	-9.651	-0.42	-2.916	-0.801	-38.176	-8.415
196	F2583-0208	-9.645	-0.357	-2.735	-0.766	-46.108	-9.615
197	F3164-0395	-9.642	-0.301	-3.094	-0.924	-46.121	-11.16
198	F3353-0135	-9.639	-0.301	-3.564	-0.664	-43.907	-10.27
199	F3353-0373	-9.636	-0.357	-2.974	-0.923	-40.903	-11.339
200	F1687-0135	-9.636	-0.321	-3.418	-0.782	-40.766	-11.257
201	asinex667	-9.633	-0.344	-4.113	-0.941	-43.204	-13.091
202	F3235-0203	-9.633	-0.371	-2.719	-0.733	-44	-9.915
203	F2542-0069	-9.632	-0.344	-2.963	-0.921	-41.641	-11.694
204	F2013-0520	-9.626	-0.344	-3.394	-0.719	-43.759	-9.677
205	F3124-0426	-9.622	-0.332	-3.538	-0.6	-49.1	-7.028
206	F3234-1310	-9.622	-0.37	-2.95	-0.937	-39.38	-11.627
207	F0648-0521	-9.621	-0.275	-3.601	-1.242	-56.162	-7.971
208	F3234-1357	-9.619	-0.31	-2.86	-0.926	-43.684	-11.931
209	F3234-1374	-9.618	-0.356	-2.951	-0.903	-42.01	-10.039
210	F3164-0396	-9.617	-0.301	-3.045	-0.929	-46.45	-11.265
211	F3353-0131	-9.616	-0.321	-3.62	-0.736	-45.034	-8.555
212	F2542-0008	-9.615	-0.385	-2.957	-0.784	-39.246	-11.079
213	F3164-0532	-9.615	-0.401	-2.969	-0.796	-41.652	-8.521
214	F3124-0152	-9.612	-0.32	-3.276	-0.794	-44.878	-11.292
215	F2583-0308	-9.61	-0.331	-2.975	-0.926	-43.172	-11.362
216	F2542-1013	-9.608	-0.356	-3.214	-0.764	-40.932	-8.654
217	F2542-0011	-9.602	-0.331	-3.024	-0.794	-43.67	-11.082
218	F1191-0071	-9.602	-0.32	-2.892	-1.229	-45.583	-9.862
219	F3353-0140	-9.601	-0.31	-3.692	-0.728	-46.467	-8.701
220	F2582-0061	-9.6	-0.331	-2.63	-0.791	-44.758	-11.261
221	F3234-1314	-9.599	-0.31	-2.983	-0.925	-42.34	-11.989
222	F2583-0315	-9.598	-0.291	-3.128	-0.928	-43.667	-12.791
223	F2542-0963	-9.598	-0.31	-3.308	-0.809	-49.382	-8.965
224	F3235-1195	-9.598	-0.369	-2.985	-0.8	-39.226	-10.736
225	F3124-0112	-9.596	-0.343	-2.935	-0.927	-40.749	-11.065
226	F3353-0134	-9.595	-0.31	-3.742	-0.772	-46.109	-7.568
227	F2000-0672	-9.594	-0.369	-2.902	-0.921	-39.319	-11.354
228	F3234-1311	-9.593	-0.355	-2.951	-0.936	-40.099	-11.608
229	F3353-0450	-9.59	-0.417	-2.461	-1.149	-33.766	-11.432
230	F2636-0312	-9.589	-0.309	-2.756	-1.327	-42.037	-13.25
231	F3234-1304	-9.589	-0.355	-2.922	-0.939	-40.284	-11.539
232	F3164-0383	-9.587	-0.369	-2.883	-0.897	-41.776	-7.938
233	F2542-0053	-9.585	-0.309	-3.228	-0.794	-41.67	-11.87
234	F3164-0440	-9.585	-0.32	-3.481	-0.759	-46.884	-9.133
235	F2013-0046	-9.581	-0.369	-3.23	-0.658	-41.635	-8.531
236	F3235-1259	-9.581	-0.299	-3.318	-0.801	-45.035	-11.889
237	F3234-1345	-9.58	-0.368	-2.873	-0.938	-38.046	-11.057
238	F3353-0401	-9.58	-0.368	-3.011	-0.783	-39.097	-10.964
239	F3124-0023	-9.575	-0.309	-2.993	-0.926	-43.38	-11.418
240	F2542-1071	-9.575	-0.355	-3.114	-0.734	-43.675	-8.91
241	F3124-0428	-9.575	-0.342	-3.551	-0.605	-47.412	-6.9
242	F3234-1303	-9.573	-0.368	-2.845	-0.935	-38.518	-11.568
243	F2583-0206	-9.571	-0.282	-2.615	-0.922	-51.765	-11.96
244	F1869-0007	-9.57	-0.416	-2.805	-0.751	-39.172	-8.991
245	F3235-1277	-9.568	-0.309	-3.022	-0.856	-43.176	-11.486
246	F2542-0315	-9.567	-0.368	-3.007	-0.681	-39.355	-10.268
247	F2542-0348	-9.565	-0.33	-3.42	-0.601	-49.112	-7.066
248	F3234-0240	-9.564	-0.354	-3.006	-0.793	-42.27	-10.554
249	F3124-0372	-9.561	-0.341	-3.188	-0.828	-43.48	-8.839
250	F3260-0038	-9.561	-0.341	-3.335	-0.835	-43.969	-9.291
251	F3234-1386	-9.56	-0.382	-3.104	-0.613	-43.295	-7.353
252	F3164-0357	-9.558	-0.29	-3.033	-0.923	-47.036	-11.326
253	F3376-0164	-9.557	-0.354	-3.09	-0.845	-42.382	-10.667
254	F2542-1072	-9.556	-0.341	-3.198	-0.738	-45.588	-8.986
255	F3234-0270	-9.555	-0.354	-2.999	-0.794	-41.874	-10.847
256	F3164-0397	-9.555	-0.299	-3.036	-0.927	-45.941	-11.032
257	F2542-0105	-9.552	-0.318	-3.272	-0.62	-46.387	-9.206
258	F2542-0326	-9.545	-0.298	-3.016	-0.829	-44.509	-11.486
259	F2013-0051	-9.545	-0.354	-3.178	-0.794	-40.789	-10.312
260	F3353-0121	-9.541	-0.367	-3.157	-0.729	-41.416	-8.461
261	F3235-0854	-9.54	-0.298	-3.257	-0.772	-44.089	-10.909
262	F1873-0803	-9.537	-0.308	-3.392	-0.937	-45.275	-10.771
263	F2583-0179	-9.537	-0.289	-2.592	-0.903	-50.679	-11.876
264	F3234-1355	-9.537	-0.318	-2.784	-0.926	-42.908	-11.756
265	F3234-1351	-9.536	-0.341	-3.002	-0.928	-39.147	-10.724
266	F2542-0907	-9.535	-0.318	-3.125	-0.786	-45.942	-11.201
267	F3235-0511	-9.535	-0.308	-3.185	-0.781	-44.846	-10.747
268	F2013-0481	-9.532	-0.353	-2.681	-0.84	-44.106	-9.703
269	F3124-0509	-9.528	-0.34	-3.251	-0.754	-43.635	-9.066
270	F3164-0543	-9.526	-0.328	-2.688	-0.925	-40.808	-11.636
271	F3124-0267	-9.524	-0.298	-2.99	-0.793	-45.029	-11.164
272	F1892-0076	-9.523	-0.298	-3.17	-0.695	-45.855	-10.155
273	F2542-0158	-9.523	-0.353	-3.36	-0.645	-40.232	-8.726
274	F3234-0689	-9.519	-0.353	-3.149	-0.758	-43.381	-8.86
275	F3234-0260	-9.514	-0.307	-3.094	-0.794	-42.506	-11.786
276	F3234-0290	-9.507	-0.297	-3.029	-0.793	-45.668	-11.707
277	F3234-1315	-9.506	-0.307	-2.868	-0.935	-43.945	-12.167
278	F2013-0124	-9.506	-0.352	-3.356	-0.652	-41.674	-8.404
279	F2542-1014	-9.504	-0.339	-3.207	-0.74	-43.045	-9.001
280	F2000-0687	-9.504	-0.307	-2.947	-0.922	-44.269	-11.798
281	F3164-0400	-9.503	-0.297	-2.843	-0.929	-44.181	-11.861
282	F2542-0844	-9.5	-0.365	-3.083	-0.746	-40.826	-8.823
283	F2636-0406	-9.496	-0.317	-2.72	-1.257	-43.433	-13.204
284	F2583-0486	-9.496	-0.306	-3.512	-0.501	-47.167	-10.638
285	F3353-0141	-9.495	-0.297	-3.639	-0.802	-45.491	-8.558
286	F3260-0039	-9.491	-0.316	-3.467	-0.835	-43.47	-9.306
287	F3164-0540	-9.488	-0.339	-2.678	-0.925	-39.443	-11.605
288	F3234-1382	-9.486	-0.306	-2.945	-0.928	-44.07	-11.366
289	F2542-0991	-9.483	-0.339	-3.42	-0.627	-42.52	-8.276
290	F2000-0297	-9.483	-0.395	-2.899	-0.773	-40.068	-8.664
291	F2542-0845	-9.481	-0.351	-3.175	-0.755	-42.822	-8.809
292	F3353-0123	-9.48	-0.351	-3.209	-0.923	-36.48	-10.87
293	F3234-1385	-9.479	-0.395	-2.962	-0.632	-42.082	-7.687
294	F3164-0541	-9.477	-0.327	-2.789	-0.787	-43.263	-10.636
295	F3234-1352	-9.477	-0.365	-2.904	-0.939	-37.939	-11.19
296	F3235-0483	-9.476	-0.327	-3.267	-0.794	-41.618	-10.496
297	F3124-0019	-9.476	-0.327	-3.022	-0.921	-39.855	-11.197
298	F3164-0095	-9.475	-0.316	-3.109	-1.032	-43.199	-11.372
299	F2542-1038	-9.474	-0.351	-3.077	-0.738	-42.009	-8.958
300	F3234-1350	-9.472	-0.351	-2.758	-0.924	-38.947	-10.801
301	F2542-0566	-9.47	-0.296	-3.302	-0.929	-42.921	-12.22
302	F3124-0010	-9.468	-0.338	-2.959	-0.926	-40.122	-10.959
303	F2542-1039	-9.467	-0.338	-3.158	-0.753	-44.072	-9.087
304	F3124-1271	-9.467	-0.326	-2.764	-0.765	-41.681	-10.83
305	F3353-0120	-9.467	-0.379	-3.028	-0.755	-39.031	-9.031
306	F2542-0966	-9.465	-0.338	-3.37	-0.634	-41.337	-8.677
307	F1889-0003	-9.462	-0.27	-3.473	-0.714	-46.081	-10.957
308	F3234-1520	-9.462	-0.296	-3.287	-0.826	-43.554	-10.019
309	F3124-0020	-9.461	-0.35	-3.005	-0.916	-38.357	-10.881
310	F3234-1346	-9.459	-0.35	-2.892	-0.937	-39.68	-11.03
311	F3235-0013	-9.458	-0.326	-3.298	-0.531	-45.254	-10.517
312	F2000-0706	-9.458	-0.35	-2.923	-0.92	-40.76	-11.281
313	F3234-1546	-9.455	-0.364	-3.434	-0.477	-44.924	-6.293
314	F3235-1438	-9.455	-0.287	-3.201	-0.919	-42.938	-12.391
315	F3164-0358	-9.455	-0.287	-2.966	-0.923	-47.547	-11.073
316	F3353-0142	-9.453	-0.295	-3.657	-0.728	-47.222	-9.239
317	F2583-0434	-9.453	-0.315	-3.018	-0.868	-45.656	-10.091
318	F3235-0457	-9.451	-0.378	-3.143	-0.657	-39.552	-8.388
319	F3124-0141	-9.451	-0.295	-3.112	-0.93	-40.673	-13.352
320	F2542-0085	-9.45	-0.305	-3.028	-0.921	-39.912	-12.094
321	F3353-0139	-9.45	-0.305	-3.562	-0.715	-45.849	-9.283
322	asinex267	-9.449	-0.305	-4.371	-0.868	-50.069	-10.035
323	F3234-0719	-9.448	-0.35	-3.099	-0.754	-42.838	-9.151
324	F2013-0048	-9.444	-0.337	-3.133	-0.764	-43.864	-8.897
325	F2542-0683	-9.441	-0.393	-2.909	-0.772	-36.862	-8.642
326	F3124-0070	-9.441	-0.305	-3.026	-0.804	-40.861	-11.375
327	F3164-0270	-9.44	-0.35	-2.963	-0.921	-40.901	-10.578
328	F2542-0910	-9.438	-0.363	-3.248	-0.617	-44.716	-6.282
329	F3164-0413	-9.438	-0.337	-3.001	-0.937	-42.366	-10.581
330	F1873-2214	-9.437	-0.286	-3.525	-0.905	-49.093	-9.876
331	F3124-0104	-9.435	-0.337	-2.955	-0.93	-40.082	-11.009
332	asinex8476	-9.434	-0.295	-2.903	-1.287	-43.789	-10.508
333	F3235-1272	-9.434	-0.295	-3.026	-0.922	-43.049	-12.227
334	F3260-0773	-9.433	-0.314	-3.429	-0.934	-42.263	-10.702
335	F3234-1397	-9.432	-0.314	-3.15	-0.686	-47.101	-8.922
336	F3164-0371	-9.43	-0.325	-2.959	-0.925	-43.671	-10.67
337	F3235-1289	-9.428	-0.314	-3.441	-0.537	-47.672	-8.655
338	asinex594	-9.427	-0.337	-3.579	-0.665	-50.237	-10.742
339	F3164-0347	-9.426	-0.325	-2.928	-0.923	-43.774	-10.807
340	F3164-0548	-9.424	-0.325	-2.674	-0.926	-41.658	-11.55
341	F3164-0547	-9.424	-0.325	-2.819	-0.784	-43.951	-10.533
342	F3124-0066	-9.422	-0.325	-3.47	-0.539	-46.348	-7.774
343	F3124-0472	-9.42	-0.325	-2.875	-0.911	-41.246	-10.986
344	F3124-0380	-9.419	-0.325	-3.07	-0.866	-45.683	-8.438
345	F3234-0261	-9.419	-0.294	-3.014	-0.794	-45.764	-11.179
346	F3124-0373	-9.415	-0.325	-3.209	-0.822	-45.196	-8.58
347	F3234-0532	-9.415	-0.285	-2.525	-0.812	-48.957	-14.964
348	F2542-1100	-9.414	-0.349	-3.019	-0.666	-40.133	-9.689
349	F3164-0572	-9.413	-0.377	-2.992	-0.724	-41.097	-8.194
350	F3234-1399	-9.413	-0.304	-3.101	-0.691	-46.889	-9.58
351	F3124-0534	-9.413	-0.277	-3.344	-0.794	-43.046	-12.187
352	F3289-1205	-9.411	-0.314	-2.786	-0.778	-42.166	-11.163
353	asinex8433	-9.41	-0.304	-3.24	-1.128	-41.632	-13.401
354	F3234-1396	-9.41	-0.349	-3.173	-0.663	-43.648	-8.505
355	F2636-0509	-9.41	-0.269	-4.206	-0.678	-44.783	-9.315
356	F3235-0471	-9.409	-0.294	-3.153	-0.789	-46.258	-10.063
357	F3353-0122	-9.408	-0.362	-3.201	-0.787	-39.374	-8.35
358	F2583-0316	-9.408	-0.303	-2.936	-0.922	-43.505	-11.643
359	F3124-0463	-9.407	-0.348	-2.942	-0.844	-41.907	-8.612
360	F2542-0102	-9.406	-0.362	-3.258	-0.589	-41.753	-8.683
361	F3124-0382	-9.406	-0.336	-3.133	-0.851	-44.566	-8.451
362	F1892-0311	-9.405	-0.269	-3.078	-0.788	-51.393	-11.421
363	F3406-6584	-9.404	-0.294	-3.248	-1.14	-51.593	-10.041
364	F3235-0011	-9.404	-0.285	-3.104	-0.798	-44.787	-11.893
365	F3234-1505	-9.401	-0.362	-3.118	-0.693	-39.634	-8.671
366	F3234-1388	-9.4	-0.348	-3.119	-0.688	-43.857	-8.853
367	F3124-0512	-9.398	-0.303	-3.301	-0.79	-44.027	-11.02
368	F2636-0287	-9.398	-0.313	-2.617	-1.171	-41.839	-12.744
369	F3234-1308	-9.396	-0.348	-2.839	-0.925	-39.29	-10.636
370	F3234-0266	-9.395	-0.336	-2.987	-0.794	-42.581	-10.783
371	F3164-0567	-9.392	-0.324	-2.694	-0.925	-42.395	-10.881
372	F2542-0851	-9.392	-0.348	-3.417	-0.613	-44.901	-6.923
373	asinex7002	-9.391	-0.303	-2.527	-1.237	-42.459	-13.295
374	F3124-0008	-9.391	-0.361	-2.955	-0.733	-39.42	-8.961
375	F3235-0706	-9.387	-0.324	-3.412	-0.594	-46.824	-8.49
376	F3164-0107	-9.386	-0.348	-3.1	-0.662	-41.573	-8.556
377	F1717-0026	-9.386	-0.284	-3.872	-0.879	-43.792	-12.362
378	F2583-0374	-9.385	-0.313	-2.71	-0.907	-45.922	-11.081
379	F3260-0040	-9.384	-0.324	-3.523	-0.837	-44.432	-9.12
380	F3234-1301	-9.383	-0.391	-2.903	-0.807	-37.193	-8.63
381	F2542-0014	-9.382	-0.313	-2.768	-0.915	-43.198	-11.318
382	F3164-0539	-9.381	-0.375	-2.634	-0.927	-36.341	-11.218
383	F3234-1353	-9.381	-0.347	-2.77	-0.93	-38.858	-11.366
384	F3353-0145	-9.38	-0.303	-3.701	-0.727	-47.054	-8.521
385	F2542-0814	-9.379	-0.375	-2.917	-0.739	-40.449	-8.756
386	F3234-1547	-9.378	-0.347	-3.513	-0.451	-47.206	-6.222
387	F1873-1646	-9.377	-0.323	-4.052	-0.713	-47.192	-7.347
388	F3164-0096	-9.376	-0.313	-3.286	-0.758	-46.517	-9.423
389	F3164-0346	-9.375	-0.335	-2.919	-0.903	-40.931	-10.315
390	F3234-1545	-9.375	-0.375	-3.382	-0.476	-41.231	-6.47
391	F2542-1139	-9.374	-0.302	-2.946	-0.893	-40.756	-11.722
392	F3289-1152	-9.374	-0.284	-3.29	-0.817	-45.76	-10.744
393	F2636-0587	-9.374	-0.284	-3.86	-0.912	-40.618	-9.71
394	F3234-1395	-9.373	-0.347	-3.273	-0.574	-47.645	-7.331
395	F3235-0326	-9.371	-0.323	-2.928	-0.73	-46.654	-8.987
396	F3164-0408	-9.366	-0.293	-2.954	-0.923	-41.05	-11.622
397	F3235-0377	-9.365	-0.36	-3.347	-0.515	-40.809	-7.056
398	F2013-0101	-9.362	-0.323	-3.079	-0.778	-41.34	-9.771
399	F3234-1309	-9.361	-0.334	-2.915	-0.907	-40.745	-10.214
400	F2583-0729	-9.359	-0.407	-2.848	-0.762	-37.969	-8.461
401	F2542-1141	-9.358	-0.312	-3.188	-0.652	-47.176	-8.958
402	F3234-1380	-9.358	-0.302	-3.039	-0.936	-38.988	-12.892
403	F2013-0720	-9.356	-0.284	-3.349	-0.695	-46.346	-9.958
404	F3235-0289	-9.355	-0.334	-2.926	-0.705	-39.651	-13.311
405	F2542-0877	-9.354	-0.36	-2.879	-0.782	-40.169	-9.368
406	F3234-1506	-9.354	-0.346	-3.446	-0.609	-42.535	-7.714
407	F3234-1509	-9.354	-0.334	-3.148	-0.802	-39.002	-10.102
408	Asunaprevir	-9.352	-0.183	-4.329	-0.518	-61.119	-6.134
409	F3353-0126	-9.351	-0.334	-3.449	-0.748	-43.608	-8.892
410	F3407-0805	-9.348	-0.24	-3.208	-1.495	-45.847	-13.851
411	F3164-0359	-9.348	-0.283	-2.99	-0.908	-45.994	-10.847
412	F3234-1354	-9.347	-0.346	-2.767	-0.931	-38.642	-11.109
413	F3164-0356	-9.344	-0.292	-2.958	-0.904	-45.578	-10.893
414	F3164-0131	-9.344	-0.322	-3.324	-0.703	-44.571	-9.521
415	F2542-0037	-9.343	-0.334	-3.112	-0.788	-42.762	-9.019
416	F3024-0019	-9.343	-0.346	-2.669	-0.781	-46.034	-8.137
417	F3234-1517	-9.342	-0.292	-3.178	-0.842	-44.172	-9.713
418	asinex7075	-9.341	-0.292	-2.93	-0.88	-50.649	-10.645
419	F3234-1550	-9.341	-0.334	-3.523	-0.424	-48.777	-6.071
420	F2013-0054	-9.339	-0.283	-3.332	-0.785	-45.959	-10.105
421	F2542-1101	-9.338	-0.334	-3.155	-0.64	-44.052	-8.774
422	F2542-0370	-9.338	-0.275	-3.156	-0.869	-39.427	-12.797
423	F2542-0097	-9.333	-0.346	-3.137	-0.643	-44.861	-8.36
424	F3164-0570	-9.333	-0.406	-2.676	-0.727	-38.17	-9.086
425	F3235-0451	-9.333	-0.333	-2.656	-0.794	-44.401	-10.734
426	F3407-3983	-9.332	-0.217	-4.335	-0.44	-56.139	-7.611
427	F3164-0544	-9.33	-0.311	-2.79	-0.794	-44.758	-9.911
428	F0570-0371	-9.33	-0.322	-3.134	-0.837	-45.053	-9.95
429	F1289-0025	-9.33	-0.311	-3.233	-0.796	-40.696	-9.874
430	F3234-1347	-9.327	-0.333	-2.892	-0.936	-40.376	-11.173
431	F3124-0385	-9.327	-0.291	-3.073	-0.842	-49.431	-8.74
432	asinex8350	-9.325	-0.311	-3.183	-0.605	-49.503	-7.617
433	F2542-0878	-9.324	-0.345	-2.996	-0.784	-42.228	-9.101
434	pigallocatechin ga	-9.324	-0.283	-2.906	-0.645	-41.473	-24.04
435	F2583-0440	-9.323	-0.274	-3.048	-0.928	-44.035	-12.377
436	F3164-0535	-9.323	-0.373	-2.677	-0.802	-39.728	-9.49
437	F2542-0912	-9.321	-0.333	-3.552	-0.508	-45.712	-7.224
438	F2542-0815	-9.32	-0.358	-2.996	-0.745	-42.412	-8.74
439	F3234-1343	-9.318	-0.388	-2.701	-0.877	-37.379	-8.078
440	F3124-1270	-9.317	-0.345	-2.712	-0.711	-40.847	-9.669
441	F3260-0041	-9.316	-0.345	-3.484	-0.804	-42.348	-8.744
442	F1614-0233	-9.315	-0.259	-3.56	-0.696	-47.859	-10.527
443	F3234-1416	-9.313	-0.345	-3.113	-0.684	-43.503	-8.518
444	F3234-1312	-9.312	-0.345	-2.834	-0.932	-39.204	-11.219
445	F3235-0001	-9.312	-0.282	-3.073	-0.794	-43.508	-12.113
446	F3382-5851	-9.312	-0.291	-3.975	-0.84	-51.929	-9.962
447	F3234-1341	-9.311	-0.333	-2.862	-0.938	-39.918	-11.799
448	F0570-0336	-9.307	-0.321	-3.16	-0.807	-47.038	-7.835
449	F2583-0317	-9.305	-0.291	-2.956	-0.921	-44.776	-11.676
450	F2000-0539	-9.303	-0.358	-2.698	-0.918	-38.236	-11.451
451	F3235-1258	-9.302	-0.291	-3.147	-0.786	-40.979	-12.213
452	F3234-1400	-9.301	-0.3	-2.908	-0.695	-46.513	-9.396
453	F3235-1248	-9.299	-0.291	-3.189	-0.792	-39.657	-12.34
454	F2542-0327	-9.292	-0.29	-2.922	-0.856	-41.63	-11.394
455	F3235-0825	-9.291	-0.282	-3.431	-0.795	-41.277	-11.459
456	F3353-0125	-9.291	-0.332	-3.247	-0.747	-41.684	-8.886
457	F1873-0485	-9.287	-0.29	-3.516	-0.718	-43.687	-9.608
458	F2542-1077	-9.287	-0.31	-3.231	-0.802	-43.601	-8.749
459	F3235-1213	-9.286	-0.3	-3.151	-0.786	-39.638	-12.166
460	F3289-1211	-9.286	-0.29	-3.128	-0.795	-45.296	-10.107
461	F2542-0125	-9.285	-0.32	-3.247	-0.563	-46.867	-8.121
462	F3235-1049	-9.285	-0.357	-2.469	-0.728	-42.053	-10.366
463	F3124-0972	-9.283	-0.332	-3.174	-0.905	-42.164	-7.517
464	F3164-0575	-9.282	-0.357	-2.962	-0.726	-42.653	-7.634
465	F3164-0542	-9.281	-0.32	-2.841	-0.786	-40.276	-11.302
466	F1889-0360	-9.279	-0.29	-3.855	-0.667	-44.553	-9.02
467	F2542-0162	-9.279	-0.331	-2.972	-0.887	-35.814	-10.964
468	F3234-1371	-9.279	-0.29	-2.884	-0.936	-42.458	-11.008
469	F3164-0381	-9.277	-0.387	-2.675	-0.915	-34.899	-10.702
470	F3234-1553	-9.276	-0.331	-3.644	-0.356	-49.811	-5.79
471	F3260-0171	-9.274	-0.343	-2.531	-0.928	-40.305	-11.252
472	F3164-0581	-9.265	-0.309	-2.814	-0.785	-46.472	-9.216
473	F3164-0117	-9.264	-0.281	-3.032	-0.769	-45.885	-10.754
474	F2013-0703	-9.262	-0.289	-3.276	-0.668	-45.543	-9.41
475	F3234-1548	-9.26	-0.331	-3.615	-0.452	-49.044	-5.567
476	F0648-0526	-9.258	-0.265	-3.541	-1.157	-59.914	-8.392
477	F3235-0837	-9.258	-0.356	-3.129	-0.642	-40.005	-8.438
478	F3164-0554	-9.257	-0.319	-2.64	-0.925	-37.712	-11.845
479	F0648-0620	-9.256	-0.244	-3.227	-1.286	-55.582	-8.78
480	F2013-0898	-9.253	-0.319	-3.245	-0.69	-40.263	-9.907
481	F3234-1398	-9.252	-0.298	-3.199	-0.551	-45.719	-9.256
482	F1699-0005	-9.25	-0.343	-2.776	-0.926	-37.78	-10.427
483	F3164-0203	-9.248	-0.298	-3.234	-0.876	-43.881	-8.912
484	F2636-0510	-9.246	-0.272	-3.946	-0.678	-45.827	-8.109
485	F2013-0079	-9.246	-0.289	-3.238	-0.727	-44.513	-8.954
486	F2013-0060	-9.246	-0.289	-3.11	-0.779	-44.469	-9.856
487	F2542-0917	-9.246	-0.342	-3.312	-0.589	-44.786	-6.979
488	F2013-0105	-9.245	-0.33	-3.146	-0.772	-39.481	-10.031
489	F3234-1328	-9.245	-0.289	-2.967	-0.937	-43.144	-10.656
490	F3235-0353	-9.243	-0.289	-3.137	-0.805	-44.966	-10.219
491	F3164-0207	-9.24	-0.308	-3.216	-0.871	-42.05	-9.05
492	F3235-1271	-9.24	-0.289	-3.104	-0.787	-41.093	-12.084
493	F3353-0159	-9.24	-0.298	-2.84	-0.926	-40.078	-12.331
494	F3164-0345	-9.24	-0.342	-2.969	-0.725	-41.556	-8.398
495	F3234-1393	-9.239	-0.33	-3.052	-0.676	-42.273	-9.242
496	F3234-1507	-9.239	-0.33	-3.17	-0.692	-43.173	-8.296
497	F3234-1514	-9.237	-0.298	-3.164	-0.693	-46.979	-8.645
498	F3124-0431	-9.234	-0.289	-3.364	-0.612	-50.088	-6.971
499	F3164-0236	-9.234	-0.308	-3.237	-0.801	-42.699	-9.075
500	F3234-1557	-9.233	-0.289	-3.334	-0.643	-44.841	-8.843
501	F3164-0385	-9.233	-0.33	-2.799	-0.891	-44.41	-8.261
502	F3259-0160	-9.228	-0.33	-2.008	-1.306	-38.876	-12.236
503	F3260-0568	-9.227	-0.308	-3.218	-0.807	-44.3	-10.169
504	F3235-0496	-9.226	-0.355	-3.317	-0.45	-43.164	-7.104
505	F2542-1164	-9.225	-0.264	-3.027	-0.885	-40.158	-14.845
506	F1873-1024	-9.224	-0.318	-3.465	-0.789	-41.596	-11.16
507	F3235-1275	-9.224	-0.318	-3.015	-0.679	-42.456	-9.709
508	F3124-1186	-9.223	-0.329	-2.701	-0.674	-43.239	-9.896
509	F0570-0434	-9.221	-0.297	-3.555	-0.637	-51.105	-6.94
510	F1873-1209	-9.221	-0.297	-3.889	-0.479	-49.506	-7.158
511	asinex3752	-9.218	-0.297	-3.009	-0.829	-46.348	-8.037
512	F3234-1394	-9.218	-0.355	-3.205	-0.584	-44.825	-6.982
513	F0654-0657	-9.218	-0.355	-2.66	-0.942	-37.928	-11.596
514	F3235-0479	-9.217	-0.288	-3.257	-0.593	-46.556	-8.6
515	F3235-0470	-9.217	-0.288	-3.122	-0.793	-44.699	-10.486
516	F2013-0863	-9.215	-0.307	-3.373	-0.524	-48.428	-6.846
517	F3235-1206	-9.213	-0.307	-2.862	-0.928	-38.298	-12.988
518	F2013-0100	-9.212	-0.341	-2.978	-0.687	-39.626	-8.128
519	F3260-0770	-9.207	-0.317	-3.277	-0.827	-42.133	-9.576
520	F2542-1686	-9.207	-0.418	-2.563	-0.814	-38.249	-8.969
521	F2000-0507	-9.206	-0.354	-2.672	-0.919	-39.142	-11.472
522	F1891-0576	-9.205	-0.297	-2.803	-0.929	-40.403	-11.76
523	F2542-1081	-9.205	-0.288	-3.006	-0.743	-49.447	-9.151
524	F3235-0225	-9.204	-0.341	-3.233	-0.512	-45.959	-6.949
525	F3235-0378	-9.203	-0.341	-3.474	-0.456	-43.803	-6.207
526	F3382-5850	-9.201	-0.279	-4.129	-0.843	-53.264	-10.249
527	F3260-0139	-9.201	-0.329	-2.528	-0.927	-40.784	-11.175
528	F3234-1504	-9.199	-0.368	-3.025	-0.647	-37.884	-8.157
529	F3124-1187	-9.199	-0.329	-2.823	-0.617	-42.351	-8.781
530	F2013-0893	-9.197	-0.341	-3.508	-0.417	-45.199	-5.927
531	F2582-0054	-9.196	-0.297	-3.528	-0.838	-37.641	-10.377
532	F2013-0894	-9.194	-0.328	-3.266	-0.688	-42.057	-8.09
533	F3164-0268	-9.194	-0.368	-2.974	-0.768	-38.135	-8.65
534	F3234-0078	-9.192	-0.287	-2.431	-0.817	-48.656	-13.48
535	F3164-0580	-9.189	-0.317	-2.832	-0.779	-43.8	-8.988
536	F3234-1510	-9.188	-0.317	-3.153	-0.843	-41.52	-8.953
537	F2542-0849	-9.188	-0.328	-2.883	-0.833	-43.156	-8.214
538	F3235-0017	-9.187	-0.278	-2.98	-0.914	-42.289	-11.847
539	F3124-0009	-9.186	-0.34	-3.126	-0.614	-41.901	-7.979
540	F3164-0537	-9.184	-0.383	-2.752	-0.78	-39.73	-8.347
541	F0733-0037	-9.183	-0.248	-3.492	-0.953	-45.495	-10.924
542	F0579-0074	-9.181	-0.328	-3.192	-0.553	-46.264	-9.888
543	F1532-0007	-9.181	-0.328	-3.392	-0.786	-41.495	-9.038
544	F3164-0106	-9.18	-0.353	-2.998	-0.666	-38.121	-8.365
545	F3124-1269	-9.18	-0.34	-2.799	-0.597	-40.54	-9.036
546	F3164-0202	-9.179	-0.306	-3.25	-0.686	-45.016	-7.915
547	irinapant (TL3271	-9.179	-0.158	-3.669	-0.459	-57.942	-12.068
548	F2542-0884	-9.178	-0.34	-2.88	-0.872	-43.595	-8.439
549	F2542-0325	-9.177	-0.287	-2.972	-0.689	-46.42	-9.681
550	F2013-0065	-9.176	-0.296	-3.054	-0.656	-47.23	-8.047
551	F2636-0544	-9.176	-0.296	-2.89	-1.23	-39.352	-12.246
552	F0018-0508	-9.173	-0.229	-3.616	-0.917	-51.795	-9.683
553	F2013-0544	-9.172	-0.306	-3.04	-0.783	-42.952	-9.681
554	F3234-1558	-9.171	-0.287	-3.289	-0.612	-46.168	-8.477
555	F3235-0566	-9.171	-0.34	-3.305	-0.444	-46.291	-6.307
556	F2013-0068	-9.169	-0.287	-3.352	-0.622	-46.938	-7.533
557	F2000-0540	-9.169	-0.353	-2.673	-0.92	-38.836	-11.356
558	F1468-0139	-9.168	-0.367	-2.861	-0.923	-37.337	-9.689
559	elfinavir Mesylat	-9.166	-0.229	-3.935	-1.035	-46.349	-14.213
560	F3235-0016	-9.165	-0.278	-3.188	-0.763	-44.851	-11.075
561	F3124-0464	-9.162	-0.327	-2.867	-0.843	-43.071	-8.725
562	F3382-5646	-9.162	-0.278	-4.128	-0.582	-52.993	-8.122
563	F3164-0384	-9.16	-0.339	-2.706	-0.897	-41.483	-7.909
564	F2013-0652	-9.158	-0.339	-2.992	-0.613	-43.17	-7.402
565	F2013-0714	-9.158	-0.316	-3.068	-0.785	-41.057	-10.028
566	F3164-0422	-9.157	-0.316	-2.873	-0.917	-41.992	-11.242
567	F2636-0511	-9.156	-0.269	-3.894	-0.676	-43.669	-9.767
568	F2636-0513	-9.156	-0.269	-4.018	-0.671	-44.454	-9.464
569	F2542-1134	-9.155	-0.305	-3.153	-0.653	-43.464	-8.985
570	F0017-1051	-9.155	-0.339	-2.73	-0.73	-43.615	-7.413
571	F3235-1335	-9.154	-0.352	-2.726	-0.847	-40.14	-8.423
572	-Epicatechin galla	-9.154	-0.286	-2.932	-0.629	-39.781	-22.852
573	F3235-1284	-9.152	-0.286	-2.995	-0.889	-32.704	-14.873
574	F1873-0907	-9.15	-0.295	-3.453	-0.78	-45.21	-8.654
575	F3260-0812	-9.149	-0.398	-2.846	-0.817	-37.591	-8.143
576	F2542-0157	-9.146	-0.352	-2.892	-0.773	-33.159	-10.738
577	F2000-0509	-9.144	-0.366	-2.667	-0.919	-37.453	-11.34
578	F2542-0915	-9.143	-0.327	-3.053	-0.588	-48.397	-6.614
579	F2542-0322	-9.142	-0.339	-3.111	-0.613	-43.02	-8.364
580	F3353-0124	-9.141	-0.339	-3.065	-0.673	-42.2	-8.916
581	F3289-0987	-9.141	-0.326	-2.869	-0.8	-43.631	-9.057
582	F3353-0372	-9.141	-0.352	-2.664	-0.917	-38.514	-11.541
583	F3353-0143	-9.14	-0.286	-3.467	-0.726	-46.001	-9.628
584	F3235-1370	-9.14	-0.305	-2.75	-0.808	-46.103	-9.102
585	F3235-0365	-9.138	-0.326	-3.291	-0.593	-43.202	-8.78
586	F3164-0534	-9.137	-0.351	-2.62	-0.932	-37.878	-10.982
587	F2542-1687	-9.137	-0.397	-2.627	-0.81	-40.5	-9.046
588	F0913-4128	-9.137	-0.234	-4.821	-0.689	-57.607	-5.753
589	F3234-1413	-9.136	-0.285	-3.045	-0.631	-49.875	-7.649
590	asinex623	-9.135	-0.305	-3.732	-0.857	-45.504	-11.173
591	F2542-1135	-9.134	-0.295	-3.439	-0.577	-49.821	-6.575
592	F3124-0511	-9.134	-0.304	-3.118	-0.763	-46.335	-8.948
593	F3064-0122	-9.133	-0.269	-3.714	-0.658	-47.348	-8.362
594	F3235-0218	-9.133	-0.351	-3.293	-0.425	-45.069	-6.2
595	F0886-0101	-9.133	-0.315	-3.476	-0.62	-42.981	-7.933
596	F3234-1389	-9.132	-0.326	-3.217	-0.687	-42.133	-8.368
597	asinex8443	-9.131	-0.304	-2.96	-0.944	-44.376	-12.561
598	F3259-0464	-9.129	-0.315	-3.315	-0.719	-44.095	-8.707
599	F3234-1516	-9.129	-0.285	-3.149	-0.697	-47.455	-8.437
600	F2636-0221	-9.128	-0.277	-3.866	-0.669	-44.054	-8.973
601	F3234-1370	-9.128	-0.285	-2.884	-0.927	-42.607	-10.614
602	F3164-0041	-9.125	-0.326	-3.131	-0.605	-44.121	-7.997
603	F1608-0581	-9.124	-0.276	-3.391	-1.186	-49.024	-10.397
604	asinex2360	-9.123	-0.268	-3.715	-0.42	-56.585	-10.739
605	asinex264	-9.123	-0.304	-4.117	-0.859	-48.739	-9.403
606	F2542-0360	-9.123	-0.268	-2.991	-0.704	-47.492	-9.989
607	F2636-0371	-9.123	-0.268	-3.794	-0.67	-45.057	-9.313
608	F3235-0339	-9.122	-0.351	-3.036	-0.548	-41.622	-7.295
609	F2542-1044	-9.122	-0.304	-3.044	-0.761	-44.712	-8.899
610	F3064-0146	-9.122	-0.294	-3.555	-0.563	-43.673	-9.095
611	F1191-0083	-9.121	-0.326	-2.131	-1.253	-39.511	-12.45
612	F3164-0138	-9.119	-0.304	-3.265	-0.801	-41.101	-10.103
613	F0373-0541	-9.118	-0.314	-2.99	-0.83	-42.639	-8.996
614	F3124-0094	-9.117	-0.285	-3.236	-0.64	-47.519	-8.593
615	F2013-0133	-9.116	-0.285	-3.215	-0.788	-39.707	-11.023
616	F2013-0653	-9.115	-0.314	-3.326	-0.475	-48.118	-6.497
617	F3289-0985	-9.113	-0.338	-2.699	-0.8	-43.077	-9.664
618	F2475-2755	-9.112	-0.285	-2.833	-0.928	-44.846	-10.268
619	F3234-1555	-9.109	-0.294	-3.35	-0.543	-45.902	-7.925
620	F0570-0392	-9.109	-0.26	-3.214	-0.696	-50.52	-10.344
621	F2636-0508	-9.107	-0.268	-3.869	-0.672	-43.469	-9.773
622	F3260-0037	-9.106	-0.325	-3.227	-0.922	-41.152	-9.695
623	F2542-1048	-9.105	-0.285	-2.977	-0.741	-47.468	-9.299
624	F2542-1040	-9.103	-0.314	-2.971	-0.76	-45.081	-8.823
625	F3235-0080	-9.103	-0.337	-2.738	-0.819	-40.609	-8.697
626	F3235-0015	-9.103	-0.294	-3.001	-0.739	-49.093	-8.727
627	F2013-0026	-9.103	-0.284	-2.933	-0.753	-44.99	-9.829
628	asinex8378	-9.102	-0.284	-3.164	-0.655	-51.371	-8.086
629	F3124-1188	-9.102	-0.303	-2.575	-0.666	-43.839	-10.254
630	F0579-0046	-9.102	-0.222	-3.811	-0.653	-59.893	-9.424
631	F2013-0437	-9.101	-0.325	-2.968	-0.789	-43.157	-9.55
632	F1873-0873	-9.1	-0.314	-3.445	-0.771	-41.776	-10.503
633	F3235-0510	-9.1	-0.294	-3.006	-0.69	-46.122	-8.715
634	F1614-0105	-9.099	-0.268	-2.871	-0.715	-53.522	-9.61
635	F2636-0370	-9.099	-0.26	-4.018	-0.667	-45.98	-8.951
636	F2542-1157	-9.099	-0.294	-3.347	-0.557	-49.015	-7.277
637	F3235-0024	-9.098	-0.314	-3.141	-0.613	-44.532	-8.737
638	F2582-0319	-9.097	-0.35	-2.09	-0.9	-39.432	-13.651
639	F0886-0049	-9.094	-0.276	-3.867	-0.66	-45.922	-8.907
640	F2542-0836	-9.094	-0.293	-2.861	-0.796	-41.614	-11.862
641	F3234-1512	-9.093	-0.325	-3.153	-0.683	-42.935	-8.247
642	F0654-1516	-9.093	-0.325	-3.404	-0.78	-44.429	-9.768
643	F0372-0041	-9.092	-0.337	-2.201	-1.166	-44.223	-10.413
644	F0648-0490	-9.091	-0.267	-3.06	-1.247	-53.818	-10.497
645	F2542-1418	-9.09	-0.35	-2.829	-0.663	-38.909	-8.156
646	F3164-0536	-9.09	-0.35	-2.644	-0.795	-41.904	-8.849
647	F2542-0690	-9.089	-0.364	-2.771	-0.814	-38.844	-8.61
648	F2542-1702	-9.089	-0.325	-2.235	-0.928	-42.053	-11.856
649	F3234-0400	-9.089	-0.325	-2.635	-0.785	-44.976	-9.478
650	F3164-0556	-9.088	-0.303	-2.756	-0.787	-39.994	-11.104
651	F2636-0229	-9.087	-0.267	-4.04	-0.669	-44.959	-8.583
652	F3353-0127	-9.086	-0.349	-2.92	-0.743	-40.074	-9.641
653	F0654-1513	-9.085	-0.324	-3.486	-0.786	-43.365	-9.467
654	F3124-0474	-9.085	-0.324	-2.884	-0.853	-43.479	-8.573
655	F0886-0041	-9.084	-0.275	-3.815	-0.671	-44.298	-9.425
656	F1873-2232	-9.083	-0.303	-3.637	-0.728	-45.005	-8.813
657	F2013-0904	-9.083	-0.293	-3.251	-0.635	-44.781	-8.089
658	F2636-0227	-9.083	-0.267	-3.848	-0.672	-44.09	-9.172
659	F3260-0464	-9.083	-0.324	-2.734	-0.81	-46.821	-8.603
660	F3164-0576	-9.082	-0.336	-2.728	-0.786	-41.408	-9.065
661	F0403-0044	-9.081	-0.313	-3.155	-0.796	-42.705	-10.441
662	F3234-0081	-9.079	-0.275	-2.378	-0.812	-48.519	-13.6
663	F3235-0606	-9.079	-0.324	-3.145	-0.553	-45.068	-8.367
664	F3164-0082	-9.079	-0.275	-3.044	-0.842	-47.048	-8.902
665	F3234-1556	-9.078	-0.284	-3.273	-0.594	-46.268	-8.292
666	F0648-0498	-9.076	-0.259	-3.112	-1.286	-54.173	-10.053
667	F0654-1305	-9.075	-0.313	-2.933	-0.933	-40.455	-10.276
668	asinex613	-9.074	-0.302	-3.132	-1.192	-40.776	-13.387
669	F2636-0225	-9.074	-0.259	-4.068	-0.664	-47.152	-7.91
670	F2542-0882	-9.074	-0.324	-2.748	-0.868	-44.394	-8.627
671	F2583-0364	-9.073	-0.302	-2.605	-1.231	-38.569	-12.884
672	F3235-0109	-9.073	-0.293	-2.843	-0.795	-44.755	-8.867
673	F0922-0857	-9.072	-0.252	-3.38	-1.203	-48.645	-13.015
674	F3164-0290	-9.072	-0.284	-2.953	-0.92	-42.05	-11.279
675	F3164-0607	-9.07	-0.302	-2.815	-0.777	-44.603	-9.321
676	F2542-0742	-9.07	-0.336	-2.693	-0.798	-43.092	-9.319
677	asinex3753	-9.068	-0.324	-3.072	-0.96	-36.334	-14.486
678	F2542-0346	-9.067	-0.292	-2.978	-0.687	-45.165	-9.759
679	F2455-0529	-9.067	-0.324	-3.826	-0.895	-46.013	-7.202
680	F3234-1561	-9.065	-0.283	-3.313	-0.56	-46.449	-7.951
681	F3234-1560	-9.064	-0.283	-3.211	-0.545	-47.866	-7.464
682	F3260-0576	-9.062	-0.283	-3.19	-1.256	-40.342	-12.256
683	F3124-0477	-9.062	-0.283	-2.865	-0.847	-48.139	-8.897
684	F3382-5042	-9.062	-0.312	-3.698	-0.876	-48.778	-10.586
685	F1191-0052	-9.061	-0.349	-2.177	-1.263	-39.094	-11.014
686	F1873-1102	-9.06	-0.302	-3.81	-0.398	-50.081	-6.342
687	F0372-0044	-9.059	-0.324	-2.466	-0.778	-41.582	-11.514
688	F3235-0508	-9.058	-0.292	-2.906	-0.794	-43.574	-10.505
689	F3235-0260	-9.058	-0.335	-3.226	-0.526	-45.026	-6.106
690	F2636-0505	-9.058	-0.274	-3.879	-0.668	-42.965	-9.58
691	F0570-0335	-9.058	-0.302	-3.295	-0.703	-44.958	-8.378
692	F3164-0079	-9.058	-0.312	-3.151	-0.693	-45.268	-7.338
693	F3234-1261	-9.057	-0.362	-2.844	-0.672	-34.704	-9.291
694	Rutin (Rutoside)	-9.057	-0.211	-2.616	-0.16	-52.016	-24.686
695	F3259-0162	-9.056	-0.312	-2.561	-0.789	-39.971	-11.305
696	asinex292	-9.054	-0.348	-2.157	-1.324	-40.105	-15.988
697	F3164-0108	-9.053	-0.323	-3.259	-0.559	-43.227	-7.517
698	F2013-0695	-9.053	-0.292	-3.225	-0.587	-46.101	-7.802
699	F1609-0493	-9.052	-0.266	-4.055	-0.674	-55.469	-8.189
700	F2542-1045	-9.05	-0.323	-2.935	-0.736	-43.016	-8.996
701	F2542-0990	-9.049	-0.335	-3.089	-0.657	-40.904	-7.768
702	F3234-1511	-9.048	-0.335	-3.09	-0.693	-41.22	-8.449
703	F3235-1426	-9.046	-0.283	-3.011	-0.871	-44.412	-9.55
704	F3235-1371	-9.046	-0.292	-2.794	-0.798	-46.499	-9.179
705	F3353-0418	-9.046	-0.348	-2.815	-0.769	-39.427	-8.618
706	F3382-5858	-9.045	-0.266	-3.965	-0.912	-51.801	-10.314
707	F2013-0113	-9.045	-0.335	-2.945	-0.618	-40.469	-7.322
708	F2542-1685	-9.044	-0.431	-2.424	-0.806	-35.248	-8.816
709	F3164-0588	-9.042	-0.301	-2.868	-0.795	-45.345	-8.877
710	F0372-0043	-9.041	-0.335	-2.497	-0.926	-40.757	-10.253
711	F3124-0275	-9.04	-0.292	-2.73	-0.834	-42.357	-10.807
712	F2542-1641	-9.039	-0.411	-2.454	-0.79	-38.511	-8.737
713	F2013-0062	-9.039	-0.348	-2.888	-0.613	-40.867	-8.256
714	F3235-0565	-9.039	-0.348	-3.113	-0.457	-43.189	-6.262
715	F3124-0465	-9.037	-0.312	-2.89	-0.842	-44.88	-8.358
716	F2582-0011	-9.036	-0.361	-3.033	-0.538	-40.65	-7.312
717	F2542-0164	-9.036	-0.335	-2.972	-0.809	-34.794	-10.546
718	F1873-1058	-9.035	-0.291	-3.233	-0.931	-44.951	-8.805
719	F3024-0011	-9.034	-0.376	-2.799	-0.582	-38.688	-7.659
720	F2542-0940	-9.033	-0.301	-3.114	-0.593	-47.493	-8.144
721	F2636-0369	-9.033	-0.266	-3.805	-0.671	-44.999	-9.337
722	F2542-1423	-9.032	-0.347	-2.802	-0.782	-39.597	-8.606
723	F0648-0496	-9.032	-0.258	-3.203	-1.286	-55.256	-8.682
724	F3234-0725	-9.032	-0.291	-2.877	-0.743	-46.505	-9.293
725	F3234-0534	-9.032	-0.274	-2.334	-0.715	-48.022	-14.528
726	F3124-1048	-9.029	-0.334	-2.543	-0.9	-41.323	-10.166
727	F3260-0563	-9.029	-0.322	-2.866	-0.918	-40.253	-10.42
728	F0654-0660	-9.028	-0.334	-2.711	-0.881	-39.931	-10.078
729	F3234-1513	-9.028	-0.322	-3.066	-0.689	-42.239	-8.479
730	F2636-0230	-9.028	-0.266	-3.857	-0.671	-44.972	-8.979
731	F2000-0711	-9.027	-0.282	-2.937	-0.857	-47.571	-8.157
732	asinex4989	-9.026	-0.361	-1.922	-1.179	-38.061	-10.76
733	F3289-0988	-9.026	-0.322	-2.618	-0.785	-39.438	-11.242
734	F2636-0272	-9.025	-0.265	-3.881	-0.616	-47.152	-8.232
735	F2636-0228	-9.025	-0.265	-4.014	-0.669	-44.497	-8.672
736	F3234-1425	-9.025	-0.322	-2.914	-0.688	-43.143	-8.506
737	F1607-0708	-9.022	-0.258	-4.001	-0.678	-58.486	-7.589
738	F3234-1342	-9.019	-0.392	-2.627	-0.899	-32.838	-10.348
739	F2542-1133	-9.019	-0.311	-3.189	-0.487	-48.996	-5.152
740	F3260-0153	-9.018	-0.322	-2.435	-0.928	-42.232	-10.733
741	F2636-0372	-9.016	-0.265	-3.798	-0.672	-44.814	-9.454
742	F1717-0026	-9.015	-0.273	-3.781	-0.743	-45.885	-10.398
743	F2013-0025	-9.014	-0.361	-2.856	-0.598	-38.65	-7.874
744	F2542-0101	-9.014	-0.322	-3.122	-0.556	-45.321	-6.94
745	F3124-0500	-9.013	-0.273	-2.937	-0.903	-40.808	-11.818
746	F3164-0366	-9.011	-0.273	-2.933	-0.905	-43.139	-10.607
747	F0823-0102	-9.01	-0.347	-3.024	-0.798	-40.203	-8.36
748	F2013-0055	-9.01	-0.375	-2.717	-0.613	-38.497	-7.612
749	F2542-0779	-9.01	-0.25	-2.78	-0.796	-54.071	-9.605
750	F2013-0868	-9.009	-0.282	-3.025	-0.628	-42.258	-10.782
751	F3259-0187	-9.009	-0.3	-2.574	-0.774	-40.997	-11.237
752	F2013-0740	-9.008	-0.273	-3.018	-0.644	-47.321	-8.665
753	F3234-0695	-9.008	-0.291	-2.882	-0.744	-46.48	-9.062
754	F3164-0073	-9.008	-0.322	-3.106	-0.555	-42.234	-8.394
755	F2542-0821	-9.008	-0.346	-2.917	-0.738	-41.245	-8.622
756	F3382-5835	-9.007	-0.291	-3.742	-0.844	-49.044	-10.148
757	F2636-0507	-9.006	-0.265	-3.834	-0.671	-42.834	-9.552
758	F3234-0401	-9.006	-0.322	-2.654	-0.794	-45.108	-8.873
759	F2542-0820	-9.002	-0.322	-2.969	-0.793	-41.637	-8.232
760	F0403-0022	-9.002	-0.333	-3.125	-0.796	-40.858	-10.441
761	F3235-1376	-9.001	-0.257	-2.708	-0.801	-52.81	-9.534
762	F2636-0324	-9.001	-0.265	-3.642	-0.616	-45.317	-8.479
763	F2542-1700	-9.001	-0.321	-2.532	-0.799	-45.526	-9.566
764	F1869-0015	-9	-0.346	-2.41	-0.898	-40.871	-9.998
765	F3234-1552	-9	-0.333	-3.34	-0.473	-45.562	-6.074
766	F2013-0719	-8.999	-0.281	-2.685	-0.924	-44.97	-11.191
767	F3382-1033	-8.998	-0.243	-3.155	-1.215	-41.969	-16.017
768	F1532-0013	-8.998	-0.3	-3.096	-0.652	-45.263	-11.08
769	F3234-1384	-8.996	-0.391	-2.767	-0.652	-40.009	-7.655
770	F3124-1189	-8.996	-0.31	-2.915	-0.649	-43.407	-8.113
771	F3124-0038	-8.995	-0.281	-3.054	-0.872	-43.539	-8.328
772	F2636-0224	-8.992	-0.264	-3.898	-0.668	-43.787	-8.753
773	F3164-0410	-8.99	-0.272	-2.788	-0.893	-47.292	-7.937
774	F3235-0110	-8.987	-0.281	-2.964	-0.636	-48.822	-8.131
775	F1603-0246	-8.987	-0.281	-3.823	-0.532	-55.652	-6.214
776	F1167-0066	-8.986	-0.281	-3.197	-0.445	-51.216	-8.198
777	F2542-0704	-8.986	-0.3	-2.729	-0.895	-39.404	-9.894
778	F3234-0720	-8.985	-0.321	-2.839	-0.755	-43.728	-8.939
779	F0659-0226	-8.985	-0.31	-3.478	-0.613	-48.364	-7.234
780	F3176-0006	-8.985	-0.449	-2.355	-0.795	-31.763	-9.172
781	asinex284	-8.983	-0.281	-3.89	-0.744	-51.13	-9.975
782	F0612-0213	-8.983	-0.31	-3.573	-0.837	-51.137	-11.451
783	F0654-1504	-8.983	-0.333	-3.329	-0.78	-42.739	-9.651
784	F3260-0787	-8.981	-0.321	-2.706	-0.927	-37.671	-10.205
785	F3164-0582	-8.981	-0.299	-2.565	-0.864	-46.787	-8.372
786	F3235-0020	-8.981	-0.31	-3.064	-0.609	-45.505	-7.975
787	asinex2678	-8.98	-0.299	-3.949	-0.666	-46.275	-8.147
788	F2582-0160	-8.98	-0.321	-2.765	-0.822	-43.048	-8.211
789	F3234-0690	-8.98	-0.321	-3.299	-0.513	-44.078	-7.557
790	F2013-0438	-8.98	-0.31	-3.198	-0.738	-43.597	-8.816
791	F2013-0907	-8.979	-0.281	-3.274	-0.611	-44.679	-8.041
792	F3289-0990	-8.979	-0.321	-2.631	-0.784	-43.617	-9.821
793	F2475-0086	-8.979	-0.299	-3.587	-0.584	-49.028	-6.237
794	F3234-0402	-8.979	-0.321	-2.589	-0.794	-45.588	-8.965
795	F2636-0332	-8.978	-0.243	-3.817	-0.664	-46.084	-9.207
796	F2636-0223	-8.978	-0.264	-3.899	-0.666	-43.791	-8.774
797	F3259-0185	-8.977	-0.31	-2.139	-1.124	-40.49	-11.617
798	F3353-0150	-8.977	-0.321	-3.24	-0.722	-44.297	-8.534
799	F1614-0030	-8.977	-0.321	-2.776	-0.796	-38.404	-10.865
800	F1167-0092	-8.976	-0.359	-3.071	-0.832	-40.077	-8.065
801	F3124-0956	-8.975	-0.345	-2.996	-0.941	-34.997	-10.819
802	F3164-0577	-8.974	-0.359	-2.562	-0.827	-40.035	-8.604
803	F1687-0044	-8.973	-0.32	-3.319	-0.816	-39.117	-9.949
804	F2475-2909	-8.972	-0.289	-2.597	-0.933	-47.182	-10.16
805	F3234-1544	-8.971	-0.374	-3.161	-0.485	-40.366	-7.052
806	F3260-0154	-8.971	-0.32	-2.446	-0.936	-40.716	-11.239
807	F3289-0989	-8.97	-0.32	-2.651	-0.793	-43.865	-9.272
808	F2636-0146	-8.969	-0.332	-2.198	-1.293	-35.606	-13.177
809	F3234-0077	-8.969	-0.289	-2.025	-0.904	-47.059	-14.373
810	asinex708	-8.968	-0.32	-3.983	-0.839	-44.635	-11.424
811	F3234-1508	-8.967	-0.309	-3.155	-0.706	-44.198	-8.492
812	1126164-R-01	-8.965	-0.289	-2.831	-0.923	-45.742	-56.601
813	F3234-0844	-8.965	-0.309	-2.607	-0.783	-46.267	-9.074
814	F3164-0573	-8.964	-0.345	-2.724	-0.792	-40.611	-8.103
815	F3289-1012	-8.964	-0.309	-2.655	-0.8	-43.915	-9.857
816	F2013-0622	-8.963	-0.359	-3.083	-0.63	-38.667	-6.444
817	F3353-0151	-8.963	-0.332	-2.697	-0.753	-38.949	-9.743
818	F2636-0251	-8.962	-0.264	-3.87	-0.662	-45.189	-9.036
819	F2636-0368	-8.962	-0.264	-3.798	-0.67	-44.133	-9.388
820	F0612-0180	-8.961	-0.32	-3.494	-0.82	-48.753	-11.758
821	F2013-0721	-8.96	-0.272	-2.727	-0.917	-45.105	-11.256
822	F3235-0419	-8.96	-0.332	-3.023	-0.616	-39.501	-7.59
823	F2542-0780	-8.959	-0.249	-2.7	-0.8	-53.377	-9.652
824	F3234-1428	-8.957	-0.345	-2.958	-0.618	-39.661	-7.015
825	F3164-0074	-8.956	-0.309	-3.114	-0.639	-44.343	-8.398
826	F2013-0726	-8.954	-0.263	-2.92	-0.873	-45.588	-11.364
827	F3289-1016	-8.954	-0.271	-2.998	-0.789	-47.462	-8.504
828	F3353-0453	-8.954	-0.389	-2.561	-0.61	-39.827	-7.294
829	F1051-0121	-8.953	-0.373	-2.518	-0.926	-35.502	-9.624
830	F0579-0026	-8.95	-0.309	-3.762	-0.576	-53.793	-9.306
831	F3235-0689	-8.949	-0.28	-2.962	-0.753	-44.519	-9.261
832	F2582-0257	-8.948	-0.309	-2.941	-0.802	-43.74	-7.846
833	F3289-0961	-8.948	-0.309	-2.658	-0.778	-43.489	-9.467
834	F3235-0256	-8.947	-0.331	-3.344	-0.361	-46.788	-6.119
835	F3289-1208	-8.946	-0.308	-3.081	-0.581	-41.735	-9.548
836	F2013-0038	-8.944	-0.271	-3.311	-0.518	-43.602	-8.391
837	F1191-0085	-8.944	-0.358	-2.069	-1.259	-37.717	-11.275
838	F1607-0478	-8.943	-0.298	-3.704	-0.8	-51.386	-9.454
839	F3234-0386	-8.942	-0.373	-2.938	-0.631	-40.993	-7.353
840	F1468-0062	-8.942	-0.319	-3.159	-0.806	-41.691	-10.476
841	F3234-1327	-8.939	-0.288	-2.833	-0.885	-41.98	-9.016
842	F2542-1155	-8.938	-0.255	-2.987	-0.888	-39.47	-12.564
843	F3164-0386	-8.938	-0.308	-2.697	-0.886	-44.504	-8.313
844	F3235-0355	-8.938	-0.279	-2.953	-0.628	-47.98	-8.288
845	F1289-0019	-8.938	-0.279	-3.187	-0.858	-46.523	-11.836
846	F3164-0072	-8.937	-0.331	-3.01	-0.597	-39.138	-8.343
847	F2583-0494	-8.937	-0.263	-3.129	-0.817	-50.912	-7.538
848	asinex5244	-8.935	-0.344	-3.342	-0.925	-39.486	-12.309
849	F0669-0314	-8.935	-0.241	-4.436	-0.846	-55.288	-7.321
850	F2636-0247	-8.935	-0.263	-3.924	-0.613	-48.009	-8.197
851	F1607-0981	-8.935	-0.255	-3.847	-0.675	-54.937	-8.983
852	F0570-0370	-8.935	-0.298	-3.364	-0.636	-47.05	-7.09
853	F3235-0219	-8.934	-0.331	-3.333	-0.436	-47.108	-5.486
854	F3260-0802	-8.93	-0.319	-2.927	-0.932	-40.325	-9.898
855	F3164-0223	-8.929	-0.288	-2.817	-0.922	-43.597	-11.728
856	asinex742	-8.928	-0.271	-4.472	-0.561	-49.266	-6.305
857	F3289-0955	-8.927	-0.308	-2.534	-0.89	-44.29	-9.196
858	F1892-0077	-8.926	-0.279	-2.901	-0.763	-44.975	-9.576
859	F2582-0303	-8.925	-0.357	-2.009	-0.901	-37.304	-13.336
860	F2013-0510	-8.924	-0.279	-3.11	-0.618	-46.927	-8.142
861	F3234-0843	-8.923	-0.308	-2.637	-0.783	-45.415	-8.91
862	F3235-0575	-8.922	-0.288	-3.088	-0.585	-45.154	-8.13
863	F3234-1554	-8.921	-0.319	-3.204	-0.48	-44.713	-6.839
864	F3260-0885	-8.92	-0.372	-2.76	-0.809	-37.527	-10.466
865	F3234-0080	-8.92	-0.279	-2.043	-0.848	-49.173	-13.883
866	F2636-0253	-8.92	-0.262	-3.965	-0.625	-48.049	-8.117
867	F3235-1369	-8.92	-0.308	-2.538	-0.798	-43.469	-9.334
868	F3234-1305	-8.919	-0.319	-2.814	-0.861	-42.275	-8.072
869	F2582-0006	-8.919	-0.343	-2.821	-0.656	-40.789	-7.457
870	F3234-0727	-8.919	-0.279	-2.715	-0.762	-47.524	-9.269
871	F3164-0075	-8.919	-0.297	-3.004	-0.785	-44.234	-8.165
872	F2636-0570	-8.917	-0.288	-3.262	-0.781	-37.863	-11.548
873	F3164-0258	-8.917	-0.297	-2.831	-0.87	-44.91	-9.587
874	F3124-0631	-8.916	-0.279	-2.731	-0.792	-42.671	-10.629
875	F0823-0103	-8.915	-0.343	-3.258	-0.795	-40.269	-9.37
876	F0886-0102	-8.914	-0.262	-3.557	-0.666	-46.564	-7.929
877	F2542-0380	-8.914	-0.262	-2.97	-0.884	-39.022	-12.144
878	F3235-0991	-8.914	-0.343	-2.969	-0.64	-40.005	-7.521
879	F3382-5853	-8.913	-0.307	-3.687	-0.675	-46.373	-8.607
880	F2636-0381	-8.913	-0.297	-2.496	-0.9	-41.538	-13.346
881	F3234-1519	-8.913	-0.279	-3.118	-0.681	-47.033	-8.294
882	F3124-0011	-8.912	-0.307	-2.864	-0.783	-43.335	-8.979
883	F2013-0634	-8.912	-0.287	-3.102	-0.695	-46.667	-7.215
884	F3235-0393	-8.911	-0.278	-3.344	-0.563	-40.998	-7.997
885	F0886-0023	-8.911	-0.33	-2.526	-0.905	-36.611	-10.083
886	F3234-0531	-8.911	-0.278	-2.17	-0.891	-48.22	-13.466
887	F3124-0543	-8.91	-0.262	-3.01	-0.817	-44.702	-10.217
888	F2636-0321	-8.909	-0.262	-3.72	-0.616	-46.103	-8.41
889	F0648-0359	-8.908	-0.255	-3.516	-0.608	-57.801	-8.109
890	F0373-0806	-8.908	-0.356	-3.308	-0.791	-41.324	-9.718
891	F3260-0167	-8.908	-0.307	-3.788	-0.566	-47.043	-7.244
892	F3164-0583	-8.907	-0.297	-2.558	-0.854	-45.75	-8.415
893	F3234-1383	-8.906	-0.318	-2.757	-0.938	-38.495	-11.254
894	F0570-0308	-8.905	-0.318	-2.637	-0.893	-43.915	-8.467
895	F2542-1419	-8.904	-0.33	-2.758	-0.817	-39.904	-8.355
896	F3234-1515	-8.904	-0.278	-3.117	-0.678	-46.709	-8.546
897	F2477-0069	-8.903	-0.318	-2.943	-0.926	-41.719	-11.034
898	F3289-0983	-8.902	-0.342	-2.441	-0.799	-40.469	-9.404
899	asinex503	-8.9	-0.307	-3.411	-0.884	-45.357	-11.955
900	F5320-0203	-8.9	-0.307	-3.358	-0.673	-43.653	-9.483
901	F2013-0001	-8.9	-0.387	-2.692	-0.578	-37.653	-7.169
902	F3235-0079	-8.899	-0.371	-2.766	-0.617	-41.93	-6.335
903	F2582-0321	-8.899	-0.404	-2.493	-0.778	-35.344	-8.512
904	F2013-0689	-8.898	-0.342	-3.142	-0.524	-42.846	-6.717
905	F3164-0113	-8.897	-0.318	-2.966	-0.686	-42.007	-8.265
906	F2582-0299	-8.897	-0.278	-2.985	-0.717	-48.596	-9.222
907	F0886-0031	-8.895	-0.27	-3.752	-0.615	-46.001	-7.651
908	F2542-1070	-8.895	-0.278	-2.974	-0.751	-48.104	-8.88
909	F3353-0423	-8.895	-0.329	-2.812	-0.745	-41.324	-8.878
910	F3259-0143	-8.895	-0.287	-3.124	-0.724	-42.019	-9.057
911	F3164-0109	-8.895	-0.307	-2.932	-0.693	-43.481	-8.196
912	F3234-0409	-8.895	-0.307	-2.483	-0.794	-39.443	-10.83
913	F3406-2652	-8.893	-0.307	-3.285	-0.793	-45.703	-7.432
914	F3234-1369	-8.891	-0.287	-2.774	-0.901	-38.014	-10.514
915	F3234-1392	-8.891	-0.329	-3.003	-0.576	-44.502	-6.469
916	F2636-0254	-8.89	-0.261	-3.845	-0.658	-46.269	-8.826
917	F0654-0875	-8.889	-0.287	-3.052	-0.917	-44.821	-9.897
918	F0648-0437	-8.888	-0.261	-3.906	-0.616	-50.024	-7.902
919	F2013-0602	-8.888	-0.278	-3.247	-0.854	-37.992	-9.678
920	F3164-0081	-8.886	-0.296	-3.128	-0.622	-44.696	-8.177
921	F2013-0035	-8.885	-0.329	-3.409	-0.439	-43.4	-5.73
922	F2582-0092	-8.885	-0.269	-3.562	-0.659	-52.034	-7.882
923	F2013-0632	-8.884	-0.278	-3.212	-0.862	-39.064	-9.021
924	F2636-0252	-8.884	-0.261	-3.976	-0.613	-47.637	-8.069
925	F0513-0302	-8.883	-0.278	-3.926	-0.6	-52.587	-8.692
926	F2013-0867	-8.882	-0.287	-3.259	-0.472	-49.944	-6.228
927	F2013-0687	-8.882	-0.329	-3.117	-0.524	-43.12	-6.841
928	asinex640	-8.881	-0.306	-3.087	-0.76	-44.332	-12.089
929	F0648-0587	-8.881	-0.261	-3.041	-1.257	-53.526	-9.079
930	F2013-0033	-8.88	-0.37	-3.054	-0.512	-36.134	-8.293
931	F2542-1701	-8.877	-0.317	-2.455	-0.818	-45.773	-9.174
932	F2636-0375	-8.877	-0.261	-3.802	-0.671	-44.138	-9.447
933	F1891-0397	-8.876	-0.386	-2.733	-0.861	-34.662	-9.354
934	F2013-0010	-8.876	-0.286	-2.933	-0.701	-42.924	-9.087
935	F2692-0764	-8.876	-0.277	-4.244	-0.617	-56.834	-5.697
936	F2013-0063	-8.876	-0.329	-2.892	-0.615	-42.425	-8.03
937	F3259-0467	-8.874	-0.329	-2.297	-0.861	-43.94	-8.627
938	F3234-0339	-8.872	-0.317	-2.762	-0.842	-43.326	-7.722
939	F3289-0986	-8.872	-0.329	-2.563	-0.795	-41.023	-9.071
940	F2477-0121	-8.87	-0.386	-2.578	-0.83	-35.803	-7.929
941	F2013-0718	-8.868	-0.296	-2.734	-0.91	-41.229	-10.872
942	F2013-0532	-8.868	-0.369	-2.782	-0.613	-38.24	-7.127
943	F2774-6092	-8.866	-0.306	-2.966	-0.637	-47.813	-10.588
944	F3164-1111	-8.865	-0.296	-2.812	-0.815	-41.571	-9.583
945	asinex7528	-8.864	-0.269	-4.525	-0.328	-49.636	-5.516
946	F2514-0301	-8.864	-0.269	-3.571	-0.517	-48.888	-7.045
947	F3235-0519	-8.863	-0.286	-3.258	-0.54	-43.205	-7.691
948	F2013-0697	-8.863	-0.286	-3.271	-0.558	-44.601	-7.305
949	F3234-1530	-8.863	-0.269	-3.234	-0.532	-45.782	-8.538
950	F2233-0392	-8.861	-0.269	-3.148	-1.166	-47.75	-10.944
951	F3164-0126	-8.861	-0.269	-3.228	-0.742	-41.563	-9.937
952	F3235-0098	-8.86	-0.341	-2.524	-0.779	-39.284	-8.905
953	F3164-0110	-8.859	-0.295	-3.191	-0.706	-45.682	-7.954
954	F0612-0228	-8.857	-0.341	-3.478	-0.74	-46.255	-11.016
955	F3234-0828	-8.856	-0.354	-2.494	-0.779	-41.728	-8.575
956	F3234-0094	-8.856	-0.268	-1.975	-0.902	-47.572	-14.457
957	F2542-0781	-8.855	-0.246	-2.671	-0.797	-50.555	-10.116
958	F2013-0895	-8.854	-0.305	-3.036	-0.733	-40.679	-9.231
959	F3260-0771	-8.853	-0.305	-3.048	-0.834	-43.141	-8.761
960	asinex97	-8.852	-0.277	-3.451	-0.872	-51.778	-7.32
961	F3234-0591	-8.851	-0.295	-2.508	-0.793	-40.452	-10.712
962	F3234-1329	-8.85	-0.277	-2.808	-0.815	-45.761	-8.304
963	F0921-3789	-8.848	-0.305	-3.736	-0.658	-42.798	-6.562
964	F3235-0108	-8.847	-0.295	-2.599	-0.793	-43.973	-9.275
965	F1607-0952	-8.847	-0.268	-3.963	-0.613	-57.055	-7.092
966	asinex7071	-8.846	-0.285	-3.167	-0.346	-50.083	-8.154
967	F3289-1028	-8.844	-0.305	-2.625	-0.716	-40.701	-10.852
968	F0017-1019	-8.843	-0.328	-2.843	-0.828	-39.916	-9.898
969	F2013-0466	-8.843	-0.295	-2.757	-0.739	-42.06	-8.745
970	F2013-0906	-8.841	-0.276	-2.785	-0.854	-42.813	-10.508
971	F2542-1417	-8.84	-0.354	-2.633	-0.649	-37.862	-7.189
972	F1873-0855	-8.84	-0.276	-3.122	-0.765	-44.872	-10.822
973	F2013-0005	-8.84	-0.354	-2.722	-0.644	-39.814	-8.281
974	F2013-0266	-8.839	-0.276	-3.762	-0.522	-48.92	-8.171
975	F0612-0181	-8.839	-0.316	-3.483	-0.782	-48.019	-11.993
976	F5337-0336	-8.838	-0.316	-3.138	-0.849	-48.096	-10.355
977	F2013-0696	-8.838	-0.285	-3.073	-0.611	-45.146	-7.676
978	F2636-0298	-8.838	-0.253	-4.015	-0.667	-40.242	-8.813
979	F0654-1384	-8.838	-0.316	-3.262	-0.801	-41.642	-9.33
980	F3164-0489	-8.836	-0.276	-3.314	-1.175	-40.64	-14.699
981	F0017-1854	-8.833	-0.34	-3.059	-0.827	-39.062	-9.287
982	F2636-0284	-8.833	-0.239	-3.871	-0.665	-46.627	-8.921
983	F0648-0482	-8.833	-0.252	-3.441	-0.868	-57.533	-7.207
984	F0654-0897	-8.833	-0.294	-2.958	-0.78	-44.886	-9.554
985	F3234-1542	-8.832	-0.305	-3.127	-0.687	-44.157	-7.954
986	F0654-1390	-8.831	-0.285	-3.197	-0.774	-43.111	-9.218
987	F3289-1233	-8.831	-0.305	-2.633	-0.797	-45.004	-9.257
988	F0648-0633	-8.831	-0.252	-3.092	-0.895	-57.583	-9.814
989	F3164-0533	-8.828	-0.353	-2.508	-0.919	-36.975	-10.639
990	F2636-0248	-8.828	-0.26	-3.843	-0.612	-46.846	-8.182
991	asinex7095	-8.827	-0.285	-3.164	-0.581	-49.815	-7.16
992	F3235-1000	-8.826	-0.285	-3.657	-0.554	-45.935	-8.432
993	F3235-0615	-8.825	-0.276	-2.849	-0.576	-42.267	-10.981
994	F2475-2910	-8.823	-0.276	-2.543	-0.895	-50.617	-8.492
995	F3289-0984	-8.823	-0.327	-2.49	-0.8	-41.096	-9.861
996	F2636-0325	-8.823	-0.259	-3.642	-0.613	-45.01	-8.549
997	F2013-0004	-8.822	-0.304	-2.772	-0.708	-43.408	-8.242
998	F0654-1387	-8.822	-0.315	-3.202	-0.78	-41.806	-9.643
999	F3235-0405	-8.818	-0.304	-3.211	-0.553	-37.699	-9.211
1000	F0654-1395	-8.818	-0.327	-2.862	-0.938	-41.759	-10.585
1001	F3289-1146	-8.817	-0.284	-2.702	-0.512	-43.756	-10.059
1002	F2013-0724	-8.817	-0.259	-2.78	-0.869	-45.083	-10.774
1003	F3235-0232	-8.816	-0.284	-3.012	-0.588	-43.922	-8.179
1004	F3235-0258	-8.816	-0.353	-2.725	-0.595	-42.356	-6.206
1005	F3289-0978	-8.815	-0.294	-2.606	-0.847	-44.91	-8.793
1006	F3289-0950	-8.815	-0.315	-2.367	-0.891	-41.776	-9.789
1007	asinex453	-8.814	-0.267	-3.644	-0.736	-46.684	-11.852
1008	F2636-0524	-8.814	-0.284	-3.485	-0.844	-38.965	-10.649
1009	F1342-0096	-8.814	-0.294	-1.93	-1.276	-44.003	-11.961
1010	F2542-1110	-8.814	-0.275	-3.017	-0.621	-49.695	-6.234
1011	F2582-0004	-8.813	-0.353	-3.03	-0.402	-41.358	-6.835
1012	F3235-0366	-8.813	-0.304	-2.876	-0.76	-42.105	-8.828
1013	F0648-0486	-8.812	-0.259	-3.211	-0.608	-55.391	-10.112
1014	F3124-0047	-8.812	-0.275	-3.064	-0.801	-42.448	-8.95
1015	F2013-0513	-8.812	-0.315	-3.057	-0.584	-44.912	-7.648
1016	F3289-0995	-8.811	-0.315	-2.512	-0.801	-41.707	-9.377
1017	F3382-5032	-8.81	-0.294	-3.818	-0.693	-50.061	-9.151
1018	F3382-5066	-8.81	-0.275	-3.772	-0.892	-49.588	-9.18
1019	F0570-0044	-8.81	-0.284	-2.911	-0.833	-46.685	-9.216
1020	irinapant (TL3271	-8.81	-0.152	-3.88	-0.269	-68.935	-8.717
1021	F3234-0926	-8.809	-0.284	-2.934	-0.735	-37.959	-12.237
1022	F3260-0465	-8.809	-0.315	-2.424	-0.93	-40.564	-10.233
1023	F3259-0257	-8.808	-0.419	-2.782	-0.881	-36.086	-7.46
1024	F2013-0660	-8.808	-0.294	-2.997	-0.566	-46.797	-8.516
1025	F2636-0214	-8.808	-0.304	-3.474	-0.657	-42.643	-8.302
1026	F2000-0549	-8.807	-0.284	-2.908	-0.619	-47.442	-6.963
1027	F3382-0911	-8.807	-0.245	-3.181	-1.144	-48.774	-10.866
1028	F3234-0929	-8.806	-0.294	-2.832	-0.883	-37.463	-12.479
1029	F2014-0673	-8.806	-0.284	-3.857	-0.596	-53.335	-9.551
1030	asinex7011	-8.805	-0.304	-2.364	-1.322	-43.755	-10.993
1031	F3289-0957	-8.805	-0.304	-2.54	-0.839	-42.798	-9.481
1032	F2013-0007	-8.805	-0.293	-3.05	-0.587	-45.55	-7.103
1033	F3164-0077	-8.804	-0.293	-2.568	-0.923	-41.12	-10.768
1034	F0648-0520	-8.804	-0.259	-3.053	-0.915	-56.625	-9.577
1035	asinex675	-8.803	-0.326	-3.086	-0.941	-36.655	-13.233
1036	F2583-0485	-8.803	-0.284	-2.531	-1.219	-38.692	-12.915
1037	F2636-0500	-8.803	-0.284	-3.813	-0.653	-43.814	-7.95
1038	F1167-0091	-8.802	-0.314	-2.475	-0.779	-44.642	-11.388
1039	F0648-0158	-8.802	-0.259	-3.43	-0.869	-58.483	-6.533
1040	F2636-0199	-8.801	-0.267	-3.66	-0.613	-45.51	-8.077
1041	F2013-0541	-8.8	-0.275	-3.148	-0.78	-44.467	-8.525
1042	F3235-0255	-8.8	-0.338	-3.184	-0.442	-44.603	-5.891
1043	F1603-0375	-8.799	-0.267	-3.398	-0.635	-54.749	-7.152
1044	F0912-3607	-8.799	-0.238	-3.501	-0.619	-54.406	-9.777
1045	F3259-0195	-8.798	-0.259	-2.688	-0.899	-45.842	-11.565
1046	F0654-1430	-8.797	-0.352	-2.986	-0.773	-45.456	-8.585
1047	F1289-0027	-8.792	-0.293	-2.996	-0.77	-40.621	-10.106
1048	F0648-0129	-8.791	-0.238	-3.179	-0.868	-55.139	-7.16
1049	F3234-1549	-8.791	-0.303	-3.398	-0.423	-48.548	-5.423
1050	F3382-5663	-8.79	-0.275	-3.829	-0.674	-49.428	-7.831
1051	F3164-0115	-8.79	-0.303	-2.862	-0.678	-41.972	-8.632
1052	F2692-0567	-8.789	-0.284	-4.105	-0.654	-54.349	-6.641
1053	F2542-1107	-8.789	-0.314	-2.977	-0.614	-46.871	-5.649
1054	asinex6971	-8.788	-0.418	-1.273	-1.351	-28.207	-16.382
1055	F2582-0202	-8.788	-0.283	-2.884	-0.764	-45.796	-9.796
1056	F3382-5659	-8.786	-0.258	-3.386	-0.881	-53.378	-9.76
1057	F0648-0408	-8.786	-0.251	-2.977	-0.868	-57.449	-9.855
1058	F0654-1393	-8.785	-0.314	-3.208	-0.802	-41.006	-9.069
1059	F2636-0297	-8.784	-0.258	-3.783	-0.666	-39.978	-9.08
1060	F3398-1396	-8.783	-0.314	-3.706	-0.587	-49.576	-6.777
1061	asinex7251	-8.78	-0.293	-4.191	-0.414	-38.326	-10.123
1062	F2013-0698	-8.778	-0.283	-3.1	-0.607	-46.507	-7.463
1063	F0579-0075	-8.777	-0.313	-2.967	-0.523	-46.819	-9.243
1064	F3235-1373	-8.777	-0.266	-2.647	-0.787	-47.462	-9.697
1065	F3235-0347	-8.777	-0.313	-2.893	-0.575	-45.11	-6.855
1066	asinex7031	-8.776	-0.283	-3.816	-0.541	-47.672	-9.264
1067	F0372-0417	-8.776	-0.313	-2.891	-0.789	-40.262	-11.655
1068	asinex533	-8.775	-0.283	-3.671	-0.573	-50.762	-6.31
1069	F3164-0116	-8.775	-0.274	-2.558	-0.922	-44.263	-10.978
1070	F3235-0006	-8.775	-0.266	-2.814	-0.856	-44.622	-9.396
1071	F3124-0454	-8.775	-0.266	-3.289	-0.511	-48.603	-7.113
1072	F2013-0080	-8.775	-0.274	-3.003	-0.508	-48.865	-7.439
1073	F3235-1258	-8.774	-0.274	-3.303	-0.793	-42.361	-11.688
1074	F0921-0789	-8.773	-0.313	-2.35	-0.79	-36.132	-12.158
1075	F0886-0015	-8.772	-0.258	-3.803	-0.602	-47.377	-7.609
1076	F3164-0235	-8.772	-0.302	-2.855	-0.844	-43.666	-7.696
1077	F2013-0091	-8.771	-0.313	-3.171	-0.528	-43.559	-5.809
1078	F0570-0303	-8.771	-0.283	-2.71	-0.831	-46.541	-8.563
1079	F3164-0240	-8.769	-0.302	-3.086	-0.687	-42.472	-8.25
1080	F1882-0182	-8.769	-0.251	-3.776	-0.672	-54.062	-6.73
1081	F3064-0121	-8.768	-0.302	-3.213	-0.657	-43.076	-7.611
1082	F3289-0991	-8.768	-0.313	-2.506	-0.797	-41.457	-9.512
1083	F2636-0361	-8.768	-0.292	-3.514	-0.705	-42.236	-9.051
1084	asinex196	-8.767	-0.302	-3.112	-0.868	-47.024	-9.891
1085	F1892-0145	-8.767	-0.258	-2.723	-0.596	-48.539	-9.218
1086	F3124-1148	-8.766	-0.283	-2.82	-0.807	-49.245	-8.238
1087	asinex593	-8.765	-0.292	-3.962	-0.644	-52.127	-6.205
1088	F2013-0684	-8.765	-0.325	-3.323	-0.428	-44.428	-5.514
1089	F2013-0137	-8.764	-0.266	-3.078	-0.658	-46.425	-8.371
1090	asinex7069	-8.762	-0.266	-3.243	-0.353	-50.809	-8.07
1091	F6529-2129	-8.762	-0.274	-3.124	-0.606	-47.91	-7.869
1092	F0886-0100	-8.761	-0.313	-2.747	-0.901	-43.025	-7.374
1093	F0679-0130	-8.76	-0.417	-2.289	-0.894	-37.538	-9.827
1094	F2583-0373	-8.759	-0.265	-2.907	-0.92	-43.861	-10.713
1095	F3234-1503	-8.759	-0.365	-2.788	-0.662	-35.371	-8.765
1096	F3235-1003	-8.758	-0.274	-2.58	-0.794	-44.338	-11.171
1097	F3164-0284	-8.757	-0.265	-2.965	-0.817	-48.412	-8.434
1098	F0612-0759	-8.757	-0.302	-3.888	-0.443	-49.89	-8.456
1099	F1889-0333	-8.756	-0.274	-3.612	-0.674	-48.298	-8.704
1100	F3406-2653	-8.756	-0.313	-3.434	-0.792	-43.897	-7.199
1101	F3235-1220	-8.756	-0.282	-3.093	-0.923	-42.746	-12.009
1102	asinex656	-8.755	-0.324	-3.489	-0.684	-45.835	-10.311
1103	asinex634	-8.755	-0.274	-3.735	-0.68	-49.953	-6.869
1104	F0654-1379	-8.755	-0.313	-3.675	-0.868	-48.793	-6.342
1105	F5257-0388	-8.755	-0.274	-3.562	-0.884	-43.287	-8.249
1106	F3124-1144	-8.755	-0.302	-2.518	-0.915	-43.436	-11.128
1107	F0654-1381	-8.754	-0.313	-3.229	-0.774	-41.562	-9.802
1108	asinex8352	-8.753	-0.265	-3.294	-0.693	-47.645	-10.685
1109	F2692-0494	-8.753	-0.265	-4.067	-0.65	-55.486	-6.788
1110	F2013-0539	-8.753	-0.337	-3.119	-0.505	-41.664	-6.968
1111	F3164-0118	-8.753	-0.265	-2.563	-0.922	-45.094	-10.937
1112	F3234-0542	-8.752	-0.265	-2.152	-0.897	-44.385	-14.9
1113	F3235-0259	-8.75	-0.337	-3.022	-0.456	-42.797	-5.169
1114	F3064-0144	-8.749	-0.302	-2.843	-0.922	-35.784	-11.716
1115	F0886-0040	-8.749	-0.273	-3.383	-0.731	-45.055	-8.233
1116	F3124-0999	-8.748	-0.302	-2.975	-0.908	-40.099	-7.684
1117	F3289-0956	-8.747	-0.302	-2.628	-0.771	-42.765	-9.454
1118	F3235-0352	-8.746	-0.273	-3.182	-0.588	-46.074	-7.259
1119	asinex4709	-8.745	-0.273	-2.849	-0.794	-46.06	-15.206
1120	F3234-0141	-8.745	-0.302	-2.452	-0.799	-42.689	-9.257
1121	F0570-0049	-8.744	-0.312	-2.938	-0.808	-45.562	-7.824
1122	asinex719	-8.742	-0.312	-3.418	-0.745	-44.724	-12.037
1123	F0580-0386	-8.742	-0.243	-3.778	-0.663	-56.664	-7.094
1124	F2000-0607	-8.741	-0.282	-2.861	-0.769	-36.47	-11.944
1125	F3235-0267	-8.74	-0.312	-3.126	-0.469	-46.87	-5.397
1126	F0579-0126	-8.739	-0.291	-4.025	-0.461	-49.794	-8.894
1127	F3164-0119	-8.739	-0.265	-2.575	-0.917	-44.506	-11.079
1128	F3235-0884	-8.738	-0.35	-3.095	-0.457	-42.867	-4.781
1129	F2437-0099	-8.738	-0.301	-2.901	-0.931	-43.853	-11.613
1130	F3259-0170	-8.736	-0.265	-3.817	-0.532	-48.894	-7.165
1131	F3164-0594	-8.736	-0.291	-2.595	-0.87	-40.774	-9.06
1132	F3382-5633	-8.736	-0.273	-4.149	-0.584	-53.34	-8.108
1133	F2013-0875	-8.736	-0.25	-3.027	-0.659	-45.219	-9.665
1134	F3289-0951	-8.736	-0.312	-2.562	-0.767	-42.542	-8.642
1135	F3353-0452	-8.735	-0.38	-2.514	-0.612	-39.402	-6.303
1136	F3382-0905	-8.735	-0.243	-3.318	-1.173	-47.88	-11.631
1137	asinex720	-8.734	-0.301	-3.838	-0.76	-45.319	-10.822
1138	F2013-0877	-8.732	-0.249	-2.811	-0.616	-48.131	-9.086
1139	F2636-0196	-8.732	-0.265	-3.764	-0.599	-46.516	-7.949
1140	F0372-0042	-8.731	-0.323	-1.921	-0.977	-43.173	-10.585
1141	F2636-0062	-8.731	-0.336	-1.967	-1.176	-35.827	-12.174
1142	F1602-0036	-8.731	-0.243	-3.785	-0.762	-50.178	-11.868
1143	asinex7073	-8.73	-0.265	-3.3	-0.618	-48.343	-8.721
1144	F0372-0790	-8.73	-0.38	-2.908	-0.514	-38.162	-7.3
1145	F3235-0622	-8.73	-0.265	-2.726	-0.618	-48.187	-8.96
1146	F2542-1441	-8.73	-0.312	-2.795	-0.791	-40.778	-8.077
1147	asinex7012	-8.729	-0.291	-3.31	-0.556	-46.825	-8.202
1148	F1891-0594	-8.729	-0.301	-2.682	-0.697	-39.083	-10.991
1149	F3235-1406	-8.729	-0.323	-2.804	-0.58	-45.552	-6.147
1150	F3164-0579	-8.729	-0.336	-2.555	-0.815	-39.36	-8.686
1151	F1608-0607	-8.729	-0.273	-3.637	-0.94	-49.073	-11.663
1152	F5257-0467	-8.728	-0.273	-3.508	-0.64	-50.66	-7.715
1153	F3407-1880	-8.728	-0.257	-3.335	-0.559	-51.693	-8.517
1154	F0648-0364	-8.727	-0.257	-3.395	-0.868	-57.325	-6.41
1155	F1051-0071	-8.727	-0.364	-2.812	-0.797	-35.629	-10.274
1156	F3260-0021	-8.726	-0.416	-2.228	-0.93	-31.981	-9.326
1157	F2013-0665	-8.726	-0.257	-3.131	-0.593	-46.6	-7.863
1158	F3289-0965	-8.726	-0.301	-2.392	-0.898	-43.457	-8.87
1159	F2013-0530	-8.725	-0.273	-2.444	-0.925	-44.441	-11.083
1160	F1468-0114	-8.724	-0.364	-2.824	-0.833	-37.877	-9.064
1161	F0654-1396	-8.723	-0.312	-3.402	-0.895	-48.171	-6.432
1162	F3124-0186	-8.722	-0.264	-3.222	-0.564	-45.092	-9.225
1163	F5046-0127	-8.722	-0.301	-3.205	-1.313	-41.778	-10.455
1164	F3124-0275	-8.721	-0.281	-2.954	-0.893	-40.797	-11.628
1165	F3234-0924	-8.721	-0.301	-2.677	-0.845	-35.723	-12.664
1166	F0918-4401	-8.72	-0.436	-2.177	-0.931	-29.809	-10.587
1167	F0570-0378	-8.72	-0.301	-2.469	-0.795	-42.437	-11.376
1168	F2013-0444	-8.72	-0.264	-2.689	-0.833	-48.334	-10.064
1169	F3164-0596	-8.72	-0.281	-2.55	-0.851	-44.63	-8.179
1170	F6513-3736	-8.717	-0.281	-3.054	-0.611	-51.088	-5.789
1171	asinex4993	-8.716	-0.349	-1.82	-0.819	-36.675	-12.214
1172	F3058-0097	-8.715	-0.272	-4.631	-0.242	-54.094	-3.762
1173	F2013-0722	-8.714	-0.311	-2.898	-0.538	-41.597	-8.448
1174	asinex483	-8.713	-0.3	-3.846	-0.638	-48.758	-6.248
1175	F2636-0276	-8.712	-0.256	-3.725	-0.613	-45.527	-8.194
1176	F0654-1375	-8.712	-0.323	-3.137	-0.786	-40.676	-9.318
1177	F1889-0210	-8.712	-0.256	-2.697	-0.803	-47.441	-9.809
1178	F1167-0121	-8.711	-0.29	-3.895	-0.841	-46.606	-7.509
1179	F3235-0825	-8.71	-0.264	-3.452	-0.867	-42.247	-10.663
1180	F0886-0013	-8.709	-0.311	-2.912	-0.7	-38.369	-8.582
1181	F2000-0326	-8.709	-0.335	-2.687	-0.71	-41.16	-7.933
1182	F3234-1300	-8.708	-0.379	-2.657	-0.755	-36.002	-7.937
1183	F1082-0142	-8.708	-0.242	-2.372	-0.976	-44.966	-14.916
1184	F2542-1506	-8.708	-0.264	-2.87	-0.746	-47.555	-8.762
1185	F3235-0112	-8.707	-0.256	-2.538	-0.794	-49.273	-9.771
1186	F2013-0715	-8.707	-0.29	-2.951	-0.626	-43.986	-8.242
1187	F3124-1000	-8.706	-0.3	-2.598	-0.914	-41.098	-8.555
1188	F1191-0073	-8.706	-0.335	-2.08	-1.153	-30.297	-13.143
1189	asinex7261	-8.705	-0.272	-4.455	-0.4	-40.385	-10.379
1190	F2013-0865	-8.705	-0.272	-2.969	-0.611	-41.602	-10.499
1191	F3235-1213	-8.704	-0.281	-3.293	-0.791	-39.589	-11.579
1192	F2636-0125	-8.702	-0.335	-1.931	-1.285	-34.119	-12.548
1193	F2013-0468	-8.701	-0.281	-2.898	-0.836	-39.902	-10.478
1194	F2636-0521	-8.7	-0.272	-3.213	-0.933	-41.994	-11.365
1195	F0648-0547	-8.699	-0.272	-3.794	-0.871	-50.825	-7.254
1196	F2542-1323	-8.699	-0.264	-3.12	-0.846	-45.264	-8.521
1197	F3289-0959	-8.698	-0.3	-2.471	-0.794	-41.761	-9.771
1198	F2013-0725	-8.698	-0.264	-2.697	-0.899	-41.453	-11.322
1199	F3235-1001	-8.697	-0.272	-3.494	-0.539	-49.809	-8.994
1200	F3164-0574	-8.697	-0.322	-2.711	-0.783	-39.99	-8.174
1201	F2636-0583	-8.695	-0.235	-3.835	-0.659	-44.988	-9.383
1202	F2692-0057	-8.694	-0.272	-3.957	-0.648	-53.909	-7.273
1203	F3235-0361	-8.693	-0.272	-2.98	-0.567	-44.973	-7.715
1204	F3234-0093	-8.693	-0.263	-2.096	-0.897	-46.411	-13.716
1205	F0570-0387	-8.693	-0.235	-3.722	-0.618	-48.572	-8.268
1206	F2013-0511	-8.692	-0.272	-2.589	-0.859	-43.971	-10.489
1207	F1873-0775	-8.691	-0.31	-3.046	-0.778	-39.569	-10.728
1208	F1342-0092	-8.691	-0.28	-2.64	-0.931	-44.222	-10.004
1209	F0922-0796	-8.69	-0.202	-2.542	-1.161	-54.105	-14.32
1210	F1687-0071	-8.69	-0.31	-3.198	-0.703	-40.298	-10.27
1211	F2636-0250	-8.69	-0.256	-3.737	-0.613	-46.85	-8.178
1212	F1191-0084	-8.689	-0.334	-2.008	-1.251	-37.189	-11.444
1213	F3259-0166	-8.689	-0.28	-3.293	-0.783	-44.695	-7.356
1214	asinex7167	-8.688	-0.31	-3.333	-0.671	-38.9	-10.131
1215	F0648-0463	-8.688	-0.28	-2.978	-0.846	-50.842	-8.27
1216	F3289-0993	-8.687	-0.31	-2.441	-0.791	-41.374	-9.212
1217	F3124-0982	-8.687	-0.3	-3.216	-0.763	-43.029	-5.915
1218	F0654-0786	-8.687	-0.3	-2.844	-0.78	-42.378	-8.788
1219	F3124-0353	-8.686	-0.322	-2.343	-0.793	-36.273	-11.103
1220	F0579-0254	-8.685	-0.29	-3.761	-0.529	-52.33	-9.042
1221	F3235-0280	-8.685	-0.271	-2.77	-0.573	-42.111	-11.261
1222	F0721-0551	-8.685	-0.207	-3.687	-0.32	-60.284	-7.039
1223	asinex622	-8.684	-0.31	-3.356	-0.805	-44.228	-10.852
1224	F2013-0504	-8.684	-0.31	-2.789	-0.65	-42.771	-8.083
1225	F2542-1344	-8.684	-0.263	-3.09	-0.836	-44.413	-8.864
1226	F1614-0108	-8.683	-0.299	-3.318	-1.133	-43.885	-9.981
1227	F2636-0226	-8.682	-0.255	-3.764	-0.653	-43.981	-8.258
1228	F3164-0595	-8.682	-0.28	-2.568	-0.874	-44.231	-8.651
1229	F3406-2619	-8.682	-0.322	-3.296	-0.792	-43.055	-7.337
1230	F2636-0399	-8.682	-0.255	-3.794	-0.643	-48.395	-8.213
1231	F2013-0690	-8.681	-0.322	-3.29	-0.269	-46.516	-5.315
1232	F3259-0182	-8.681	-0.31	-2.412	-0.698	-39.629	-10.101
1233	F0570-0098	-8.679	-0.299	-3.049	-0.663	-45.567	-8.236
1234	F2013-0694	-8.678	-0.289	-2.831	-0.619	-44.145	-8.168
1235	F0018-0514	-8.678	-0.212	-3.57	-0.707	-48.272	-8.636
1236	F3235-1239	-8.677	-0.271	-2.99	-0.807	-34.614	-12.746
1237	F1607-0980	-8.676	-0.255	-3.844	-0.651	-58.639	-7.218
1238	F2636-0456	-8.676	-0.28	-3.371	-0.838	-46.343	-9.36
1239	F2013-0542	-8.675	-0.28	-3.024	-0.71	-40.133	-9.665
1240	F2013-0717	-8.675	-0.299	-2.679	-0.866	-43.798	-7.896
1241	F3260-0566	-8.675	-0.31	-2.622	-0.796	-40.138	-10.834
1242	F2014-0624	-8.675	-0.28	-3.376	-0.677	-50.395	-11.838
1243	F0648-0445	-8.675	-0.271	-4.001	-0.875	-52.24	-6.282
1244	F0648-0488	-8.675	-0.255	-3.09	-0.869	-53.197	-10.19
1245	asinex7491	-8.674	-0.271	-4.45	-0.388	-48.567	-4.937
1246	F2542-0772	-8.674	-0.271	-2.886	-0.657	-46.978	-8.407
1247	F2636-0515	-8.674	-0.248	-3.751	-0.681	-41.246	-9.777
1248	F0666-1475	-8.672	-0.222	-4.314	-0.618	-59.917	-7.062
1249	asinex6141	-8.671	-0.28	-2.829	-0.923	-41.502	-15.129
1250	F3382-5061	-8.671	-0.263	-3.842	-0.788	-50.067	-9.747
1251	F3407-1883	-8.67	-0.211	-2.856	-0.567	-62.823	-7.581
1252	F1174-3077	-8.67	-0.289	-4.218	-0.106	-54.401	-5.258
1253	asinex5918	-8.669	-0.333	-3.161	-0.941	-40.578	-11.876
1254	F3124-0706	-8.669	-0.299	-2.323	-0.794	-39.268	-10.767
1255	F3234-0842	-8.669	-0.299	-2.47	-0.822	-46.701	-9.119
1256	asinex725	-8.668	-0.289	-4.214	-0.589	-44.878	-6.949
1257	F0580-0387	-8.668	-0.248	-3.798	-0.59	-58.021	-6.036
1258	F2636-0327	-8.668	-0.255	-3.655	-0.596	-46.342	-8.133
1259	F3124-1145	-8.668	-0.289	-2.394	-0.826	-48.26	-10.12
1260	F1191-0027	-8.667	-0.255	-3.572	-0.747	-42.89	-8.665
1261	F3259-0194	-8.667	-0.263	-3.137	-0.545	-46.631	-9.006
1262	F3235-1301	-8.665	-0.28	-2.778	-0.816	-38.12	-10.335
1263	F2013-0518	-8.665	-0.271	-2.822	-0.62	-46.423	-8.638
1264	F2692-0802	-8.665	-0.263	-4.276	-0.554	-54.452	-6.807
1265	F3289-0953	-8.665	-0.299	-2.764	-0.595	-45.198	-7.405
1266	F2013-0901	-8.664	-0.263	-2.644	-0.923	-42.439	-10.665
1267	F2692-0723	-8.664	-0.299	-4.082	-0.613	-49.041	-7.431
1268	F3165-1300	-8.664	-0.263	-3.245	-0.83	-52.098	-9.276
1269	F2013-0659	-8.663	-0.299	-3.196	-0.468	-47.829	-5.228
1270	F3259-0191	-8.663	-0.271	-2.463	-0.899	-42.853	-11.185
1271	F0570-0338	-8.662	-0.262	-2.704	-0.925	-44.97	-9.458
1272	F3234-1571	-8.662	-0.262	-3.157	-0.392	-50.821	-6.325
1273	F2542-0972	-8.661	-0.309	-2.868	-0.783	-34.278	-10.766
1274	F3124-0141	-8.661	-0.271	-3.085	-0.929	-42.304	-12.096
1275	F2013-0666	-8.661	-0.255	-2.802	-0.633	-44.708	-10.015
1276	F0654-1509	-8.661	-0.309	-3.058	-0.775	-42.656	-9.794
1277	F0570-0091	-8.661	-0.309	-2.841	-0.692	-41.955	-11.421
1278	asinex4675	-8.66	-0.361	-2.923	-1.102	-32.53	-15.72
1279	asinex5554	-8.66	-0.279	-2.681	-1.148	-43.524	-14.202
1280	F1191-0034	-8.66	-0.299	-3.27	-0.532	-43.386	-8.59
1281	F3406-2636	-8.66	-0.279	-3.556	-0.794	-46.536	-7.131
1282	F2583-0371	-8.659	-0.255	-2.701	-0.93	-41.526	-12.722
1283	F0801-0025	-8.658	-0.333	-2.838	-0.822	-37.186	-10.259
1284	F2013-0509	-8.657	-0.279	-2.765	-0.621	-45.456	-8.454
1285	F0654-1542	-8.657	-0.299	-3.005	-0.775	-46.004	-8.247
1286	F2015-0011	-8.657	-0.346	-2.271	-0.813	-45.546	-11.311
1287	F3259-0166	-8.657	-0.279	-2.5	-0.807	-42.228	-11.29
1288	F2013-0905	-8.657	-0.271	-3.084	-0.554	-45.503	-7.976
1289	F2692-0786	-8.656	-0.262	-3.853	-0.617	-54.05	-8.038
1290	F2582-0005	-8.656	-0.333	-2.633	-0.639	-41.703	-7.988
1291	F0920-0839	-8.656	-0.298	-2.594	-0.786	-37.836	-11.897
1292	F3235-0214	-8.656	-0.333	-3.1	-0.398	-43.78	-6.01
1293	F3235-0286	-8.655	-0.309	-3.169	-0.456	-46.488	-5.344
1294	F0886-0103	-8.655	-0.321	-2.77	-0.699	-40.34	-8.863
1295	F0579-0284	-8.655	-0.288	-3.827	-0.588	-54.872	-7.684
1296	F3235-0696	-8.654	-0.262	-2.805	-0.756	-44.37	-8.496
1297	F3289-0919	-8.654	-0.309	-2.718	-0.791	-43.007	-8.698
1298	asinex2361	-8.653	-0.24	-2.781	-0.822	-44.696	-13.023
1299	F3260-0461	-8.653	-0.32	-2.282	-0.868	-42.605	-8.591
1300	F1468-0078	-8.652	-0.376	-2.648	-0.835	-36.287	-9.026
1301	F2013-0699	-8.652	-0.279	-2.843	-0.692	-44.869	-8.381
1302	F2013-0897	-8.652	-0.309	-2.745	-0.861	-41.357	-7.386
1303	F3164-0555	-8.652	-0.288	-2.652	-0.834	-40.972	-11.374
1304	F3259-0372	-8.652	-0.32	-2.417	-0.923	-36.186	-10.318
1305	F2636-0576	-8.651	-0.27	-3.484	-0.474	-46.256	-7.657
1306	F2542-1136	-8.651	-0.27	-2.826	-0.648	-47.484	-8.259
1307	F3260-0077	-8.651	-0.254	-3.999	-0.734	-49.802	-9.258
1308	F5257-0449	-8.651	-0.279	-3.613	-0.648	-48.031	-7.801
1309	F1608-0698	-8.651	-0.279	-3.622	-0.825	-46.989	-9.224
1310	F3064-0249	-8.651	-0.309	-2.517	-0.798	-36.98	-12.122
1311	F3289-0954	-8.651	-0.298	-2.727	-0.901	-42.251	-8.691
1312	F1891-0621	-8.65	-0.262	-2.741	-0.852	-37.994	-12.524
1313	F1191-0051	-8.65	-0.298	-2.148	-0.766	-44.056	-9.791
1314	F0654-1377	-8.65	-0.309	-3.184	-0.787	-40.934	-8.894
1315	F1798-0151	-8.65	-0.262	-4.066	-0.613	-46.242	-7.567
1316	F0580-0481	-8.647	-0.247	-4.198	-0.461	-57.745	-4.014
1317	F2013-0182	-8.646	-0.36	-2.989	-0.468	-40.969	-4.832
1318	F3235-0634	-8.646	-0.262	-2.841	-0.931	-39.679	-11.837
1319	F3235-0351	-8.646	-0.27	-2.866	-0.655	-47.408	-7.859
1320	F2636-0331	-8.645	-0.247	-3.271	-0.667	-43.936	-9.567
1321	F3260-0047	-8.645	-0.376	-2.8	-0.833	-36.749	-8.611
1322	F3164-0565	-8.644	-0.298	-2.881	-0.644	-40.415	-10.028
1323	F1609-0492	-8.644	-0.254	-4.114	-0.617	-55.365	-7.053
1324	F3235-0992	-8.644	-0.32	-2.874	-0.687	-42.673	-9.007
1325	F3235-1153	-8.643	-0.262	-2.73	-0.795	-46.447	-9.791
1326	F3260-0826	-8.642	-0.309	-2.472	-0.823	-44.419	-8.319
1327	F0887-0106	-8.642	-0.309	-2.475	-0.782	-36.382	-11.531
1328	F2475-0051	-8.642	-0.298	-3.403	-0.525	-46.084	-6.217
1329	F3235-1366	-8.64	-0.27	-2.648	-0.779	-42.8	-10.811
1330	F2636-0632	-8.637	-0.32	-1.931	-1.332	-35.111	-13.411
1331	F3259-0490	-8.637	-0.376	-2.818	-0.832	-35.852	-8.825
1332	F2636-0167	-8.637	-0.345	-1.796	-1.328	-32.839	-13.069
1333	F3260-0690	-8.636	-0.36	-2.817	-0.829	-36.283	-9.015
1334	F2014-0631	-8.636	-0.288	-3.089	-0.658	-51.173	-9.683
1335	asinex7023	-8.634	-0.308	-2.452	-1.33	-40.182	-12.799
1336	F3382-5059	-8.634	-0.279	-3.885	-0.628	-51.237	-8.876
1337	F3382-5662	-8.634	-0.279	-3.842	-0.582	-50.779	-7.688
1338	F2692-0327	-8.634	-0.262	-3.696	-0.667	-58.039	-7.25
1339	F3259-0186	-8.633	-0.262	-2.53	-0.724	-43.337	-11.237
1340	F2013-0874	-8.633	-0.254	-3.111	-0.483	-49.689	-7.073
1341	F3382-0564	-8.633	-0.247	-3.86	-0.396	-49.501	-10.451
1342	F3235-0688	-8.632	-0.288	-2.769	-0.791	-41.974	-7.935
1343	F2013-0272	-8.632	-0.345	-2.772	-0.612	-36.936	-7.095
1344	F2636-0432	-8.631	-0.298	-3.024	-0.683	-42.043	-9.061
1345	F0648-0489	-8.63	-0.254	-3.421	-0.608	-57.588	-8.764
1346	F1532-0009	-8.63	-0.332	-2.631	-0.794	-38.298	-10.205
1347	F3260-0462	-8.63	-0.308	-2.955	-0.591	-43.142	-9.549
1348	F2542-1483	-8.63	-0.288	-2.501	-0.786	-44.524	-9.202
1349	F2013-0713	-8.63	-0.308	-3.068	-0.46	-42.746	-6.859
1350	asinex671	-8.629	-0.278	-4.07	-0.631	-45.742	-8.889
1351	F2013-0031	-8.628	-0.27	-2.925	-0.628	-48.313	-8.62
1352	F0068-0066	-8.628	-0.308	-2.943	-0.777	-39.011	-9.417
1353	F2542-1682	-8.628	-0.32	-2.271	-0.795	-38.455	-11.188
1354	F2013-0869	-8.628	-0.288	-3.184	-0.464	-48.776	-5.46
1355	F2013-0446	-8.628	-0.261	-2.702	-0.797	-47.107	-9.028
1356	F0886-0118	-8.626	-0.27	-3.665	-0.599	-45.239	-7.906
1357	asinex8422	-8.622	-0.261	-3.294	-0.443	-50.038	-9.343
1358	F2542-0566	-8.621	-0.269	-3.418	-0.805	-41.312	-10.96
1359	F2636-0103	-8.62	-0.308	-2.331	-0.92	-38.25	-13.292
1360	F3259-0226	-8.619	-0.308	-3.337	-0.401	-44.986	-7.151
1361	F0612-0209	-8.618	-0.308	-3.174	-0.834	-47.058	-12.437
1362	F1889-0577	-8.618	-0.269	-3.494	-0.509	-48.024	-8.65
1363	F2636-0422	-8.618	-0.253	-3.912	-0.616	-48.101	-6.463
1364	F3235-1248	-8.618	-0.269	-3.268	-0.791	-40.354	-11.449
1365	F0886-0014	-8.617	-0.331	-2.174	-0.927	-33.35	-11.362
1366	F0886-0087	-8.617	-0.261	-3.286	-0.639	-48.283	-7.519
1367	F3406-2623	-8.616	-0.308	-3.677	-0.865	-44.978	-6.345
1368	F2013-0730	-8.614	-0.297	-3.038	-0.456	-44.323	-7.908
1369	F2013-0465	-8.613	-0.308	-2.643	-0.738	-38.646	-8.504
1370	F2636-0499	-8.613	-0.287	-3.431	-0.775	-41.567	-8.903
1371	F2542-0382	-8.613	-0.319	-3.108	-0.543	-44.979	-4.763
1372	F0570-0048	-8.611	-0.297	-2.918	-0.658	-46.93	-7.977
1373	F1614-0029	-8.611	-0.319	-3.368	-0.606	-41.015	-7.191
1374	F3234-0079	-8.61	-0.269	-2.391	-0.901	-49.01	-9.198
1375	F1699-0011	-8.61	-0.359	-2.667	-0.83	-36.635	-8.802
1376	asinex224	-8.609	-0.261	-3.506	-0.868	-50.382	-9.429
1377	F3260-0168	-8.609	-0.319	-2.669	-0.835	-41.895	-10.05
1378	F3164-0078	-8.609	-0.278	-2.606	-0.923	-42.06	-11.236
1379	F0580-0104	-8.609	-0.253	-4.107	-0.596	-55.172	-5.66
1380	F0654-1426	-8.608	-0.344	-2.974	-0.804	-41.161	-9.405
1381	F0570-0364	-8.607	-0.307	-2.335	-0.928	-42.61	-9.034
1382	F3406-2626	-8.607	-0.307	-3.496	-0.795	-43.976	-6.831
1383	F2013-0085	-8.607	-0.261	-3.046	-0.505	-47.706	-7.26
1384	F2669-0130	-8.607	-0.319	-3.705	-0.613	-41.883	-5.094
1385	F0886-0076	-8.607	-0.297	-3.113	-1.156	-43.218	-9.256
1386	asinex257	-8.606	-0.307	-3.557	-0.873	-43.744	-10.657
1387	F3234-0360	-8.606	-0.269	-3.927	-0.208	-48.445	-4.99
1388	F3001-0034	-8.605	-0.319	-3.05	-0.773	-40.884	-7.348
1389	F3001-0035	-8.603	-0.307	-3.273	-0.622	-42.4	-7.572
1390	F0648-0428	-8.603	-0.278	-3.423	-0.871	-52.123	-7.6
1391	asinex660	-8.602	-0.261	-3.593	-0.621	-45.284	-8.529
1392	815853-R-162	-8.602	-0.374	-2.982	-0.879	-38.023	-45.591
1393	F1532-0013	-8.602	-0.287	-2.907	-0.84	-45.426	-11.118
1394	F3124-0623	-8.602	-0.261	-2.608	-0.864	-46.098	-8.493
1395	F2636-0503	-8.601	-0.297	-3.515	-0.644	-41.619	-7.591
1396	F3260-0152	-8.601	-0.307	-2.37	-0.928	-39.651	-10.982
1397	F0648-0479	-8.6	-0.246	-3.388	-0.873	-56.575	-7.136
1398	F2013-0501	-8.6	-0.358	-2.756	-0.519	-37.048	-8.372
1399	F3398-1388	-8.6	-0.277	-3.808	-0.593	-53.192	-6.316
1400	F2583-0365	-8.6	-0.287	-2.605	-0.942	-39.178	-10.776
1401	asinex6072	-8.599	-0.331	-2.645	-0.887	-41.136	-11.033
1402	F2636-0610	-8.599	-0.331	-1.785	-1.302	-36.015	-12.066
1403	F2013-0474	-8.599	-0.277	-2.752	-0.883	-40.056	-10.326
1404	F1167-0083	-8.599	-0.287	-3.568	-0.607	-48.572	-6.774
1405	F0372-0598	-8.598	-0.374	-2.572	-0.878	-34.224	-8.983
1406	F2013-0871	-8.598	-0.239	-3.074	-0.548	-52.892	-6.703
1407	F2636-0514	-8.598	-0.253	-3.77	-0.662	-42.563	-9.441
1408	F2636-0528	-8.596	-0.287	-3.219	-0.66	-38.981	-11.102
1409	F1607-0432	-8.596	-0.246	-3.877	-0.613	-61.49	-6.457
1410	F2542-1703	-8.596	-0.296	-2.286	-0.802	-45.319	-9.325
1411	F0654-1380	-8.596	-0.307	-2.985	-0.922	-39.651	-9.496
1412	815853-R-155	-8.594	-0.374	-2.426	-0.707	-36.944	-44.455
1413	F3259-0156	-8.594	-0.331	-2.26	-0.823	-36.912	-10.524
1414	F3164-0587	-8.593	-0.286	-2.459	-0.813	-47.526	-8.729
1415	F2542-0707	-8.593	-0.318	-2.308	-0.843	-37.459	-9.741
1416	F2542-1714	-8.593	-0.307	-2.483	-0.795	-38.771	-10.628
1417	F3376-1674	-8.593	-0.409	-2.235	-0.779	-30.347	-10.541
1418	F3235-0607	-8.592	-0.296	-3.394	-0.358	-47.628	-4.401
1419	F1352-0037	-8.592	-0.344	-2.768	-0.77	-34.351	-8.924
1420	F3259-0142	-8.592	-0.277	-2.959	-0.7	-41.893	-9.167
1421	F2636-0401	-8.592	-0.253	-3.862	-0.648	-48.041	-7.913
1422	F1614-0291	-8.592	-0.245	-3.587	-0.657	-44.525	-7.922
1423	F2636-0393	-8.591	-0.253	-3.749	-0.613	-48.565	-8.092
1424	F2013-0277	-8.591	-0.286	-2.528	-0.76	-40.235	-8.849
1425	F3144-0069	-8.59	-0.296	-2.509	-0.798	-37.404	-12.071
1426	F3235-1271	-8.589	-0.268	-3.051	-0.918	-42.819	-11.591
1427	F2013-0545	-8.588	-0.277	-3.205	-0.587	-47.679	-5.807
1428	F0580-0379	-8.588	-0.26	-3.94	-0.594	-52.085	-5.973
1429	F3260-0440	-8.588	-0.358	-2.19	-0.803	-35.341	-8.245
1430	F1873-0800	-8.588	-0.286	-3.08	-0.631	-46.618	-6.677
1431	F3260-0287	-8.588	-0.286	-2.378	-0.926	-44.286	-12.704
1432	F2583-0492	-8.586	-0.245	-2.877	-0.924	-41.965	-11.424
1433	F3235-0494	-8.586	-0.373	-2.687	-0.552	-36.596	-7.772
1434	asinex120	-8.585	-0.26	-3.708	-0.838	-54.437	-4.605
1435	F0403-0023	-8.584	-0.307	-2.475	-0.782	-36.792	-11.644
1436	F2437-0225	-8.584	-0.296	-2.689	-1.142	-40.151	-11.18
1437	F2013-0389	-8.583	-0.268	-2.721	-0.788	-47.17	-8.313
1438	F2636-0345	-8.583	-0.252	-3.627	-0.6	-46.105	-6.439
1439	F3406-6591	-8.582	-0.277	-2.25	-0.929	-50.268	-9.677
1440	F2013-0667	-8.582	-0.252	-2.833	-0.582	-45.322	-9.359
1441	F2437-0290	-8.582	-0.277	-2.871	-1.228	-44.263	-10.533
1442	F3289-1149	-8.582	-0.286	-3.376	-0.25	-46.422	-6.341
1443	F3406-1602	-8.581	-0.268	-3.57	-0.819	-53.689	-6.465
1444	F3235-1002	-8.581	-0.268	-2.909	-0.617	-47.265	-7.886
1445	F3124-0354	-8.581	-0.306	-2.233	-0.794	-40.882	-10.233
1446	F3235-1358	-8.58	-0.296	-2.502	-0.791	-44.348	-9.337
1447	F5257-0605	-8.579	-0.268	-2.713	-0.919	-43.008	-9.735
1448	F1607-0426	-8.578	-0.26	-3.987	-0.639	-53.428	-7.674
1449	asinex8354	-8.576	-0.26	-3.256	-0.343	-49.975	-8.234
1450	F3235-1380	-8.576	-0.238	-2.665	-0.779	-45.161	-11.243
1451	F3243-0891	-8.576	-0.26	-4.679	-0.266	-50.966	-3.302
1452	F1717-0018	-8.576	-0.232	-4.142	-0.909	-48.407	-8.595
1453	F0373-0973	-8.575	-0.343	-3.14	-0.819	-40.985	-9.351
1454	F1609-0919	-8.574	-0.296	-3.615	-0.613	-46.3	-7.415
1455	F0068-0065	-8.574	-0.318	-2.484	-0.929	-37.877	-9.762
1456	F3062-0316	-8.573	-0.277	-3.412	-0.714	-50.36	-5.961
1457	F0372-0316	-8.573	-0.39	-2.69	-0.85	-33.345	-9.725
1458	F2013-0521	-8.572	-0.296	-2.77	-0.644	-42.73	-8.3
1459	F1167-0072	-8.572	-0.33	-2.762	-0.929	-37.132	-11.022
1460	F3260-0772	-8.571	-0.306	-2.813	-0.797	-39.669	-9.652
1461	F0372-0416	-8.569	-0.317	-2.981	-0.731	-39.147	-9.198
1462	F2233-0426	-8.569	-0.286	-2.801	-0.928	-46.459	-10.639
1463	F3260-0170	-8.569	-0.317	-2.213	-0.909	-41.689	-8.593
1464	F0653-0481	-8.569	-0.268	-3.722	-0.346	-51.381	-7.601
1465	asinex7272	-8.568	-0.295	-4.119	-0.481	-38.218	-9.758
1466	F0654-0279	-8.568	-0.286	-2.919	-0.698	-39.94	-9.642
1467	F0648-0089	-8.567	-0.295	-3.522	-0.869	-49.334	-6.803
1468	F2013-0276	-8.566	-0.329	-2.782	-0.846	-31.606	-10.257
1469	F3259-0443	-8.564	-0.306	-3.186	-0.622	-42.601	-8.213
1470	F0018-0513	-8.563	-0.204	-3.116	-0.918	-49.025	-9.671
1471	F3289-1034	-8.563	-0.276	-2.627	-0.795	-42.736	-11.052
1472	F3376-1630	-8.563	-0.408	-2.383	-0.83	-31.79	-10.08
1473	F0579-0065	-8.563	-0.343	-3.208	-0.516	-43.453	-10.284
1474	F2692-0573	-8.563	-0.295	-4.003	-0.612	-50.486	-6.687
1475	F3406-2620	-8.563	-0.285	-3.396	-0.797	-44.652	-6.9
1476	F0554-0154	-8.562	-0.276	-3.182	-0.613	-54.542	-12.336
1477	F0372-0487	-8.562	-0.285	-3.572	-0.648	-46.873	-8.069
1478	F1614-0154	-8.562	-0.306	-3.349	-0.847	-41.703	-11.007
1479	F3235-1287	-8.561	-0.276	-3.026	-0.459	-50.193	-5.341
1480	F3259-0155	-8.56	-0.329	-2.157	-0.796	-36.714	-10.383
1481	F3234-1380	-8.56	-0.276	-3.038	-0.931	-40.149	-11.438
1482	F5047-0324	-8.56	-0.276	-2.311	-0.917	-41.521	-11.198
1483	F2085-0212	-8.56	-0.259	-3.815	-0.644	-49.869	-6.372
1484	F2589-1316	-8.559	-0.259	-2.678	-0.787	-43.035	-9.435
1485	F1607-1059	-8.559	-0.252	-3.814	-0.593	-58.073	-7.106
1486	F3289-0999	-8.558	-0.306	-2.321	-0.794	-40.904	-9.849
1487	F0648-0424	-8.557	-0.276	-3.481	-0.869	-50.708	-6.652
1488	F0648-0350	-8.557	-0.276	-3.02	-0.894	-48.972	-7.992
1489	F2636-0197	-8.557	-0.259	-3.656	-0.599	-45.557	-7.849
1490	F2636-0366	-8.557	-0.285	-3.214	-0.784	-39.823	-10.621
1491	F2014-0793	-8.556	-0.259	-3.989	-0.682	-50.141	-9.997
1492	F2692-0665	-8.556	-0.306	-3.788	-0.667	-47.718	-6.696
1493	F0660-1485	-8.556	-0.285	-3.598	-0.657	-44.487	-8.101
1494	asinex6481	-8.555	-0.295	-2.712	-0.747	-50.217	-8.342
1495	F3235-0270	-8.555	-0.267	-2.904	-0.623	-43.884	-9.344
1496	815853-R-247	-8.554	-0.356	-2.344	-0.961	-39.918	-53.865
1497	F3168-1737	-8.554	-0.244	-4.388	-0.367	-52.922	-3.978
1498	F0372-0492	-8.554	-0.317	-3.494	-0.351	-49.193	-6.249
1499	F2692-0140	-8.554	-0.238	-3.939	-0.642	-58.976	-7.306
1500	asinex729	-8.553	-0.342	-3.338	-0.796	-43.619	-11.574
1501	F1607-1058	-8.553	-0.252	-3.884	-0.61	-57.37	-6.907
1502	F2014-0823	-8.553	-0.267	-3.778	-0.655	-50.634	-9.639
1503	F0648-0251	-8.552	-0.252	-3.247	-0.868	-56.025	-6.622
1504	asinex6750	-8.551	-0.317	-3.522	-0.45	-43.032	-9.967
1505	F3234-1583	-8.55	-0.295	-3.152	-0.414	-45.534	-6.808
1506	F1873-0627	-8.55	-0.295	-3.272	-0.467	-43.553	-7.213
1507	F3235-1033	-8.55	-0.285	-2.496	-0.73	-41.278	-8.665
1508	vitegravir (GS-913	-8.55	-0.276	-3.51	-0.836	-40.853	-11.383
1509	F0654-1523	-8.547	-0.276	-3.3	-0.731	-45.753	-7.573
1510	F2636-0414	-8.547	-0.285	-3.15	-0.839	-43.725	-10.202
1511	F3164-0105	-8.547	-0.342	-2.691	-0.656	-35.574	-8.778
1512	F3234-0851	-8.547	-0.285	-2.528	-0.785	-43.567	-8.363
1513	F0666-0225	-8.545	-0.231	-4.633	-0.458	-59.208	-6.865
1514	F2437-0409	-8.545	-0.276	-3.296	-0.912	-47.327	-10.195
1515	F2233-0061	-8.545	-0.295	-2.799	-0.966	-43.227	-10.725
1516	F2475-0262	-8.545	-0.276	-2.638	-0.929	-42.704	-10.22
1517	F3259-0447	-8.544	-0.356	-2.885	-0.833	-37.183	-9.596
1518	F3234-0927	-8.544	-0.276	-2.876	-0.617	-42.734	-8.714
1519	F0580-0763	-8.543	-0.251	-3.926	-0.613	-56.761	-4.637
1520	F0886-0068	-8.543	-0.295	-3.16	-0.864	-41.352	-10.788
1521	F2013-0059	-8.543	-0.276	-2.922	-0.685	-46.439	-8.847
1522	F0648-0530	-8.542	-0.267	-3.222	-0.608	-57.341	-8.667
1523	asinex6751	-8.54	-0.316	-3.489	-0.773	-42.323	-9.218
1524	F2542-1699	-8.54	-0.316	-2.202	-0.811	-43.606	-9.352
1525	F2636-0326	-8.539	-0.251	-3.571	-0.613	-45.092	-8.906
1526	F3165-0399	-8.538	-0.259	-3.691	-0.648	-55.863	-7.517
1527	F2014-0817	-8.538	-0.294	-3.53	-0.662	-50.627	-9.225
1528	F2014-0667	-8.538	-0.285	-3.605	-0.609	-52.559	-9.174
1529	F3124-1029	-8.537	-0.341	-2.145	-0.822	-36.369	-10.603
1530	F2015-0058	-8.536	-0.275	-3.596	-0.617	-52.891	-7.267
1531	F2233-0671	-8.535	-0.285	-2.842	-0.955	-43.217	-10.728
1532	815853-R-175	-8.534	-0.341	-2.98	-0.868	-40.806	-50.373
1533	F2013-0515	-8.534	-0.267	-2.516	-0.924	-39.554	-11.643
1534	F3259-0181	-8.534	-0.316	-2.262	-0.901	-37.201	-10.559
1535	F2636-0244	-8.533	-0.294	-3.432	-0.652	-41.965	-7.629
1536	F3234-0425	-8.533	-0.305	-2.683	-0.747	-38.264	-10.019
1537	F3382-5085	-8.533	-0.275	-3.88	-0.579	-50.37	-7.757
1538	F3235-1151	-8.533	-0.267	-2.852	-0.742	-46.805	-8.909
1539	F3259-0169	-8.533	-0.267	-2.587	-0.759	-43.981	-11.273
1540	F1687-0135	-8.533	-0.284	-3.368	-0.781	-42.165	-10.828
1541	F0634-0694	-8.533	-0.244	-3.881	-0.863	-47.581	-10.299
1542	F3235-0269	-8.532	-0.275	-2.605	-0.55	-45.672	-8.825
1543	F2013-0661	-8.532	-0.244	-2.95	-0.572	-49.949	-7.456
1544	F3406-4580	-8.531	-0.284	-2.554	-0.866	-49.212	-12.866
1545	F3164-0111	-8.531	-0.294	-2.586	-0.874	-42.965	-7.811
1546	asinex7062	-8.53	-0.284	-3.12	-0.933	-42.2	-14.588
1547	F0887-0098	-8.53	-0.305	-2.506	-0.928	-34.745	-10.844
1548	F3406-2616	-8.53	-0.316	-3.516	-0.794	-44.088	-7.391
1549	F2636-0497	-8.53	-0.284	-2.525	-0.97	-42.998	-11.469
1550	F3406-2639	-8.53	-0.305	-3.544	-0.795	-44.445	-7.034
1551	F2636-0084	-8.53	-0.275	-3.416	-0.669	-43.848	-7.901
1552	F0922-0908	-8.529	-0.267	-2.828	-1.178	-42.505	-12.021
1553	F0654-1416	-8.528	-0.294	-2.507	-0.925	-45.526	-9.292
1554	F3235-0433	-8.528	-0.267	-2.701	-0.596	-38.685	-10.265
1555	F5313-0819	-8.528	-0.316	-2.666	-0.65	-45.306	-6.403
1556	F0654-0789	-8.528	-0.284	-2.806	-0.78	-43.213	-8.641
1557	F2636-0195	-8.528	-0.258	-3.665	-0.612	-45.387	-7.841
1558	F1891-0614	-8.527	-0.284	-2.857	-0.636	-46.018	-6.551
1559	F1891-0114	-8.527	-0.275	-2.51	-0.87	-38.725	-10.683
1560	opinavir (ABT-378	-8.527	-0.185	-4.896	-0.16	-57.669	-5.386
1561	F2542-1131	-8.526	-0.266	-2.737	-0.883	-40.25	-11.163
1562	F3289-1087	-8.525	-0.284	-2.654	-0.545	-42.147	-10.246
1563	F2437-0028	-8.525	-0.275	-2.882	-1.242	-44.342	-9.735
1564	F1609-0177	-8.524	-0.258	-2.778	-0.945	-47.639	-11.462
1565	F3124-1166	-8.524	-0.266	-2.861	-0.767	-49.9	-7.597
1566	asinex4987	-8.523	-0.341	-2.164	-0.698	-39.045	-8.183
1567	F1873-0630	-8.523	-0.284	-3.284	-0.474	-44.199	-7.083
1568	asinex6054	-8.522	-0.341	-2.165	-0.766	-43.095	-11.06
1569	F2013-0546	-8.522	-0.275	-2.951	-0.669	-46.922	-6.781
1570	F2636-0582	-8.522	-0.23	-3.591	-0.613	-45.676	-8.961
1571	F3235-1334	-8.522	-0.387	-2.595	-0.509	-37.886	-7.692
1572	F3235-0392	-8.521	-0.266	-3.308	-0.317	-45.271	-6.253
1573	F1614-0102	-8.521	-0.275	-3.285	-0.661	-41.048	-8.467
1574	F0648-0125	-8.52	-0.275	-2.713	-0.689	-50.315	-9.244
1575	F3382-0896	-8.52	-0.237	-3.042	-1.126	-47.668	-11.869
1576	F0648-0726	-8.52	-0.243	-3.237	-0.708	-53.438	-9.144
1577	F3234-1338	-8.52	-0.275	-3.008	-0.929	-39.848	-11.978
1578	F2013-0086	-8.52	-0.258	-2.771	-0.914	-38.767	-12.114
1579	F5032-0017	-8.52	-0.316	-2.562	-0.92	-37.621	-11.329
1580	F2636-0258	-8.52	-0.243	-3.528	-0.613	-46.933	-8.581
1581	asinex7196	-8.519	-0.266	-3.656	-0.698	-44.46	-11.422
1582	F3289-0885	-8.519	-0.316	-2.584	-0.798	-42.207	-8.536
1583	F2013-0621	-8.519	-0.355	-2.848	-0.663	-35.803	-7.33
1584	815853-R-152	-8.518	-0.37	-3.251	-0.789	-40.169	-51.535
1585	F2636-0267	-8.518	-0.275	-3.463	-0.61	-44.515	-8.054
1586	F0654-1385	-8.518	-0.304	-2.973	-0.922	-40.094	-9.378
1587	F0648-0361	-8.518	-0.258	-2.704	-0.823	-58.248	-10.191
1588	F2636-0328	-8.518	-0.251	-3.536	-0.613	-44.623	-8.49
1589	F3144-0103	-8.516	-0.387	-2.665	-0.937	-36.524	-8.283
1590	F3259-0170	-8.516	-0.258	-2.644	-0.901	-46.687	-10.755
1591	F3165-0611	-8.515	-0.237	-2.769	-0.92	-49.298	-12.112
1592	F3289-0883	-8.515	-0.328	-2.481	-0.809	-41.467	-9.181
1593	F2013-0064	-8.514	-0.304	-2.498	-0.902	-37.355	-10.213
1594	F3382-0897	-8.514	-0.243	-2.871	-1.215	-38.982	-13.365
1595	F1167-0109	-8.514	-0.315	-2.557	-1.215	-37.851	-10.799
1596	815853-R-183	-8.513	-0.37	-2.658	-0.888	-37.546	-45.368
1597	F3124-0047	-8.513	-0.266	-3.033	-0.929	-41.239	-11.777
1598	F2692-0549	-8.511	-0.284	-3.946	-0.653	-51.419	-6.294
1599	F5257-0371	-8.51	-0.293	-2.812	-0.88	-38.624	-8.954
1600	815853-R-169	-8.509	-0.37	-2.798	-0.829	-36.875	-47.832
1601	asinex598	-8.508	-0.258	-3.267	-0.647	-50.618	-7.212
1602	asinex6120	-8.507	-0.315	-2.191	-1.358	-37.086	-14.892
1603	F2013-0461	-8.507	-0.315	-2.725	-0.882	-34.958	-9.685
1604	F2636-0322	-8.507	-0.25	-3.48	-0.613	-44.171	-8.506
1605	F3260-0937	-8.506	-0.37	-2.046	-0.668	-33.599	-9.231
1606	asinex6866	-8.505	-0.327	-2.566	-0.797	-33.403	-9.324
1607	F3235-0632	-8.505	-0.293	-3.106	-0.456	-47.56	-5.216
1608	F1614-0220	-8.505	-0.274	-3.742	-0.691	-40.027	-8.061
1609	F3234-0113	-8.503	-0.283	-2.523	-1.154	-41.935	-11.333
1610	F1608-0575	-8.502	-0.266	-2.922	-0.794	-48.087	-10.923
1611	F1608-0424	-8.502	-0.283	-3.797	-0.706	-53.825	-6.772
1612	F1882-1391	-8.502	-0.274	-3.716	-0.706	-50.527	-6.64
1613	F3001-0039	-8.502	-0.327	-2.716	-0.533	-45.428	-5.427
1614	F5257-0366	-8.502	-0.283	-3.565	-0.613	-47.502	-6.122
1615	asinex7277	-8.501	-0.274	-4.277	-0.31	-48.226	-7.031
1616	F6559-0746	-8.501	-0.293	-2.622	-0.608	-43.358	-8.974
1617	F3260-0155	-8.501	-0.304	-2.227	-0.793	-41.209	-11.521
1618	F2437-0415	-8.5	-0.283	-2.908	-1.166	-45.636	-9.611
1619	F0648-0538	-8.5	-0.274	-3.784	-0.613	-49.431	-7.129
1620	F2636-0260	-8.5	-0.274	-3.198	-0.752	-47.767	-7.942
1621	F0612-0182	-8.5	-0.283	-3.133	-0.83	-51.305	-12.748
1622	asinex412	-8.499	-0.258	-4.048	-0.526	-50.628	-6.97
1623	F2636-0021	-8.499	-0.354	-1.557	-1.262	-36.576	-12.167
1624	F2636-0530	-8.499	-0.243	-3.851	-0.615	-47.66	-7.757
1625	asinex520	-8.498	-0.274	-2.901	-0.743	-53.155	-12.712
1626	F2013-0263	-8.498	-0.266	-2.76	-0.733	-48.652	-8.766
1627	F5257-0384	-8.498	-0.258	-3.383	-0.61	-49.062	-8.692
1628	F3382-0136	-8.497	-0.243	-4.241	-0.233	-51.751	-5.432
1629	F2636-0351	-8.497	-0.25	-3.617	-0.588	-46.444	-6.269
1630	asinex6067	-8.496	-0.283	-2.45	-0.808	-38.931	-13.936
1631	asinex317	-8.496	-0.257	-2.48	-0.604	-46.669	-13.726
1632	F2542-0383	-8.495	-0.303	-2.987	-0.52	-47.253	-4.678
1633	F1144-0049	-8.495	-0.257	-3.477	-0.578	-42.564	-13.057
1634	F6524-5827	-8.494	-0.354	-1.758	-0.616	-41.435	-10.686
1635	F0886-0038	-8.494	-0.257	-3.832	-0.472	-45.767	-7.315
1636	F2692-0792	-8.494	-0.274	-3.988	-0.614	-51.253	-6.401
1637	F3234-1275	-8.494	-0.274	-2.707	-0.757	-37.64	-11.049
1638	F2437-0230	-8.493	-0.293	-2.844	-0.899	-47.387	-9.257
1639	F0659-0446	-8.492	-0.293	-3.547	-0.463	-47.352	-5.845
1640	F2692-0343	-8.492	-0.257	-3.642	-0.647	-58.899	-7.472
1641	Sennoside A	-8.492	-0.137	-2.128	-0.144	-49.899	-22.811
1642	F2636-0237	-8.491	-0.265	-3.271	-0.82	-44.683	-9.701
1643	F2013-0673	-8.491	-0.243	-2.976	-0.623	-45.923	-9.576
1644	F3260-0883	-8.491	-0.425	-2.045	-0.796	-33.037	-8.132
1645	F3235-0207	-8.49	-0.283	-3.114	-0.5	-40.615	-7.776
1646	F1891-0592	-8.49	-0.283	-2.552	-0.692	-38.372	-10.814
1647	F1601-0571	-8.489	-0.265	-3.944	-0.681	-46.336	-7.993
1648	F1607-0958	-8.488	-0.25	-3.974	-0.649	-54.105	-7.329
1649	F0579-0372	-8.488	-0.314	-3.607	-0.473	-49.622	-8.75
1650	F0612-0176	-8.488	-0.314	-3.498	-0.622	-47.018	-11.667
1651	F2636-0318	-8.487	-0.293	-3.238	-0.617	-42.027	-7.572
1652	F3243-0642	-8.486	-0.257	-4.743	-0.318	-48.549	-3.474
1653	F3165-0404	-8.486	-0.257	-3.929	-0.643	-56.993	-6.381
1654	F3382-5065	-8.486	-0.265	-3.953	-0.735	-49.693	-9.429
1655	815853-R-189	-8.485	-0.386	-2.467	-0.829	-35.82	-43.956
1656	F2013-0442	-8.485	-0.257	-2.644	-0.79	-48.839	-8.564
1657	F2013-0201	-8.485	-0.326	-3.126	-0.444	-45.181	-4.515
1658	F3259-0144	-8.485	-0.274	-2.921	-0.6	-43.547	-8.91
1659	F2636-0206	-8.485	-0.25	-3.669	-0.599	-47.071	-8.567
1660	F0653-0543	-8.484	-0.242	-3.915	-0.489	-55.758	-8.255
1661	F0827-0297	-8.484	-0.404	-2.108	-1.127	-36.072	-9.753
1662	asinex8353	-8.483	-0.265	-2.875	-0.504	-44.888	-9.648
1663	1126164-R-02	-8.482	-0.265	-3.361	-0.872	-49.878	-60.594
1664	F1699-0027	-8.482	-0.274	-3.009	-0.592	-44.631	-8.213
1665	F0648-0536	-8.482	-0.283	-3.528	-0.871	-50.454	-6.833
1666	F2692-0514	-8.481	-0.292	-3.878	-0.643	-51.922	-6.157
1667	F3235-0261	-8.48	-0.303	-3.212	-0.349	-46.857	-4.313
1668	F3164-0237	-8.48	-0.274	-2.859	-0.84	-45.595	-7.612
1669	F3062-0345	-8.48	-0.257	-3.715	-0.615	-56.805	-7.686
1670	F0648-0492	-8.48	-0.242	-3.368	-0.314	-57.05	-7.87
1671	F3259-0150	-8.48	-0.314	-3.279	-0.32	-43.684	-6.262
1672	asinex6811	-8.479	-0.339	-2.171	-0.741	-38.719	-17.213
1673	F0528-0354	-8.479	-0.236	-4.004	-0.32	-57.629	-6.455
1674	F3259-0217	-8.479	-0.274	-2.966	-0.549	-43.826	-7.933
1675	F3259-0459	-8.479	-0.385	-2.605	-0.827	-35.307	-8.606
1676	F1614-0292	-8.479	-0.249	-3.303	-0.639	-48.082	-7.771
1677	F2013-0655	-8.479	-0.274	-2.6	-0.633	-44.962	-8.677
1678	F2013-0669	-8.478	-0.249	-2.826	-0.582	-45.619	-9.39
1679	F2692-0434	-8.478	-0.249	-3.68	-0.677	-51.89	-9.143
1680	F0648-0464	-8.478	-0.265	-2.837	-0.868	-52.783	-6.42
1681	F2542-1106	-8.478	-0.283	-3.036	-0.505	-45.613	-5.739
1682	F1468-0026	-8.477	-0.303	-3.199	-0.668	-39.608	-8.339
1683	asinex282	-8.476	-0.273	-3.741	-0.76	-46.35	-8.633
1684	F0648-0649	-8.476	-0.273	-3.573	-0.869	-51.496	-6.906
1685	F2636-0348	-8.476	-0.249	-3.359	-0.613	-44.216	-6.597
1686	F3176-0004	-8.476	-0.446	-2.091	-0.794	-30.631	-8.071
1687	F3376-1586	-8.476	-0.353	-1.898	-0.826	-37.44	-8.731
1688	F0665-0445	-8.475	-0.265	-4.529	0	-52.906	-4.706
1689	F2636-0200	-8.475	-0.257	-3.62	-0.601	-44.958	-8.146
1690	F1687-0034	-8.474	-0.265	-3.237	-0.852	-47.195	-10.4
1691	F3234-0926	-8.474	-0.273	-3.037	-0.921	-41.308	-11.833
1692	F3411-7531	-8.473	-0.257	-2.964	-0.554	-43.837	-8.686
1693	F0634-0486	-8.473	-0.292	-2.814	-0.659	-44.814	-7.274
1694	F2692-0359	-8.472	-0.257	-3.896	-0.642	-57.753	-6.703
1695	F3259-0219	-8.472	-0.265	-2.975	-0.549	-44.381	-8.4
1696	F2013-0092	-8.472	-0.292	-2.912	-0.582	-46.543	-5.898
1697	F3235-0906	-8.472	-0.292	-2.842	-0.649	-41.707	-6.709
1698	F3260-0045	-8.472	-0.353	-2.473	-0.929	-34.62	-9.43
1699	F1289-0161	-8.471	-0.314	-2.5	-0.835	-40.376	-9.435
1700	F0648-0423	-8.47	-0.282	-3.478	-0.869	-50.509	-6.585
1701	asinex8436	-8.469	-0.273	-3.389	-0.903	-42.165	-10.513
1702	asinex2602	-8.469	-0.273	-3.115	-0.614	-52.202	-7.565
1703	F1798-0603	-8.469	-0.257	-4.118	-0.53	-46.458	-6.143
1704	asinex561	-8.468	-0.292	-3.26	-0.853	-42.683	-11.194
1705	F2692-0691	-8.468	-0.292	-3.665	-0.644	-49.207	-7.228
1706	F3259-0180	-8.468	-0.314	-2.277	-0.804	-37.725	-9.776
1707	F3164-0040	-8.467	-0.314	-2.699	-0.558	-41.394	-6.659
1708	F2636-0423	-8.467	-0.249	-3.828	-0.612	-48.422	-6.572
1709	F0612-0168	-8.466	-0.282	-3.191	-0.877	-41.945	-11.84
1710	F1827-0081	-8.466	-0.257	-3.246	-0.613	-49.621	-8.833
1711	F2013-0514	-8.465	-0.257	-2.451	-0.873	-43.192	-10.805
1712	asinex502	-8.464	-0.313	-3.135	-0.887	-43.03	-11.53
1713	F1765-0380	-8.464	-0.256	-3.604	-0.611	-44.454	-7.5
1714	F3382-5067	-8.464	-0.264	-3.882	-0.592	-52.083	-7.068
1715	F3235-1438	-8.463	-0.256	-3.215	-0.919	-44.088	-12.216
1716	F0886-0029	-8.463	-0.325	-2.602	-0.784	-38.276	-10.444
1717	asinex4865	-8.462	-0.313	-1.685	-0.962	-40.394	-10.256
1718	F2013-0464	-8.461	-0.313	-2.94	-0.711	-36.148	-7.966
1719	F0648-0518	-8.461	-0.256	-3.051	-0.868	-51.266	-9.294
1720	F0648-0137	-8.461	-0.256	-3.252	-0.87	-55.651	-5.958
1721	F2014-0263	-8.46	-0.282	-3.561	-0.511	-45.198	-11.631
1722	F0648-0660	-8.459	-0.256	-3.749	-0.871	-50.321	-7.111
1723	F3382-0751	-8.458	-0.242	-3.58	-0.758	-54.442	-10.564
1724	F2636-0304	-8.458	-0.242	-3.816	-0.652	-44.572	-9.07
1725	F3407-1884	-8.457	-0.206	-2.772	-0.566	-59.367	-9.47
1726	F2692-0067	-8.457	-0.273	-4.043	-0.598	-52.312	-7.982
1727	asinex7037	-8.456	-0.292	-2.085	-0.523	-47.768	-11.392
1728	F0381-3333	-8.456	-0.325	-3.155	-0.789	-40.873	-10.04
1729	F3001-0017	-8.456	-0.229	-2.023	-1.158	-45.578	-11.994
1730	F0570-0384	-8.456	-0.273	-2.593	-0.781	-40.858	-11.37
1731	F2692-0728	-8.455	-0.282	-3.653	-0.75	-47.203	-9.382
1732	F0507-4724	-8.454	-0.242	-4.031	-0.32	-57.107	-6.427
1733	F0654-1125	-8.454	-0.273	-3.377	-0.613	-45.128	-5.857
1734	F2636-0645	-8.454	-0.325	-2.767	-0.797	-37.656	-9.507
1735	F0653-0805	-8.454	-0.249	-3.673	-0.86	-49.95	-5.096
1736	1126164-R-03	-8.453	-0.302	-2.686	-0.32	-44.269	-51.416
1737	F2692-0545	-8.453	-0.282	-3.714	-0.689	-46.79	-9.046
1738	F3234-0092	-8.453	-0.264	-2.082	-0.612	-45.447	-14.029
1739	F2636-0311	-8.453	-0.256	-2.974	-0.906	-45.566	-9.657
1740	F0570-0377	-8.453	-0.282	-2.66	-0.744	-43.632	-8.95
1741	F0570-0412	-8.452	-0.235	-2.949	-0.641	-52.139	-6.482
1742	F1167-0073	-8.452	-0.367	-1.561	-1.216	-34.889	-12.584
1743	F1191-0007	-8.452	-0.302	-3.325	-0.601	-42.987	-7.193
1744	F2636-0516	-8.452	-0.249	-3.802	-0.658	-44.699	-7.583
1745	F0648-0535	-8.451	-0.256	-2.949	-0.868	-52.412	-10.164
1746	F3235-0273	-8.45	-0.264	-2.855	-0.601	-43.758	-9.267
1747	F2015-0019	-8.45	-0.256	-3.904	-0.613	-52.955	-6.947
1748	F0648-0368	-8.45	-0.241	-3.162	-0.868	-57.309	-6.527
1749	F0648-0322	-8.449	-0.273	-3.717	-0.871	-48.321	-6.323
1750	asinex6065	-8.448	-0.302	-1.915	-1.19	-34.456	-14.573
1751	F0648-0666	-8.448	-0.264	-3.303	-0.868	-52.067	-6.469
1752	F3235-1274	-8.447	-0.302	-2.664	-0.633	-45.248	-6.916
1753	F0648-0497	-8.447	-0.241	-3.07	-0.899	-57.261	-7.507
1754	F2013-0012	-8.447	-0.264	-2.874	-0.474	-45.83	-7.287
1755	F2013-0685	-8.446	-0.302	-3.176	-0.423	-45.614	-5.148
1756	F3235-1420	-8.446	-0.264	-2.628	-0.91	-42.453	-9.2
1757	F0612-0091	-8.446	-0.291	-3.24	-0.664	-43.499	-10.308
1758	F3260-0138	-8.446	-0.302	-2.283	-0.924	-38.661	-11.111
1759	F1608-0145	-8.444	-0.241	-3.629	-0.637	-55.592	-4.818
1760	F6456-1266	-8.443	-0.291	-3.457	-0.659	-47.789	-7.435
1761	F1873-1175	-8.443	-0.291	-3.363	-0.454	-46.053	-7.554
1762	F0612-0092	-8.443	-0.302	-2.594	-0.658	-38.929	-10.028
1763	F0823-0019	-8.443	-0.291	-3.077	-0.873	-41.756	-10.057
1764	asinex433	-8.442	-0.264	-3.216	-0.893	-46.213	-8.906
1765	F0665-0370	-8.442	-0.248	-4.126	-0.017	-54.579	-3.781
1766	F3235-0553	-8.442	-0.272	-2.661	-0.872	-37.421	-10.734
1767	F2583-0372	-8.442	-0.264	-2.586	-0.919	-40.073	-10.761
1768	F1892-0189	-8.44	-0.272	-2.771	-0.472	-44.886	-6.421
1769	F0648-0363	-8.44	-0.248	-3.174	-0.869	-56.09	-6.3
1770	F2085-0019	-8.44	-0.272	-3.712	-0.644	-47.873	-6.099
1771	F1873-0698	-8.439	-0.291	-3.211	-0.702	-41.29	-8.246
1772	F2542-0965	-8.439	-0.313	-2.87	-0.659	-38.079	-7.263
1773	F3260-0135	-8.439	-0.313	-2.196	-0.796	-39.615	-10.13
1774	F0381-4714	-8.439	-0.264	-2.294	-1.238	-41.566	-14.287
1775	F2437-0094	-8.438	-0.291	-2.654	-1.141	-40.035	-10.521
1776	F2013-0693	-8.438	-0.264	-2.576	-0.872	-41.557	-10.606
1777	F3234-0550	-8.438	-0.272	-2.868	-0.725	-48.799	-10.718
1778	F0648-0537	-8.437	-0.272	-3.46	-0.815	-50.182	-6.256
1779	F3164-0419	-8.437	-0.264	-2.878	-0.931	-41.532	-11.491
1780	F3234-1551	-8.436	-0.291	-3.24	-0.257	-47.032	-5.311
1781	F0922-0876	-8.436	-0.272	-2.195	-1.175	-42.335	-13.33
1782	F3289-1090	-8.436	-0.291	-2.8	-0.584	-41.551	-9.558
1783	F2964-2583	-8.435	-0.312	-3.936	-0.174	-47.243	-5.864
1784	F1889-0081	-8.435	-0.301	-2.745	-0.658	-46.064	-7.948
1785	F6526-0159	-8.434	-0.383	-2.852	-0.59	-38.103	-8.583
1786	F2506-1329	-8.434	-0.272	-3.552	-0.32	-46.619	-10.403
1787	F2233-0305	-8.434	-0.264	-2.744	-0.929	-47.54	-10.494
1788	F2233-0060	-8.434	-0.291	-2.839	-0.902	-48.605	-8.561
1789	F1892-0179	-8.434	-0.281	-2.444	-0.605	-44.13	-7.284
1790	F0612-0207	-8.434	-0.281	-2.845	-0.79	-43.233	-10.467
1791	F1884-0450	-8.432	-0.241	-3.641	-0.353	-59.767	-7.742
1792	F0648-0121	-8.43	-0.272	-3.471	-0.896	-46.189	-7.954
1793	F2013-0876	-8.43	-0.241	-2.867	-0.529	-48.738	-9.085
1794	F0373-0753	-8.43	-0.241	-4.033	-0.394	-56.423	-8.759
1795	F3376-2634	-8.429	-0.291	-2.418	-0.761	-38.23	-8.787
1796	F1882-1384	-8.429	-0.291	-3.664	-0.765	-47.055	-6.451
1797	F2477-0122	-8.428	-0.351	-2.314	-0.921	-31.423	-10.543
1798	F3260-0689	-8.428	-0.366	-2.82	-0.708	-35.482	-8.702
1799	asinex5820	-8.427	-0.272	-2.277	-0.829	-40.631	-13.387
1800	F2636-0512	-8.427	-0.248	-3.583	-0.659	-43.038	-9.528
1801	F2636-0420	-8.427	-0.248	-3.693	-0.612	-47.131	-6.81
1802	F2636-0451	-8.426	-0.272	-3.381	-0.852	-43.691	-8.227
1803	F3168-2191	-8.426	-0.241	-3.315	-0.493	-56.829	-5.475
1804	F1191-0119	-8.425	-0.312	-2.837	-0.819	-40.875	-7.929
1805	asinex337	-8.424	-0.281	-3.664	-0.79	-47.751	-8.28
1806	F2582-0015	-8.424	-0.29	-3.393	-0.439	-42.505	-4.835
1807	F3235-1341	-8.424	-0.301	-2.366	-0.64	-41.496	-8.354
1808	F2692-0729	-8.424	-0.281	-3.981	-0.629	-51.892	-6.882
1809	F0018-0474	-8.424	-0.222	-3.333	-0.794	-47.393	-9.982
1810	F0648-0658	-8.423	-0.263	-4	-0.566	-52.668	-6.664
1811	asinex4988	-8.422	-0.337	-1.32	-1.394	-30.655	-14.283
1812	F3235-0998	-8.422	-0.301	-2.828	-0.551	-41.087	-6.66
1813	F2013-0087	-8.422	-0.301	-3.046	-0.455	-46.615	-4.722
1814	F3234-0076	-8.422	-0.351	-1.772	-0.901	-35.13	-13.587
1815	F1882-1390	-8.421	-0.263	-3.782	-0.841	-50.509	-7.583
1816	F2013-0864	-8.421	-0.272	-3.032	-0.48	-44.99	-6.544
1817	F2636-0285	-8.421	-0.272	-3.009	-0.773	-45.843	-8.503
1818	F3124-1146	-8.42	-0.281	-2.343	-0.885	-45.972	-9.764
1819	F3235-0275	-8.42	-0.263	-2.892	-0.501	-47.25	-6.391
1820	F2542-1688	-8.419	-0.351	-2.258	-0.831	-40.119	-8.935
1821	F0648-0439	-8.419	-0.263	-3.79	-0.871	-50.83	-6.566
1822	F5047-0348	-8.418	-0.272	-2.715	-0.902	-43.385	-9.033
1823	F2636-0204	-8.418	-0.248	-3.785	-0.605	-45.875	-7.84
1824	F2692-0365	-8.418	-0.248	-3.841	-0.658	-54.335	-8.015
1825	F2636-0356	-8.418	-0.228	-3.683	-0.601	-47.521	-6.459
1826	F0665-0485	-8.417	-0.248	-3.188	-0.608	-51.758	-7.959
1827	F2013-0705	-8.417	-0.301	-2.827	-0.677	-41.337	-7.529
1828	F6556-7478	-8.416	-0.366	-3.09	-0.738	-38.313	-10.98
1829	F2636-0099	-8.416	-0.24	-3.563	-0.667	-44.98	-8.4
1830	F2013-0681	-8.416	-0.366	-2.813	-0.454	-39.041	-6.012
1831	F0570-0083	-8.415	-0.29	-2.647	-0.912	-42.627	-9.088
1832	F3235-0206	-8.415	-0.312	-2.877	-0.604	-40.703	-6.869
1833	F0887-0097	-8.414	-0.312	-2.241	-0.918	-34.708	-10.256
1834	F0017-1836	-8.414	-0.351	-2.324	-0.613	-39.081	-8.78
1835	F1174-3005	-8.414	-0.271	-4.017	-0.113	-52.393	-5.426
1836	F2964-3240	-8.414	-0.351	-3.675	-0.493	-44.383	-5.646
1837	F0648-0124	-8.413	-0.28	-3.076	-0.606	-51.43	-7.291
1838	asinex4165	-8.412	-0.255	-3.078	-0.916	-41.477	-11.602
1839	F5257-0367	-8.412	-0.263	-2.966	-0.625	-51.338	-6.567
1840	F0648-0561	-8.412	-0.28	-3.031	-0.871	-51.646	-7.27
1841	F3235-0287	-8.411	-0.29	-2.737	-0.522	-44.146	-8.082
1842	F1765-0054	-8.411	-0.263	-3.792	-0.53	-48.782	-5.86
1843	F2013-0691	-8.411	-0.263	-2.477	-0.924	-41.717	-10.462
1844	F0648-0659	-8.41	-0.263	-3.92	-0.796	-53.708	-5.57
1845	F2455-0128	-8.408	-0.35	-2.776	-0.856	-37.168	-7.994
1846	F3259-0219	-8.408	-0.263	-3.18	-0.628	-45.042	-7.549
1847	815853-R-150	-8.407	-0.35	-2.818	-0.799	-38.39	-45.154
1848	F3124-0631	-8.407	-0.263	-3.014	-0.795	-42.455	-11.021
1849	F3259-0143	-8.407	-0.271	-3.091	-0.736	-43.778	-7.368
1850	F0648-0224	-8.406	-0.271	-3.004	-0.869	-53.093	-5.615
1851	F3235-1413	-8.406	-0.271	-2.552	-0.906	-42.166	-9.25
1852	F1889-0609	-8.405	-0.263	-2.99	-0.822	-47.797	-7.503
1853	F5047-0323	-8.405	-0.28	-2.543	-1.191	-43.271	-10.385
1854	asinex8424	-8.404	-0.28	-2.329	-1.124	-43.128	-11.853
1855	F6524-1497	-8.404	-0.3	-2.563	-0.662	-45.684	-11.242
1856	F6439-0450	-8.404	-0.3	-2.605	-0.871	-45.152	-10.056
1857	F2636-0516	-8.404	-0.247	-4.106	-0.67	-44.009	-9.231
1858	F2636-0203	-8.404	-0.247	-3.49	-0.611	-44.746	-7.939
1859	F0648-0546	-8.404	-0.271	-3.767	-0.826	-52.017	-5.851
1860	F2013-0664	-8.403	-0.255	-2.877	-0.608	-44.29	-8.72
1861	F2636-0344	-8.403	-0.247	-3.56	-0.6	-45.459	-6.278
1862	F6469-1740	-8.402	-0.323	-2.457	-0.73	-46.706	-8.54
1863	F0660-1910	-8.402	-0.255	-4.537	-0.32	-52.864	-3.618
1864	F0570-0315	-8.401	-0.311	-2.397	-0.795	-42.274	-8.203
1865	F0580-0755	-8.401	-0.263	-3.787	-0.506	-51.853	-6.1
1866	815853-R-150	-8.4	-0.365	-2.646	-0.801	-36.691	-43.628
1867	F1289-0160	-8.399	-0.323	-2.395	-0.8	-39.187	-9.004
1868	F3124-0542	-8.399	-0.247	-2.909	-0.908	-40.479	-11.022
1869	F1892-0182	-8.399	-0.271	-2.308	-0.843	-39.916	-8.263
1870	F2013-0449	-8.398	-0.254	-2.553	-0.797	-48.23	-8.757
1871	F0648-0347	-8.398	-0.262	-3.42	-0.869	-51.963	-6.608
1872	F1191-0040	-8.397	-0.3	-3.043	-0.806	-40.446	-8.078
1873	F1607-0438	-8.397	-0.254	-3.736	-0.643	-55.548	-7.053
1874	F3406-2629	-8.397	-0.311	-3.394	-0.794	-43.234	-7.172
1875	F1191-0001	-8.397	-0.271	-3.298	-0.579	-49.935	-6.204
1876	F3289-0014	-8.397	-0.254	-2.594	-0.76	-44.773	-10.299
1877	F2013-0009	-8.396	-0.28	-2.816	-0.675	-45.335	-7.661
1878	F3124-1147	-8.396	-0.28	-2.27	-0.815	-47.062	-9.416
1879	F2636-0466	-8.396	-0.271	-3.622	-0.654	-44.449	-7.106
1880	F3235-0619	-8.396	-0.254	-3.025	-0.438	-47.241	-6.596
1881	F3411-2664	-8.395	-0.3	-2.785	-0.824	-43.296	-10.886
1882	F0373-0336	-8.395	-0.382	-2.373	-0.834	-33.661	-8.353
1883	F1051-0001	-8.394	-0.3	-2.535	-0.7	-38.954	-8.542
1884	asinex5246	-8.393	-0.323	-3.041	-0.864	-41.211	-10.509
1885	F2692-0031	-8.393	-0.271	-3.533	-0.603	-50.452	-5.192
1886	F3407-0801	-8.393	-0.227	-2.574	-1.197	-42.249	-14.283
1887	F3235-1432	-8.393	-0.262	-3.09	-0.354	-47.617	-6.657
1888	F0648-0141	-8.392	-0.247	-2.709	-1.237	-50.858	-9.207
1889	F1342-0008	-8.392	-0.311	-3.349	-0.781	-41.11	-9.44
1890	asinex7545	-8.391	-0.271	-4.285	-0.955	-44.512	-7.736
1891	F1765-0375	-8.391	-0.271	-3.472	-0.615	-42.57	-7.401
1892	F2636-0089	-8.391	-0.262	-3.353	-0.647	-43.656	-7.592
1893	F2923-0414	-8.391	-0.247	-2.071	-0.672	-49.719	-9.94
1894	asinex7191	-8.39	-0.3	-3.495	-0.669	-41.9	-9.779
1895	asinex8605	-8.39	-0.311	-2.728	-0.77	-42.43	-6.475
1896	F0669-0554	-8.388	-0.233	-4.102	-0.858	-49.844	-8.169
1897	F2636-0220	-8.388	-0.28	-3.411	-0.612	-41.194	-7.884
1898	F0528-0105	-8.388	-0.24	-3.778	-0.388	-53.613	-7.501
1899	F2692-0063	-8.387	-0.28	-3.901	-0.613	-51.485	-7.171
1900	F1873-1157	-8.386	-0.262	-3.172	-0.658	-49.078	-8.187
1901	F1614-0235	-8.386	-0.227	-2.773	-0.64	-53.434	-7.279
1902	F2636-0563	-8.385	-0.24	-3.848	-0.478	-49.405	-8.445
1903	F3234-0549	-8.385	-0.27	-2.953	-0.62	-51.549	-9.656
1904	F3235-0084	-8.384	-0.289	-2.589	-0.618	-41.97	-8.125
1905	F0017-0735	-8.384	-0.335	-2.175	-0.916	-33.453	-10.981
1906	F2582-0289	-8.384	-0.247	-3.465	-0.205	-49.787	-5.61
1907	F3289-1035	-8.384	-0.262	-2.533	-0.73	-41.182	-9.977
1908	F2964-3072	-8.383	-0.349	-3.646	-0.592	-43.6	-5.357
1909	F3382-5072	-8.383	-0.254	-3.088	-0.878	-51.257	-9.453
1910	F3260-0024	-8.382	-0.364	-2.661	-0.833	-35.75	-8.885
1911	F2692-0660	-8.381	-0.299	-3.824	-0.639	-48.822	-6.086
1912	F0665-0333	-8.381	-0.246	-4.021	-0.422	-55.945	-8.524
1913	F3259-0213	-8.381	-0.289	-2.367	-0.718	-38.913	-10.457
1914	F3176-0003	-8.381	-0.466	-1.711	-0.925	-26.187	-10.592
1915	F2636-0202	-8.38	-0.254	-3.59	-0.613	-44.834	-8.206
1916	F2692-0707	-8.38	-0.289	-3.65	-0.654	-49.27	-7.201
1917	F2542-0783	-8.379	-0.233	-2.794	-0.614	-50.698	-7.363
1918	F0648-0724	-8.378	-0.246	-3.069	-0.703	-52.418	-8.441
1919	F3234-0563	-8.378	-0.27	-2.676	-0.769	-39.518	-14.265
1920	F0403-0028	-8.378	-0.299	-2.521	-0.787	-37.777	-11.481
1921	F0886-0104	-8.378	-0.27	-2.683	-0.901	-45.546	-8.139
1922	asinex514	-8.377	-0.27	-3.609	-0.582	-41.565	-10.531
1923	F3235-0702	-8.377	-0.254	-2.731	-0.872	-39.581	-10.057
1924	F3382-5039	-8.377	-0.27	-3.639	-0.61	-52.628	-8.276
1925	F3260-0281	-8.377	-0.289	-2.56	-0.925	-38.525	-11.584
1926	F0656-0957	-8.376	-0.381	-1.918	-0.875	-39.414	-9.263
1927	F0641-0077	-8.375	-0.246	-3.535	-0.42	-59.24	-6.252
1928	F2636-0504	-8.375	-0.279	-3.484	-0.669	-38.906	-8.773
1929	F2013-0436	-8.374	-0.322	-2.905	-0.698	-36.015	-9.875
1930	F0648-0553	-8.373	-0.27	-3.505	-0.59	-49.433	-6.356
1931	F2582-0007	-8.373	-0.31	-2.669	-0.683	-40.83	-7.716
1932	F0886-0045	-8.373	-0.279	-3.158	-0.897	-45.658	-8.695
1933	F2636-0533	-8.373	-0.233	-3.873	-0.585	-48.102	-7.458
1934	F6474-7232	-8.372	-0.364	-2.578	-1.275	-30.976	-10.898
1935	F6247-1978	-8.371	-0.289	-3.325	-0.617	-44.055	-8.716
1936	F3260-0042	-8.371	-0.31	-2.461	-0.83	-37.139	-10.807
1937	F3124-0714	-8.37	-0.299	-2.33	-0.715	-38.084	-10.795
1938	F3141-0111	-8.37	-0.262	-4.393	-0.185	-50.646	-4.069
1939	F0654-1389	-8.37	-0.27	-3.193	-0.738	-43.998	-6.738
1940	asinex6792	-8.369	-0.399	-2.144	-0.8	-32.596	-12.209
1941	asinex8401	-8.369	-0.27	-2.746	-0.668	-39.083	-11.378
1942	F3260-0746	-8.369	-0.299	-2.977	-0.803	-41.739	-9.996
1943	F3235-0274	-8.369	-0.262	-2.658	-0.573	-42.624	-9.26
1944	F0648-0384	-8.369	-0.239	-3.056	-0.869	-57.737	-6.654
1945	F0372-0291	-8.369	-0.299	-3.257	-0.688	-44.852	-6.91
1946	F3406-6650	-8.368	-0.289	-3.129	-0.492	-48.077	-8.669
1947	F2636-0394	-8.368	-0.246	-3.537	-0.613	-47.114	-8.32
1948	F3235-1290	-8.368	-0.246	-2.972	-0.468	-51.357	-6.752
1949	F0570-0020	-8.367	-0.299	-2.487	-0.828	-41.305	-9.839
1950	F2014-0683	-8.367	-0.27	-3.655	-0.528	-49.763	-10.165
1951	F1468-0101	-8.367	-0.322	-2.316	-0.915	-34.134	-10.92
1952	F3382-5035	-8.366	-0.261	-3.464	-0.678	-53.451	-8.735
1953	F2964-2163	-8.366	-0.31	-3.915	-0.159	-46.714	-5.889
1954	F0648-0472	-8.366	-0.239	-3.167	-0.608	-56.077	-7.089
1955	F0660-1906	-8.366	-0.254	-4.623	-0.296	-48.897	-3.41
1956	asinex3803	-8.365	-0.31	-2.862	-0.613	-38.974	-5.466
1957	F2599-0055	-8.365	-0.288	-1.967	-0.895	-45.699	-10.425
1958	F2013-0439	-8.365	-0.279	-2.646	-0.822	-42.974	-9.588
1959	F0570-0016	-8.364	-0.279	-2.573	-0.837	-44.706	-8.984
1960	F2692-0035	-8.363	-0.27	-3.65	-0.647	-52.299	-7.582
1961	F2013-0017	-8.363	-0.261	-2.806	-0.568	-41.616	-10.909
1962	F0887-0009	-8.363	-0.299	-2.394	-1.302	-37.948	-12.996
1963	F2013-0651	-8.362	-0.322	-2.438	-0.612	-42.055	-8.277
1964	F2013-0372	-8.362	-0.253	-3.386	-0.449	-47.069	-5.706
1965	F3260-0022	-8.362	-0.38	-2.413	-0.828	-33.446	-9.586
1966	F3235-0614	-8.362	-0.279	-2.855	-0.571	-41.041	-9.201
1967	F0660-1937	-8.361	-0.253	-4.968	-0.13	-47.565	-3.329
1968	F1051-0124	-8.361	-0.279	-2.729	-0.732	-40.486	-8.692
1969	asinex8422	-8.359	-0.253	-3.301	-0.369	-50.238	-8.179
1970	F3234-0543	-8.359	-0.246	-1.841	-0.922	-41.908	-16.765
1971	F0018-0456	-8.357	-0.253	-3.069	-0.914	-42.171	-10.51
1972	F0648-0576	-8.357	-0.261	-3.173	-0.608	-54.97	-8.12
1973	F1342-0079	-8.357	-0.246	-2.805	-0.642	-50.322	-6.561
1974	F3144-0072	-8.356	-0.261	-2.799	-1.203	-41.935	-12.315
1975	F3235-1206	-8.356	-0.279	-2.832	-0.917	-39.929	-11.567
1976	F6506-2281	-8.355	-0.309	-3.893	-0.658	-41.446	-9.152
1977	F3164-0112	-8.355	-0.279	-2.595	-0.869	-42.199	-8.417
1978	F3235-1006	-8.354	-0.261	-2.623	-0.683	-49.767	-8.017
1979	F3260-0137	-8.354	-0.298	-2.332	-0.829	-40.445	-10.093
1980	F0570-0350	-8.353	-0.278	-2.915	-0.755	-45.602	-6.143
1981	F0648-0365	-8.353	-0.246	-3.721	-0.32	-60.49	-4.931
1982	F1051-0092	-8.353	-0.278	-3.506	-0.613	-46.645	-7.517
1983	F2437-0159	-8.353	-0.269	-2.889	-1.207	-44.256	-8.852
1984	F0570-0363	-8.353	-0.288	-2.687	-0.658	-45.846	-7.601
1985	F2636-0400	-8.351	-0.246	-3.648	-0.613	-47.293	-8.142
1986	F3235-0524	-8.351	-0.269	-3.005	-0.595	-40.715	-8.904
1987	F2636-0133	-8.351	-0.269	-3.255	-0.676	-41.011	-8.469
1988	asinex8412	-8.35	-0.269	-2.867	-0.62	-52.823	-7.576
1989	F1883-1351	-8.35	-0.226	-3.059	-0.868	-52.954	-10.59
1990	F3382-5664	-8.35	-0.253	-3.454	-0.84	-51.423	-9.79
1991	F0648-0638	-8.349	-0.246	-3.082	-0.915	-54.939	-7.662
1992	F3289-0917	-8.349	-0.309	-2.323	-0.861	-41.72	-9.062
1993	F0612-0028	-8.349	-0.334	-3.161	-0.672	-41.682	-10.556
1994	asinex6663	-8.348	-0.309	-3.103	-0.68	-40.731	-13.361
1995	F0612-0110	-8.348	-0.321	-3.064	-0.621	-42.374	-8.221
1996	F0570-0076	-8.348	-0.298	-2.668	-0.658	-45.654	-8.116
1997	F1889-0586	-8.348	-0.278	-2.952	-0.649	-43.302	-10.009
1998	F2692-0725	-8.348	-0.269	-3.544	-0.613	-48.326	-7.471
[truncated: 45,070 more rows]
