# Supplementary material for: Antiviral drug discovery by targeting the SARS-CoV-2 polyprotein processing by inhibition of the main protease
Source: PeerJ. 2022 Feb 8;10:e12929. doi: 10.7717/peerj.12929 (PMC8833224; doi:10.7717/peerj.12929)
Supplement: Supplemental Information 2 [file peerj-10-12929-s002.xlsx]

## Sheet: Table 1
Results of XP docking against SARS CoV-2 Mpro
Entry Name	docking score	glide ligand efficiency	glide lipo	glide hbond	glide evdw	glide ecoul	glide energy
Rutin (Rutoside)	-11.782	-0.274	-2.616	-0.16	-47.644	-27.842	-75.487
(-)-Epigallocatechin gall	-11.567	-0.351	-2.906	-0.645	-34.898	-24.049	-58.947
Sennoside A	-10.768	-0.174	-2.128	-0.144	-39.107	-18.624	-57.731
compoundasinx.65	-9.859	-0.352	-2.452	-1.33	-40.129	-8.129	-48.258
(-)-Epicatechin gallate	-9.856	-0.308	-2.932	-0.629	-38.472	-23.594	-62.066
compoundasinx.173	-9.298	-0.282	-3.108	-0.655	-40.56	-12.071	-52.631
Alpha-Mangostin	-9.144	-0.305	-3.683	-0.832	-42.117	-8.794	-50.912
compoundasinx.40	-8.931	-0.288	-3.816	-0.541	-40.098	-13.795	-53.892
Glycitin	-8.825	-0.276	-2.962	-0.32	-32.439	-15.385	-47.825
Birinapant (TL32711)	-8.808	-0.152	-3.669	-0.459	-60.317	-14.059	-74.377
F2583-0433	-8.797	-0.293	-2.968	-1.201	-42.873	-17.076	-59.949
Atazanavir	-8.751	-0.35	-2.171	-0.741	-36.607	-16.512	-53.119
compoundasinx.108	-8.717	-0.281	-4.285	-0.955	-44.871	-10.538	-55.409
compoundasinx.111	-8.702	-0.281	-3.609	-0.582	-44.863	-11.252	-56.115
compoundasinx.77	-8.691	-0.322	-3.522	-0.45	-42.526	-8.726	-51.252
compoundasinx.20	-8.653	-0.288	-3.132	-1.192	-47.955	-8.49	-56.444
F3234-0818	-8.645	-0.298	-3.033	-0.899	-43.907	-12.295	-56.202
compoundasinx.179	-8.635	-0.279	-2.47	-0.857	-38.514	-13.191	-51.705
compoundasinx.28	-8.59	-0.26	-4.472	-0.561	-47.106	-4.684	-51.79
F5599-1046	-8.566	-0.317	-2.281	-0.795	-40.183	-15.353	-55.536
F3235-1255	-8.542	-0.305	-3.096	-1.027	-42.491	-17.349	-59.839
compoundasinx.36	-8.532	-0.294	-2.364	-1.322	-44.063	-14.69	-58.753
F2583-0307	-8.506	-0.293	-2.991	-1.203	-42.024	-17.341	-59.365
compoundasinx.199	-8.492	-0.327	-3.574	-0.786	-36.064	-16.501	-52.565
compoundasinx.286	-8.492	-0.293	-3.723	-0.606	-46.298	-9.316	-55.614
compoundasinx.76	-8.458	-0.338	-3.338	-0.796	-42.936	-10.219	-53.156
compoundasinx.117	-8.455	-0.313	-3.103	-0.68	-46.402	-6.964	-53.366
compoundasinx.83	-8.439	-0.256	-3.267	-0.647	-48.02	-9.955	-57.975
compoundasinx.172	-8.433	-0.301	-3.261	-0.653	-47.234	-5.92	-53.154
compoundasinx.62	-8.427	-0.351	-2.923	-1.102	-34.283	-14.922	-49.204
compoundasinx.22	-8.409	-0.323	-2.157	-1.324	-38.543	-14.324	-52.867
compoundasinx.218	-8.409	-0.255	-4.299	-0.369	-44.223	-11.83	-56.053
compoundasinx.35	-8.378	-0.254	-3.644	-0.736	-39.472	-12.855	-52.327
F2583-0037	-8.373	-0.299	-3.046	-0.961	-47.17	-11.872	-59.042
compoundasinx.182	-8.349	-0.298	-3.076	-0.68	-46.664	-8.469	-55.133
compoundasinx.50	-8.344	-0.288	-3.838	-0.76	-45.688	-9.849	-55.537
F2583-0443	-8.332	-0.278	-2.989	-0.854	-49.237	-12.215	-61.452
F2583-0127	-8.327	-0.269	-2.996	-0.875	-52.509	-12.54	-65.049
F2583-0444	-8.291	-0.276	-2.971	-0.869	-49.271	-11.831	-61.102
F3164-0489	-8.27	-0.258	-3.247	-1.174	-40.567	-14.199	-54.766
F2583-0375	-8.269	-0.276	-2.933	-0.868	-49.263	-11.709	-60.972
F2583-0045	-8.261	-0.275	-3.043	-0.898	-51.15	-11.223	-62.374
compoundasinx.249	-8.258	-0.295	-2.839	-0.848	-47.541	-8.574	-56.115
F1191-0058	-8.253	-0.266	-2.946	-0.873	-46.274	-11.94	-58.213
compoundasinx.55	-8.246	-0.258	-4.455	-0.4	-36.458	-10.362	-46.82
compoundasinx.128	-8.24	-0.25	-4.894	-0.148	-51.294	-2.996	-54.29
F3235-1268	-8.238	-0.294	-3.283	-1.017	-39.505	-16.723	-56.228
F2583-0496	-8.233	-0.266	-2.972	-0.863	-50.731	-11.457	-62.189
compoundasinx.18	-8.203	-0.273	-4.117	-0.859	-50.517	-10.536	-61.052
compoundasinx.6	-8.195	-0.293	-4.113	-0.941	-44.679	-8.24	-52.919
F2583-0319	-8.15	-0.281	-2.97	-0.868	-46.67	-11.777	-58.447
F2583-0495	-8.117	-0.262	-2.979	-0.855	-50.475	-12.19	-62.666
F2583-0128	-8.115	-0.262	-3.118	-0.807	-49.708	-12.16	-61.868
compoundasinx.227	-8.109	-0.262	-3.122	-0.689	-45.512	-9.213	-54.725
F2542-0127	-8.101	-0.312	-3.197	-0.921	-41.858	-11.116	-52.974
compoundasinx.119	-8.1	-0.27	-4.157	-0.604	-47.219	-5.424	-52.643
compoundasinx.239	-8.097	-0.279	-2.769	-0.756	-28.241	-12.937	-41.178
F2583-0033	-8.095	-0.289	-2.959	-0.856	-47.653	-12.047	-59.7
F2583-0318	-8.095	-0.279	-2.96	-0.865	-45.03	-11.902	-56.932
F2583-0041	-8.079	-0.289	-2.994	-0.802	-48.808	-10.21	-59.018
compoundasinx.141	-8.057	-0.35	-2.697	-1.069	-33.117	-13.422	-46.538
F1873-1644	-8.057	-0.278	-3.927	-0.903	-46.968	-11.04	-58.008
F3234-1417	-8.049	-0.298	-3.027	-0.811	-46.915	-10.095	-57.01
compoundasinx.7	-8.042	-0.259	-4.371	-0.868	-50.278	-11.331	-61.609
F2583-0034	-8.037	-0.287	-2.859	-0.82	-47.342	-11.348	-58.69
F2583-0115	-8.034	-0.277	-2.951	-0.854	-48.389	-12.249	-60.639
F3235-0489	-8.029	-0.287	-3.143	-0.82	-45.862	-10.849	-56.71
F2583-0038	-8.025	-0.287	-3.035	-0.766	-46.644	-11.545	-58.189
compoundasinx.166	-8.016	-0.297	-3.101	-0.683	-40.591	-8.551	-49.142
compoundasinx.151	-8.011	-0.297	-2.912	-0.707	-36.525	-12.535	-49.06
compoundasinx.101	-8.005	-0.25	-3.216	-0.893	-45.934	-7.011	-52.945
F3234-1534	-8.004	-0.286	-3.011	-0.82	-44.759	-10.417	-55.177
compoundasinx.49	-7.989	-0.285	-3.418	-0.745	-45.718	-9.212	-54.93
F2583-0116	-7.98	-0.275	-2.975	-0.822	-47.128	-10.382	-57.51
F3234-1332	-7.952	-0.295	-3.022	-0.929	-36.564	-9.767	-46.331
F3164-0037	-7.95	-0.274	-2.943	-0.827	-46.151	-10.52	-56.671
compoundasinx.190	-7.938	-0.283	-2.142	-0.627	-38.955	-8.618	-47.573
F2542-0220	-7.937	-0.305	-3.313	-0.769	-39.992	-10.648	-50.64
F3124-0149	-7.935	-0.294	-3.408	-0.767	-41.829	-10.531	-52.36
F3406-6584	-7.93	-0.248	-3.248	-1.14	-46.259	-11.185	-57.443
F2542-0221	-7.916	-0.293	-3.233	-0.784	-43.605	-8.858	-52.462
F3164-0560	-7.915	-0.317	-2.705	-0.797	-44.024	-11.298	-55.322
compoundasinx.146	-7.914	-0.317	-2.254	-0.967	-42.916	-11.696	-54.612
compoundasinx.159	-7.911	-0.283	-3.785	-0.693	-45.525	-9.113	-54.638
F2583-0120	-7.909	-0.273	-2.931	-0.752	-47.414	-11.109	-58.523
compoundasinx.82	-7.903	-0.247	-3.656	-0.698	-44.074	-11.742	-55.815
compoundasinx.189	-7.903	-0.247	-2.816	-0.608	-45.264	-8.697	-53.961
F3234-1333	-7.88	-0.292	-2.751	-0.908	-43.061	-10.782	-53.843
compoundasinx.78	-7.877	-0.292	-3.489	-0.773	-45.583	-8.311	-53.894
F2583-0119	-7.869	-0.271	-3.067	-0.763	-47.692	-11.608	-59.3
compoundasinx.41	-7.868	-0.254	-3.671	-0.573	-50.877	-7.19	-58.067
compoundasinx.37	-7.861	-0.291	-3.086	-0.941	-38.177	-8.915	-47.091
F3234-1543	-7.855	-0.281	-2.91	-0.816	-43.774	-10.767	-54.541
F3024-0018	-7.849	-0.302	-2.824	-0.808	-45.931	-9.808	-55.74
F2013-0680	-7.844	-0.261	-2.976	-0.78	-49.571	-10.711	-60.282
F3164-0370	-7.84	-0.27	-2.968	-1.199	-40.091	-14.628	-54.719
compoundasinx.26	-7.837	-0.28	-3.983	-0.839	-45.297	-8.546	-53.843
F2542-0063	-7.835	-0.313	-3.214	-0.819	-39.851	-11.039	-50.89
F3235-0012	-7.834	-0.27	-2.989	-0.979	-44.274	-15.455	-59.729
compoundasinx.11	-7.811	-0.252	-2.527	-1.237	-43.147	-13.892	-57.039
compoundasinx.31	-7.803	-0.236	-4.525	-0.328	-49.432	-6.608	-56.04
compoundasinx.209	-7.794	-0.278	-2.538	-0.378	-32.763	-13.056	-45.819
compoundasinx.193	-7.793	-0.269	-3.865	-0.697	-43.211	-6.221	-49.432
compoundasinx.242	-7.792	-0.289	-2.997	-0.673	-39.989	-10.587	-50.576
F3164-0600	-7.784	-0.299	-2.634	-0.893	-47.8	-10.791	-58.591
compoundasinx.156	-7.783	-0.251	-2.252	-0.359	-48.621	-13.812	-62.433
F3235-0704	-7.778	-0.268	-2.895	-0.806	-47.076	-10.396	-57.472
compoundasinx.56	-7.773	-0.278	-3.333	-0.671	-38.837	-10.501	-49.338
F1889-0217	-7.761	-0.25	-3.352	-1.273	-49.819	-9.574	-59.392
F2542-0031	-7.758	-0.31	-3.269	-0.77	-38.667	-10.641	-49.309
compoundasinx.219	-7.752	-0.25	-3.617	-0.598	-40.639	-8.446	-49.085
compoundasinx.19	-7.752	-0.242	-3.164	-0.655	-52.627	-8.462	-61.09
F2542-0251	-7.75	-0.298	-3.153	-0.786	-39.751	-10.941	-50.692
compoundasinx.87	-7.749	-0.235	-4.048	-0.526	-51.55	-6.854	-58.404
F3234-1375	-7.748	-0.287	-2.723	-0.893	-43.072	-10.604	-53.676
F3164-0097	-7.747	-0.258	-2.984	-0.831	-46.369	-10.089	-56.458
F2542-0128	-7.745	-0.287	-3.213	-0.921	-41.598	-10.987	-52.585
compoundasinx.94	-7.745	-0.25	-3.389	-0.903	-42.238	-11.187	-53.426
compoundasinx.162	-7.741	-0.287	-2.974	-0.683	-45.714	-8.767	-54.481
F2013-0049	-7.733	-0.276	-2.968	-0.83	-46.704	-9.381	-56.085
compoundasinx.255	-7.731	-0.249	-3.537	-0.623	-48.903	-4.369	-53.272
compoundasinx.265	-7.729	-0.242	-3.968	-0.309	-38.792	-10.37	-49.163
F3124-0102	-7.728	-0.297	-2.988	-0.926	-38.383	-11.237	-49.62
compoundasinx.266	-7.725	-0.249	-3.154	-0.63	-47.404	-8.777	-56.181
compoundasinx.15	-7.718	-0.257	-3.732	-0.857	-48.033	-9.112	-57.145
F3235-0002	-7.712	-0.266	-2.999	-0.989	-43.472	-11.501	-54.973
F2542-0943	-7.684	-0.274	-3.537	-0.793	-41.864	-11.378	-53.243
F3235-0293	-7.679	-0.274	-2.861	-0.799	-47.348	-9.417	-56.765
compoundasinx.269	-7.664	-0.307	-2.25	-0.41	-42.088	-10.221	-52.31
F3234-1575	-7.659	-0.274	-3.216	-0.616	-50.616	-8.277	-58.893
compoundasinx.126	-7.659	-0.264	-2.871	-0.62	-33.645	-17.236	-50.881
F3234-1584	-7.656	-0.273	-3.105	-0.691	-50.002	-8.87	-58.872
F2583-0042	-7.654	-0.273	-2.947	-0.827	-38.636	-10.428	-49.065
F2013-0710	-7.652	-0.283	-2.914	-0.705	-45.001	-9.855	-54.856
compoundasinx.72	-7.646	-0.232	-3.708	-0.838	-54.672	-4.836	-59.508
F3124-0056	-7.644	-0.283	-3.642	-0.595	-42.177	-8.226	-50.403
compoundasinx.100	-7.629	-0.272	-1.915	-1.19	-33.404	-18.163	-51.567
F2013-0056	-7.627	-0.282	-2.834	-0.798	-43.686	-10.11	-53.795
compoundasinx.27	-7.625	-0.293	-3.342	-0.925	-36.367	-13.598	-49.965
F3124-0418	-7.619	-0.272	-3.614	-0.613	-47.679	-7.378	-55.057
F1892-0579	-7.618	-0.263	-2.815	-0.778	-48.785	-8.509	-57.294
compoundasinx.105	-7.615	-0.231	-3.078	-0.916	-42.25	-11.145	-53.395
Loratadine	-7.612	-0.282	-3.631	-0.3	-44.698	-6.455	-51.154
compoundasinx.134	-7.601	-0.292	-1.968	-0.634	-26.267	-21.127	-47.394
compoundasinx.277	-7.599	-0.253	-3.303	-0.665	-42.021	-11.752	-53.773
F3124-0150	-7.586	-0.271	-3.484	-0.789	-42.114	-10.889	-53.003
compoundasinx.231	-7.584	-0.245	-1.767	-1.14	-38.458	-14.814	-53.272
compoundasinx.267	-7.576	-0.23	-4.606	-0.16	-51.7	-3.086	-54.787
F3024-0007	-7.572	-0.27	-3.133	-0.607	-36.629	-10.001	-46.63
F3235-0529	-7.567	-0.28	-2.964	-0.769	-43.857	-10.163	-54.02
compoundasinx.201	-7.563	-0.315	-3.082	-0.864	-36.019	-6.906	-42.925
compoundasinx.14	-7.557	-0.244	-3.009	-0.829	-47.944	-7.813	-55.757
compoundasinx.268	-7.556	-0.236	-4.831	-0.099	-48.599	-3.307	-51.906
F2542-0285	-7.546	-0.279	-3.123	-0.793	-40.491	-10.904	-51.394
F5835-0104	-7.545	-0.279	-3.227	-0.651	-40.999	-9.238	-50.237
compoundasinx.145	-7.54	-0.29	-3.195	-0.946	-42.85	-6.885	-49.735
compoundasinx.241	-7.53	-0.29	-3.052	-0.767	-36.605	-7.741	-44.345
F3124-0065	-7.526	-0.269	-3.724	-0.596	-46.964	-7.921	-54.885
compoundasinx.23	-7.518	-0.301	-1.922	-1.179	-37.817	-11.106	-48.923
compoundasinx.45	-7.517	-0.278	-3.489	-0.684	-45.082	-8.942	-54.023
compoundasinx.74	-7.517	-0.259	-4.119	-0.481	-36.217	-8.07	-44.287
F2583-0123	-7.511	-0.259	-2.946	-0.855	-40.82	-10.413	-51.233
F3164-0488	-7.511	-0.235	-3.656	-0.785	-44.661	-10.735	-55.396
compoundasinx.127	-7.507	-0.235	-3.811	-0.789	-54.137	-6.177	-60.314
compoundasinx.61	-7.496	-0.25	-4.214	-0.589	-48.447	-4.902	-53.349
compoundasinx.2	-7.495	-0.242	-2.832	-1.229	-42.808	-8.402	-51.21
compoundasinx.88	-7.494	-0.242	-2.901	-0.743	-53.512	-13.885	-67.397
F3124-0055	-7.484	-0.288	-3.663	-0.513	-42.389	-8.406	-50.795
F5857-2313	-7.469	-0.311	-2.733	-0.811	-39.527	-9.934	-49.46
F2583-0180	-7.465	-0.287	-2.626	-0.873	-40.786	-10.051	-50.837
compoundasinx.281	-7.464	-0.241	-3.369	-0.675	-52.301	-10.24	-62.542
compoundasinx.237	-7.464	-0.226	-3.677	-0.16	-44.66	-5.55	-50.211
F6444-1900	-7.463	-0.276	-2.702	-0.606	-45.912	-13.61	-59.522
compoundasinx.185	-7.461	-0.266	-3.107	-0.844	-42.749	-4.797	-47.546
compoundasinx.25	-7.457	-0.249	-3.949	-0.666	-46.985	-6.529	-53.514
compoundasinx.171	-7.455	-0.257	-3.594	-0.877	-47.315	-6.352	-53.667
F2013-0524	-7.451	-0.266	-2.871	-0.753	-46.969	-10.44	-57.409
compoundasinx.147	-7.436	-0.323	-2.404	-0.908	-33.825	-10.069	-43.894
F3235-0371	-7.435	-0.266	-2.668	-0.826	-46.712	-9.967	-56.679
F2542-0032	-7.432	-0.286	-3.339	-0.785	-43.991	-7.169	-51.159
compoundasinx.114	-7.43	-0.275	-2.862	-0.613	-40.34	-4.819	-45.159
compoundasinx.109	-7.43	-0.265	-3.495	-0.669	-41.891	-10.246	-52.137
compoundasinx.9	-7.424	-0.265	-3.579	-0.665	-48.801	-8.442	-57.243
compoundasinx.140	-7.421	-0.247	-1.776	-0.914	-48.218	-13.768	-61.985
compoundasinx.33	-7.415	-0.239	-3.167	-0.346	-44.004	-12.381	-56.385
compoundasinx.71	-7.412	-0.285	-2.645	-0.887	-44.064	-10.055	-54.119
compoundasinx.248	-7.41	-0.337	-2.475	-0.894	-33.079	-7.649	-40.728
compoundasinx.99	-7.404	-0.255	-2.085	-0.523	-41.163	-18.768	-59.93
compoundasinx.58	-7.389	-0.231	-4.45	-0.388	-46.659	-5.137	-51.797
F2542-0134	-7.386	-0.274	-3.208	-0.922	-38.766	-10.742	-49.508
compoundasinx.222	-7.386	-0.231	-4.74	-0.158	-48.719	-2.837	-51.556
F6247-1978	-7.379	-0.254	-3.325	-0.617	-45.926	-10.792	-56.718
compoundasinx.264	-7.366	-0.254	-4.207	-0.646	-41.957	-7.348	-49.305
compoundasinx.64	-7.363	-0.205	-2.781	-0.822	-47.851	-8.413	-56.264
compoundasinx.13	-7.359	-0.245	-3.183	-0.605	-48.311	-6.118	-54.429
compoundasinx.150	-7.356	-0.294	-3.341	-0.864	-41.635	-8.826	-50.461
F6556-4096	-7.331	-0.305	-2.96	-0.781	-36.909	-10.746	-47.656
F6556-7478	-7.329	-0.319	-3.09	-0.738	-37.5	-11.321	-48.822
compoundasinx.113	-7.327	-0.236	-2.746	-0.668	-38.894	-8.037	-46.931
compoundasinx.272	-7.323	-0.305	-1.361	-1.073	-34.003	-14.594	-48.597
compoundasinx.10	-7.321	-0.236	-3.24	-1.128	-39.562	-11.631	-51.193
F3234-0376	-7.317	-0.261	-3.076	-0.88	-36.632	-10.749	-47.381
compoundasinx.89	-7.308	-0.244	-2.45	-0.808	-42.945	-12.521	-55.466
compoundasinx.259	-7.296	-0.27	-2.986	-0.841	-42.336	-9.107	-51.442
compoundasinx.57	-7.287	-0.26	-3.356	-0.805	-45.207	-8.659	-53.867
F3164-0423	-7.276	-0.251	-3.59	-0.789	-47.624	-7.802	-55.427
F6439-0450	-7.272	-0.26	-2.605	-0.871	-48.025	-9.043	-57.069
compoundasinx.43	-7.268	-0.242	-3.962	-0.644	-52.203	-5.284	-57.487
compoundasinx.125	-7.26	-0.234	-4.248	-0.401	-38.66	-11.025	-49.685
F6252-4716	-7.221	-0.314	-3.033	-0.675	-35.104	-6.785	-41.889
compoundasinx.48	-7.221	-0.226	-2.849	-0.794	-46.927	-15.202	-62.129
F2583-0046	-7.215	-0.24	-3.128	-0.805	-50.947	-10.625	-61.573
compoundasinx.262	-7.178	-0.248	-3.017	-0.87	-46.286	-9.853	-56.139
F6231-0565	-7.178	-0.218	-2.717	-0.802	-49.708	-12.324	-62.033
compoundasinx.136	-7.174	-0.239	-2.782	-0.656	-45.635	-8.565	-54.2
F3235-1256	-7.163	-0.256	-3.415	-0.876	-45.131	-10.934	-56.064
Nelfinavir Mesylate	-7.16	-0.179	-3.935	-1.035	-49.495	-13.764	-63.259
Elvitegravir (GS-9137)	-7.158	-0.231	-3.51	-0.836	-40.895	-11.077	-51.972
compoundasinx.8	-7.154	-0.224	-2.903	-1.287	-43.934	-7.45	-51.384
compoundasinx.59	-7.151	-0.231	-2.829	-0.923	-41.964	-12.38	-54.344
compoundasinx.183	-7.145	-0.223	-4.058	-0.3	-39.842	-9.198	-49.04
F6456-1266	-7.14	-0.246	-3.457	-0.659	-47.834	-8.847	-56.681
compoundasinx.91	-7.137	-0.223	-2.875	-0.504	-50.392	-6.175	-56.567
compoundasinx.285	-7.127	-0.223	-2.79	-0.868	-51.358	-7.196	-58.554
compoundasinx.175	-7.118	-0.222	-3.005	-0.742	-41.941	-10.744	-52.686
compoundasinx.107	-7.113	-0.274	-3.041	-0.864	-38.465	-10.235	-48.7
compoundasinx.118	-7.107	-0.229	-3.501	-0.804	-49.196	-7.509	-56.706
compoundasinx.52	-7.098	-0.237	-3.31	-0.556	-36.536	-12.799	-49.336
compoundasinx.124	-7.098	-0.229	-3.705	-0.79	-40.726	-6.019	-46.745
F3124-0417	-7.088	-0.263	-3.697	-0.555	-37.124	-8.992	-46.116
compoundasinx.96	-7.078	-0.244	-3.26	-0.853	-41.096	-9.58	-50.675
compoundasinx.80	-7.077	-0.283	-2.164	-0.698	-40.293	-7.267	-47.56
Lopinavir (ABT-378)	-7.075	-0.154	-4.896	-0.16	-61.639	-7.717	-69.356
compoundasinx.130	-7.074	-0.253	-2.924	-0.702	-49.997	-5.842	-55.839
compoundasinx.257	-7.06	-0.252	-2.809	-0.575	-41.763	-12.948	-54.711
F3411-2664	-7.056	-0.252	-2.785	-0.824	-42.487	-11.127	-53.614
compoundasinx.135	-7.048	-0.227	-3.411	-0.678	-45.388	-11.803	-57.19
compoundasinx.177	-7.043	-0.235	-3.242	-0.731	-50.386	-7.308	-57.694
F3164-0530	-7.033	-0.32	-2.612	-0.927	-32.998	-9.402	-42.4
compoundasinx.205	-7.032	-0.213	-2.545	-0.614	-50.461	-7.479	-57.94
compoundasinx.229	-7.031	-0.27	-2.793	-0.61	-41.916	-8.176	-50.093
compoundasinx.53	-7.028	-0.281	-1.82	-0.819	-38.011	-14.979	-52.99
compoundasinx.32	-7.027	-0.22	-3.451	-0.872	-53.065	-6.563	-59.628
compoundasinx.153	-7.026	-0.227	-3.555	-0.461	-54.721	-5.088	-59.809
compoundasinx.226	-7.021	-0.27	-2.954	-0.93	-39.331	-9.574	-48.904
compoundasinx.103	-7.02	-0.234	-3.664	-0.79	-48.373	-9.946	-58.319
compoundasinx.16	-7.01	-0.234	-2.96	-0.944	-41.232	-10.537	-51.769
compoundasinx.68	-7.009	-0.212	-3.506	-0.868	-52.995	-8.117	-61.112
compoundasinx.211	-7.009	-0.212	-4.088	-0.455	-40.155	-13.019	-53.174
compoundasinx.164	-7.005	-0.318	-2.578	-0.849	-34.601	-7.554	-42.155
compoundasinx.168	-6.99	-0.25	-1.656	-0.875	-38.296	-11.366	-49.662
compoundasinx.17	-6.988	-0.206	-3.715	-0.42	-54.766	-4.5	-59.266
compoundasinx.69	-6.986	-0.25	-3.557	-0.873	-43.804	-10.615	-54.419
compoundasinx.102	-6.986	-0.225	-2.277	-0.829	-43.989	-12.134	-56.123
F6524-1497	-6.976	-0.249	-2.563	-0.662	-46.61	-10.395	-57.005
F6507-6056	-6.952	-0.257	-3.172	-0.695	-40.083	-6.984	-47.067
compoundasinx.54	-6.952	-0.24	-3.846	-0.638	-48.393	-9.419	-57.812
compoundasinx.116	-6.94	-0.224	-2.867	-0.62	-49.277	-4.085	-53.362
compoundasinx.192	-6.936	-0.267	-2.78	-0.681	-34.453	-11.023	-45.476
compoundasinx.254	-6.93	-0.21	-2.934	-0.585	-51.133	-7.856	-58.989
compoundasinx.194	-6.928	-0.231	-3.609	-0.749	-41.04	-7.676	-48.716
F6440-4280	-6.924	-0.277	-2.506	-0.87	-42.818	-10.405	-53.223
compoundasinx.204	-6.915	-0.277	-2.427	-0.896	-36.242	-9.122	-45.364
compoundasinx.165	-6.912	-0.23	-3.758	-0.625	-47.212	-5.741	-52.953
compoundasinx.137	-6.908	-0.256	-2.345	-1.12	-39.784	-15.798	-55.582
compoundasinx.247	-6.887	-0.237	-3.584	-0.667	-44.365	-7.391	-51.756
F6024-1038	-6.878	-0.287	-3.672	-0.607	-39.993	-6.574	-46.567
compoundasinx.184	-6.877	-0.264	-2.019	-0.789	-38.766	-15.309	-54.075
F6372-0723	-6.876	-0.287	-1.968	-0.847	-42.72	-10.849	-53.569
F6513-3736	-6.876	-0.222	-3.054	-0.611	-49.805	-7.178	-56.983
compoundasinx.63	-6.868	-0.222	-2.681	-1.148	-42.341	-14.306	-56.646
compoundasinx.283	-6.856	-0.254	-3.422	-0.852	-38.77	-4.372	-43.143
compoundasinx.86	-6.844	-0.221	-4.277	-0.31	-48.876	-7.701	-56.577
compoundasinx.197	-6.835	-0.214	-4.516	-0.164	-42.229	-7.513	-49.741
compoundasinx.215	-6.829	-0.253	-3.529	-0.658	-41.179	-5.871	-47.05
F3124-0018	-6.82	-0.244	-3.173	-0.929	-42.27	-11.273	-53.543
compoundasinx.167	-6.816	-0.213	-2.833	-0.701	-46.993	-8.147	-55.139
F6526-0159	-6.809	-0.31	-2.852	-0.59	-36.818	-7.385	-44.202
compoundasinx.132	-6.8	-0.219	-2.496	-0.808	-45.644	-8.108	-53.752
compoundasinx.256	-6.797	-0.272	-1.836	-0.401	-36.98	-10.337	-47.317
compoundasinx.178	-6.782	-0.234	-3.166	-0.464	-47.98	-4.252	-52.232
compoundasinx.243	-6.769	-0.212	-2.706	-0.678	-48.586	-7.642	-56.228
F3411-2671	-6.743	-0.233	-2.634	-0.686	-43.262	-11.66	-54.921
F3124-0164	-6.739	-0.204	-3.48	-0.795	-49.357	-10.909	-60.266
compoundasinx.274	-6.731	-0.24	-2.813	-0.646	-40.086	-6.259	-46.345
compoundasinx.235	-6.729	-0.249	-3.802	-0.49	-39.947	-4.964	-44.911
compoundasinx.139	-6.723	-0.249	-3.574	-0.658	-39.133	-6.409	-45.542
F2542-0132	-6.705	-0.239	-3.175	-0.925	-44.005	-11.168	-55.173
compoundasinx.38	-6.704	-0.319	-1.273	-1.351	-25.534	-15.517	-41.051
F3406-4580	-6.692	-0.223	-2.554	-0.866	-51.649	-11.154	-62.803
compoundasinx.238	-6.68	-0.215	-2.823	-0.864	-45.458	-10.158	-55.616
compoundasinx.181	-6.677	-0.223	-2.787	-0.745	-45.384	-4.199	-49.583
compoundasinx.133	-6.667	-0.208	-2.372	-1.197	-48.879	-9.31	-58.188
compoundasinx.30	-6.666	-0.23	-3.087	-0.76	-38.802	-12.293	-51.095
F3406-1602	-6.663	-0.208	-3.57	-0.819	-54.255	-5.612	-59.867
compoundasinx.123	-6.662	-0.202	-3.466	-0.916	-46.645	-7.775	-54.42
compoundasinx.39	-6.652	-0.222	-4.191	-0.414	-37.512	-9.973	-47.484
compoundasinx.12	-6.649	-0.208	-2.93	-0.88	-50.721	-8.863	-59.584
F2542-0262	-6.645	-0.208	-3.316	-0.793	-47.841	-10.896	-58.736
compoundasinx.42	-6.641	-0.229	-3.112	-0.868	-47.434	-7.1	-54.534
F6524-5827	-6.626	-0.276	-1.758	-0.616	-41.118	-10.29	-51.407
Ritonavir	-6.623	-0.132	-3.913	-0.273	-60.125	-7.906	-68.031
compoundasinx.213	-6.619	-0.221	-2.97	-0.511	-36.737	-11.159	-47.896
F3124-0057	-6.618	-0.236	-3.916	-0.517	-47.7	-7.556	-55.256
compoundasinx.93	-6.615	-0.213	-3.741	-0.76	-44.09	-6.092	-50.182
compoundasinx.228	-6.613	-0.207	-2.35	-0.81	-45.757	-9.43	-55.188
compoundasinx.230	-6.612	-0.22	-2.9	-0.467	-41.803	-6.143	-47.947
F3411-8412	-6.612	-0.207	-2.532	-0.679	-47.004	-10.975	-57.978
F6524-1209	-6.609	-0.254	-1.995	-0.696	-41.888	-7.399	-49.287
compoundasinx.207	-6.607	-0.228	-3.128	-0.541	-47.686	-6.894	-54.58
compoundasinx.258	-6.607	-0.22	-3.45	-0.434	-49.772	-6.244	-56.015
compoundasinx.158	-6.604	-0.236	-2.206	-0.699	-36.432	-14.043	-50.475
compoundasinx.234	-6.596	-0.213	-1.658	-1.03	-38.901	-15.253	-54.154
compoundasinx.253	-6.589	-0.275	-2.718	-0.724	-35.148	-7.612	-42.76
compoundasinx.106	-6.586	-0.22	-2.329	-1.124	-43.664	-7.386	-51.05
compoundasinx.263	-6.583	-0.263	-2.024	-0.923	-36.024	-10.132	-46.156
compoundasinx.138	-6.581	-0.219	-2.279	-1.015	-38.202	-11.421	-49.623
Licochalcone A	-6.574	-0.263	-3.023	-0.678	-33.811	-14.142	-47.953
compoundasinx.196	-6.573	-0.227	-2.708	-0.81	-34.554	-14.46	-49.014
compoundasinx.75	-6.569	-0.227	-2.712	-0.747	-48.563	-10.42	-58.984
compoundasinx.46	-6.559	-0.205	-3.735	-0.68	-52.652	-6.396	-59.049
compoundasinx.206	-6.553	-0.218	-2.457	-0.58	-40.597	-9.112	-49.709
compoundasinx.34	-6.55	-0.211	-3.164	-0.581	-52.5	-5.278	-57.778
compoundasinx.202	-6.544	-0.234	-2.871	-0.44	-35.785	-6.173	-41.958
compoundasinx.67	-6.539	-0.198	-3.294	-0.443	-46.206	-8.558	-54.764
compoundasinx.271	-6.535	-0.251	-2.16	-0.684	-37.059	-10.171	-47.23
compoundasinx.24	-6.523	-0.204	-3.89	-0.744	-48.869	-9.742	-58.611
compoundasinx.129	-6.522	-0.225	-3.148	-0.447	-45.975	-5.823	-51.798
compoundasinx.275	-6.511	-0.26	-2.849	-0.56	-44.116	-5.966	-50.082
compoundasinx.216	-6.506	-0.224	-2.964	-0.301	-46.356	-4.648	-51.004
compoundasinx.122	-6.502	-0.203	-3.228	-0.348	-44.89	-12.35	-57.239
F6469-1740	-6.498	-0.25	-2.457	-0.73	-45.752	-10.549	-56.301
compoundasinx.60	-6.493	-0.25	-3.161	-0.941	-40.302	-9.084	-49.386
F3406-6650	-6.493	-0.224	-3.129	-0.492	-42.097	-8.67	-50.767
F2542-0264	-6.474	-0.202	-3.277	-0.786	-47.434	-10.433	-57.867
compoundasinx.170	-6.448	-0.239	-3.629	-0.657	-35.488	-7.716	-43.204
F6559-0894	-6.436	-0.248	-2.503	-0.827	-38.874	-10.65	-49.524
F6521-8624	-6.401	-0.206	-3.605	-0.851	-50.091	-4.049	-54.139
compoundasinx.186	-6.398	-0.2	-3.277	-0.464	-48.832	-6.773	-55.605
compoundasinx.276	-6.396	-0.246	-3.012	-1.236	-33.663	-6.484	-40.147
compoundasinx.47	-6.39	-0.194	-3.294	-0.693	-49.845	-8.1	-57.944
F1873-2159	-6.345	-0.205	-3.664	-0.923	-47.75	-6.651	-54.401
compoundasinx.176	-6.344	-0.198	-3.228	-0.459	-51.033	-7.117	-58.15
F2542-0263	-6.336	-0.198	-3.209	-0.786	-45.95	-10.693	-56.642
F5476-0541	-6.334	-0.244	-2.959	-0.614	-38.079	-11.748	-49.828
F1191-0059	-6.328	-0.218	-3.129	-1.367	-44.234	-8.143	-52.376
compoundasinx.115	-6.327	-0.192	-3.301	-0.369	-45.831	-12.097	-57.928
F2583-0124	-6.312	-0.218	-3.009	-0.812	-42.258	-9.833	-52.091
compoundasinx.282	-6.283	-0.233	-2.227	-0.614	-40.364	-8.389	-48.753
compoundasinx.210	-6.27	-0.19	-3.44	-0.658	-48.632	-4.822	-53.454
compoundasinx.143	-6.257	-0.223	-2.684	-0.888	-40.554	-10.913	-51.466
compoundasinx.149	-6.238	-0.25	-2.862	-0.757	-39.586	-6.767	-46.352
F2774-6092	-6.236	-0.215	-2.966	-0.637	-45.799	-11.704	-57.503
F3235-1280	-6.203	-0.222	-3.13	-0.81	-37.487	-8.855	-46.342
compoundasinx.148	-6.199	-0.188	-3.07	-0.788	-46.547	-7.866	-54.413
compoundasinx.44	-6.195	-0.188	-3.243	-0.353	-45.352	-9.786	-55.138
compoundasinx.157	-6.183	-0.206	-3.78	-0.44	-51.152	-8.736	-59.888
compoundasinx.250	-6.182	-0.247	-2.979	-0.544	-39.676	-5.824	-45.5
compoundasinx.187	-6.175	-0.257	-2.641	-0.596	-35.883	-5.355	-41.238
compoundasinx.84	-6.166	-0.228	-2.191	-1.358	-32.085	-14.873	-46.958
compoundasinx.270	-6.162	-0.212	-2.878	-0.616	-45.506	-5.872	-51.378
compoundasinx.161	-6.157	-0.192	-4.277	-0.353	-44.274	-10.961	-55.235
compoundasinx.280	-6.155	-0.22	-3.014	-0.866	-41.651	-6.526	-48.176
compoundasinx.144	-6.154	-0.256	-2.196	-0.754	-34.47	-8.111	-42.581
compoundasinx.221	-6.154	-0.246	-2.255	-0.609	-39.045	-7.8	-46.845
compoundasinx.208	-6.138	-0.267	-2.062	-0.926	-37.478	-5.784	-43.262
compoundasinx.79	-6.129	-0.204	-3.12	-0.933	-39.813	-14.23	-54.043
compoundasinx.85	-6.125	-0.236	-2.566	-0.797	-35.262	-8.379	-43.641
compoundasinx.188	-6.083	-0.21	-3.63	-0.512	-44.351	-6.733	-51.083
compoundasinx.104	-6.08	-0.243	-1.32	-1.394	-32.897	-9.797	-42.695
F2542-0295	-6.06	-0.189	-3.234	-0.781	-46.635	-11.186	-57.821
F3411-7681	-6.055	-0.209	-2.582	-0.682	-47.644	-9.071	-56.716
compoundasinx.278	-6.051	-0.263	-2.43	-0.525	-37.313	-8.149	-45.462
compoundasinx.217	-6.044	-0.275	-2.614	-0.68	-37.589	-5.445	-43.035
compoundasinx.279	-6.025	-0.232	-2.638	-0.734	-34.504	-8.032	-42.536
compoundasinx.81	-6	-0.24	-2.165	-0.766	-38.81	-8.072	-46.883
F3411-7353	-5.997	-0.2	-2.473	-0.67	-43.513	-9.918	-53.431
compoundasinx.4	-5.991	-0.2	-2.686	-1.327	-47.862	-9.35	-57.212
compoundasinx.51	-5.944	-0.18	-3.3	-0.618	-48.374	-7.063	-55.437
compoundasinx.152	-5.923	-0.191	-3.96	-0.626	-45.869	-8.933	-54.802
compoundasinx.90	-5.916	-0.179	-2.48	-0.604	-43.992	-14.802	-58.795
compoundasinx.70	-5.914	-0.179	-3.593	-0.621	-46.979	-11.29	-58.269
F6523-2820	-5.912	-0.269	-2.261	-0.718	-39.35	-8.591	-47.94
F3260-0937	-5.907	-0.257	-2.046	-0.668	-32.174	-7.816	-39.989
compoundasinx.154	-5.903	-0.328	-2.38	-0.613	-30.45	-7.138	-37.587
compoundasinx.66	-5.899	-0.19	-4.07	-0.631	-42.997	-9.113	-52.11
Tofaci8nib citrate (CP-6	90550 citr-a5t.e8)9	-0.256	-1.934	-0.712	-34.809	-8.516	-43.325
F6559-0746	-5.88	-0.203	-2.622	-0.608	-39.494	-7.932	-47.426
compoundasinx.198	-5.879	-0.267	-2.544	-0.502	-28.861	-14.041	-42.902
compoundasinx.244	-5.878	-0.184	-2.636	-0.724	-51.112	-5.713	-56.825
compoundasinx.120	-5.84	-0.201	-2.358	-0.82	-49.798	-8.072	-57.87
compoundasinx.5	-5.832	-0.182	-3.504	-0.838	-49.753	-6.72	-56.473
compoundasinx.174	-5.816	-0.201	-2.887	-0.845	-42.603	-6.597	-49.199
compoundasinx.225	-5.806	-0.2	-2.652	-0.842	-46.245	-7.841	-54.086
compoundasinx.180	-5.803	-0.232	-2.258	-0.9	-29.028	-7.828	-36.856
F2542-0294	-5.788	-0.181	-3.215	-0.781	-40.759	-11.579	-52.338
F3411-7565	-5.766	-0.206	-2.487	-0.671	-47.534	-7.686	-55.22
compoundasinx.160	-5.757	-0.192	-2.63	-0.6	-44.708	-8.078	-52.785
compoundasinx.195	-5.747	-0.192	-3.718	-0.594	-41.269	-4.371	-45.64
compoundasinx.98	-5.746	-0.213	-1.685	-0.962	-42.721	-7.44	-50.161
compoundasinx.273	-5.729	-0.229	-3.166	-0.613	-36.986	-11.241	-48.226
compoundasinx.220	-5.724	-0.197	-2.421	-0.625	-45.254	-6.572	-51.826
F2542-0293	-5.723	-0.179	-3.282	-0.787	-46.548	-11.252	-57.8
F3411-6782	-5.72	-0.249	-2.014	-0.869	-38.025	-6.587	-44.612
F6474-7232	-5.672	-0.247	-2.578	-1.275	-41.624	-4.789	-46.414
compoundasinx.169	-5.658	-0.189	-2.258	-0.811	-33.707	-13.528	-47.234
F6494-0176	-5.644	-0.297	-2.188	-0.951	-32.248	-8.06	-40.309
compoundasinx.3	-5.638	-0.194	-3.113	-1.276	-41.583	-11.374	-52.958
compoundasinx.260	-5.539	-0.205	-2.27	-0.606	-38.339	-6.462	-44.802
compoundasinx.73	-5.519	-0.167	-3.256	-0.343	-50.826	-6.944	-57.769
Cobicistat (GS-9350)	-5.518	-0.102	-4.477	-0.259	-54.688	-14.251	-68.939
F3411-7531	-5.508	-0.167	-2.964	-0.554	-46.51	-8.651	-55.16
F6506-2281	-5.455	-0.202	-3.893	-0.658	-47.446	-5.23	-52.675
F3406-8111	-5.407	-0.174	-2.53	-0.601	-49.668	-9.174	-58.842
F6252-1820	-5.406	-0.186	-3.281	-0.575	-42.746	-14.937	-57.683
compoundasinx.251	-5.373	-0.256	-1.306	-0.942	-29.772	-6.778	-36.55
compoundasinx.142	-5.373	-0.185	-2.933	-0.468	-33.013	-10.614	-43.627
F3411-7549	-5.355	-0.173	-2.641	-0.671	-48.209	-8.121	-56.33
F6444-1920	-5.297	-0.183	-2.585	-0.891	-47.791	-9.322	-57.114
compoundasinx.21	-5.291	-0.189	-3.072	-0.96	-40.592	-12.48	-53.072
compoundasinx.236	-5.283	-0.196	-3.194	-0.407	-41.168	-10.504	-51.672
compoundasinx.155	-5.222	-0.18	-1.723	-1.129	-45.369	-8.905	-54.274
compoundasinx.245	-5.211	-0.227	-1.781	-1.341	-41.324	-7.186	-48.511
compoundasinx.29	-5.183	-0.179	-3.411	-0.884	-39.857	-11.026	-50.882
compoundasinx.191	-5.137	-0.205	-3.188	-0.863	-32.879	-6.412	-39.291
compoundasinx.252	-5.049	-0.163	-3.216	-0.32	-43.688	-10.144	-53.832
compoundasinx.284	-4.921	-0.154	-2.804	-0.4	-47.87	-7.387	-55.257
compoundasinx.95	-4.916	-0.159	-3.115	-0.614	-52.829	-6.255	-59.084
compoundasinx.112	-4.868	-0.232	-2.144	-0.8	-32.98	-11.365	-44.345
compoundasinx.246	-4.863	-0.18	-2.569	-0.676	-38.083	-16	-54.083
F6529-2129	-4.8	-0.15	-3.124	-0.606	-41.321	-3.318	-44.639
F2542-0359	-4.792	-0.145	-3.185	-0.833	-45.725	-5.323	-51.047
compoundasinx.121	-4.786	-0.184	-2.597	-0.709	-37.211	-17.605	-54.815
compoundasinx.214	-4.745	-0.176	-3.33	-0.713	-41.062	-11.345	-52.406
F3407-3977	-4.608	-0.115	-3.335	-0.366	-49.828	-9.779	-59.607
compoundasinx.110	-4.57	-0.169	-2.728	-0.77	-40.298	-5.891	-46.189
compoundasinx.212	-4.478	-0.149	-3.592	-0.604	-44.86	-10.57	-55.43
compoundasinx.232	-4.431	-0.193	-2.13	-0.817	-26.647	-19.508	-46.155
compoundasinx.261	-4.326	-0.18	-2.613	-0.874	-31.445	-10.738	-42.183
compoundasinx.224	-4.287	-0.171	-2.574	-0.919	-33.437	-17.189	-50.626
compoundasinx.240	-4.061	-0.131	-2.794	-0.672	-48.464	-8.931	-57.395
compoundasinx.200	-3.993	-0.166	-2.81	-0.839	-31.263	-9.578	-40.841
compoundasinx.131	-3.856	-0.129	-2.994	-0.797	-44.542	-11.477	-56.019
compoundasinx.97	-3.854	-0.143	-3.135	-0.887	-42.256	-9.841	-52.097
Usnic acid	-3.779	-0.151	-2.108	-0.906	-35.332	-11.232	-46.565
compoundasinx.203	-3.752	-0.15	-2.876	-0.876	-34.425	-9.339	-43.764
compoundasinx.163	-3.561	-0.155	-1.57	-1.208	-35.701	-8.244	-43.944
F2542-0354	-3.535	-0.118	-3.184	-0.869	-42.741	-11.58	-54.321
compoundasinx.233	-3.035	-0.145	-1.855	-0.641	-30.762	-10.115	-40.877
compoundasinx.223	-2.85	-0.092	-3.211	0	-40.995	-12.879	-53.874
compoundasinx.92	-2.827	-0.055	-3.531	0	-67.619	-8.899	-76.518
Asunaprevir	-1.472	-0.029	-4.329	-0.518	-56.743	-14.024	-70.767
