# Supplementary material for: Antiviral drug discovery by targeting the SARS-CoV-2 polyprotein processing by inhibition of the main protease
Source: PeerJ. 2022 Feb 8;10:e12929. doi: 10.7717/peerj.12929 (PMC8833224; doi:10.7717/peerj.12929)
Supplement: Supplemental Information 3 [file peerj-10-12929-s003.xlsx]

## Sheet: Sheet1
	Plaque number/mL(Log10)
percent of inhibition
				percent
DMSO	6.581	6.621	6.588
Birinapant (10 µM)	6.456	6.395	6.337	37
Atazanavir (10 µM)	6.522	6.752	6.626
IC50
Birinapant		Plaque number/mL(Log10)	IC50
concentration (µM)	50	5.49	17.6026
	25	5.8
	12.5	6.55
	6.25	6.77
	3.125	6.99
concentration (µM)	50	5.29	14.69
	25	5.32
	12.5	6.4
	6.25	6.71
	3.125	6.77
concentration (µM)	50	4.94	21.88
	25	5.48
	12.5	6.33
	6.25	6.54
	3.125	6.94
