# Supplementary material for: Antiviral drug discovery by targeting the SARS-CoV-2 polyprotein processing by inhibition of the main protease
Source: PeerJ. 2022 Feb 8;10:e12929. doi: 10.7717/peerj.12929 (PMC8833224; doi:10.7717/peerj.12929)
Supplement: Supplemental Information 11 [file peerj-10-12929-s011.xlsx]

## Sheet: RMSF
Residue no.	Alpha-Mangostin	Atazanavir	Birinapant	Lopinavir
1	0.4809	0.4654	0.4521	0.5213
2	0.3281	0.3451	0.2605	0.3318
3	0.1746	0.183	0.1424	0.2106
4	0.1615	0.1666	0.132	0.1797
5	0.1576	0.1462	0.1044	0.1541
6	0.1543	0.1551	0.085	0.1396
7	0.1408	0.129	0.0754	0.1115
8	0.1349	0.1206	0.0754	0.1019
9	0.1384	0.1184	0.0912	0.1218
10	0.1287	0.1005	0.085	0.1065
11	0.1389	0.1123	0.0859	0.1067
12	0.1603	0.1261	0.1214	0.1222
13	0.1241	0.0942	0.0759	0.0787
14	0.1252	0.0882	0.0682	0.0754
15	0.1073	0.0925	0.0768	0.0849
16	0.0928	0.0718	0.0579	0.0633
17	0.0976	0.0654	0.0545	0.0607
18	0.0812	0.0636	0.0534	0.0592
19	0.0923	0.0683	0.0569	0.0649
20	0.0761	0.0666	0.0578	0.0593
21	0.0989	0.0834	0.0744	0.0749
22	0.1125	0.1002	0.0847	0.0863
23	0.1642	0.1402	0.1267	0.131
24	0.175	0.1533	0.1417	0.1485
25	0.1196	0.1021	0.0943	0.0963
26	0.1042	0.0846	0.0773	0.0806
27	0.0872	0.0644	0.0638	0.0618
28	0.0736	0.0538	0.051	0.0536
29	0.0689	0.0615	0.0537	0.0585
30	0.0737	0.0561	0.048	0.0444
31	0.0726	0.0628	0.0481	0.0539
32	0.0848	0.0742	0.0556	0.063
33	0.1015	0.0929	0.0733	0.1006
34	0.0954	0.0918	0.0687	0.0858
35	0.0803	0.0802	0.0567	0.0667
36	0.0644	0.0642	0.0468	0.0486
37	0.0616	0.0605	0.046	0.0415
38	0.0525	0.0541	0.0516	0.0435
39	0.051	0.054	0.054	0.046
40	0.0596	0.0546	0.0648	0.0521
41	0.0654	0.0668	0.0849	0.0582
42	0.0874	0.089	0.0832	0.065
43	0.0951	0.0944	0.0916	0.0737
44	0.107	0.1174	0.1251	0.0877
45	0.153	0.1709	0.1883	0.1277
46	0.2044	0.1931	0.2598	0.154
47	0.2179	0.2088	0.2955	0.1987
48	0.1556	0.1778	0.2346	0.1911
49	0.1408	0.1391	0.2462	0.1988
50	0.1353	0.1757	0.2946	0.3069
51	0.1317	0.1667	0.2552	0.2584
52	0.1115	0.1212	0.2908	0.1939
53	0.1405	0.1437	0.2538	0.1312
54	0.1162	0.1123	0.2174	0.0946
55	0.1558	0.1535	0.2095	0.116
56	0.1522	0.1488	0.1891	0.124
57	0.1273	0.123	0.1537	0.1011
58	0.1297	0.1239	0.1363	0.1015
59	0.157	0.1537	0.1704	0.1254
60	0.1707	0.1578	0.1773	0.1219
61	0.1426	0.138	0.1398	0.1188
62	0.1537	0.147	0.1257	0.152
63	0.1276	0.1312	0.0994	0.1231
64	0.1477	0.1424	0.1114	0.1226
65	0.1329	0.1253	0.0995	0.1049
66	0.1096	0.1038	0.079	0.0843
67	0.1161	0.1005	0.0837	0.0902
68	0.0953	0.0817	0.0664	0.0734
69	0.1064	0.0892	0.0733	0.0791
70	0.1074	0.0936	0.0845	0.1003
71	0.1599	0.1324	0.1246	0.1374
72	0.1965	0.1688	0.1482	0.1601
73	0.1435	0.1319	0.1155	0.1296
74	0.1286	0.1131	0.0926	0.1021
75	0.108	0.096	0.0784	0.0887
76	0.1213	0.1077	0.0865	0.1074
77	0.1037	0.1008	0.0741	0.084
78	0.1185	0.1147	0.0789	0.0882
79	0.108	0.1115	0.0766	0.0827
80	0.0963	0.1016	0.0696	0.0746
81	0.0958	0.1043	0.0721	0.0789
82	0.0891	0.1096	0.0751	0.0751
83	0.1211	0.1293	0.1232	0.1216
84	0.0822	0.0891	0.0956	0.0903
85	0.0638	0.0694	0.0722	0.065
86	0.0616	0.0688	0.0623	0.0538
87	0.0618	0.071	0.0573	0.0508
88	0.0688	0.0786	0.0546	0.0528
89	0.0732	0.0793	0.0543	0.0567
90	0.0891	0.0931	0.063	0.0689
91	0.0958	0.094	0.0685	0.08
92	0.1223	0.1142	0.0928	0.1213
93	0.1206	0.114	0.1003	0.147
94	0.11	0.1025	0.0848	0.1207
95	0.0964	0.0876	0.0686	0.097
96	0.1225	0.1111	0.0942	0.1251
97	0.1283	0.1054	0.0954	0.1099
98	0.1098	0.0951	0.0764	0.0825
99	0.1221	0.1021	0.077	0.0856
100	0.1357	0.1159	0.0738	0.0875
101	0.12	0.1056	0.0683	0.0769
102	0.1198	0.1079	0.0731	0.0801
103	0.1068	0.0982	0.0678	0.0761
104	0.1107	0.1059	0.0707	0.0836
105	0.1054	0.1002	0.0738	0.0803
106	0.1097	0.1043	0.0722	0.0915
107	0.1153	0.1135	0.0774	0.0975
108	0.1206	0.1085	0.0701	0.0909
109	0.1311	0.1271	0.0775	0.093
110	0.1233	0.1222	0.07	0.0882
111	0.1268	0.1207	0.0677	0.0834
112	0.1109	0.1047	0.061	0.072
113	0.1092	0.1005	0.0589	0.0719
114	0.099	0.0885	0.0544	0.0677
115	0.1411	0.0898	0.0546	0.0707
116	0.2178	0.1161	0.0638	0.0787
117	0.1836	0.0938	0.0585	0.0699
118	0.2934	0.0912	0.0651	0.0787
119	0.3655	0.1175	0.0859	0.1018
120	0.4634	0.0876	0.0679	0.0801
121	0.3455	0.0906	0.0728	0.0878
122	0.3389	0.1018	0.0711	0.0833
123	0.2532	0.1503	0.0819	0.0961
124	0.184	0.1407	0.0849	0.1046
125	0.1358	0.1123	0.0674	0.0929
126	0.1319	0.1161	0.0671	0.0971
127	0.1267	0.1144	0.0679	0.0903
128	0.1242	0.1122	0.0694	0.0819
129	0.1207	0.1244	0.0744	0.0761
130	0.1056	0.101	0.0674	0.0757
131	0.1009	0.1053	0.0663	0.0855
132	0.1025	0.11	0.0694	0.0957
133	0.1008	0.106	0.0675	0.0893
134	0.0918	0.0986	0.0644	0.0779
135	0.0919	0.0944	0.0639	0.074
136	0.097	0.1095	0.0653	0.0753
137	0.1313	0.1328	0.0789	0.0907
138	0.1657	0.1421	0.0998	0.0997
139	0.228	0.1484	0.1118	0.1201
140	0.1834	0.1278	0.099	0.1045
141	0.2117	0.1345	0.1343	0.1184
142	0.2302	0.1105	0.1283	0.1179
143	0.2107	0.1015	0.0866	0.0921
144	0.1407	0.0783	0.0712	0.0787
145	0.0896	0.0561	0.054	0.0597
146	0.0645	0.0494	0.05	0.0503
147	0.0717	0.0578	0.0536	0.0536
148	0.0713	0.0598	0.0534	0.049
149	0.0913	0.0755	0.0555	0.0563
150	0.095	0.0891	0.0568	0.0659
151	0.1161	0.112	0.0755	0.0842
152	0.133	0.1308	0.0852	0.0936
153	0.1623	0.1619	0.1015	0.1333
154	0.1965	0.1945	0.122	0.1719
155	0.1782	0.1715	0.1077	0.1452
156	0.1409	0.1332	0.0785	0.0969
157	0.1209	0.1044	0.0651	0.0748
158	0.1124	0.1069	0.065	0.0753
159	0.0917	0.0848	0.0555	0.0609
160	0.0904	0.0886	0.0601	0.0627
161	0.0781	0.0695	0.0562	0.0506
162	0.0655	0.0577	0.0519	0.0418
163	0.0626	0.0566	0.0551	0.0477
164	0.0528	0.0568	0.0701	0.0539
165	0.0621	0.0633	0.0778	0.0646
166	0.0875	0.08	0.0827	0.076
167	0.109	0.091	0.085	0.0878
168	0.1521	0.1288	0.1088	0.1176
169	0.1607	0.1406	0.1075	0.1218
170	0.1415	0.1287	0.1062	0.1115
171	0.1043	0.1041	0.0798	0.0863
172	0.08	0.0824	0.0689	0.068
173	0.071	0.071	0.0645	0.0633
174	0.0642	0.0655	0.0617	0.0539
175	0.0656	0.0639	0.0601	0.051
176	0.0783	0.0754	0.0613	0.0581
177	0.0794	0.0759	0.0638	0.0608
178	0.0901	0.0928	0.0798	0.0785
179	0.0754	0.0778	0.0749	0.0656
180	0.0789	0.0822	0.0728	0.0722
181	0.0715	0.0721	0.0702	0.0676
182	0.0806	0.0803	0.0694	0.0695
183	0.0909	0.0883	0.0859	0.0871
184	0.0956	0.0897	0.0922	0.0969
185	0.0805	0.0743	0.0856	0.0866
186	0.0752	0.0745	0.0948	0.0904
187	0.0697	0.0753	0.095	0.0821
188	0.0904	0.087	0.1319	0.1323
189	0.1207	0.1158	0.1627	0.1488
190	0.1238	0.1211	0.1442	0.1334
191	0.1516	0.1426	0.1482	0.1487
192	0.1581	0.1145	0.1068	0.1086
193	0.268	0.1294	0.1073	0.1137
194	0.2802	0.1208	0.0985	0.1132
195	0.2182	0.1217	0.0917	0.1158
196	0.1716	0.1457	0.0944	0.1206
197	0.1216	0.1525	0.0879	0.1
198	0.1034	0.1251	0.0795	0.0877
199	0.0862	0.0979	0.0713	0.0695
200	0.08	0.0965	0.0698	0.0613
201	0.0619	0.0772	0.0589	0.0486
202	0.0682	0.0872	0.0596	0.053
203	0.0693	0.0772	0.0546	0.0471
204	0.0531	0.0612	0.0446	0.04
205	0.0515	0.0653	0.0398	0.0388
206	0.0706	0.078	0.0496	0.051
207	0.0754	0.0744	0.0511	0.0552
208	0.0702	0.0744	0.0471	0.0516
209	0.0817	0.0923	0.0552	0.0598
210	0.0962	0.0945	0.062	0.0744
211	0.1067	0.1039	0.07	0.0827
212	0.1178	0.1249	0.08	0.0844
213	0.1312	0.1366	0.0891	0.1033
214	0.1476	0.1456	0.0992	0.1221
215	0.1636	0.1658	0.1215	0.1302
216	0.1465	0.1565	0.1149	0.11
217	0.1453	0.1566	0.109	0.1104
218	0.1527	0.165	0.1148	0.1213
219	0.121	0.1307	0.0908	0.1009
220	0.1214	0.1374	0.0885	0.0942
221	0.133	0.1683	0.1131	0.1129
222	0.2507	0.1902	0.1343	0.1493
223	0.1831	0.1802	0.1389	0.1487
224	0.187	0.1642	0.1391	0.1382
225	0.1579	0.1484	0.1136	0.1275
226	0.1581	0.1662	0.121	0.1299
227	0.1423	0.1643	0.1167	0.1241
228	0.1475	0.1799	0.1288	0.1351
229	0.136	0.1499	0.1124	0.126
230	0.1171	0.1241	0.0991	0.1078
231	0.1195	0.1511	0.1205	0.1094
232	0.1532	0.1491	0.1318	0.1295
233	0.1492	0.1289	0.1316	0.1343
234	0.1115	0.1284	0.121	0.1086
235	0.1558	0.149	0.1271	0.1332
236	0.1473	0.1383	0.1144	0.1341
237	0.1126	0.118	0.0924	0.1051
238	0.1239	0.1296	0.0912	0.0996
239	0.0927	0.0975	0.0767	0.0716
240	0.1036	0.118	0.0876	0.0829
241	0.1051	0.132	0.0937	0.097
242	0.1067	0.1401	0.0976	0.0967
243	0.1498	0.1727	0.1259	0.1284
244	0.1742	0.1882	0.1341	0.1403
245	0.1799	0.1905	0.1365	0.1419
246	0.143	0.1553	0.1155	0.1133
247	0.1451	0.1579	0.1143	0.1118
248	0.1635	0.1784	0.1243	0.1244
249	0.1492	0.1573	0.1059	0.1112
250	0.1186	0.1316	0.0857	0.086
251	0.1484	0.1639	0.1088	0.1079
252	0.16	0.1672	0.1124	0.11
253	0.1283	0.1371	0.0897	0.0871
254	0.13	0.1503	0.0956	0.0961
255	0.1668	0.1838	0.1236	0.1239
256	0.1658	0.1762	0.1203	0.1205
257	0.147	0.164	0.1084	0.1066
258	0.1596	0.1847	0.1212	0.1207
259	0.1323	0.1565	0.0989	0.1016
260	0.1309	0.1567	0.099	0.1041
261	0.1098	0.1318	0.0837	0.0899
262	0.1112	0.1366	0.0878	0.0963
263	0.1118	0.1343	0.0845	0.0919
264	0.0828	0.1048	0.0662	0.0684
265	0.0733	0.0978	0.0638	0.0715
266	0.0927	0.1144	0.0755	0.0874
267	0.0892	0.104	0.0716	0.0775
268	0.0657	0.074	0.058	0.0628
269	0.0808	0.0932	0.0735	0.0871
270	0.1037	0.1144	0.0938	0.1066
271	0.0974	0.108	0.0948	0.101
272	0.0945	0.1029	0.0949	0.1028
273	0.1218	0.1253	0.132	0.1395
274	0.1402	0.1516	0.1581	0.1623
275	0.1383	0.1519	0.1413	0.1551
276	0.1505	0.1567	0.1445	0.1582
277	0.2068	0.2157	0.1977	0.2263
278	0.2434	0.2566	0.2201	0.2501
279	0.1807	0.1949	0.1477	0.1834
280	0.1563	0.1654	0.1233	0.1478
281	0.1248	0.1321	0.0961	0.1163
282	0.1354	0.143	0.1052	0.13
283	0.1722	0.1887	0.1409	0.1695
284	0.1562	0.1678	0.1273	0.1484
285	0.1558	0.1673	0.1317	0.1457
286	0.133	0.1359	0.1077	0.1208
287	0.0997	0.1055	0.0801	0.0884
288	0.0959	0.1001	0.0747	0.0771
289	0.0847	0.0884	0.0659	0.0619
290	0.1117	0.1017	0.0887	0.0776
291	0.1036	0.0984	0.0639	0.0819
292	0.1002	0.0984	0.0625	0.0696
293	0.0947	0.0949	0.0714	0.071
294	0.1234	0.1186	0.0843	0.0963
295	0.1298	0.1216	0.0741	0.0974
296	0.1172	0.0986	0.0663	0.0891
297	0.1352	0.1436	0.1229	0.1071
298	0.1623	0.1726	0.1261	0.1287
299	0.1743	0.1676	0.1377	0.1396
300	0.1801	0.1772	0.1709	0.1473
301	0.2046	0.222	0.2267	0.1692
302	0.2317	0.2822	0.2431	0.1952
303	0.266	0.3741	0.2664	0.195
304	0.2758	0.5095	0.2467	0.263
305	0.322	0.6473	0.2103	0.2885

## Sheet: RMSD
Time (ns)	Alpha-Mangostin	Atazanavir	Birinapant	Lopinavir
0	0.0005036	0.0005003	0.0005008	0.0005009
0.01	0.0758445	0.0887509	0.0806861	0.0941116
0.02	0.0950167	0.09659	0.0856065	0.113443
0.03	0.0942494	0.109378	0.101632	0.116913
0.04	0.0943536	0.111457	0.10197	0.106792
0.05	0.102327	0.120903	0.117667	0.121133
0.06	0.106063	0.159506	0.125724	0.11031
0.07	0.0988916	0.157972	0.135097	0.118009
0.08	0.102647	0.182239	0.130231	0.127035
0.09	0.103008	0.171722	0.127642	0.131399
0.1	0.117323	0.178178	0.122989	0.127437
0.11	0.11748	0.151193	0.120009	0.126794
0.12	0.107327	0.145676	0.125768	0.123941
0.13	0.103315	0.155635	0.12709	0.124895
0.14	0.106538	0.166437	0.124743	0.128935
0.15	0.106747	0.162134	0.119173	0.118256
0.16	0.104697	0.158645	0.127515	0.112965
0.17	0.107794	0.146298	0.139052	0.117987
0.18	0.114612	0.142659	0.118107	0.118334
0.19	0.105202	0.13357	0.130819	0.118892
0.2	0.117973	0.137664	0.134475	0.114806
0.21	0.127684	0.137724	0.124159	0.119493
0.22	0.12584	0.138714	0.127713	0.119876
0.23	0.136838	0.160435	0.14053	0.127288
0.24	0.151291	0.151901	0.131153	0.122584
0.25	0.137476	0.150011	0.123377	0.124466
0.26	0.13302	0.141364	0.122771	0.113651
0.27	0.14046	0.157321	0.131779	0.128646
0.28	0.128661	0.154097	0.140818	0.117767
0.29	0.128563	0.154171	0.144473	0.140057
0.3	0.126004	0.141753	0.128583	0.141834
0.31	0.133935	0.162363	0.135147	0.125972
0.32	0.137395	0.181393	0.126655	0.132442
0.33	0.134253	0.175396	0.1248	0.134575
0.34	0.128689	0.161356	0.126158	0.128304
0.35	0.147747	0.164236	0.119914	0.147319
0.36	0.160421	0.163846	0.123977	0.137978
0.37	0.151529	0.147884	0.139502	0.128536
0.38	0.12659	0.150129	0.121289	0.120496
0.39	0.121045	0.157825	0.120415	0.12784
0.4	0.126909	0.143956	0.127802	0.136691
0.41	0.118085	0.156488	0.121041	0.124208
0.42	0.115402	0.137598	0.116794	0.114298
0.43	0.140471	0.132763	0.133513	0.108443
0.44	0.137471	0.133549	0.119267	0.114391
0.45	0.145866	0.140864	0.124053	0.1186
0.46	0.134037	0.147443	0.11081	0.116555
0.47	0.155077	0.158224	0.131464	0.12266
0.48	0.149763	0.139475	0.123015	0.11788
0.49	0.157482	0.152734	0.126642	0.122556
0.5	0.162805	0.163818	0.129438	0.112809
0.51	0.144736	0.156255	0.139528	0.116344
0.52	0.147763	0.155637	0.153858	0.120531
0.53	0.15357	0.156169	0.145831	0.116922
0.54	0.141886	0.163431	0.158655	0.111751
0.55	0.132078	0.180128	0.14654	0.116073
0.56	0.130177	0.183008	0.136345	0.122789
0.57	0.126599	0.172851	0.140177	0.120364
0.58	0.154953	0.183471	0.144658	0.122325
0.59	0.146577	0.188304	0.132534	0.11022
0.6	0.135899	0.176816	0.128739	0.126795
0.61	0.13417	0.18474	0.13688	0.120999
0.62	0.12758	0.191309	0.154573	0.127143
0.63	0.132168	0.174617	0.128482	0.116877
0.64	0.126797	0.184203	0.123435	0.135387
0.65	0.123386	0.17667	0.125073	0.134761
0.66	0.11636	0.159218	0.127459	0.120849
0.67	0.125001	0.159167	0.146301	0.118919
0.68	0.129264	0.171109	0.14504	0.11193
0.69	0.12775	0.171126	0.146446	0.11546
0.7	0.120639	0.171272	0.144707	0.118396
0.71	0.118861	0.181488	0.135088	0.114656
0.72	0.13011	0.161303	0.136268	0.119771
0.73	0.142925	0.178582	0.134464	0.121681
0.74	0.140997	0.15799	0.122653	0.12452
0.75	0.124328	0.16729	0.12686	0.118555
0.76	0.126058	0.160297	0.115732	0.114136
0.77	0.142589	0.183992	0.111389	0.113048
0.78	0.154932	0.189995	0.119418	0.112086
0.79	0.158723	0.174464	0.125704	0.114915
0.8	0.159101	0.175658	0.139049	0.118605
0.81	0.150864	0.167205	0.13427	0.114763
0.82	0.138355	0.163846	0.145608	0.110478
0.83	0.125288	0.157873	0.135319	0.115947
0.84	0.124745	0.169366	0.138132	0.120006
0.85	0.121518	0.140877	0.129783	0.11875
0.86	0.134456	0.151686	0.140979	0.132293
0.87	0.124509	0.171614	0.134778	0.135441
0.88	0.147229	0.159864	0.133602	0.115569
0.89	0.136565	0.164219	0.142814	0.118764
0.9	0.138944	0.152304	0.131046	0.127234
0.91	0.129488	0.148505	0.121746	0.12489
0.92	0.127507	0.162933	0.139355	0.137209
0.93	0.134968	0.181281	0.139517	0.132765
0.94	0.149359	0.18042	0.142314	0.122692
0.95	0.138247	0.171995	0.140648	0.130532
0.96	0.139055	0.159711	0.144358	0.124616
0.97	0.141236	0.155875	0.136255	0.138096
0.98	0.154612	0.14755	0.129	0.144191
0.99	0.162248	0.147559	0.12196	0.126143
1	0.135968	0.130126	0.126734	0.126552
1.01	0.140309	0.133241	0.128407	0.137811
1.02	0.130057	0.147137	0.128416	0.12961
1.03	0.135603	0.168206	0.122224	0.137268
1.04	0.145993	0.157804	0.132985	0.139651
1.05	0.139886	0.176522	0.142314	0.127128
1.06	0.141041	0.148933	0.137375	0.122823
1.07	0.138579	0.151035	0.136749	0.128263
1.08	0.136254	0.142404	0.124466	0.123951
1.09	0.133365	0.137954	0.136538	0.134907
1.1	0.142615	0.124019	0.129163	0.120765
1.11	0.160601	0.143299	0.140302	0.112003
1.12	0.146343	0.14701	0.131946	0.122629
1.13	0.157103	0.133627	0.144673	0.123649
1.14	0.152563	0.151776	0.139712	0.12127
1.15	0.155004	0.15114	0.126258	0.120928
1.16	0.162993	0.142175	0.122245	0.109593
1.17	0.156343	0.150151	0.118769	0.107579
1.18	0.167037	0.142772	0.122353	0.12051
1.19	0.164443	0.147871	0.134874	0.118069
1.2	0.169551	0.15573	0.136021	0.124629
1.21	0.147998	0.155991	0.137309	0.132792
1.22	0.151445	0.176647	0.152788	0.131799
1.23	0.162566	0.193894	0.139043	0.133499
1.24	0.149924	0.180449	0.133147	0.134093
1.25	0.157095	0.174916	0.156856	0.128862
1.26	0.146532	0.183083	0.150433	0.11947
1.27	0.136083	0.18853	0.15495	0.119546
1.28	0.144603	0.170068	0.145943	0.121075
1.29	0.140153	0.17346	0.151724	0.115711
1.3	0.151205	0.18132	0.136964	0.114076
1.31	0.150817	0.199039	0.147868	0.113684
1.32	0.134339	0.201105	0.134369	0.113463
1.33	0.170053	0.178285	0.119389	0.119492
1.34	0.170495	0.185849	0.13379	0.122695
1.35	0.165973	0.187422	0.131844	0.111179
1.36	0.165965	0.16601	0.13935	0.112552
1.37	0.163458	0.183557	0.131085	0.126753
1.38	0.16071	0.190389	0.130396	0.122862
1.39	0.153944	0.166021	0.142477	0.123435
1.4	0.154092	0.142349	0.142312	0.123473
1.41	0.166776	0.160423	0.144022	0.12242
1.42	0.136415	0.164327	0.160125	0.115068
1.43	0.13223	0.174025	0.152917	0.134771
1.44	0.122107	0.188673	0.162698	0.126939
1.45	0.124951	0.171627	0.139917	0.131139
1.46	0.12303	0.166418	0.1431	0.133068
1.47	0.129015	0.153748	0.149261	0.146857
1.48	0.1295	0.150815	0.1604	0.133875
1.49	0.14375	0.162026	0.144554	0.128673
1.5	0.13311	0.162888	0.134687	0.139322
1.51	0.127592	0.163811	0.144196	0.121918
1.52	0.126138	0.159597	0.138821	0.130193
1.53	0.137125	0.154049	0.157739	0.12554
1.54	0.134774	0.151145	0.146513	0.123674
1.55	0.14756	0.147702	0.133197	0.127681
1.56	0.151631	0.13659	0.129742	0.119508
1.57	0.15332	0.137783	0.133378	0.121935
1.58	0.140616	0.134624	0.1388	0.134788
1.59	0.123329	0.142326	0.152941	0.137503
1.6	0.136261	0.148872	0.145737	0.123781
1.61	0.134083	0.153295	0.131608	0.124124
1.62	0.124103	0.145672	0.141977	0.129421
1.63	0.126309	0.145072	0.144749	0.140668
1.64	0.121116	0.133231	0.132309	0.121915
1.65	0.125013	0.153394	0.141347	0.137986
1.66	0.133518	0.137365	0.151292	0.147677
1.67	0.150027	0.142386	0.143509	0.135626
1.68	0.139827	0.14888	0.149169	0.137299
1.69	0.129263	0.130213	0.133799	0.131659
1.7	0.149921	0.127323	0.153416	0.136331
1.71	0.149021	0.134992	0.1506	0.12856
1.72	0.132411	0.131292	0.147327	0.129048
1.73	0.132878	0.140242	0.139938	0.134421
1.74	0.131127	0.152665	0.146323	0.145486
1.75	0.148033	0.158567	0.133933	0.151844
1.76	0.163126	0.156838	0.136851	0.132394
1.77	0.146069	0.164897	0.142558	0.132073
1.78	0.135124	0.149564	0.151962	0.138358
1.79	0.143705	0.136601	0.136525	0.134957
1.8	0.130362	0.143938	0.134984	0.118632
1.81	0.155087	0.160962	0.145614	0.128191
1.82	0.15406	0.147311	0.144954	0.144175
1.83	0.176747	0.140844	0.145811	0.128041
1.84	0.16391	0.137916	0.136916	0.118492
1.85	0.149599	0.149272	0.128893	0.127843
1.86	0.142021	0.15976	0.126076	0.132632
1.87	0.153002	0.169757	0.134589	0.13683
1.88	0.160865	0.175687	0.127509	0.137745
1.89	0.140969	0.167862	0.140944	0.11693
1.9	0.131132	0.154417	0.146217	0.116724
1.91	0.138461	0.166472	0.136018	0.12208
1.92	0.159301	0.167197	0.138299	0.12918
1.93	0.150394	0.188008	0.134817	0.134457
1.94	0.142001	0.16919	0.149112	0.118609
1.95	0.151132	0.177953	0.151026	0.126746
1.96	0.157361	0.154775	0.16884	0.126665
1.97	0.175063	0.147389	0.167705	0.13243
1.98	0.174897	0.150832	0.181486	0.130508
1.99	0.14688	0.153439	0.1807	0.12317
2	0.150358	0.142588	0.173901	0.14567
2.01	0.17258	0.157852	0.161739	0.15692
2.02	0.17181	0.174894	0.160226	0.169516
2.03	0.167492	0.175926	0.157665	0.170374
2.04	0.156646	0.154653	0.164659	0.171949
2.05	0.15545	0.1505	0.183786	0.175162
2.06	0.158314	0.154554	0.154592	0.168508
2.07	0.145796	0.145776	0.160659	0.169884
2.08	0.149298	0.16551	0.166438	0.185778
2.09	0.144124	0.175748	0.162269	0.180603
2.1	0.157033	0.19429	0.151235	0.175361
2.11	0.152727	0.182888	0.155016	0.153606
2.12	0.154083	0.186339	0.154578	0.15328
2.13	0.168567	0.162821	0.157264	0.13827
2.14	0.171325	0.164612	0.163074	0.123746
2.15	0.146019	0.164727	0.16329	0.12696
2.16	0.13133	0.169647	0.156835	0.119
2.17	0.132416	0.176818	0.157387	0.120013
2.18	0.134129	0.179432	0.181596	0.127638
2.19	0.13955	0.174007	0.184026	0.124641
2.2	0.122633	0.159035	0.192166	0.111275
2.21	0.130677	0.164651	0.182418	0.125388
2.22	0.145613	0.168263	0.183301	0.121601
2.23	0.147791	0.162687	0.183178	0.115368
2.24	0.156128	0.148943	0.185182	0.123727
2.25	0.150269	0.142971	0.191903	0.118614
2.26	0.140984	0.157131	0.196233	0.119208
2.27	0.153929	0.138309	0.18422	0.119416
2.28	0.142315	0.150739	0.167482	0.121875
2.29	0.138932	0.147845	0.16087	0.127358
2.3	0.144845	0.132853	0.144726	0.125553
2.31	0.126434	0.152682	0.140235	0.118075
2.32	0.126618	0.162304	0.147255	0.130625
2.33	0.133148	0.156605	0.163336	0.117906
2.34	0.138107	0.158282	0.148142	0.121118
2.35	0.13691	0.16825	0.145013	0.125054
2.36	0.161787	0.161962	0.14834	0.113581
2.37	0.160244	0.169269	0.156198	0.11826
2.38	0.150728	0.164704	0.162261	0.113109
2.39	0.161961	0.15699	0.164751	0.114117
2.4	0.151449	0.151866	0.168495	0.112601
2.41	0.146589	0.166154	0.16932	0.112825
2.42	0.143883	0.167819	0.163777	0.120208
2.43	0.146003	0.172475	0.174231	0.124853
2.44	0.170814	0.166	0.186245	0.127153
2.45	0.161839	0.171818	0.192088	0.119365
2.46	0.140713	0.168371	0.180417	0.120261
2.47	0.134385	0.167614	0.180451	0.11857
2.48	0.12675	0.162998	0.188024	0.117475
2.49	0.132327	0.180496	0.184859	0.12992
2.5	0.133756	0.187636	0.170143	0.130541
2.51	0.13625	0.223346	0.14271	0.124582
2.52	0.146999	0.220891	0.150555	0.121034
2.53	0.151653	0.217214	0.156825	0.119133
2.54	0.140238	0.228019	0.170841	0.118743
2.55	0.129098	0.202647	0.166287	0.119734
2.56	0.133336	0.179331	0.180384	0.128704
2.57	0.139134	0.17804	0.183298	0.139607
2.58	0.142721	0.171657	0.165607	0.126603
2.59	0.141983	0.189182	0.174241	0.1314
2.6	0.14243	0.19776	0.186474	0.153569
2.61	0.136723	0.19603	0.180879	0.143143
2.62	0.128298	0.199668	0.181435	0.143211
2.63	0.136985	0.187396	0.188697	0.135499
2.64	0.133025	0.181222	0.204037	0.132051
2.65	0.12772	0.191477	0.196585	0.131233
2.66	0.133676	0.182593	0.191047	0.128196
2.67	0.127739	0.188976	0.18534	0.132278
2.68	0.135995	0.176929	0.186602	0.126579
2.69	0.130586	0.179912	0.17617	0.123739
2.7	0.132553	0.188768	0.197788	0.120352
2.71	0.139958	0.19886	0.177732	0.123546
2.72	0.135356	0.196648	0.200755	0.135391
2.73	0.136503	0.187834	0.195657	0.147161
2.74	0.155413	0.162785	0.192207	0.140357
2.75	0.141963	0.161268	0.196357	0.136347
2.76	0.155164	0.16438	0.194874	0.141364
2.77	0.151765	0.176264	0.198437	0.127918
2.78	0.154216	0.174235	0.199322	0.125591
2.79	0.127001	0.162611	0.204067	0.120818
2.8	0.147342	0.184529	0.213813	0.120301
2.81	0.149849	0.171458	0.210711	0.123484
2.82	0.158125	0.180595	0.196459	0.133433
2.83	0.15649	0.191297	0.204158	0.125026
2.84	0.168666	0.198857	0.199799	0.132462
2.85	0.169675	0.184482	0.206253	0.125869
2.86	0.155218	0.182902	0.200256	0.123819
2.87	0.157818	0.203448	0.211857	0.115236
2.88	0.157316	0.190263	0.203331	0.120057
2.89	0.144296	0.170783	0.193792	0.135369
2.9	0.158735	0.186284	0.184427	0.136816
2.91	0.150288	0.185998	0.199645	0.130799
2.92	0.152882	0.181605	0.213224	0.123177
2.93	0.138715	0.159003	0.194747	0.133892
2.94	0.140152	0.173679	0.169674	0.12303
2.95	0.130109	0.179203	0.1841	0.123013
2.96	0.129486	0.165511	0.165764	0.1138
2.97	0.150004	0.170049	0.16631	0.111891
2.98	0.139844	0.163931	0.171458	0.125808
2.99	0.14517	0.176841	0.167406	0.118588
3	0.136874	0.16799	0.179247	0.121019
3.01	0.134566	0.176009	0.177837	0.119296
3.02	0.126879	0.176061	0.162116	0.115618
3.03	0.139013	0.180493	0.166304	0.127889
3.04	0.123161	0.189109	0.160731	0.12224
3.05	0.125189	0.185766	0.162877	0.124073
3.06	0.138052	0.182315	0.140839	0.121329
3.07	0.137648	0.180918	0.160372	0.112196
3.08	0.143453	0.164791	0.162794	0.117154
3.09	0.134759	0.157971	0.151189	0.108451
3.1	0.123854	0.161627	0.143061	0.104979
3.11	0.116783	0.158974	0.153907	0.115484
3.12	0.12542	0.182437	0.159112	0.117724
3.13	0.135944	0.164277	0.142525	0.106327
3.14	0.120876	0.167333	0.146366	0.11904
3.15	0.123721	0.167978	0.136113	0.108726
3.16	0.144013	0.156979	0.156693	0.12057
3.17	0.131546	0.159804	0.146594	0.111014
3.18	0.124439	0.165653	0.149616	0.108563
3.19	0.134506	0.169449	0.158886	0.115392
3.2	0.150451	0.169329	0.161962	0.127042
3.21	0.136031	0.144638	0.165908	0.121071
3.22	0.124083	0.149395	0.164705	0.11998
3.23	0.14472	0.149773	0.155593	0.116218
3.24	0.139946	0.157791	0.153508	0.106604
3.25	0.146062	0.149847	0.163426	0.110067
3.26	0.149366	0.16171	0.176728	0.103351
3.27	0.14549	0.171942	0.187626	0.112842
3.28	0.16235	0.167283	0.175449	0.105308
3.29	0.137116	0.156371	0.186609	0.109307
3.3	0.144604	0.165222	0.162537	0.124508
3.31	0.143953	0.168316	0.162418	0.116779
3.32	0.146588	0.170369	0.157015	0.115093
3.33	0.152738	0.16779	0.171667	0.118173
3.34	0.162328	0.149151	0.189991	0.109282
3.35	0.172865	0.159748	0.193989	0.106135
3.36	0.167204	0.164358	0.177849	0.11486
3.37	0.146128	0.161811	0.193404	0.123586
3.38	0.156619	0.160529	0.20369	0.123135
3.39	0.146799	0.160765	0.196673	0.114095
3.4	0.168293	0.160623	0.193284	0.124898
3.41	0.163482	0.172991	0.202682	0.11042
3.42	0.16757	0.172536	0.206904	0.121944
3.43	0.161466	0.15571	0.190604	0.123122
3.44	0.160609	0.157388	0.192635	0.125133
3.45	0.159113	0.148417	0.185578	0.122797
3.46	0.142001	0.169418	0.196008	0.122408
3.47	0.146463	0.159339	0.191314	0.125178
3.48	0.128272	0.154791	0.201384	0.120306
3.49	0.127753	0.149163	0.193125	0.130076
3.5	0.129491	0.154853	0.189682	0.128561
3.51	0.127748	0.155022	0.190409	0.135546
3.52	0.120761	0.151649	0.183818	0.139106
3.53	0.124498	0.145122	0.165459	0.132746
3.54	0.115928	0.145549	0.163051	0.131226
3.55	0.118114	0.14023	0.18381	0.132925
3.56	0.134745	0.14622	0.188319	0.138474
3.57	0.152984	0.152225	0.163656	0.13907
3.58	0.141427	0.166591	0.159207	0.152812
3.59	0.150154	0.158487	0.159076	0.141316
3.6	0.125084	0.15454	0.173228	0.154068
3.61	0.127807	0.160908	0.17806	0.143071
3.62	0.122133	0.156461	0.186571	0.147719
3.63	0.12408	0.166835	0.195633	0.144369
3.64	0.126302	0.158198	0.204225	0.139656
3.65	0.130402	0.18055	0.213702	0.131516
3.66	0.135	0.177958	0.230278	0.154383
3.67	0.134635	0.175478	0.229876	0.136405
3.68	0.129508	0.178177	0.233982	0.143459
3.69	0.128732	0.17524	0.227493	0.126258
3.7	0.131885	0.158944	0.226272	0.134249
3.71	0.145031	0.153384	0.239915	0.136732
3.72	0.126267	0.174314	0.246609	0.136472
3.73	0.124041	0.195119	0.267325	0.145733
3.74	0.130273	0.198782	0.260244	0.1441
3.75	0.135038	0.174648	0.228864	0.151838
3.76	0.133023	0.181093	0.217879	0.127189
3.77	0.138599	0.167681	0.221262	0.127535
3.78	0.127073	0.171161	0.203431	0.129607
3.79	0.125117	0.170597	0.238704	0.133315
3.8	0.138757	0.166978	0.243094	0.144424
3.81	0.139716	0.176311	0.24025	0.140959
3.82	0.12703	0.173688	0.229062	0.130368
3.83	0.142046	0.164539	0.228184	0.12798
3.84	0.133882	0.165939	0.236549	0.133401
3.85	0.142835	0.166086	0.248109	0.127678
3.86	0.148463	0.15999	0.227037	0.133189
3.87	0.149337	0.174286	0.217394	0.134243
3.88	0.124955	0.178455	0.211594	0.122874
3.89	0.14547	0.180956	0.19951	0.116632
3.9	0.159786	0.169185	0.198501	0.123361
3.91	0.156098	0.154883	0.204109	0.125671
3.92	0.154396	0.187519	0.211248	0.129881
3.93	0.17054	0.177114	0.20237	0.133935
3.94	0.169878	0.173365	0.170005	0.129704
3.95	0.168175	0.149756	0.175153	0.132515
3.96	0.156088	0.171037	0.180699	0.135977
3.97	0.147764	0.171427	0.168536	0.125069
3.98	0.164783	0.184568	0.181951	0.129503
3.99	0.144018	0.185359	0.170427	0.134992
4	0.127314	0.234273	0.15426	0.118372
4.01	0.153675	0.211686	0.160649	0.130981
4.02	0.122483	0.223332	0.174017	0.12778
4.03	0.122814	0.166823	0.174764	0.135206
4.04	0.125029	0.163047	0.164914	0.12929
4.05	0.130741	0.154873	0.190374	0.125988
4.06	0.133245	0.158939	0.199832	0.139448
4.07	0.131318	0.160254	0.178815	0.123686
4.08	0.126832	0.152151	0.184701	0.134526
4.09	0.161185	0.172742	0.164096	0.129018
4.1	0.120783	0.161368	0.172523	0.116616
4.11	0.133416	0.164933	0.165504	0.125622
4.12	0.125158	0.147884	0.161202	0.136678
4.13	0.135135	0.152574	0.166138	0.12995
4.14	0.159063	0.168917	0.168105	0.126212
4.15	0.154472	0.16556	0.188916	0.150515
4.16	0.143795	0.162678	0.178943	0.132496
4.17	0.153618	0.162086	0.174712	0.133384
4.18	0.138517	0.167786	0.174408	0.138906
4.19	0.162986	0.175394	0.183137	0.133919
4.2	0.156104	0.152712	0.191671	0.139203
4.21	0.161836	0.155317	0.174863	0.129831
4.22	0.166536	0.155973	0.182618	0.138758
4.23	0.17366	0.147804	0.189614	0.130561
4.24	0.188012	0.141287	0.165226	0.134986
4.25	0.185309	0.132703	0.181336	0.129429
4.26	0.179061	0.138417	0.170452	0.122975
4.27	0.156807	0.138018	0.161759	0.130373
4.28	0.169324	0.158645	0.158196	0.124139
4.29	0.165742	0.154324	0.196504	0.127845
4.3	0.161489	0.13633	0.214098	0.136341
4.31	0.17314	0.156976	0.195231	0.133172
4.32	0.177891	0.149746	0.199514	0.118759
4.33	0.152897	0.133625	0.185616	0.121222
4.34	0.148144	0.129768	0.1746	0.116709
4.35	0.14068	0.140956	0.158326	0.117958
4.36	0.129807	0.138817	0.150879	0.119781
4.37	0.115607	0.141799	0.173337	0.123292
4.38	0.11825	0.144508	0.174461	0.121993
4.39	0.119538	0.15203	0.166691	0.114661
4.4	0.118632	0.154102	0.17152	0.129099
4.41	0.115966	0.158873	0.196868	0.114341
4.42	0.112493	0.179735	0.183671	0.113395
4.43	0.121241	0.169957	0.19523	0.120311
4.44	0.115469	0.173584	0.165639	0.116512
4.45	0.123636	0.18081	0.183831	0.112476
4.46	0.116925	0.175902	0.159382	0.10523
4.47	0.116733	0.198075	0.16403	0.112857
4.48	0.112968	0.182733	0.165013	0.110772
4.49	0.120099	0.178782	0.158101	0.105498
4.5	0.119837	0.168425	0.155408	0.121158
4.51	0.110867	0.17751	0.153724	0.119466
4.52	0.1042	0.168136	0.162462	0.124045
4.53	0.120087	0.167952	0.151722	0.130869
4.54	0.118974	0.19661	0.175534	0.128843
4.55	0.123328	0.191748	0.184065	0.137666
4.56	0.128495	0.200462	0.183674	0.118738
4.57	0.158035	0.193179	0.165366	0.14597
4.58	0.14331	0.202124	0.147213	0.13829
4.59	0.146159	0.180302	0.161845	0.138733
4.6	0.130551	0.170299	0.172987	0.125789
4.61	0.145619	0.182752	0.162806	0.139608
4.62	0.142133	0.179738	0.165526	0.129846
4.63	0.144592	0.177465	0.16168	0.133844
4.64	0.133719	0.177689	0.142252	0.140456
4.65	0.119556	0.171412	0.149146	0.129583
4.66	0.119626	0.183009	0.160686	0.136285
4.67	0.126726	0.214097	0.167633	0.146064
4.68	0.117396	0.198785	0.185573	0.119316
4.69	0.129017	0.176541	0.192253	0.128939
4.7	0.123617	0.163799	0.177376	0.137655
4.71	0.126936	0.180809	0.167471	0.131504
4.72	0.14651	0.177259	0.176615	0.139662
4.73	0.13004	0.174727	0.17906	0.128851
4.74	0.137439	0.168469	0.17571	0.132081
4.75	0.150988	0.165106	0.161433	0.129933
4.76	0.131392	0.177216	0.179929	0.123049
4.77	0.137748	0.1848	0.177366	0.126931
4.78	0.153323	0.190423	0.160342	0.118839
4.79	0.14773	0.170067	0.152688	0.125782
4.8	0.157014	0.169109	0.148596	0.127219
4.81	0.145827	0.157597	0.174595	0.146846
4.82	0.155042	0.162136	0.181134	0.126728
4.83	0.144579	0.164141	0.165847	0.126908
4.84	0.162745	0.166388	0.17463	0.126961
4.85	0.149408	0.163797	0.165449	0.122308
4.86	0.133906	0.169467	0.166794	0.131622
4.87	0.139039	0.162791	0.172895	0.139086
4.88	0.137859	0.164394	0.171162	0.130831
4.89	0.124748	0.177842	0.176316	0.128623
4.9	0.128961	0.177688	0.167697	0.123745
4.91	0.139256	0.149113	0.186105	0.123066
4.92	0.15731	0.157637	0.188166	0.136138
4.93	0.146315	0.150596	0.178181	0.129748
4.94	0.164859	0.151348	0.166041	0.140611
4.95	0.145857	0.154386	0.166794	0.145915
4.96	0.142946	0.173935	0.177247	0.135572
4.97	0.154221	0.1562	0.17394	0.129204
4.98	0.171101	0.154877	0.176092	0.127439
4.99	0.154079	0.143811	0.178966	0.126671
5	0.157194	0.150462	0.176087	0.114615
5.01	0.165609	0.163638	0.179701	0.120134
5.02	0.150811	0.177085	0.184506	0.123498
5.03	0.184154	0.151042	0.180498	0.115627
5.04	0.177863	0.145944	0.182648	0.116516
5.05	0.170928	0.160301	0.185766	0.115824
5.06	0.177355	0.161409	0.197199	0.124441
5.07	0.17245	0.164822	0.197242	0.118604
5.08	0.166726	0.164215	0.207819	0.127663
5.09	0.194069	0.159578	0.181093	0.130517
5.1	0.174255	0.151753	0.179425	0.133886
5.11	0.174747	0.17261	0.180447	0.131486
5.12	0.151952	0.17772	0.175941	0.130883
5.13	0.164768	0.174896	0.184306	0.122063
5.14	0.15893	0.198479	0.195051	0.111866
5.15	0.145842	0.207614	0.202089	0.113149
5.16	0.142131	0.202558	0.198212	0.115453
5.17	0.147111	0.207823	0.19605	0.121561
5.18	0.13771	0.203601	0.193683	0.122612
5.19	0.140241	0.168059	0.189118	0.124089
5.2	0.133813	0.176751	0.201391	0.120124
5.21	0.120683	0.167448	0.186147	0.107116
5.22	0.139289	0.161387	0.180235	0.127621
5.23	0.143564	0.173502	0.17801	0.131103
5.24	0.148863	0.172092	0.175299	0.137447
5.25	0.156569	0.155853	0.17275	0.121719
5.26	0.145434	0.164833	0.186497	0.118932
5.27	0.151007	0.141124	0.19515	0.11957
5.28	0.150739	0.153202	0.205966	0.118217
5.29	0.144203	0.145734	0.198024	0.123378
5.3	0.163274	0.153484	0.178289	0.125895
5.31	0.184267	0.180517	0.189521	0.133912
5.32	0.170245	0.170953	0.1918	0.114665
5.33	0.175352	0.17956	0.19236	0.12202
5.34	0.18618	0.169262	0.204246	0.135027
5.35	0.178761	0.169651	0.193139	0.122587
5.36	0.191972	0.167673	0.212404	0.122966
5.37	0.168303	0.188139	0.185389	0.125387
5.38	0.16521	0.186937	0.175891	0.125704
5.39	0.15673	0.191509	0.184876	0.150636
5.4	0.144511	0.186861	0.180824	0.156374
5.41	0.141389	0.191628	0.166707	0.126894
5.42	0.122735	0.213965	0.166619	0.1142
5.43	0.12836	0.216963	0.17334	0.117515
5.44	0.155321	0.177742	0.16208	0.118043
5.45	0.161755	0.177981	0.187439	0.133729
5.46	0.166636	0.175475	0.173188	0.124115
5.47	0.159756	0.185654	0.189804	0.129325
5.48	0.151329	0.180178	0.213454	0.122256
5.49	0.165452	0.150826	0.211581	0.114426
5.5	0.14387	0.155421	0.229243	0.131746
5.51	0.150775	0.150517	0.202775	0.116715
5.52	0.14056	0.165299	0.220127	0.120702
5.53	0.164298	0.169067	0.201251	0.121689
5.54	0.155206	0.163236	0.199569	0.1191
5.55	0.154835	0.155203	0.180996	0.121865
5.56	0.16559	0.15995	0.190898	0.116097
5.57	0.149233	0.169784	0.179313	0.115077
5.58	0.150896	0.168489	0.191306	0.126696
5.59	0.139186	0.17407	0.18011	0.115552
5.6	0.123873	0.170913	0.186235	0.130503
5.61	0.14927	0.160279	0.187066	0.119918
5.62	0.14706	0.163205	0.19391	0.123075
5.63	0.13409	0.180044	0.202527	0.125757
5.64	0.137914	0.17488	0.199951	0.116413
5.65	0.14603	0.19131	0.218583	0.117559
5.66	0.140637	0.195272	0.236446	0.121487
5.67	0.147007	0.178943	0.229505	0.118277
5.68	0.155587	0.174064	0.226351	0.113276
5.69	0.152908	0.167413	0.221058	0.114639
5.7	0.158296	0.182069	0.220414	0.111942
5.71	0.153513	0.19159	0.230163	0.114478
5.72	0.15063	0.177138	0.205914	0.11287
5.73	0.173956	0.18991	0.212721	0.115184
5.74	0.164292	0.20403	0.204128	0.115883
5.75	0.149294	0.196537	0.188982	0.110729
5.76	0.155159	0.210688	0.200398	0.115413
5.77	0.165399	0.21359	0.208376	0.113477
5.78	0.1771	0.197238	0.219608	0.121874
5.79	0.168593	0.177889	0.226327	0.116924
5.8	0.181577	0.203017	0.226489	0.112802
5.81	0.188304	0.192234	0.216749	0.119979
5.82	0.169641	0.179787	0.228049	0.110657
5.83	0.177231	0.167481	0.207548	0.120279
5.84	0.196649	0.14566	0.190265	0.127921
5.85	0.204762	0.172538	0.207181	0.120067
5.86	0.177446	0.185184	0.20337	0.11475
5.87	0.179037	0.178821	0.193777	0.119894
5.88	0.189758	0.182893	0.199731	0.113542
5.89	0.171004	0.17337	0.197127	0.120571
5.9	0.170488	0.178103	0.203614	0.117968
5.91	0.167908	0.182273	0.205516	0.115859
5.92	0.160665	0.209421	0.206907	0.116657
5.93	0.165036	0.206766	0.224059	0.118925
5.94	0.179743	0.216623	0.234908	0.116486
5.95	0.157055	0.221131	0.245727	0.116824
5.96	0.16507	0.180735	0.222392	0.113536
5.97	0.170396	0.164309	0.210915	0.110804
5.98	0.180847	0.184277	0.213386	0.117025
5.99	0.156246	0.196107	0.216165	0.116471
6	0.155284	0.201781	0.227929	0.126293
6.01	0.146017	0.176555	0.2154	0.111418
6.02	0.144429	0.189384	0.19981	0.110298
6.03	0.157956	0.196795	0.213573	0.112993
6.04	0.165109	0.193202	0.230824	0.1168
6.05	0.151394	0.205921	0.223704	0.121413
6.06	0.160235	0.207019	0.211504	0.117202
6.07	0.129281	0.209808	0.236484	0.114811
6.08	0.139967	0.201715	0.240277	0.114701
6.09	0.137838	0.211812	0.215999	0.115061
6.1	0.130688	0.224642	0.222349	0.119573
6.11	0.145272	0.21743	0.199506	0.130828
6.12	0.137192	0.208418	0.202199	0.119248
6.13	0.15532	0.204338	0.196123	0.125025
6.14	0.16462	0.194109	0.198778	0.117666
6.15	0.159552	0.177207	0.205465	0.123477
6.16	0.193969	0.191177	0.218521	0.129592
6.17	0.163546	0.209676	0.215544	0.120215
6.18	0.176215	0.202681	0.217964	0.131955
6.19	0.169398	0.194188	0.249655	0.122102
6.2	0.189212	0.205834	0.214684	0.11346
6.21	0.162443	0.171437	0.20193	0.114698
6.22	0.161557	0.177241	0.181283	0.123388
6.23	0.152614	0.182477	0.187949	0.114855
6.24	0.164993	0.181544	0.190378	0.113759
6.25	0.163175	0.191136	0.168151	0.112366
6.26	0.153152	0.183216	0.174754	0.108119
6.27	0.147419	0.170483	0.184329	0.121848
6.28	0.141956	0.20206	0.207756	0.123097
6.29	0.129534	0.186022	0.213001	0.124528
6.3	0.125093	0.201241	0.211228	0.118563
6.31	0.127688	0.200338	0.195903	0.119319
6.32	0.128385	0.212758	0.206545	0.118416
6.33	0.137149	0.198299	0.198893	0.117501
6.34	0.142752	0.173114	0.200284	0.118976
6.35	0.148285	0.195219	0.185862	0.113822
6.36	0.142687	0.204707	0.197788	0.11411
6.37	0.138947	0.207706	0.20853	0.116557
6.38	0.145574	0.184062	0.210183	0.125784
6.39	0.130044	0.198127	0.204854	0.119446
6.4	0.129011	0.18479	0.199514	0.121677
6.41	0.13827	0.202845	0.209821	0.123762
6.42	0.133736	0.214026	0.187859	0.124433
6.43	0.142392	0.196311	0.189437	0.123147
6.44	0.15153	0.210594	0.181335	0.12485
6.45	0.150996	0.190638	0.175485	0.126712
6.46	0.12712	0.19665	0.159812	0.116969
6.47	0.148024	0.19232	0.153304	0.119952
6.48	0.144486	0.197416	0.155741	0.119159
6.49	0.1508	0.203443	0.154911	0.120588
6.5	0.160352	0.197576	0.161977	0.127464
6.51	0.166738	0.193979	0.16102	0.132191
6.52	0.153478	0.18955	0.154927	0.126032
6.53	0.136672	0.183694	0.155419	0.135687
6.54	0.153509	0.193136	0.153202	0.138533
6.55	0.159382	0.18374	0.155409	0.11087
6.56	0.161661	0.188083	0.152098	0.116278
6.57	0.152198	0.200413	0.162421	0.136384
6.58	0.173788	0.182444	0.151614	0.127675
6.59	0.152139	0.164643	0.152421	0.128197
6.6	0.143643	0.157081	0.159471	0.125239
6.61	0.163378	0.168703	0.159998	0.122145
6.62	0.174043	0.168677	0.176136	0.11873
6.63	0.184089	0.174848	0.171048	0.116078
6.64	0.175346	0.163119	0.175546	0.122055
6.65	0.189876	0.165109	0.179915	0.130471
6.66	0.178038	0.15216	0.17435	0.140286
6.67	0.183439	0.149428	0.170707	0.124058
6.68	0.211069	0.144991	0.160206	0.124703
6.69	0.205322	0.146417	0.156197	0.116044
6.7	0.196961	0.136814	0.162233	0.12349
6.71	0.199476	0.142879	0.152407	0.125579
6.72	0.207254	0.152676	0.1565	0.135645
6.73	0.204604	0.147145	0.140204	0.133352
6.74	0.194891	0.141978	0.151933	0.134209
6.75	0.191747	0.162053	0.13856	0.143511
6.76	0.180246	0.15495	0.150513	0.137065
6.77	0.177742	0.174957	0.154139	0.133035
6.78	0.17021	0.16632	0.153578	0.123944
6.79	0.150095	0.153787	0.156306	0.116116
6.8	0.157776	0.161864	0.138757	0.129631
6.81	0.154298	0.153233	0.139143	0.118167
6.82	0.150066	0.157147	0.143437	0.122714
6.83	0.176445	0.151402	0.147054	0.125368
6.84	0.180518	0.163869	0.140812	0.122201
6.85	0.216284	0.152126	0.141933	0.121693
6.86	0.230568	0.159879	0.139933	0.120375
6.87	0.206774	0.179462	0.141464	0.117853
6.88	0.200998	0.171815	0.139178	0.123606
6.89	0.199986	0.188167	0.135122	0.126021
6.9	0.207129	0.181905	0.130428	0.123893
6.91	0.169484	0.184649	0.145643	0.135128
6.92	0.183466	0.177924	0.145938	0.122799
6.93	0.195246	0.185217	0.147831	0.125035
6.94	0.165002	0.189118	0.145526	0.122379
6.95	0.192884	0.186212	0.133955	0.12209
6.96	0.20481	0.170888	0.147989	0.118049
6.97	0.217388	0.171645	0.153292	0.116515
6.98	0.191914	0.179861	0.152481	0.121092
6.99	0.172544	0.164033	0.137032	0.121071
7	0.205928	0.163305	0.140563	0.125604
7.01	0.193834	0.1787	0.142425	0.121057
7.02	0.177393	0.164076	0.134949	0.125128
7.03	0.224172	0.169205	0.141325	0.127202
7.04	0.200077	0.179833	0.156065	0.133862
7.05	0.189978	0.204254	0.155481	0.125159
7.06	0.198952	0.175075	0.151424	0.121757
7.07	0.18366	0.189	0.145242	0.130277
7.08	0.187838	0.188431	0.14473	0.139344
7.09	0.189796	0.169555	0.150769	0.144358
7.1	0.183488	0.153301	0.1479	0.131437
7.11	0.177903	0.146079	0.146969	0.126525
7.12	0.16654	0.154016	0.159455	0.126803
7.13	0.167828	0.148992	0.157144	0.134247
7.14	0.163359	0.157839	0.153334	0.117669
7.15	0.15728	0.141666	0.164303	0.123528
7.16	0.18093	0.156588	0.177686	0.118979
7.17	0.2029	0.157094	0.16357	0.124073
7.18	0.201127	0.145414	0.160121	0.121034
7.19	0.192512	0.130127	0.170289	0.12618
7.2	0.197784	0.136138	0.15595	0.118683
7.21	0.178699	0.13756	0.166247	0.117989
7.22	0.170514	0.137565	0.157499	0.1256
7.23	0.182888	0.142707	0.162082	0.127502
7.24	0.175406	0.144939	0.155691	0.12232
7.25	0.173265	0.141062	0.156816	0.126888
7.26	0.179	0.144053	0.167603	0.128136
7.27	0.176621	0.142184	0.154085	0.11937
7.28	0.17067	0.155904	0.145427	0.127378
7.29	0.169993	0.153051	0.13662	0.120109
7.3	0.165328	0.163781	0.147891	0.126723
7.31	0.166019	0.149086	0.147377	0.125375
7.32	0.170391	0.148835	0.153483	0.124105
7.33	0.173198	0.164625	0.159351	0.12988
7.34	0.190223	0.174376	0.164806	0.13748
7.35	0.204385	0.153321	0.156237	0.134471
7.36	0.189764	0.163883	0.165027	0.126135
7.37	0.213492	0.152616	0.180839	0.133216
7.38	0.18405	0.153878	0.174782	0.137514
7.39	0.180586	0.157758	0.173432	0.136267
7.4	0.188773	0.146057	0.174855	0.136506
7.41	0.188153	0.156822	0.173353	0.139077
7.42	0.166307	0.177769	0.166402	0.137055
7.43	0.187894	0.163665	0.165712	0.130762
7.44	0.173616	0.153027	0.157965	0.119468
7.45	0.200314	0.169442	0.176207	0.11823
7.46	0.199461	0.170298	0.168733	0.132874
7.47	0.178037	0.166276	0.183486	0.131386
7.48	0.182923	0.179411	0.186613	0.131279
7.49	0.203588	0.169544	0.160772	0.137733
7.5	0.174839	0.172729	0.161632	0.149349
7.51	0.196647	0.177218	0.154123	0.138188
7.52	0.180244	0.177366	0.151776	0.129731
7.53	0.16398	0.184209	0.146666	0.142666
7.54	0.160135	0.188932	0.156385	0.166399
7.55	0.173994	0.183281	0.148451	0.153476
7.56	0.185294	0.181689	0.153739	0.144544
7.57	0.174966	0.163145	0.166793	0.149025
7.58	0.166899	0.162406	0.171498	0.146077
7.59	0.174303	0.166749	0.182476	0.140601
7.6	0.171825	0.186325	0.176829	0.133668
7.61	0.172014	0.196137	0.174675	0.139391
7.62	0.178488	0.182372	0.169701	0.126854
7.63	0.176038	0.171252	0.163701	0.123576
7.64	0.181069	0.170871	0.157364	0.122571
7.65	0.188873	0.174579	0.161696	0.135496
7.66	0.168481	0.172373	0.159465	0.126829
7.67	0.172706	0.165433	0.1679	0.125492
7.68	0.165934	0.167843	0.173097	0.134587
7.69	0.181209	0.165459	0.16567	0.120798
7.7	0.177868	0.176191	0.16933	0.113062
7.71	0.17639	0.174325	0.169452	0.120272
7.72	0.169201	0.17936	0.156852	0.129807
7.73	0.150672	0.180786	0.158522	0.133949
7.74	0.155347	0.185856	0.179539	0.132861
7.75	0.153405	0.16813	0.191955	0.126208
7.76	0.14749	0.169212	0.176725	0.127923
7.77	0.154971	0.179135	0.180733	0.135213
7.78	0.146853	0.169862	0.176998	0.14353
7.79	0.152426	0.164376	0.177328	0.134091
7.8	0.156166	0.159695	0.191632	0.132716
7.81	0.15165	0.169899	0.206568	0.136028
7.82	0.150226	0.167081	0.199424	0.130071
7.83	0.142302	0.155861	0.215175	0.128829
7.84	0.147928	0.181831	0.202509	0.129137
7.85	0.151377	0.173562	0.219116	0.140347
7.86	0.156703	0.191422	0.191895	0.128564
7.87	0.145051	0.193777	0.181305	0.130879
7.88	0.158038	0.182286	0.16611	0.132326
7.89	0.150795	0.179691	0.167595	0.129417
7.9	0.165613	0.186947	0.161199	0.11236
7.91	0.191192	0.196911	0.176278	0.108997
7.92	0.165181	0.198688	0.196719	0.131846
7.93	0.164484	0.178492	0.174034	0.119637
7.94	0.161082	0.200955	0.16978	0.121809
7.95	0.169437	0.207582	0.172106	0.119796
7.96	0.167886	0.216683	0.174517	0.127677
7.97	0.169636	0.196624	0.18806	0.12058
7.98	0.173354	0.206644	0.21416	0.120958
7.99	0.174765	0.19675	0.193604	0.119523
8	0.153729	0.210824	0.169936	0.110495
8.01	0.151221	0.210543	0.191391	0.115856
8.02	0.1618	0.195311	0.173734	0.11158
8.03	0.169098	0.208353	0.163956	0.11342
8.04	0.177096	0.200021	0.151502	0.128513
8.05	0.172487	0.194135	0.16828	0.136887
8.06	0.174033	0.193427	0.164868	0.12046
8.07	0.172455	0.194541	0.148086	0.118136
8.08	0.162349	0.188375	0.16067	0.10796
8.09	0.168417	0.195262	0.173693	0.117912
8.1	0.168725	0.19416	0.189062	0.11352
8.11	0.16301	0.191767	0.184826	0.112007
8.12	0.155443	0.188005	0.177668	0.108943
8.13	0.156953	0.184844	0.182225	0.114268
8.14	0.146301	0.182859	0.199586	0.127596
8.15	0.155205	0.186927	0.18309	0.125902
8.16	0.171761	0.186337	0.175541	0.125293
8.17	0.179731	0.177768	0.191068	0.135922
8.18	0.155433	0.183501	0.191775	0.135897
8.19	0.16801	0.184113	0.18948	0.146384
8.2	0.169061	0.181082	0.19053	0.148618
8.21	0.166119	0.158434	0.170331	0.137194
8.22	0.169556	0.148062	0.172302	0.152033
8.23	0.156709	0.158814	0.183719	0.128184
8.24	0.164196	0.157199	0.172299	0.13278
8.25	0.173226	0.184225	0.18021	0.13183
8.26	0.170394	0.169011	0.180417	0.126922
8.27	0.169218	0.156786	0.197322	0.125259
8.28	0.168247	0.171896	0.192531	0.129065
8.29	0.166498	0.159767	0.186556	0.143541
8.3	0.18721	0.169891	0.188342	0.154778
8.31	0.159948	0.187607	0.208374	0.16
8.32	0.16715	0.185927	0.206076	0.152389
8.33	0.157997	0.17878	0.207515	0.13231
8.34	0.1639	0.201462	0.23906	0.120632
8.35	0.157319	0.206538	0.228943	0.125229
8.36	0.16509	0.198602	0.215172	0.13737
8.37	0.158978	0.182424	0.188174	0.130761
8.38	0.162388	0.176467	0.214276	0.141099
8.39	0.161286	0.17781	0.208959	0.133352
8.4	0.170358	0.201556	0.191075	0.146396
8.41	0.172501	0.22605	0.19832	0.129809
8.42	0.156102	0.223817	0.179665	0.13032
8.43	0.158098	0.182006	0.196375	0.134131
8.44	0.173075	0.184296	0.175732	0.130634
8.45	0.163896	0.205073	0.183878	0.133714
8.46	0.160442	0.205365	0.198064	0.128024
8.47	0.173568	0.201594	0.179132	0.13248
8.48	0.16274	0.20594	0.180439	0.148266
8.49	0.167908	0.186504	0.201969	0.139357
8.5	0.153085	0.177408	0.184477	0.130703
8.51	0.165813	0.172872	0.203354	0.127134
8.52	0.170261	0.17606	0.198344	0.151616
8.53	0.162741	0.167453	0.184166	0.148698
8.54	0.169317	0.198857	0.177602	0.135312
8.55	0.178243	0.20459	0.195742	0.129429
8.56	0.162964	0.21646	0.194195	0.123424
8.57	0.151772	0.216502	0.204173	0.133127
8.58	0.163262	0.192596	0.184105	0.146536
8.59	0.165496	0.191536	0.193789	0.141477
8.6	0.170688	0.181547	0.202827	0.149567
8.61	0.159738	0.19074	0.211684	0.142699
8.62	0.156621	0.192345	0.20216	0.137034
8.63	0.167815	0.189516	0.190469	0.141032
8.64	0.153712	0.195668	0.206319	0.143731
8.65	0.150962	0.198425	0.185039	0.138016
8.66	0.164286	0.198105	0.191999	0.133217
8.67	0.146434	0.203606	0.185179	0.140457
8.68	0.157949	0.20836	0.182702	0.136582
8.69	0.161691	0.192441	0.179815	0.150071
8.7	0.158026	0.197958	0.177123	0.143684
8.71	0.162123	0.18599	0.185317	0.124028
8.72	0.146902	0.178695	0.17901	0.134476
8.73	0.156845	0.191341	0.189722	0.148407
8.74	0.181823	0.201486	0.173246	0.151359
8.75	0.187643	0.205504	0.171573	0.150962
8.76	0.178884	0.19291	0.186121	0.147948
8.77	0.176151	0.219683	0.190743	0.136958
8.78	0.179885	0.206362	0.178938	0.126696
8.79	0.179712	0.186309	0.206241	0.134409
8.8	0.17253	0.188104	0.193321	0.125336
8.81	0.178856	0.184032	0.181752	0.120042
8.82	0.179321	0.182825	0.16614	0.122732
8.83	0.167494	0.182371	0.186616	0.120682
8.84	0.179258	0.18151	0.166483	0.126125
8.85	0.168481	0.193775	0.176053	0.130313
8.86	0.184681	0.172444	0.185554	0.141811
8.87	0.174494	0.178977	0.176296	0.146723
8.88	0.16062	0.181956	0.183077	0.143859
8.89	0.167614	0.171585	0.180503	0.148781
8.9	0.164752	0.172483	0.18173	0.140519
8.91	0.165458	0.155528	0.179889	0.15241
8.92	0.17337	0.175166	0.174908	0.168278
8.93	0.172251	0.166575	0.181775	0.144449
8.94	0.166743	0.164362	0.1691	0.14595
8.95	0.169598	0.17323	0.161529	0.154199
8.96	0.162749	0.178692	0.182179	0.167164
8.97	0.160382	0.179731	0.175567	0.170377
8.98	0.166392	0.185238	0.168009	0.144128
8.99	0.166771	0.188184	0.182619	0.134028
9	0.157658	0.184241	0.185448	0.137333
9.01	0.175495	0.174002	0.176318	0.13193
9.02	0.168631	0.182205	0.166137	0.133873
9.03	0.169553	0.175093	0.187851	0.145709
9.04	0.165687	0.185486	0.194234	0.143763
9.05	0.159436	0.186006	0.171181	0.147776
9.06	0.166779	0.190258	0.175753	0.137151
9.07	0.164012	0.161522	0.173584	0.12576
9.08	0.162979	0.155867	0.170788	0.133262
9.09	0.143449	0.149193	0.164948	0.141224
9.1	0.13978	0.165102	0.1752	0.130937
9.11	0.142861	0.174049	0.180631	0.147901
9.12	0.154851	0.173553	0.18852	0.138018
9.13	0.152106	0.174941	0.184439	0.131111
9.14	0.148084	0.184107	0.19352	0.117057
9.15	0.155644	0.190591	0.185082	0.123144
9.16	0.163711	0.187961	0.200069	0.116779
9.17	0.161551	0.188478	0.180708	0.135787
9.18	0.147461	0.186005	0.171215	0.144127
9.19	0.147169	0.189448	0.179913	0.160522
9.2	0.144412	0.197635	0.171247	0.135874
9.21	0.145559	0.185807	0.179092	0.135176
9.22	0.146212	0.202064	0.191216	0.122722
9.23	0.14672	0.198907	0.189478	0.131318
9.24	0.148279	0.189719	0.208982	0.131943
9.25	0.136701	0.194355	0.19872	0.140899
9.26	0.145957	0.197711	0.186223	0.140129
9.27	0.156783	0.204343	0.204384	0.127786
9.28	0.159601	0.202949	0.196797	0.138492
9.29	0.166945	0.188839	0.203186	0.129335
9.3	0.152495	0.181017	0.208138	0.150162
9.31	0.135245	0.176483	0.226287	0.149833
9.32	0.145641	0.186847	0.203747	0.149359
9.33	0.142187	0.184343	0.19496	0.145224
9.34	0.136372	0.199174	0.193636	0.149137
9.35	0.148751	0.20486	0.183093	0.149082
9.36	0.151643	0.178893	0.192375	0.125896
9.37	0.170422	0.169444	0.164035	0.113325
9.38	0.154425	0.173582	0.185476	0.12374
9.39	0.145396	0.170142	0.187265	0.122451
9.4	0.145498	0.179812	0.173691	0.116421
9.41	0.142497	0.17867	0.174541	0.118439
9.42	0.14501	0.167051	0.166777	0.118382
9.43	0.160178	0.158846	0.175238	0.117196
9.44	0.162212	0.160025	0.163056	0.131207
9.45	0.173734	0.156011	0.160637	0.119864
9.46	0.158324	0.16862	0.171388	0.119284
9.47	0.164605	0.169976	0.171221	0.129647
9.48	0.169688	0.15125	0.194403	0.12912
9.49	0.179212	0.157775	0.195653	0.12118
9.5	0.164123	0.15584	0.183885	0.117573
9.51	0.177683	0.155612	0.205187	0.128553
9.52	0.164036	0.165764	0.195789	0.139166
9.53	0.160818	0.16052	0.196518	0.128318
9.54	0.159841	0.155632	0.195074	0.13748
9.55	0.168759	0.162419	0.209475	0.123393
9.56	0.174065	0.184975	0.217179	0.134843
9.57	0.171188	0.177434	0.198233	0.132424
9.58	0.184448	0.188966	0.186129	0.127942
9.59	0.176748	0.189497	0.192865	0.103094
9.6	0.182139	0.169291	0.191678	0.113588
9.61	0.172757	0.170082	0.167363	0.122213
9.62	0.160883	0.159521	0.20412	0.117668
9.63	0.173333	0.171747	0.199011	0.113121
9.64	0.175778	0.160164	0.2038	0.114055
9.65	0.158875	0.149928	0.205283	0.104829
9.66	0.186358	0.155335	0.197714	0.108227
9.67	0.170519	0.154796	0.206478	0.103789
9.68	0.164626	0.151958	0.191643	0.0980175
9.69	0.151632	0.151909	0.190278	0.108604
9.7	0.154629	0.156511	0.179386	0.114546
9.71	0.156498	0.142294	0.191456	0.120937
9.72	0.170234	0.142371	0.184843	0.131025
9.73	0.167094	0.13698	0.201628	0.141038
9.74	0.181001	0.139778	0.208219	0.131376
9.75	0.176792	0.150943	0.192185	0.115112
9.76	0.182397	0.152194	0.184085	0.109829
9.77	0.180161	0.158827	0.192668	0.107377
9.78	0.179198	0.155187	0.192086	0.114477
9.79	0.202028	0.14653	0.190175	0.112675
9.8	0.177636	0.143047	0.172136	0.109544
9.81	0.165583	0.145831	0.18991	0.117499
9.82	0.182182	0.163265	0.192206	0.122415
9.83	0.188089	0.16378	0.186751	0.131261
9.84	0.178963	0.150036	0.19595	0.153266
9.85	0.174426	0.142216	0.20156	0.152589
9.86	0.194821	0.143726	0.199198	0.140851
9.87	0.184157	0.160125	0.188902	0.130363
9.88	0.185788	0.147914	0.205796	0.130495
9.89	0.17601	0.150452	0.217193	0.143145
9.9	0.173107	0.161617	0.215556	0.146138
9.91	0.171086	0.16296	0.196526	0.132086
9.92	0.190249	0.175982	0.198522	0.125402
9.93	0.178143	0.176857	0.215847	0.129511
9.94	0.169532	0.183531	0.212126	0.116149
9.95	0.18098	0.190266	0.222247	0.119813
9.96	0.170738	0.169684	0.213303	0.126482
9.97	0.187884	0.169323	0.205745	0.145057
9.98	0.198259	0.158645	0.205809	0.136638
9.99	0.179276	0.15745	0.210879	0.125352
10	0.187515	0.152474	0.208856	0.131695
10.01	0.180855	0.153802	0.20061	0.121351
10.02	0.185085	0.152459	0.193522	0.124516
10.03	0.169536	0.162589	0.189981	0.128513
10.04	0.170522	0.164623	0.203084	0.116519
10.05	0.174059	0.168349	0.217994	0.111494
10.06	0.176551	0.160135	0.208156	0.118776
10.07	0.17751	0.139034	0.222571	0.117865
10.08	0.186687	0.154446	0.214729	0.126294
10.09	0.174436	0.155883	0.212289	0.131243
10.1	0.182301	0.150298	0.205791	0.109123
10.11	0.165343	0.146735	0.204055	0.111119
10.12	0.166957	0.152342	0.198686	0.111291
10.13	0.168769	0.156475	0.187566	0.127009
10.14	0.166894	0.16866	0.170952	0.127052
10.15	0.153949	0.178892	0.1592	0.110761
10.16	0.164595	0.162713	0.168644	0.121898
10.17	0.164703	0.172196	0.179869	0.120945
10.18	0.189104	0.160811	0.193137	0.12537
10.19	0.188675	0.15303	0.18148	0.127765
10.2	0.174322	0.175464	0.157523	0.126956
10.21	0.180856	0.177387	0.167344	0.116088
10.22	0.17311	0.16288	0.154494	0.133153
10.23	0.182296	0.180247	0.169806	0.13331
10.24	0.184042	0.166397	0.181873	0.14781
10.25	0.177081	0.162306	0.189638	0.144071
10.26	0.195017	0.176984	0.175301	0.134325
10.27	0.184395	0.168267	0.17495	0.12285
10.28	0.168626	0.164422	0.180177	0.122979
10.29	0.169263	0.1648	0.177396	0.117182
10.3	0.164493	0.15548	0.174019	0.12143
10.31	0.176294	0.149295	0.186698	0.127542
10.32	0.175532	0.140393	0.187922	0.121035
10.33	0.179988	0.135519	0.191632	0.119049
10.34	0.175332	0.153267	0.19739	0.12658
10.35	0.202416	0.148324	0.22153	0.128288
10.36	0.209034	0.158461	0.224571	0.11368
10.37	0.225925	0.162124	0.210136	0.115044
10.38	0.226917	0.17308	0.207865	0.112974
10.39	0.234959	0.175967	0.188858	0.11521
10.4	0.205833	0.164036	0.189522	0.112034
10.41	0.244992	0.184727	0.191393	0.110817
10.42	0.244372	0.17748	0.17859	0.106968
10.43	0.261058	0.170779	0.178276	0.107486
10.44	0.242557	0.162013	0.178477	0.104469
10.45	0.239302	0.160602	0.178957	0.10243
10.46	0.226636	0.166907	0.176518	0.109428
10.47	0.215326	0.16085	0.176907	0.10353
10.48	0.228539	0.163019	0.164373	0.10234
10.49	0.205443	0.16829	0.164609	0.1013
10.5	0.181983	0.167409	0.153216	0.113761
10.51	0.195737	0.178804	0.158131	0.113163
10.52	0.182995	0.192638	0.175317	0.127059
10.53	0.193609	0.184145	0.160191	0.117767
10.54	0.205713	0.181512	0.154942	0.11839
10.55	0.211949	0.186411	0.144628	0.103295
10.56	0.241544	0.167957	0.168473	0.113845
10.57	0.244772	0.174431	0.157233	0.119576
10.58	0.250484	0.168322	0.142856	0.126613
10.59	0.273524	0.187231	0.148231	0.125898
10.6	0.273872	0.173522	0.147702	0.127385
10.61	0.262741	0.196453	0.14638	0.134341
10.62	0.264662	0.198835	0.148637	0.116145
10.63	0.266694	0.180426	0.135226	0.122606
10.64	0.255636	0.15808	0.141984	0.127094
10.65	0.23927	0.176691	0.152799	0.134986
10.66	0.242819	0.164251	0.151805	0.122989
10.67	0.260549	0.15261	0.140704	0.136023
10.68	0.263268	0.174474	0.142412	0.150755
10.69	0.266692	0.170655	0.14761	0.124194
10.7	0.252634	0.175551	0.145041	0.126548
10.71	0.243048	0.161292	0.134868	0.156814
10.72	0.261997	0.184781	0.146113	0.138124
10.73	0.262469	0.175074	0.149299	0.15019
10.74	0.26301	0.175655	0.159304	0.144689
10.75	0.250327	0.181728	0.176928	0.142136
10.76	0.247611	0.179663	0.142989	0.115822
10.77	0.240129	0.183059	0.161833	0.128777
10.78	0.239462	0.18774	0.157546	0.130608
10.79	0.251297	0.165617	0.171484	0.12622
10.8	0.229533	0.157312	0.158109	0.127404
10.81	0.230422	0.176779	0.158673	0.116609
10.82	0.217321	0.17434	0.174852	0.124379
10.83	0.209049	0.176462	0.157151	0.122822
10.84	0.199332	0.17377	0.164571	0.134607
10.85	0.194816	0.165338	0.171547	0.131228
10.86	0.220449	0.166835	0.166031	0.129824
10.87	0.212548	0.18549	0.162218	0.121004
10.88	0.198238	0.18218	0.162322	0.121191
10.89	0.200697	0.186216	0.164314	0.126105
10.9	0.206294	0.177742	0.15644	0.126689
10.91	0.213795	0.160995	0.167691	0.117929
10.92	0.221603	0.151106	0.183332	0.115017
10.93	0.225468	0.153744	0.182839	0.1205
10.94	0.228017	0.164836	0.178244	0.124577
10.95	0.207414	0.168831	0.173525	0.127189
10.96	0.217338	0.164994	0.181661	0.126034
10.97	0.21122	0.1736	0.19303	0.128931
10.98	0.21366	0.175587	0.181933	0.130321
10.99	0.235873	0.193517	0.199685	0.118819
11	0.241045	0.187135	0.189721	0.116514
11.01	0.238143	0.177063	0.197089	0.124776
11.02	0.213281	0.209783	0.179281	0.126915
11.03	0.195137	0.19771	0.183867	0.11623
11.04	0.230097	0.18876	0.18863	0.117261
11.05	0.215798	0.206181	0.182879	0.12291
11.06	0.212647	0.196422	0.174598	0.118205
11.07	0.218154	0.205845	0.154803	0.112143
11.08	0.221968	0.202975	0.160726	0.115241
11.09	0.227798	0.1902	0.17165	0.114053
11.1	0.225234	0.20331	0.162043	0.119066
11.11	0.210842	0.211914	0.167069	0.12151
11.12	0.19865	0.224108	0.167313	0.12235
11.13	0.205841	0.234804	0.149941	0.135843
11.14	0.22205	0.237864	0.154584	0.135334
11.15	0.237746	0.214038	0.154387	0.124005
11.16	0.214786	0.208821	0.154981	0.130939
11.17	0.211102	0.230075	0.154918	0.127795
11.18	0.21975	0.232432	0.161502	0.117863
11.19	0.222714	0.241594	0.156778	0.130117
11.2	0.202187	0.268893	0.179646	0.125812
11.21	0.208353	0.253647	0.192782	0.143875
11.22	0.203327	0.252655	0.171431	0.137554
11.23	0.210148	0.235222	0.189328	0.12853
11.24	0.211511	0.210647	0.16045	0.124697
11.25	0.199377	0.233513	0.149938	0.115381
11.26	0.194019	0.218172	0.138712	0.111876
11.27	0.196466	0.222412	0.145008	0.137218
11.28	0.175859	0.216404	0.153868	0.11751
11.29	0.198613	0.236789	0.137874	0.127876
11.3	0.185665	0.254872	0.139827	0.132862
11.31	0.191624	0.242867	0.137891	0.134246
11.32	0.18798	0.239626	0.129494	0.128093
11.33	0.186662	0.250688	0.135089	0.125648
11.34	0.186539	0.242894	0.13848	0.13673
11.35	0.187977	0.245553	0.142267	0.132329
11.36	0.211025	0.231845	0.150133	0.124829
11.37	0.192332	0.217568	0.14872	0.142061
11.38	0.187256	0.193949	0.160084	0.143901
11.39	0.191582	0.218326	0.17778	0.124452
11.4	0.203119	0.215015	0.18788	0.131799
11.41	0.186889	0.207287	0.166635	0.114963
11.42	0.191921	0.205068	0.168767	0.133764
11.43	0.191039	0.206049	0.159917	0.135958
11.44	0.185808	0.226375	0.154443	0.152274
11.45	0.186512	0.241479	0.156305	0.140321
11.46	0.185011	0.23024	0.145611	0.130657
11.47	0.193811	0.236573	0.14723	0.124912
11.48	0.190478	0.239152	0.167277	0.129113
11.49	0.18626	0.239568	0.167498	0.13005
11.5	0.178069	0.248666	0.169231	0.122359
11.51	0.198538	0.234605	0.153272	0.133216
11.52	0.188127	0.271122	0.153091	0.138213
11.53	0.192376	0.245583	0.147982	0.139895
11.54	0.186349	0.249752	0.153327	0.142199
11.55	0.187348	0.244416	0.141158	0.17042
11.56	0.192283	0.251588	0.146229	0.16869
11.57	0.188057	0.246239	0.15452	0.152039
11.58	0.184817	0.256935	0.153774	0.162053
11.59	0.188145	0.265672	0.14419	0.154296
11.6	0.170266	0.255617	0.149694	0.146537
11.61	0.173506	0.251347	0.158749	0.129993
11.62	0.173619	0.245263	0.175857	0.148216
11.63	0.16627	0.233561	0.159346	0.151302
11.64	0.174801	0.208831	0.173879	0.151675
11.65	0.160482	0.205114	0.159135	0.147455
11.66	0.171906	0.222104	0.157	0.138738
11.67	0.17635	0.215715	0.156437	0.133033
11.68	0.174338	0.208466	0.142246	0.133781
11.69	0.174541	0.219341	0.156973	0.123788
11.7	0.171433	0.210359	0.153983	0.135448
11.71	0.169149	0.195059	0.163932	0.127753
11.72	0.164822	0.235791	0.153344	0.147195
11.73	0.172138	0.213926	0.143722	0.139473
11.74	0.176553	0.215752	0.163857	0.125521
11.75	0.180053	0.218099	0.149035	0.149492
11.76	0.172838	0.212658	0.150776	0.150985
11.77	0.186361	0.21862	0.159456	0.15577
11.78	0.176442	0.230375	0.154172	0.152568
11.79	0.184906	0.231021	0.164633	0.152175
11.8	0.178932	0.209753	0.163438	0.15427
11.81	0.17898	0.225381	0.162158	0.172164
11.82	0.184456	0.217989	0.164907	0.177837
11.83	0.178629	0.23063	0.154562	0.162073
11.84	0.170758	0.223557	0.156701	0.163953
11.85	0.178385	0.233542	0.172536	0.162662
11.86	0.188249	0.223944	0.172423	0.164361
11.87	0.175869	0.210342	0.175086	0.180221
11.88	0.187958	0.229969	0.162505	0.185025
11.89	0.175456	0.220683	0.174519	0.17653
11.9	0.181154	0.204187	0.171131	0.177885
11.91	0.17852	0.227385	0.168828	0.167018
11.92	0.187988	0.216353	0.182103	0.159715
11.93	0.191783	0.205631	0.195135	0.158459
11.94	0.194634	0.199781	0.187855	0.161449
11.95	0.189374	0.220919	0.203272	0.166977
11.96	0.174919	0.23645	0.193949	0.161402
11.97	0.183631	0.221729	0.189877	0.162789
11.98	0.198089	0.214945	0.183265	0.161719
11.99	0.179084	0.197214	0.175368	0.160281
12	0.17279	0.195588	0.156957	0.153956
12.01	0.194686	0.200699	0.158301	0.186143
12.02	0.190832	0.223815	0.153147	0.160451
12.03	0.201019	0.214234	0.15122	0.147405
12.04	0.201886	0.212958	0.157298	0.131733
12.05	0.180174	0.220652	0.152194	0.134584
12.06	0.183415	0.211786	0.151928	0.131267
12.07	0.17637	0.203658	0.158353	0.14519
12.08	0.188261	0.205721	0.160908	0.154176
12.09	0.178319	0.224411	0.15192	0.149738
12.1	0.179603	0.22656	0.159793	0.137783
12.11	0.171081	0.244175	0.147196	0.139599
12.12	0.16907	0.24803	0.147021	0.165571
12.13	0.174044	0.23804	0.152546	0.152103
12.14	0.190144	0.255503	0.15135	0.150051
12.15	0.189232	0.252143	0.154245	0.140025
12.16	0.196654	0.248527	0.149172	0.150219
12.17	0.205255	0.268375	0.151852	0.138346
12.18	0.186297	0.271547	0.169652	0.132046
12.19	0.183634	0.252328	0.160772	0.147119
12.2	0.1926	0.254616	0.157779	0.144853
12.21	0.207236	0.246711	0.164809	0.140671
12.22	0.197165	0.224905	0.151207	0.149549
12.23	0.180619	0.245665	0.143878	0.152687
12.24	0.18915	0.235508	0.150452	0.158057
12.25	0.196694	0.235109	0.142359	0.140267
12.26	0.190113	0.230057	0.144334	0.144473
12.27	0.183247	0.193152	0.140774	0.166495
12.28	0.186416	0.200939	0.147461	0.16255
12.29	0.200612	0.206224	0.150354	0.16961
12.3	0.208556	0.197726	0.156811	0.16125
12.31	0.19327	0.222518	0.151555	0.159974
12.32	0.191669	0.231164	0.157236	0.160729
12.33	0.203165	0.236205	0.162126	0.17635
12.34	0.201492	0.217211	0.161976	0.174487
12.35	0.200189	0.210489	0.166488	0.188928
12.36	0.214971	0.194365	0.154393	0.183252
12.37	0.199724	0.175926	0.153882	0.169565
12.38	0.20253	0.175434	0.147256	0.176787
12.39	0.202257	0.206781	0.15998	0.169234
12.4	0.202693	0.181458	0.15544	0.156494
12.41	0.196687	0.197441	0.145224	0.15307
12.42	0.190218	0.185885	0.155704	0.176154
12.43	0.181915	0.166896	0.137572	0.170198
12.44	0.174641	0.165806	0.16002	0.164328
12.45	0.168378	0.159053	0.167618	0.129323
12.46	0.177989	0.158328	0.166424	0.137626
12.47	0.175766	0.165753	0.154068	0.128562
12.48	0.173456	0.165747	0.147917	0.125022
12.49	0.176085	0.160894	0.159615	0.117221
12.5	0.195331	0.175143	0.169103	0.115461
12.51	0.195205	0.177575	0.153343	0.108892
12.52	0.191817	0.174258	0.16043	0.123042
12.53	0.19798	0.177348	0.16184	0.125365
12.54	0.201037	0.206232	0.175529	0.107469
12.55	0.210389	0.191776	0.168426	0.110541
12.56	0.216527	0.205817	0.162119	0.123709
12.57	0.208972	0.209099	0.173504	0.129541
12.58	0.205555	0.216267	0.187813	0.1473
12.59	0.201067	0.205007	0.192169	0.130427
12.6	0.205705	0.204722	0.181313	0.118313
12.61	0.202728	0.221247	0.188057	0.133622
12.62	0.180534	0.210656	0.188731	0.139408
12.63	0.186655	0.222737	0.191878	0.122126
12.64	0.185606	0.218176	0.185747	0.13262
12.65	0.174332	0.20628	0.195624	0.127551
12.66	0.181948	0.227119	0.175144	0.129936
12.67	0.187359	0.244162	0.17348	0.136732
12.68	0.198577	0.221761	0.176848	0.133075
12.69	0.208961	0.206022	0.18361	0.128039
12.7	0.192734	0.20276	0.171686	0.122815
12.71	0.214579	0.220209	0.154356	0.127296
12.72	0.209927	0.209519	0.16901	0.135433
12.73	0.204429	0.208056	0.175831	0.122168
12.74	0.21833	0.21878	0.175033	0.117517
12.75	0.213109	0.199817	0.168679	0.125735
12.76	0.21671	0.222037	0.171172	0.126734
12.77	0.220668	0.221944	0.176721	0.134799
12.78	0.187959	0.22254	0.153553	0.13587
12.79	0.187932	0.221609	0.164442	0.134014
12.8	0.190783	0.23534	0.154202	0.143258
12.81	0.199825	0.240475	0.162743	0.125831
12.82	0.18257	0.256438	0.170721	0.123753
12.83	0.178898	0.268726	0.185427	0.123169
12.84	0.189516	0.265962	0.17411	0.119141
12.85	0.188892	0.256152	0.185048	0.127238
12.86	0.182964	0.250819	0.169355	0.131678
12.87	0.17252	0.267593	0.199503	0.130918
12.88	0.175907	0.254351	0.203202	0.132556
12.89	0.189541	0.251651	0.175803	0.121257
12.9	0.19338	0.213455	0.186619	0.141508
12.91	0.196144	0.223231	0.208324	0.138731
12.92	0.210771	0.244314	0.202676	0.126558
12.93	0.192255	0.226142	0.200398	0.130731
12.94	0.199954	0.245162	0.186653	0.134573
12.95	0.194501	0.241741	0.204939	0.132443
12.96	0.205806	0.229736	0.180004	0.145109
12.97	0.189707	0.198066	0.195845	0.154456
12.98	0.175893	0.207546	0.18718	0.165416
12.99	0.186011	0.221078	0.197938	0.146133
13	0.195345	0.211701	0.194156	0.139995
13.01	0.204129	0.207961	0.167132	0.135304
13.02	0.201989	0.205103	0.175272	0.127294
13.03	0.19329	0.201338	0.178413	0.134248
13.04	0.18737	0.2245	0.188832	0.135945
13.05	0.185823	0.233888	0.177866	0.134848
13.06	0.175065	0.219056	0.173247	0.132934
13.07	0.183105	0.22382	0.171496	0.12683
13.08	0.181783	0.221925	0.191004	0.125654
13.09	0.174698	0.214196	0.186832	0.144171
13.1	0.173875	0.197291	0.19455	0.129055
13.11	0.173654	0.218133	0.195067	0.11695
13.12	0.187274	0.237772	0.180134	0.132265
13.13	0.178289	0.235925	0.185252	0.128064
13.14	0.175124	0.216254	0.201989	0.13528
13.15	0.179222	0.19426	0.19602	0.132202
13.16	0.191491	0.209498	0.189828	0.131128
13.17	0.181846	0.222341	0.186803	0.130473
13.18	0.185431	0.224431	0.180345	0.13066
13.19	0.176757	0.216365	0.193067	0.11911
13.2	0.178258	0.203195	0.199477	0.128945
13.21	0.185335	0.193038	0.212575	0.128001
13.22	0.189971	0.194915	0.223278	0.126796
13.23	0.185364	0.187179	0.210318	0.128229
13.24	0.189798	0.17937	0.187244	0.122329
13.25	0.185468	0.178409	0.18015	0.123651
13.26	0.179591	0.174665	0.163658	0.121842
13.27	0.182737	0.190506	0.185281	0.134886
13.28	0.181881	0.184646	0.196606	0.128506
13.29	0.196594	0.17723	0.184841	0.12252
13.3	0.188606	0.181184	0.175417	0.127589
13.31	0.185796	0.163839	0.168876	0.130643
13.32	0.182777	0.14865	0.178305	0.125803
13.33	0.186295	0.163807	0.182464	0.126699
13.34	0.17844	0.163662	0.173362	0.128966
13.35	0.198789	0.170276	0.169143	0.128675
13.36	0.202168	0.179658	0.171127	0.143977
13.37	0.19154	0.175799	0.162683	0.136495
13.38	0.202287	0.173674	0.176163	0.154315
13.39	0.213153	0.171967	0.183136	0.150848
13.4	0.201512	0.164579	0.170472	0.135349
13.41	0.177433	0.165936	0.17837	0.129299
13.42	0.175387	0.168339	0.1662	0.121227
13.43	0.175887	0.162011	0.164727	0.121955
13.44	0.17762	0.164098	0.166621	0.123801
13.45	0.170601	0.164297	0.182155	0.133296
13.46	0.171039	0.167809	0.153767	0.131657
13.47	0.165944	0.174888	0.166593	0.135303
13.48	0.175496	0.175483	0.162767	0.143207
13.49	0.175601	0.165962	0.161927	0.136649
13.5	0.182174	0.17766	0.167008	0.126027
13.51	0.171153	0.172813	0.160742	0.122885
13.52	0.179529	0.183187	0.163637	0.137989
13.53	0.174937	0.183048	0.159246	0.132052
13.54	0.179908	0.171467	0.157179	0.118026
13.55	0.165493	0.1644	0.164354	0.129881
13.56	0.179807	0.178654	0.152579	0.139494
13.57	0.184811	0.17546	0.159346	0.144755
13.58	0.179291	0.164526	0.154839	0.149461
13.59	0.180104	0.175465	0.132447	0.132972
13.6	0.174968	0.168095	0.143236	0.148748
13.61	0.187651	0.152526	0.141875	0.146768
13.62	0.175108	0.162482	0.144409	0.136569
13.63	0.182608	0.169141	0.147361	0.134374
13.64	0.169298	0.159345	0.160737	0.12367
13.65	0.160802	0.167972	0.170341	0.138431
13.66	0.168517	0.171699	0.165881	0.139577
13.67	0.168937	0.174787	0.15777	0.128999
13.68	0.170722	0.164145	0.143431	0.116185
13.69	0.159626	0.165008	0.151411	0.117461
13.7	0.167054	0.180076	0.152939	0.125489
13.71	0.172879	0.197185	0.169127	0.119061
13.72	0.172957	0.168468	0.161878	0.121301
13.73	0.170678	0.184272	0.150576	0.121901
13.74	0.167729	0.157516	0.154261	0.115853
13.75	0.183427	0.154986	0.150831	0.116217
13.76	0.180087	0.16066	0.155589	0.115178
13.77	0.177603	0.154155	0.162414	0.118666
13.78	0.180401	0.150814	0.155512	0.107862
13.79	0.183146	0.160802	0.143572	0.109123
13.8	0.188054	0.177715	0.156356	0.119561
13.81	0.202928	0.17375	0.161616	0.123063
13.82	0.196907	0.16142	0.153837	0.118541
13.83	0.200801	0.151052	0.160619	0.11415
13.84	0.20982	0.152784	0.148194	0.117858
13.85	0.214925	0.168332	0.14785	0.112333
13.86	0.199364	0.179555	0.138924	0.115519
13.87	0.210773	0.172418	0.141188	0.10882
13.88	0.203967	0.170358	0.153922	0.114242
13.89	0.185185	0.159402	0.146335	0.109211
13.9	0.197574	0.154031	0.145562	0.112239
13.91	0.194227	0.173681	0.149118	0.114293
13.92	0.203008	0.156043	0.170236	0.131402
13.93	0.202295	0.16109	0.195828	0.133168
13.94	0.186216	0.162132	0.1793	0.131633
13.95	0.18121	0.164561	0.172808	0.132438
13.96	0.186035	0.150801	0.173022	0.122537
13.97	0.183158	0.167683	0.171814	0.124955
13.98	0.184662	0.14673	0.151037	0.134612
13.99	0.179779	0.158262	0.159735	0.136475
14	0.170594	0.142819	0.170113	0.138459
14.01	0.186689	0.147762	0.160574	0.124141
14.02	0.175417	0.166465	0.170354	0.123172
14.03	0.196458	0.172649	0.15869	0.13309
14.04	0.198397	0.187698	0.158484	0.139934
14.05	0.192579	0.193431	0.144286	0.142921
14.06	0.205587	0.169846	0.142686	0.139426
14.07	0.200528	0.167225	0.147224	0.124326
14.08	0.197133	0.188084	0.132819	0.127182
14.09	0.186946	0.187317	0.141258	0.131216
14.1	0.176548	0.201162	0.166713	0.125866
14.11	0.178055	0.211733	0.1439	0.135363
14.12	0.189519	0.191378	0.155482	0.125794
14.13	0.181348	0.213325	0.162483	0.140293
14.14	0.175529	0.184835	0.153834	0.159484
14.15	0.183166	0.182872	0.150147	0.157332
14.16	0.180011	0.190614	0.148631	0.160248
14.17	0.177752	0.198714	0.146948	0.160953
14.18	0.18565	0.190409	0.136042	0.163048
14.19	0.175771	0.189009	0.136472	0.143207
14.2	0.183622	0.170962	0.127581	0.127988
14.21	0.17297	0.171232	0.145957	0.129123
14.22	0.173083	0.167697	0.144078	0.124067
14.23	0.169013	0.150006	0.169964	0.132082
14.24	0.19038	0.14124	0.16416	0.127571
14.25	0.181805	0.156555	0.154102	0.123027
14.26	0.191131	0.16928	0.156231	0.133035
14.27	0.185267	0.158986	0.163052	0.12559
14.28	0.17409	0.161061	0.154856	0.119385
14.29	0.177796	0.162763	0.159174	0.116778
14.3	0.176016	0.15722	0.151493	0.118568
14.31	0.176244	0.147857	0.169401	0.114365
14.32	0.181723	0.138109	0.153535	0.123371
14.33	0.176644	0.13505	0.150427	0.119343
14.34	0.174868	0.14142	0.162378	0.129509
14.35	0.17767	0.17412	0.156336	0.129795
14.36	0.178785	0.16094	0.170298	0.12486
14.37	0.179802	0.162387	0.14555	0.120919
14.38	0.202644	0.167202	0.137411	0.119544
14.39	0.201061	0.166386	0.142466	0.125461
14.4	0.206549	0.178951	0.151179	0.129735
14.41	0.219294	0.177715	0.144303	0.137547
14.42	0.222609	0.156077	0.140489	0.148439
14.43	0.241594	0.176285	0.151704	0.149219
14.44	0.250471	0.188238	0.130082	0.157766
14.45	0.244129	0.189356	0.12884	0.15524
14.46	0.228607	0.208487	0.128403	0.153237
14.47	0.221049	0.218502	0.147243	0.151286
14.48	0.200219	0.21385	0.148811	0.135861
14.49	0.217514	0.216642	0.150769	0.153641
14.5	0.205486	0.244889	0.13647	0.16051
14.51	0.207308	0.239078	0.14474	0.153648
14.52	0.211448	0.22484	0.139237	0.148087
14.53	0.205032	0.207345	0.135767	0.125757
14.54	0.190082	0.211586	0.148971	0.125052
14.55	0.189909	0.184576	0.141417	0.118197
14.56	0.20151	0.184262	0.144762	0.125056
14.57	0.192001	0.205043	0.146956	0.132943
14.58	0.206945	0.187982	0.150134	0.127916
14.59	0.197708	0.17315	0.147659	0.142376
14.6	0.192145	0.165072	0.150723	0.144468
14.61	0.188157	0.148819	0.144883	0.136425
14.62	0.178147	0.167569	0.140117	0.146478
14.63	0.186262	0.173639	0.141224	0.149983
14.64	0.171489	0.181785	0.135513	0.128555
14.65	0.17725	0.187522	0.150325	0.147908
14.66	0.178388	0.167676	0.138908	0.15373
14.67	0.192126	0.174914	0.140345	0.157409
14.68	0.202105	0.170204	0.140394	0.141751
14.69	0.210204	0.192063	0.142464	0.147023
14.7	0.211275	0.186017	0.13977	0.138563
14.71	0.193021	0.168804	0.148806	0.122812
14.72	0.177897	0.189843	0.164205	0.11519
14.73	0.178243	0.180615	0.148068	0.122845
14.74	0.174213	0.168807	0.16335	0.142146
14.75	0.171908	0.185868	0.15209	0.141127
14.76	0.179246	0.192963	0.153672	0.135114
14.77	0.176364	0.18808	0.147881	0.119272
14.78	0.179477	0.170325	0.147863	0.128082
14.79	0.180801	0.183083	0.159274	0.144147
14.8	0.18211	0.191633	0.15312	0.138338
14.81	0.190469	0.204293	0.158638	0.14012
14.82	0.182624	0.209237	0.154797	0.134039
14.83	0.179388	0.199231	0.155344	0.134741
14.84	0.18124	0.196648	0.139173	0.126763
14.85	0.188261	0.203399	0.153877	0.12402
14.86	0.174182	0.182022	0.15866	0.131763
14.87	0.169751	0.197816	0.139155	0.154977
14.88	0.171096	0.202296	0.150357	0.139443
14.89	0.167547	0.207441	0.142366	0.131224
14.9	0.207164	0.204878	0.134763	0.133385
14.91	0.176637	0.183225	0.141081	0.130394
14.92	0.172861	0.179054	0.128833	0.135199
14.93	0.17515	0.182681	0.146864	0.140425
14.94	0.168304	0.194478	0.156561	0.138369
14.95	0.157772	0.186147	0.134193	0.166163
14.96	0.157334	0.184642	0.136632	0.141886
14.97	0.156599	0.175872	0.139428	0.130987
14.98	0.171632	0.184789	0.141739	0.146371
14.99	0.173341	0.191347	0.14242	0.141552
15	0.175955	0.190836	0.149921	0.156694
15.01	0.201538	0.21618	0.172032	0.155998
15.02	0.20543	0.219965	0.156078	0.134625
15.03	0.210789	0.209709	0.155235	0.155276
15.04	0.207476	0.205086	0.164351	0.127078
15.05	0.191855	0.194052	0.144804	0.124278
15.06	0.184476	0.195576	0.154458	0.131408
15.07	0.192738	0.189893	0.139844	0.129799
15.08	0.179702	0.18816	0.146477	0.122945
15.09	0.19004	0.172345	0.128132	0.122375
15.1	0.201905	0.182882	0.136374	0.117761
15.11	0.189163	0.176506	0.136832	0.12105
15.12	0.168701	0.181501	0.142587	0.118935
15.13	0.176435	0.183559	0.137629	0.125882
15.14	0.185469	0.197031	0.138444	0.142273
15.15	0.186584	0.184794	0.131078	0.179214
15.16	0.176683	0.190403	0.136131	0.171644
15.17	0.173958	0.172915	0.135139	0.174307
15.18	0.176949	0.161523	0.132942	0.166043
15.19	0.180297	0.16975	0.13408	0.157616
15.2	0.174253	0.181157	0.130826	0.158573
15.21	0.180437	0.179	0.138543	0.163736
15.22	0.178087	0.167746	0.127185	0.144346
15.23	0.169098	0.163086	0.142379	0.142556
15.24	0.180909	0.172455	0.159421	0.150557
15.25	0.169992	0.167456	0.173645	0.148405
15.26	0.169611	0.16853	0.151997	0.152033
15.27	0.167135	0.18153	0.161214	0.178694
15.28	0.187351	0.170245	0.173891	0.166975
15.29	0.195117	0.158091	0.170461	0.175665
15.3	0.18708	0.17603	0.176549	0.164714
15.31	0.170378	0.171468	0.177404	0.16568
15.32	0.182636	0.183512	0.160542	0.153019
15.33	0.168903	0.185444	0.153729	0.157805
15.34	0.15325	0.182483	0.150773	0.168473
15.35	0.15989	0.17313	0.144571	0.167286
15.36	0.15702	0.169691	0.164619	0.187634
15.37	0.176407	0.167426	0.156777	0.16865
15.38	0.199339	0.171449	0.150272	0.14919
15.39	0.196768	0.176324	0.144491	0.154375
15.4	0.170906	0.169709	0.146362	0.154531
15.41	0.160385	0.172294	0.144826	0.143083
15.42	0.177332	0.185321	0.149535	0.160101
15.43	0.174185	0.155491	0.158303	0.160955
15.44	0.175278	0.147407	0.15064	0.165539
15.45	0.176147	0.159791	0.157262	0.152979
15.46	0.175567	0.155779	0.15684	0.151513
15.47	0.178317	0.145233	0.167488	0.160564
15.48	0.188352	0.151021	0.163814	0.164129
15.49	0.205291	0.143582	0.166428	0.182535
15.5	0.195628	0.165401	0.166501	0.162491
15.51	0.191933	0.155334	0.161995	0.188199
15.52	0.212985	0.149572	0.182361	0.181489
15.53	0.219107	0.17005	0.159739	0.17339
15.54	0.222406	0.159484	0.165808	0.167462
15.55	0.209701	0.169327	0.171012	0.165407
15.56	0.186877	0.179247	0.189607	0.166745
15.57	0.196437	0.166337	0.165888	0.157198
15.58	0.180689	0.167579	0.168035	0.165794
15.59	0.182255	0.17888	0.171939	0.157277
15.6	0.161662	0.159368	0.167497	0.146214
15.61	0.17269	0.169025	0.165657	0.156346
15.62	0.165405	0.18729	0.184251	0.135552
15.63	0.177517	0.193958	0.167085	0.148428
15.64	0.163862	0.180961	0.167837	0.145707
15.65	0.173887	0.194378	0.164489	0.140721
15.66	0.173263	0.191759	0.178239	0.142655
15.67	0.169876	0.185723	0.181008	0.132816
15.68	0.167838	0.179512	0.17638	0.147757
15.69	0.171883	0.185152	0.170608	0.132467
15.7	0.195315	0.185108	0.180506	0.129118
15.71	0.206054	0.173764	0.202043	0.16994
15.72	0.182377	0.177407	0.198949	0.167214
15.73	0.198643	0.186576	0.187348	0.170964
15.74	0.172147	0.181753	0.180823	0.163129
15.75	0.199868	0.193043	0.160329	0.149105
15.76	0.195222	0.187204	0.176256	0.146182
15.77	0.208048	0.183752	0.172115	0.147452
15.78	0.179744	0.191006	0.173427	0.147712
15.79	0.197652	0.179967	0.183569	0.145488
15.8	0.202754	0.190485	0.181158	0.154466
15.81	0.199092	0.199186	0.174983	0.172853
15.82	0.188248	0.205194	0.169889	0.179583
15.83	0.188582	0.201208	0.181616	0.160398
15.84	0.184342	0.203595	0.194234	0.140931
15.85	0.171314	0.193664	0.180132	0.143741
15.86	0.166748	0.183913	0.177943	0.142615
15.87	0.166558	0.19136	0.169893	0.152247
15.88	0.158278	0.189689	0.177325	0.144165
15.89	0.157805	0.209329	0.191513	0.125962
15.9	0.161105	0.197683	0.185295	0.143487
15.91	0.158182	0.193314	0.207952	0.156639
15.92	0.162648	0.189367	0.186649	0.145557
15.93	0.181881	0.19641	0.19615	0.143288
15.94	0.207732	0.199071	0.195017	0.150438
15.95	0.199061	0.198127	0.200139	0.146263
15.96	0.181622	0.22563	0.211603	0.152668
15.97	0.167961	0.233133	0.19256	0.151025
15.98	0.167194	0.231817	0.18748	0.156166
15.99	0.167148	0.236124	0.182784	0.144818
16	0.180585	0.231842	0.178197	0.141155
16.01	0.172329	0.203661	0.205318	0.159187
16.02	0.184302	0.198411	0.195358	0.133767
16.03	0.177986	0.220027	0.18448	0.126652
16.04	0.178176	0.213651	0.181096	0.136012
16.05	0.170359	0.200332	0.195306	0.129295
16.06	0.188259	0.203654	0.180905	0.142829
16.07	0.180762	0.206405	0.169041	0.134258
16.08	0.171602	0.199023	0.162959	0.156002
16.09	0.162638	0.175532	0.173132	0.155421
16.1	0.160766	0.180017	0.15696	0.151058
16.11	0.158602	0.186165	0.168629	0.145901
16.12	0.171034	0.17358	0.166049	0.175028
16.13	0.168456	0.182475	0.173149	0.191397
16.14	0.173926	0.201762	0.195618	0.193403
16.15	0.160719	0.189371	0.171332	0.162169
16.16	0.161643	0.200661	0.167983	0.181898
16.17	0.183982	0.206503	0.171797	0.172896
16.18	0.176638	0.237308	0.167239	0.187044
16.19	0.183716	0.228037	0.169245	0.183981
16.2	0.166829	0.220117	0.172022	0.18452
16.21	0.169831	0.202181	0.162627	0.182965
16.22	0.165738	0.196594	0.161802	0.169948
16.23	0.175126	0.197199	0.162861	0.182701
16.24	0.169334	0.197327	0.166584	0.18341
16.25	0.16481	0.196906	0.161837	0.184435
16.26	0.169963	0.203958	0.17973	0.180179
16.27	0.168333	0.211201	0.180556	0.183668
16.28	0.175038	0.207195	0.175797	0.165084
16.29	0.168185	0.21593	0.167922	0.170221
16.3	0.172184	0.229585	0.189563	0.205345
16.31	0.172747	0.2218	0.198131	0.194196
16.32	0.166746	0.212017	0.198417	0.202885
16.33	0.165207	0.189067	0.191398	0.198365
16.34	0.165079	0.186461	0.169043	0.183086
16.35	0.172568	0.196914	0.177929	0.171803
16.36	0.16223	0.197494	0.175242	0.15942
16.37	0.168971	0.213985	0.194493	0.186532
16.38	0.170066	0.21964	0.176351	0.187816
16.39	0.171912	0.204786	0.184217	0.167689
16.4	0.17207	0.190738	0.197707	0.197551
16.41	0.163814	0.207718	0.186556	0.169614
16.42	0.169173	0.209618	0.169652	0.170138
16.43	0.179653	0.185658	0.179207	0.162439
16.44	0.175611	0.175504	0.185829	0.160355
16.45	0.156174	0.173234	0.187088	0.166471
16.46	0.190896	0.187874	0.16622	0.144094
16.47	0.183069	0.19585	0.166282	0.138275
16.48	0.195211	0.187256	0.157002	0.154048
16.49	0.181294	0.178421	0.166403	0.163466
16.5	0.172058	0.191283	0.172098	0.164522
16.51	0.175404	0.185805	0.16132	0.149939
16.52	0.182754	0.204287	0.166665	0.143076
16.53	0.200722	0.2111	0.165171	0.158075
16.54	0.192628	0.197225	0.169081	0.152973
16.55	0.18928	0.200254	0.175927	0.15039
16.56	0.192377	0.18587	0.171066	0.16397
16.57	0.189045	0.186739	0.152767	0.183945
16.58	0.184802	0.188379	0.160416	0.199486
16.59	0.186773	0.196082	0.155864	0.186591
16.6	0.195549	0.192475	0.161683	0.167035
16.61	0.188852	0.17517	0.165433	0.159992
16.62	0.190145	0.178645	0.15524	0.150248
16.63	0.177177	0.186685	0.159856	0.15893
16.64	0.183803	0.186068	0.168637	0.177805
16.65	0.181996	0.207379	0.178464	0.168521
16.66	0.191925	0.202045	0.170349	0.177313
16.67	0.187661	0.190577	0.157847	0.183023
16.68	0.206206	0.194029	0.16398	0.191394
16.69	0.205219	0.20564	0.157382	0.192488
16.7	0.187681	0.216328	0.159288	0.21543
16.71	0.214576	0.214702	0.171492	0.225018
16.72	0.184969	0.215178	0.157639	0.191307
16.73	0.19613	0.211878	0.155069	0.202765
16.74	0.173201	0.213464	0.181977	0.180849
16.75	0.179432	0.198452	0.161984	0.158404
16.76	0.184261	0.199122	0.185066	0.144402
16.77	0.193603	0.216533	0.187112	0.144964
16.78	0.196419	0.202192	0.176435	0.152878
16.79	0.224844	0.197556	0.174446	0.174303
16.8	0.222435	0.205859	0.169072	0.17934
16.81	0.203283	0.199816	0.176388	0.184551
16.82	0.216008	0.183056	0.163719	0.191445
16.83	0.185304	0.186806	0.163622	0.181873
16.84	0.184819	0.184679	0.159867	0.202099
16.85	0.186355	0.182254	0.159125	0.177598
16.86	0.170903	0.170665	0.164341	0.178257
16.87	0.171375	0.166198	0.165195	0.17041
16.88	0.187964	0.169208	0.16609	0.166766
16.89	0.164702	0.173829	0.160527	0.18971
16.9	0.182744	0.182091	0.163497	0.169254
16.91	0.182645	0.184995	0.176722	0.175469
16.92	0.182835	0.187472	0.167139	0.161907
16.93	0.168979	0.16679	0.157968	0.148548
16.94	0.178419	0.164491	0.163546	0.158341
16.95	0.17778	0.159042	0.163959	0.17643
16.96	0.184318	0.171531	0.172465	0.159563
16.97	0.191946	0.158487	0.170733	0.151116
16.98	0.185115	0.151872	0.176805	0.148765
16.99	0.186754	0.152166	0.185633	0.140409
17	0.185604	0.155701	0.169783	0.137026
17.01	0.174905	0.159147	0.166853	0.140354
17.02	0.186452	0.175615	0.162769	0.160903
17.03	0.196711	0.182593	0.164419	0.162811
17.04	0.167575	0.184163	0.170216	0.16542
17.05	0.187386	0.175621	0.160949	0.190082
17.06	0.183271	0.173111	0.175286	0.169258
17.07	0.174674	0.189753	0.164483	0.178579
17.08	0.171545	0.1762	0.157367	0.174239
17.09	0.178491	0.171032	0.178012	0.185113
17.1	0.167925	0.167388	0.1636	0.172759
17.11	0.164265	0.173553	0.170519	0.173254
17.12	0.16281	0.16903	0.157135	0.159104
17.13	0.178516	0.157073	0.162853	0.167456
17.14	0.185617	0.167864	0.164832	0.165984
17.15	0.183671	0.164935	0.162554	0.153134
17.16	0.176695	0.164176	0.15488	0.146346
17.17	0.171914	0.156975	0.161667	0.146889
17.18	0.163832	0.175695	0.173825	0.172613
17.19	0.153301	0.167748	0.174772	0.169023
17.2	0.178892	0.164125	0.162429	0.159764
17.21	0.167022	0.166868	0.16294	0.166091
17.22	0.174135	0.163763	0.167136	0.173925
17.23	0.185979	0.172198	0.183085	0.174464
17.24	0.182692	0.178561	0.169101	0.174454
17.25	0.192708	0.184516	0.18546	0.151251
17.26	0.188787	0.170767	0.187102	0.175859
17.27	0.18014	0.174069	0.199218	0.190718
17.28	0.170135	0.166937	0.182588	0.18636
17.29	0.183248	0.179844	0.193784	0.160221
17.3	0.160801	0.177649	0.184554	0.146254
17.31	0.170914	0.163552	0.181229	0.163672
17.32	0.190956	0.165283	0.187297	0.170362
17.33	0.187739	0.175667	0.200022	0.176535
17.34	0.201165	0.178487	0.18605	0.155019
17.35	0.198952	0.176703	0.190392	0.168192
17.36	0.198224	0.181219	0.185654	0.170843
17.37	0.189592	0.180778	0.19231	0.163513
17.38	0.19457	0.16671	0.182917	0.185444
17.39	0.167225	0.167685	0.178332	0.192983
17.4	0.178493	0.161389	0.17819	0.181295
17.41	0.193005	0.171971	0.170154	0.179585
17.42	0.188642	0.170662	0.164982	0.184882
17.43	0.17985	0.170512	0.176299	0.166
17.44	0.196755	0.180319	0.174838	0.191797
17.45	0.185675	0.179658	0.187343	0.169196
17.46	0.197254	0.189658	0.184194	0.160622
17.47	0.195243	0.183682	0.181969	0.175183
17.48	0.174038	0.187829	0.183899	0.150749
17.49	0.187498	0.197275	0.186929	0.157195
17.5	0.17671	0.188139	0.174334	0.165646
17.51	0.198535	0.199755	0.170366	0.171201
17.52	0.197271	0.190691	0.177067	0.156938
17.53	0.196717	0.180328	0.20073	0.151711
17.54	0.179645	0.180183	0.183857	0.152128
17.55	0.192346	0.171974	0.179202	0.162897
17.56	0.201125	0.167071	0.176506	0.149008
17.57	0.185984	0.173545	0.168006	0.171857
17.58	0.174887	0.162071	0.175802	0.156936
17.59	0.187604	0.163737	0.177409	0.154421
17.6	0.193067	0.166288	0.183956	0.163034
17.61	0.201864	0.159719	0.185338	0.156453
17.62	0.18021	0.1632	0.176168	0.16014
17.63	0.182112	0.156202	0.181621	0.147735
17.64	0.185826	0.155576	0.18631	0.171582
17.65	0.213564	0.160334	0.191787	0.168207
17.66	0.196909	0.171066	0.187005	0.179252
17.67	0.194588	0.167988	0.185885	0.171741
17.68	0.208468	0.16136	0.178667	0.182779
17.69	0.20693	0.172642	0.18626	0.170413
17.7	0.199228	0.166346	0.190253	0.177722
17.71	0.184342	0.167405	0.187729	0.160093
17.72	0.185894	0.166702	0.183471	0.153441
17.73	0.201219	0.178193	0.186617	0.167122
17.74	0.199087	0.17631	0.188953	0.177793
17.75	0.209652	0.180459	0.188156	0.190881
17.76	0.208544	0.180015	0.196742	0.169587
17.77	0.198855	0.180358	0.183697	0.171286
17.78	0.176077	0.173038	0.178684	0.17042
17.79	0.192888	0.175196	0.175128	0.175291
17.8	0.199274	0.162382	0.189693	0.184929
17.81	0.188486	0.167215	0.161253	0.170654
17.82	0.209063	0.171385	0.166434	0.16999
17.83	0.208923	0.1732	0.183074	0.159112
17.84	0.201954	0.162057	0.184885	0.149271
17.85	0.192894	0.170115	0.165723	0.162248
17.86	0.194998	0.181236	0.163311	0.162403
17.87	0.202207	0.165137	0.162785	0.165782
17.88	0.183305	0.161295	0.161288	0.155528
17.89	0.192538	0.169901	0.165517	0.144009
17.9	0.202922	0.167557	0.157252	0.147549
17.91	0.196051	0.162811	0.171055	0.166507
17.92	0.21125	0.158663	0.162224	0.155905
17.93	0.204801	0.167766	0.158854	0.156599
17.94	0.204629	0.178492	0.165729	0.156784
17.95	0.215175	0.182652	0.17862	0.146395
17.96	0.209072	0.188285	0.159934	0.157304
17.97	0.200537	0.176728	0.159973	0.169144
17.98	0.193703	0.17053	0.168872	0.172816
17.99	0.187056	0.179908	0.158035	0.165686
18	0.183261	0.178374	0.156037	0.153186
18.01	0.181609	0.187064	0.150195	0.138706
18.02	0.177762	0.190693	0.165046	0.142523
18.03	0.194154	0.199594	0.171197	0.145455
18.04	0.189124	0.197152	0.157984	0.140749
18.05	0.185403	0.212803	0.152539	0.130364
18.06	0.187278	0.206469	0.163459	0.139802
18.07	0.187647	0.223324	0.180996	0.143434
18.08	0.186925	0.221161	0.178626	0.151361
18.09	0.190729	0.229825	0.173298	0.154147
18.1	0.195941	0.21554	0.178327	0.15455
18.11	0.185297	0.208279	0.177878	0.144666
18.12	0.177576	0.209366	0.176577	0.152511
18.13	0.185852	0.193045	0.16379	0.140603
18.14	0.178019	0.195478	0.167243	0.159577
18.15	0.185578	0.197056	0.186013	0.17061
18.16	0.188842	0.204967	0.16449	0.150341
18.17	0.195077	0.2083	0.170023	0.155472
18.18	0.190219	0.19975	0.164585	0.153851
18.19	0.184448	0.21796	0.16478	0.149389
18.2	0.184506	0.21215	0.161081	0.140431
18.21	0.208678	0.206237	0.161552	0.154426
18.22	0.217011	0.197972	0.163443	0.153036
18.23	0.211314	0.201624	0.160618	0.159756
18.24	0.206584	0.218638	0.162172	0.155132
18.25	0.195923	0.201734	0.163454	0.148952
18.26	0.192779	0.19025	0.164384	0.14927
18.27	0.191387	0.202702	0.16767	0.14762
18.28	0.203772	0.195955	0.170457	0.152222
18.29	0.210208	0.195797	0.171358	0.135968
18.3	0.186041	0.1974	0.190383	0.146549
18.31	0.189629	0.182237	0.202562	0.145897
18.32	0.18433	0.177337	0.212601	0.136283
18.33	0.192699	0.177959	0.199268	0.153155
18.34	0.1937	0.164568	0.201682	0.139436
18.35	0.217428	0.186042	0.195382	0.148018
18.36	0.211012	0.178246	0.186489	0.142028
18.37	0.193035	0.169087	0.195058	0.152509
18.38	0.191499	0.169899	0.189201	0.148427
18.39	0.207522	0.162443	0.213801	0.142811
18.4	0.193831	0.175406	0.203591	0.140059
18.41	0.186793	0.195584	0.18993	0.136385
18.42	0.176038	0.179835	0.182401	0.155344
18.43	0.17703	0.173856	0.173949	0.142773
18.44	0.188214	0.170836	0.199781	0.153912
18.45	0.180336	0.171614	0.191696	0.148399
18.46	0.179262	0.169417	0.197874	0.156486
18.47	0.186223	0.176717	0.187631	0.156329
18.48	0.180111	0.176718	0.178365	0.160064
18.49	0.175565	0.17127	0.186664	0.161723
18.5	0.178459	0.179708	0.19573	0.152097
18.51	0.181684	0.203529	0.184478	0.168694
18.52	0.182959	0.189551	0.187538	0.171443
18.53	0.183243	0.178425	0.18904	0.175959
18.54	0.175673	0.17833	0.187661	0.157867
18.55	0.168538	0.162772	0.187228	0.177388
18.56	0.160066	0.168496	0.175734	0.168874
18.57	0.165903	0.191166	0.180112	0.166487
18.58	0.165338	0.194386	0.173541	0.173934
18.59	0.184446	0.21243	0.172227	0.18738
18.6	0.167282	0.199609	0.162401	0.193382
18.61	0.165036	0.195304	0.169672	0.181893
18.62	0.173594	0.198808	0.171337	0.186284
18.63	0.178952	0.207412	0.181716	0.182547
18.64	0.181459	0.205694	0.1786	0.162378
18.65	0.188541	0.186781	0.172761	0.180308
18.66	0.190661	0.193217	0.185522	0.178499
18.67	0.172694	0.17213	0.163733	0.198957
18.68	0.173802	0.177819	0.16851	0.204283
18.69	0.175062	0.187018	0.171467	0.198112
18.7	0.179619	0.192111	0.194144	0.199793
18.71	0.174149	0.172072	0.177316	0.211671
18.72	0.178997	0.167644	0.175686	0.23113
18.73	0.176802	0.179795	0.164528	0.210256
18.74	0.169123	0.188282	0.162921	0.2135
18.75	0.173182	0.174055	0.160209	0.213716
18.76	0.165909	0.181576	0.164729	0.208869
18.77	0.176321	0.186883	0.16119	0.196946
18.78	0.174178	0.173936	0.170902	0.200455
18.79	0.172661	0.176987	0.180784	0.195692
18.8	0.187751	0.183848	0.18019	0.166652
18.81	0.176796	0.178855	0.198761	0.169144
18.82	0.178105	0.172396	0.190435	0.187109
18.83	0.177503	0.176367	0.200182	0.186185
18.84	0.183716	0.174167	0.194262	0.18197
18.85	0.163449	0.167892	0.211757	0.196886
18.86	0.164961	0.163735	0.197162	0.168939
18.87	0.163273	0.158343	0.204797	0.180897
18.88	0.16936	0.159513	0.202461	0.170418
18.89	0.180703	0.170709	0.207456	0.166055
18.9	0.17596	0.173023	0.208673	0.178758
18.91	0.186594	0.162848	0.207199	0.170573
18.92	0.190287	0.173354	0.198374	0.178797
18.93	0.174956	0.173848	0.195175	0.156084
18.94	0.193772	0.163706	0.215751	0.160394
18.95	0.173038	0.151548	0.19412	0.15764
18.96	0.18316	0.173927	0.185932	0.148374
18.97	0.173957	0.169101	0.194468	0.15169
18.98	0.18297	0.179577	0.204934	0.166305
18.99	0.190936	0.182674	0.216003	0.166089
19	0.182477	0.167862	0.216073	0.165946
19.01	0.197664	0.166116	0.206272	0.171362
19.02	0.198491	0.162068	0.217416	0.155753
19.03	0.219982	0.17542	0.192514	0.151906
19.04	0.203206	0.175761	0.19004	0.165368
19.05	0.193975	0.171828	0.187434	0.149855
19.06	0.196694	0.17236	0.208887	0.142709
19.07	0.200847	0.173989	0.214993	0.140572
19.08	0.189526	0.18495	0.210728	0.140493
19.09	0.181454	0.189269	0.185438	0.142979
19.1	0.194843	0.192059	0.201753	0.145896
19.11	0.199409	0.187328	0.192146	0.148748
19.12	0.203655	0.20304	0.198686	0.159573
19.13	0.184242	0.178745	0.203614	0.163303
19.14	0.186409	0.209589	0.214582	0.155918
19.15	0.186754	0.206155	0.208598	0.1479
19.16	0.186731	0.196489	0.213799	0.158101
19.17	0.200733	0.185696	0.204996	0.165017
19.18	0.191647	0.190892	0.205249	0.157868
19.19	0.189642	0.185562	0.209309	0.157885
19.2	0.18346	0.171134	0.207612	0.150884
19.21	0.186194	0.163348	0.198262	0.141605
19.22	0.182605	0.175644	0.199535	0.145947
19.23	0.181492	0.175943	0.187443	0.161536
19.24	0.184636	0.165727	0.202989	0.14851
19.25	0.185256	0.166659	0.204109	0.156327
19.26	0.18923	0.195655	0.221197	0.167082
19.27	0.192299	0.189928	0.194406	0.154141
19.28	0.180541	0.204794	0.193695	0.157064
19.29	0.185565	0.203114	0.190481	0.145859
19.3	0.184908	0.201545	0.193464	0.151295
19.31	0.181688	0.230104	0.193233	0.149924
19.32	0.178962	0.197673	0.203392	0.147038
19.33	0.179579	0.205449	0.193437	0.150506
19.34	0.177774	0.18823	0.19883	0.14252
19.35	0.184352	0.193546	0.184947	0.155142
19.36	0.177772	0.176745	0.16546	0.162517
19.37	0.168321	0.174574	0.172398	0.159282
19.38	0.169087	0.156097	0.180939	0.173211
19.39	0.175287	0.161221	0.197177	0.17865
19.4	0.1791	0.173736	0.188457	0.17511
19.41	0.165512	0.156489	0.206764	0.181873
19.42	0.179625	0.166805	0.205633	0.159212
19.43	0.181921	0.165189	0.21577	0.168793
19.44	0.180399	0.16923	0.22475	0.166282
19.45	0.178329	0.167545	0.205165	0.177053
19.46	0.17256	0.182448	0.213612	0.160356
19.47	0.160624	0.162141	0.218902	0.173287
19.48	0.166244	0.187419	0.208619	0.176132
19.49	0.176866	0.165247	0.199019	0.157128
19.5	0.172294	0.15697	0.20919	0.163437
19.51	0.175247	0.167034	0.200571	0.159915
19.52	0.172844	0.195092	0.209719	0.155818
19.53	0.168616	0.196573	0.221893	0.168502
19.54	0.1701	0.188157	0.223167	0.166065
19.55	0.163927	0.164002	0.220115	0.161163
19.56	0.169559	0.180667	0.207486	0.170847
19.57	0.180559	0.193426	0.174876	0.179113
19.58	0.171279	0.181778	0.17914	0.173693
19.59	0.164234	0.165955	0.176869	0.170045
19.6	0.158047	0.156053	0.188753	0.173959
19.61	0.164306	0.177671	0.171357	0.155509
19.62	0.156062	0.18075	0.170729	0.14867
19.63	0.175626	0.177758	0.167176	0.150059
19.64	0.180437	0.170086	0.169037	0.154738
19.65	0.175938	0.147156	0.170087	0.165479
19.66	0.172399	0.144763	0.162916	0.161575
19.67	0.182921	0.158309	0.17034	0.159875
19.68	0.180816	0.151069	0.160753	0.168041
19.69	0.190868	0.159985	0.17475	0.175766
19.7	0.19106	0.175369	0.180818	0.170665
19.71	0.170415	0.181694	0.173134	0.158079
19.72	0.165518	0.187641	0.16945	0.155529
19.73	0.175162	0.18048	0.14817	0.156519
19.74	0.18582	0.182884	0.142565	0.198892
19.75	0.184112	0.184094	0.158803	0.174229
19.76	0.182496	0.176425	0.166066	0.194107
19.77	0.181256	0.170297	0.164419	0.18719
19.78	0.174387	0.184824	0.156278	0.171503
19.79	0.181021	0.189706	0.138716	0.174339
19.8	0.189607	0.197288	0.153284	0.181326
19.81	0.198756	0.192143	0.139636	0.175133
19.82	0.186607	0.200551	0.148322	0.193818
19.83	0.177887	0.207827	0.153111	0.182637
19.84	0.175295	0.217279	0.146807	0.182526
19.85	0.172335	0.208683	0.166611	0.184327
19.86	0.194608	0.213526	0.145012	0.176443
19.87	0.187059	0.22244	0.139305	0.163436
19.88	0.176554	0.226406	0.149564	0.163785
19.89	0.180825	0.209145	0.151977	0.155739
19.9	0.175296	0.229396	0.155652	0.144625
19.91	0.17485	0.246341	0.155306	0.154386
19.92	0.184806	0.245178	0.147305	0.146451
19.93	0.174984	0.232031	0.147195	0.138278
19.94	0.164971	0.257687	0.148953	0.144232
19.95	0.175341	0.245853	0.153407	0.141486
19.96	0.176323	0.224362	0.154192	0.136345
19.97	0.185327	0.227211	0.15677	0.140329
19.98	0.175871	0.232581	0.151928	0.142254
[truncated: 8,003 more rows]

## Sheet: rg
Alpha-Mangostin	0	2.19966	1.68598	2.0543	1.61691	Atazanavir	0	2.20608	1.68929	2.05244	1.6332	Birinapant	0	2.19652	1.68251	2.04944	1.61813	Lopinavir	0	2.19759	1.68292	2.05114	1.61845
	10	2.21423	1.69792	2.06737	1.62747		10	2.23443	1.7094	2.08404	1.64927		10	2.21896	1.69652	2.0767	1.62994		10	2.21414	1.69817	2.07105	1.62228
	20	2.21496	1.71175	2.0654	1.61744		20	2.23587	1.70587	2.08835	1.65137		20	2.21622	1.68926	2.07436	1.63299		20	2.24385	1.7255	2.09729	1.64125
	30	2.22594	1.73216	2.06956	1.62053		30	2.22225	1.69624	2.07613	1.63989		30	2.22802	1.71421	2.09457	1.61319		30	2.23207	1.70948	2.08025	1.64757
	40	2.22693	1.72655	2.07021	1.62841		40	2.22752	1.71135	2.0727	1.64284		40	2.2222	1.72442	2.082	1.6025		40	2.20275	1.69869	2.04731	1.62087
	50	2.22991	1.73702	2.07739	1.61623		50	2.2295	1.70078	2.07263	1.65917		50	2.22048	1.73092	2.07885	1.59481		50	2.22048	1.70449	2.07172	1.6321
	60	2.21568	1.71708	2.06503	1.61425		60	2.24168	1.69831	2.08623	1.67738		60	2.23037	1.74294	2.0865	1.5993		60	2.21223	1.70545	2.06436	1.61795
	70	2.22382	1.70465	2.07321	1.63913		70	2.22532	1.676	2.06016	1.68845		70	2.22382	1.75977	2.06933	1.58489		70	2.21735	1.69886	2.07161	1.62959
	80	2.23809	1.71563	2.09156	1.64318		80	2.2328	1.68366	2.07223	1.68581		80	2.21993	1.76638	2.05516	1.58504		80	2.2271	1.70847	2.0839	1.63048
	90	2.22046	1.71701	2.07473	1.61501		90	2.21931	1.67059	2.06489	1.67215		90	2.21344	1.77694	2.03975	1.57498		90	2.21978	1.71125	2.07174	1.62309
	100	2.21176	1.7086	2.06706	1.60989		100	2.22428	1.68508	2.0644	1.6714		100	2.22161	1.78126	2.04768	1.58278		100	2.21093	1.70909	2.06446	1.6104
	110	2.2228	1.72992	2.07394	1.60868		110	2.23008	1.66463	2.07097	1.699		110	2.21115	1.77864	2.03401	1.57405		110	2.21813	1.7222	2.07067	1.60827
	120	2.21895	1.72182	2.07121	1.61025		120	2.22611	1.66343	2.07336	1.6868		120	2.22918	1.78696	2.04448	1.60168		120	2.21157	1.71608	2.06604	1.6027
	130	2.2243	1.73364	2.07381	1.60898		130	2.2244	1.66664	2.05948	1.6961		130	2.20985	1.77658	2.01778	1.59348		130	2.20818	1.73016	2.05927	1.58686
	140	2.23317	1.73769	2.08248	1.61796		140	2.21893	1.65182	2.05212	1.70518		140	2.21714	1.80103	2.01327	1.59199		140	2.20759	1.74015	2.05377	1.58141
	150	2.22937	1.73953	2.07566	1.61425		150	2.21272	1.62896	2.0513	1.712		150	2.2269	1.81046	2.02908	1.58846		150	2.21913	1.74245	2.07119	1.58844
	160	2.21793	1.71315	2.06207	1.62831		160	2.23127	1.66015	2.06584	1.71272		160	2.23576	1.81248	2.03259	1.60645		160	2.21366	1.72548	2.06708	1.59701
	170	2.21825	1.69775	2.06811	1.63764		170	2.23358	1.67183	2.0706	1.70159		170	2.24955	1.84349	2.05276	1.58388		170	2.22156	1.74824	2.07025	1.5901
	180	2.22854	1.68955	2.07235	1.66841		180	2.23462	1.65849	2.078	1.70833		180	2.22361	1.82075	2.01908	1.58022		180	2.21665	1.75487	2.06159	1.58029
	190	2.22619	1.66285	2.06863	1.69337		190	2.23197	1.68671	2.07192	1.68093		190	2.22872	1.79891	2.02743	1.60869		190	2.21854	1.74208	2.06966	1.58919
	200	2.22502	1.65868	2.06449	1.69944		200	2.23502	1.68795	2.07718	1.68132		200	2.23287	1.80717	2.01832	1.62231		200	2.22516	1.76468	2.07453	1.57635
	210	2.22488	1.65122	2.06213	1.70917		210	2.21683	1.67023	2.05015	1.68401		210	2.24022	1.81023	2.02658	1.62888		210	2.21952	1.77356	2.06347	1.56496
	220	2.22344	1.6635	2.05892	1.69734		220	2.22971	1.66031	2.07162	1.70146		220	2.23692	1.8088	2.02082	1.62854		220	2.22459	1.79002	2.0719	1.54941
	230	2.22608	1.68574	2.05207	1.69059		230	2.24533	1.66772	2.086	1.71764		230	2.22418	1.79847	1.99689	1.63459		230	2.21535	1.78931	2.06071	1.53864
	240	2.22513	1.68351	2.05283	1.68942		240	2.24492	1.66952	2.08606	1.71476		240	2.22802	1.82293	2.00756	1.60461		240	2.2158	1.78046	2.05979	1.55138
	250	2.21189	1.67467	2.03022	1.69076		250	2.24392	1.66296	2.08892	1.71504		250	2.22645	1.81227	2.00581	1.61449		250	2.20869	1.78878	2.05358	1.52961
	260	2.22948	1.68575	2.05024	1.70174		260	2.23848	1.6637	2.08526	1.70452		260	2.22554	1.81843	2.00761	1.60277		260	2.21283	1.7872	2.06254	1.53136
	270	2.22819	1.71272	2.03599	1.6885		270	2.23414	1.65137	2.08064	1.71076		270	2.2294	1.82094	2.02127	1.59344		270	2.21593	1.77631	2.05818	1.5586
	280	2.23131	1.72449	2.04559	1.67308		280	2.23512	1.66923	2.07238	1.70599		280	2.23398	1.83662	2.02048	1.5893		280	2.22832	1.77381	2.07355	1.57634
	290	2.2144	1.70706	2.02682	1.66887		290	2.22867	1.65607	2.06558	1.7102		290	2.24637	1.85106	2.03509	1.58881		290	2.23018	1.77266	2.07463	1.58145
	300	2.21547	1.72439	2.02433	1.65686		300	2.23235	1.64957	2.07513	1.7145		300	2.24309	1.84876	2.03735	1.57929		300	2.22382	1.73603	2.0681	1.61242
	310	2.22066	1.74504	2.02769	1.64499		310	2.21229	1.64712	2.05235	1.69214		310	2.24481	1.85799	2.02087	1.59446		310	2.2336	1.72653	2.08166	1.63208
	320	2.23755	1.75148	2.05387	1.65144		320	2.21727	1.64212	2.06209	1.69818		320	2.25017	1.85558	2.02097	1.61217		320	2.23283	1.75246	2.07329	1.6129
	330	2.24527	1.75816	2.0551	1.6637		330	2.22233	1.65743	2.067	1.69054		330	2.23397	1.85995	1.98959	1.60105		330	2.21873	1.73914	2.05932	1.60628
	340	2.23631	1.76572	2.04965	1.6381		340	2.21313	1.64906	2.0591	1.68422		340	2.24644	1.86836	2.00946	1.60134		340	2.22171	1.73943	2.0597	1.61368
	350	2.23412	1.76506	2.04771	1.63523		350	2.22465	1.6751	2.07217	1.6728		350	2.23724	1.85296	2.00502	1.59903		350	2.22301	1.76254	2.06066	1.5908
	360	2.21643	1.76695	2.01656	1.62374		360	2.23106	1.67178	2.08149	1.68159		360	2.2388	1.85688	1.99954	1.60568		360	2.22136	1.7491	2.06358	1.59725
	370	2.23043	1.77552	2.03054	1.63527		370	2.2201	1.65604	2.07079	1.68139		370	2.24654	1.85825	2.00255	1.6219		370	2.23756	1.7397	2.0896	1.61876
	380	2.21683	1.76054	2.0107	1.63897		380	2.21955	1.66858	2.06602	1.67338		380	2.23012	1.84233	1.98849	1.612		380	2.22689	1.75679	2.07178	1.59359
	390	2.22617	1.75855	2.0302	1.6424		390	2.22248	1.63834	2.07692	1.69736		390	2.23618	1.84404	1.99885	1.61403		390	2.20865	1.74632	2.04861	1.58426
	400	2.22381	1.75217	2.03335	1.63893		400	2.23589	1.63915	2.09114	1.71427		400	2.23248	1.8457	1.99526	1.60632		400	2.22222	1.77184	2.06245	1.57588
	410	2.22011	1.73695	2.02453	1.65592		410	2.23176	1.62808	2.08941	1.71617		410	2.24253	1.8487	2.00912	1.61358		410	2.22479	1.77191	2.0658	1.57866
	420	2.23346	1.73423	2.03929	1.67644		420	2.21729	1.63038	2.07294	1.69632		420	2.22827	1.83307	1.99854	1.60502		420	2.22404	1.75974	2.07117	1.58312
	430	2.23457	1.73164	2.03861	1.6829		430	2.22735	1.62523	2.08115	1.71745		430	2.23859	1.8388	2.01215	1.61017		430	2.21085	1.77183	2.05891	1.5483
	440	2.22577	1.74033	2.02255	1.66994		440	2.22165	1.62464	2.0683	1.71877		440	2.23138	1.82275	2.00061	1.62273		440	2.20136	1.75178	2.0479	1.55864
	450	2.2374	1.75806	2.03524	1.66701		450	2.22548	1.64065	2.07583	1.70433		450	2.23332	1.82808	1.99136	1.63342		450	2.2168	1.76242	2.05506	1.58083
	460	2.23554	1.75093	2.03373	1.67136		460	2.22772	1.64797	2.07819	1.70022		460	2.22838	1.82003	1.97668	1.6467		460	2.22306	1.778	2.06039	1.574
	470	2.21812	1.71705	2.01491	1.68285		470	2.22893	1.66978	2.07718	1.68328		470	2.22	1.81227	1.9819	1.62621		470	2.22592	1.78621	2.06684	1.56431
	480	2.23402	1.71792	2.04136	1.69213		480	2.22146	1.66231	2.06636	1.68423		480	2.21935	1.80175	1.97795	1.64085		480	2.22435	1.77388	2.0672	1.57336
	490	2.22876	1.7449	2.03197	1.66168		490	2.20811	1.65075	2.05124	1.67896		490	2.22591	1.8112	1.97667	1.64975		490	2.21841	1.75105	2.06828	1.58074
	500	2.22574	1.7409	2.02334	1.66829		500	2.22185	1.69308	2.06191	1.6599		500	2.23249	1.81405	1.98071	1.65952		500	2.2183	1.73608	2.07077	1.59363
	510	2.22455	1.75987	2.01587	1.65421		510	2.20915	1.67256	2.04997	1.6616		510	2.21741	1.80059	1.9579	1.66082		510	2.2272	1.72882	2.07745	1.61747
	520	2.22324	1.76105	2.01801	1.64681		520	2.22953	1.68904	2.07095	1.6733		520	2.2271	1.7981	1.96953	1.67564		520	2.21528	1.73069	2.06077	1.60401
	530	2.22627	1.76959	2.01775	1.64616		530	2.22139	1.66983	2.0564	1.68879		530	2.20917	1.78783	1.9635	1.64597		530	2.2223	1.73872	2.06204	1.61308
	540	2.23317	1.78227	2.02723	1.63951		540	2.2141	1.68717	2.04512	1.66596		540	2.22799	1.80928	1.98097	1.6523		540	2.21317	1.75521	2.05251	1.582
	550	2.23702	1.78447	2.04253	1.62855		550	2.21056	1.67816	2.03762	1.67482		550	2.22935	1.79855	1.98269	1.66557		550	2.21851	1.74785	2.06756	1.58549
	560	2.22545	1.77977	2.02908	1.6188		560	2.22336	1.67799	2.04706	1.69723		560	2.21687	1.78332	1.97802	1.65415		560	2.20816	1.73904	2.05717	1.57978
	570	2.22722	1.78483	2.03696	1.60815		570	2.23006	1.65907	2.04685	1.73327		570	2.20691	1.78429	1.95275	1.6565		570	2.21653	1.72428	2.06654	1.60693
	580	2.23168	1.78637	2.04296	1.6112		580	2.21159	1.63604	2.02731	1.7308		580	2.21598	1.77245	1.97169	1.67093		580	2.21149	1.70371	2.06381	1.61846
	590	2.22963	1.78176	2.03721	1.61791		590	2.22471	1.65284	2.04733	1.72487		590	2.22523	1.78029	1.96973	1.68938		590	2.2153	1.69403	2.06732	1.63449
	600	2.21963	1.78479	2.0182	1.61086		600	2.22022	1.64419	2.04517	1.72414		600	2.21753	1.78078	1.96143	1.67825		600	2.22184	1.69629	2.07445	1.64084
	610	2.2164	1.78738	2.01763	1.59978		610	2.22456	1.66705	2.05372	1.7031		610	2.20785	1.76303	1.9599	1.67323		610	2.20623	1.67764	2.06167	1.63399
	620	2.23305	1.78895	2.03624	1.62062		620	2.23393	1.66761	2.06779	1.71004		620	2.22268	1.79079	1.97512	1.66511		620	2.21763	1.68194	2.07325	1.64574
	630	2.2333	1.77576	2.0383	1.63318		630	2.23606	1.66027	2.06964	1.72048		630	2.22511	1.79257	1.95888	1.68871		630	2.20546	1.67102	2.06152	1.63888
	640	2.22145	1.77422	2.01358	1.63319		640	2.23975	1.66772	2.07671	1.71432		640	2.21711	1.77743	1.95696	1.68587		640	2.20663	1.67135	2.06009	1.64347
	650	2.236	1.79103	2.0324	1.63124		650	2.22572	1.65783	2.06445	1.70215		650	2.21785	1.79473	1.94763	1.6803		650	2.19937	1.67327	2.0473	1.63803
	660	2.23	1.76929	2.03891	1.63043		660	2.21685	1.65263	2.05745	1.6925		660	2.21232	1.78178	1.94247	1.68547		660	2.21615	1.67138	2.06675	1.66062
	670	2.2356	1.76839	2.04823	1.63503		670	2.2284	1.6786	2.07547	1.67518		670	2.22179	1.7876	1.94987	1.69564		670	2.21918	1.67034	2.06555	1.67124
	680	2.22906	1.75931	2.0495	1.62535		680	2.21794	1.66205	2.06172	1.6809		680	2.21222	1.76856	1.93637	1.70602		680	2.20607	1.65559	2.05656	1.66225
	690	2.22705	1.74163	2.05011	1.63808		690	2.21491	1.6555	2.06001	1.68147		690	2.21782	1.74335	1.9515	1.72911		690	2.21746	1.66504	2.06633	1.67098
	700	2.21972	1.73494	2.04803	1.62785		700	2.21451	1.63533	2.06138	1.69837		700	2.22163	1.75769	1.94267	1.73431		700	2.22946	1.66012	2.07433	1.69767
	710	2.23065	1.73297	2.06424	1.63931		710	2.21751	1.61409	2.06512	1.72183		710	2.2136	1.74553	1.92775	1.7427		710	2.21827	1.65527	2.06285	1.68706
	720	2.22693	1.73694	2.05443	1.63732		720	2.22355	1.61973	2.07063	1.72549		720	2.22002	1.75192	1.93412	1.74556		720	2.21672	1.68268	2.06529	1.65253
	730	2.22648	1.72394	2.05054	1.65461		730	2.22783	1.60916	2.07141	1.74538		730	2.21675	1.76499	1.92564	1.73339		730	2.20825	1.69465	2.05252	1.63344
	740	2.23335	1.71856	2.06328	1.66286		740	2.21735	1.5988	2.06253	1.7387		740	2.20362	1.75289	1.90524	1.73474		740	2.21578	1.70699	2.06433	1.62607
	750	2.22479	1.72724	2.04674	1.65133		750	2.2251	1.58095	2.06657	1.76976		750	2.21196	1.75151	1.91812	1.74314		750	2.22268	1.71183	2.06691	1.63649
	760	2.22176	1.74565	2.04309	1.62816		760	2.22357	1.58443	2.05995	1.77052		760	2.21869	1.75063	1.92229	1.75651		760	2.20613	1.70599	2.04519	1.62504
	770	2.21973	1.73929	2.03723	1.63676		770	2.20667	1.572	2.0414	1.76076		770	2.21438	1.71531	1.9243	1.77813		770	2.21781	1.71728	2.05878	1.62781
	780	2.23054	1.74195	2.0461	1.6522		780	2.21982	1.57295	2.04999	1.78286		780	2.2088	1.73693	1.9101	1.75846		780	2.21722	1.71496	2.06008	1.62701
	790	2.22234	1.72933	2.03543	1.65651		790	2.21885	1.57279	2.04597	1.78521		790	2.21537	1.73162	1.91644	1.77326		790	2.21959	1.71336	2.06316	1.63123
	800	2.23168	1.75352	2.04253	1.64742		800	2.2129	1.56721	2.04322	1.77846		800	2.22413	1.74559	1.92388	1.77345		800	2.22143	1.72851	2.06447	1.61855
	810	2.22899	1.74453	2.03838	1.65483		810	2.21422	1.56119	2.05287	1.77594		810	2.21821	1.74218	1.92603	1.75958		810	2.21286	1.73584	2.05769	1.59572
	820	2.2401	1.754	2.0611	1.64666		820	2.2304	1.57508	2.07322	1.78052		820	2.2093	1.72167	1.91789	1.76624		820	2.21785	1.7431	2.06388	1.59365
	830	2.22479	1.74972	2.04081	1.63493		830	2.22522	1.55316	2.07243	1.78773		830	2.22132	1.736	1.91911	1.78098		830	2.22387	1.73934	2.07059	1.60578
	840	2.22384	1.7465	2.03855	1.63859		840	2.23371	1.57022	2.07877	1.78664		840	2.21823	1.72314	1.92328	1.78125		840	2.21593	1.72702	2.06869	1.59956
	850	2.23082	1.78018	2.04723	1.61026		850	2.22464	1.56783	2.07006	1.77617		850	2.21577	1.68458	1.93958	1.79428		850	2.22777	1.744	2.07644	1.60398
	860	2.23672	1.77422	2.05615	1.62179		860	2.22274	1.55158	2.07053	1.78511		860	2.22265	1.70798	1.9444	1.78396		860	2.23035	1.73798	2.07541	1.61895
	870	2.23154	1.75353	2.04959	1.63826		870	2.23397	1.54595	2.0827	1.80378		870	2.21608	1.70962	1.94613	1.76402		870	2.22407	1.72882	2.0702	1.61815
	880	2.23054	1.75356	2.04776	1.63777		880	2.2374	1.5363	2.08902	1.81321		880	2.22706	1.69285	1.96342	1.78851		880	2.22517	1.71337	2.07331	1.63354
	890	2.22062	1.73965	2.03584	1.6405		890	2.24264	1.53708	2.09846	1.81458		890	2.22226	1.68356	1.96397	1.78473		890	2.22423	1.72176	2.06696	1.63021
	900	2.22042	1.73287	2.0395	1.64261		900	2.23546	1.56427	2.08952	1.78369		900	2.20862	1.68677	1.95077	1.76218		900	2.21444	1.68996	2.05939	1.64635
	910	2.23472	1.74854	2.05983	1.6394		910	2.23485	1.55897	2.09023	1.78596		910	2.23077	1.70781	1.95202	1.79602		910	2.20485	1.67821	2.04976	1.64463
	920	2.25216	1.75574	2.08836	1.64335		920	2.2208	1.55853	2.07338	1.77087		920	2.22684	1.72341	1.94147	1.78276		920	2.20607	1.68139	2.04869	1.64599
	930	2.21986	1.74415	2.05047	1.61526		930	2.2109	1.57224	2.06607	1.7423		930	2.22681	1.74889	1.93825	1.76122		930	2.21715	1.71633	2.06388	1.62051
	940	2.22795	1.7589	2.05777	1.61227		940	2.21713	1.56937	2.07226	1.75332		940	2.2199	1.7403	1.9272	1.76441		940	2.20726	1.72308	2.05106	1.60256
	950	2.21957	1.74464	2.04774	1.61739		950	2.2291	1.56347	2.08509	1.77363		950	2.218	1.71695	1.9455	1.76242		950	2.22913	1.75903	2.07479	1.59344
	960	2.21884	1.73442	2.04886	1.62495		960	2.23614	1.56612	2.09073	1.78235		960	2.21579	1.70396	1.93917	1.77639		960	2.22649	1.74598	2.07322	1.60246
	970	2.22678	1.7511	2.05243	1.62428		970	2.23405	1.57044	2.09006	1.77407		970	2.21907	1.70404	1.93516	1.78884		970	2.21721	1.73763	2.06211	1.60012
	980	2.23082	1.75916	2.05421	1.62442		980	2.23614	1.58179	2.09252	1.76634		980	2.22126	1.70619	1.94667	1.77971		980	2.22509	1.74399	2.0669	1.60887
	990	2.23503	1.74797	2.05719	1.64416		990	2.25022	1.59121	2.10848	1.77463		990	2.22607	1.68335	1.9618	1.79678		990	2.23167	1.75202	2.06661	1.61872
	1000	2.2254	1.74049	2.04608	1.63983		1000	2.2383	1.57888	2.09433	1.77226		1000	2.23047	1.67612	1.97211	1.80317		1000	2.22847	1.7211	2.0589	1.65255
	1010	2.22573	1.73394	2.04783	1.64546		1010	2.23757	1.5757	2.09669	1.77044		1010	2.22973	1.67086	1.96393	1.8151		1010	2.2241	1.71939	2.05929	1.64202
	1020	2.23062	1.73769	2.05305	1.64827		1020	2.22804	1.5718	2.08194	1.76729		1020	2.22077	1.67745	1.94287	1.80972		1020	2.21329	1.68476	2.05056	1.65955
	1030	2.22597	1.72786	2.0486	1.65154		1030	2.2388	1.56622	2.09314	1.7861		1030	2.22453	1.67251	1.94779	1.8182		1030	2.22175	1.68515	2.0617	1.66793
	1040	2.22818	1.74496	2.05021	1.63749		1040	2.22912	1.55444	2.08713	1.77919		1040	2.21591	1.65568	1.95324	1.80668		1040	2.2242	1.71134	2.06479	1.6438
	1050	2.23617	1.75695	2.05713	1.63776		1050	2.22275	1.54239	2.07853	1.78382		1050	2.23208	1.66833	1.96849	1.81827		1050	2.2166	1.71434	2.04628	1.6433
	1060	2.23916	1.74586	2.0652	1.64761		1060	2.23175	1.56119	2.08854	1.77823		1060	2.2294	1.68106	1.96552	1.8031		1060	2.21654	1.71241	2.0495	1.64115
	1070	2.23845	1.75887	2.06132	1.63665		1070	2.22397	1.57817	2.08183	1.75142		1070	2.23588	1.70794	1.96067	1.79918		1070	2.22176	1.72236	2.05581	1.63694
	1080	2.2201	1.74577	2.04026	1.62706		1080	2.20971	1.56834	2.06408	1.74516		1080	2.22817	1.69331	1.96726	1.78665		1080	2.21866	1.7066	2.04593	1.65728
	1090	2.21716	1.75961	2.03794	1.6069		1090	2.2198	1.57841	2.07917	1.74377		1090	2.21711	1.69174	1.95668	1.77217		1090	2.2203	1.72605	2.03935	1.64963
	1100	2.22037	1.78838	2.04109	1.57977		1100	2.22337	1.59208	2.08616	1.73204		1100	2.22451	1.67797	1.96213	1.79759		1100	2.20781	1.72411	2.02014	1.64173
	1110	2.21439	1.78872	2.0368	1.5681		1110	2.21757	1.60237	2.0759	1.71998		1110	2.2175	1.67288	1.94456	1.80409		1110	2.21271	1.7349	2.03042	1.63087
	1120	2.22635	1.80937	2.0461	1.56619		1120	2.21747	1.59614	2.07539	1.72611		1120	2.21572	1.66466	1.94038	1.81182		1120	2.20954	1.72147	2.03307	1.63319
	1130	2.23377	1.809	2.04699	1.58644		1130	2.21424	1.58275	2.07387	1.73197		1130	2.22643	1.69003	1.9466	1.8079		1130	2.22279	1.73233	2.04114	1.64753
	1140	2.22143	1.81752	2.0364	1.55538		1140	2.22582	1.58698	2.08325	1.74645		1140	2.21274	1.68526	1.95074	1.77398		1140	2.22313	1.71792	2.04726	1.65594
	1150	2.23342	1.83162	2.05105	1.55393		1150	2.22639	1.59937	2.08411	1.73555		1150	2.22987	1.69669	1.97636	1.7776		1150	2.21074	1.69451	2.03803	1.65825
	1160	2.22775	1.80804	2.04687	1.5707		1160	2.22563	1.62064	2.08347	1.71451		1160	2.20723	1.68825	1.95175	1.75619		1160	2.22346	1.71392	2.05307	1.65375
	1170	2.2209	1.78963	2.03992	1.58138		1170	2.2259	1.626	2.08423	1.7092		1170	2.22	1.70144	1.9664	1.75932		1170	2.20962	1.71064	2.03666	1.64031
	1180	2.22654	1.78459	2.04672	1.5941		1180	2.21755	1.60401	2.07527	1.71916		1180	2.22863	1.74268	1.95334	1.75532		1180	2.21843	1.70524	2.04448	1.65987
	1190	2.222	1.79206	2.04482	1.57537		1190	2.21943	1.61102	2.0745	1.71836		1190	2.22151	1.73202	1.93321	1.77004		1190	2.21909	1.70886	2.03944	1.66409
	1200	2.22343	1.8059	2.03972	1.57021		1200	2.23076	1.61241	2.08318	1.73581		1200	2.21582	1.71332	1.92653	1.78121		1200	2.21315	1.6963	2.04014	1.66025
	1210	2.21986	1.80156	2.04072	1.56376		1210	2.2214	1.60886	2.07645	1.72312		1210	2.21298	1.74267	1.92419	1.74789		1210	2.21475	1.68865	2.04052	1.67182
	1220	2.22304	1.81227	2.04599	1.55352		1220	2.23199	1.62577	2.08499	1.72431		1220	2.22482	1.76104	1.92814	1.75517		1220	2.21474	1.6995	2.03897	1.66268
	1230	2.21882	1.80627	2.04255	1.55295		1230	2.22233	1.61739	2.06801	1.72769		1230	2.22631	1.77913	1.91946	1.75021		1230	2.20372	1.69769	2.01856	1.66013
	1240	2.2185	1.77963	2.04031	1.5854		1240	2.21899	1.58383	2.07014	1.74754		1240	2.21959	1.77576	1.89963	1.75821		1240	2.20986	1.70631	2.01883	1.66726
	1250	2.22382	1.79997	2.04288	1.57401		1250	2.2082	1.58364	2.05778	1.73492		1250	2.24674	1.79191	1.92113	1.7872		1250	2.21255	1.71333	2.02272	1.66249
	1260	2.22684	1.79343	2.04535	1.58676		1260	2.21412	1.58942	2.05752	1.74499		1260	2.22671	1.76177	1.90287	1.78654		1260	2.21661	1.72503	2.02513	1.65827
	1270	2.22868	1.79272	2.05014	1.58653		1270	2.21493	1.57474	2.06177	1.75533		1270	2.2355	1.76463	1.89359	1.81532		1270	2.21645	1.72726	2.02761	1.65249
	1280	2.23331	1.79038	2.05177	1.60006		1280	2.22161	1.58832	2.07189	1.74802		1280	2.2293	1.74953	1.88235	1.82632		1280	2.22362	1.74375	2.04243	1.63608
	1290	2.22471	1.7746	2.04709	1.59964		1290	2.20431	1.58642	2.0549	1.72588		1290	2.24527	1.74115	1.91873	1.83556		1290	2.22289	1.75276	2.03866	1.62915
	1300	2.22792	1.7656	2.0463	1.61942		1300	2.2244	1.61049	2.07733	1.72829		1300	2.22671	1.74138	1.89497	1.81471		1300	2.21128	1.73712	2.02517	1.63115
	1310	2.23686	1.78642	2.0508	1.61556		1310	2.21363	1.61775	2.06763	1.70533		1310	2.22446	1.74304	1.87905	1.82413		1310	2.2108	1.73339	2.02776	1.6306
	1320	2.22651	1.78993	2.04236	1.59363		1320	2.21854	1.61994	2.07652	1.70519		1320	2.215	1.74996	1.8388	1.83545		1320	2.20228	1.73694	2.00727	1.6291
	1330	2.23221	1.78456	2.04757	1.60882		1330	2.2092	1.6165	2.07115	1.69066		1330	2.2034	1.72658	1.83725	1.83122		1330	2.20535	1.7283	1.99722	1.65868
	1340	2.241	1.77377	2.05942	1.62993		1340	2.2109	1.62513	2.06899	1.68951		1340	2.21871	1.72607	1.87102	1.83448		1340	2.20747	1.74398	2.00046	1.64394
	1350	2.24643	1.78947	2.06556	1.61992		1350	2.20944	1.64085	2.0644	1.67603		1350	2.21267	1.73441	1.83131	1.852		1350	2.21459	1.76327	2.0025	1.64003
	1360	2.233	1.76566	2.04799	1.63119		1360	2.2218	1.65176	2.08307	1.6749		1360	2.22895	1.77124	1.82568	1.86174		1360	2.20639	1.7547	1.99784	1.63279
	1370	2.23222	1.79875	2.05037	1.58936		1370	2.22224	1.65546	2.08303	1.67246		1370	2.22296	1.76247	1.81259	1.86851		1370	2.20366	1.75002	2.00622	1.62011
	1380	2.23646	1.81141	2.05494	1.58099		1380	2.21879	1.66019	2.07492	1.66869		1380	2.21398	1.72924	1.8121	1.87868		1380	2.20692	1.76721	2.00735	1.6089
	1390	2.22554	1.81458	2.04666	1.5571		1390	2.23784	1.66972	2.09518	1.68467		1390	2.209	1.73658	1.78655	1.88465		1390	2.22449	1.77323	2.03337	1.61794
	1400	2.23347	1.81552	2.04815	1.57661		1400	2.21461	1.64459	2.07288	1.67557		1400	2.22422	1.75714	1.79268	1.89554		1400	2.21526	1.77911	2.01548	1.60852
	1410	2.23398	1.81389	2.04908	1.57874		1410	2.21607	1.65618	2.06505	1.67767		1410	2.21645	1.75848	1.79989	1.86908		1410	2.20203	1.75417	1.99983	1.6191
	1420	2.22706	1.79242	2.047	1.5864		1420	2.21698	1.67334	2.06558	1.66233		1420	2.20752	1.74147	1.81401	1.85012		1420	2.19551	1.75041	1.99404	1.61257
	1430	2.22661	1.77712	2.0474	1.60173		1430	2.21077	1.68627	2.05639	1.644		1430	2.20319	1.71867	1.82466	1.85064		1430	2.2055	1.7692	2.00134	1.61028
	1440	2.21872	1.77663	2.04461	1.58384		1440	2.21142	1.68453	2.05074	1.65457		1440	2.20904	1.73564	1.83185	1.84163		1440	2.20583	1.76458	2.00466	1.61213
	1450	2.22134	1.76973	2.04423	1.59935		1450	2.22582	1.6805	2.06915	1.67426		1450	2.22601	1.72642	1.86383	1.85899		1450	2.20521	1.75829	2.00804	1.6131
	1460	2.22479	1.76571	2.04847	1.60791		1460	2.22776	1.68939	2.0725	1.66629		1460	2.21961	1.72063	1.86817	1.84463		1460	2.21333	1.76093	2.01753	1.62059
	1470	2.22733	1.76365	2.0459	1.62045		1470	2.2174	1.68148	2.05782	1.66486		1470	2.21601	1.70955	1.86952	1.84491		1470	2.20398	1.75117	2.01185	1.61274
	1480	2.2437	1.778	2.06261	1.62873		1480	2.22548	1.70742	2.06122	1.65578		1480	2.21507	1.70213	1.87681	1.84211		1480	2.20865	1.7493	2.0221	1.61471
	1490	2.23714	1.78113	2.05157	1.62117		1490	2.22833	1.716	2.06509	1.64973		1490	2.22912	1.72112	1.88574	1.84923		1490	2.20946	1.74943	2.01453	1.62622
	1500	2.23745	1.77866	2.05564	1.6196		1500	2.22402	1.72086	2.06022	1.6391		1500	2.21356	1.71502	1.87323	1.83013		1500	2.22098	1.76936	2.03213	1.61411
	1510	2.22347	1.76985	2.04033	1.61005		1510	2.21615	1.72347	2.04546	1.63353		1510	2.2074	1.71889	1.84991	1.83534		1510	2.21116	1.72704	2.02784	1.6382
	1520	2.23446	1.77586	2.05205	1.61898		1520	2.22302	1.71397	2.05549	1.64952		1520	2.21577	1.72347	1.84006	1.86095		1520	2.19389	1.73035	2.00705	1.61367
	1530	2.23207	1.79255	2.04519	1.60256		1530	2.22831	1.71215	2.06263	1.65675		1530	2.22207	1.73171	1.83683	1.87147		1530	2.20143	1.73359	2.01868	1.61622
	1540	2.2286	1.78438	2.04645	1.60044		1540	2.23699	1.70932	2.07151	1.67191		1540	2.21628	1.71554	1.84306	1.86651		1540	2.20373	1.73379	2.03149	1.6062
	1550	2.23219	1.78356	2.04276	1.61598		1550	2.2368	1.67977	2.06978	1.70321		1550	2.21067	1.69888	1.8579	1.85368		1550	2.21041	1.75362	2.03601	1.59728
	1560	2.24012	1.78776	2.05397	1.61909		1560	2.22393	1.65609	2.06209	1.70202		1560	2.21329	1.70766	1.86427	1.84547		1560	2.21591	1.75749	2.04529	1.59641
	1570	2.2296	1.79437	2.04526	1.59355		1570	2.23452	1.67244	2.07232	1.70134		1570	2.214	1.71942	1.85252	1.84807		1570	2.21685	1.78114	2.04448	1.57369
	1580	2.23855	1.80337	2.05431	1.59683		1580	2.23046	1.67661	2.06262	1.69838		1580	2.21393	1.74187	1.825	1.85424		1580	2.21569	1.76975	2.04751	1.57931
	1590	2.23103	1.77548	2.05358	1.60794		1590	2.22756	1.66459	2.06272	1.70246		1590	2.2021	1.76071	1.79146	1.84094		1590	2.20691	1.77127	2.0428	1.55898
	1600	2.22784	1.77838	2.0473	1.60389		1600	2.23151	1.65075	2.06216	1.7268		1600	2.20755	1.77089	1.80173	1.83419		1600	2.20926	1.77096	2.04823	1.55889
	1610	2.22198	1.74866	2.03477	1.63595		1610	2.24626	1.66432	2.07626	1.73509		1610	2.21473	1.77067	1.80979	1.84376		1610	2.21309	1.76943	2.03994	1.58218
	1620	2.22846	1.73408	2.03967	1.66276		1620	2.23453	1.67604	2.0574	1.71589		1620	2.22131	1.81163	1.79063	1.8385		1620	2.20353	1.78296	2.02799	1.55544
	1630	2.22306	1.72162	2.02935	1.67384		1630	2.24165	1.6653	2.07028	1.72936		1630	2.21992	1.82573	1.77653	1.83486		1630	2.20203	1.76922	2.03581	1.55668
	1640	2.23383	1.73084	2.04555	1.6733		1640	2.24028	1.68303	2.07662	1.70083		1640	2.2093	1.82601	1.756	1.8287		1640	2.20162	1.77002	2.03899	1.55044
	1650	2.23989	1.75747	2.04895	1.65751		1650	2.24026	1.67765	2.07295	1.71053		1650	2.22018	1.82624	1.76014	1.85072		1650	2.20355	1.78693	2.0333	1.54398
	1660	2.24592	1.7537	2.06267	1.66079		1660	2.23233	1.65894	2.05577	1.72868		1660	2.19847	1.81821	1.72896	1.83612		1660	2.19542	1.76572	2.02082	1.5615
	1670	2.21928	1.74202	2.0303	1.64125		1670	2.23686	1.66899	2.06046	1.72514		1670	2.21114	1.84436	1.73224	1.83738		1670	2.19204	1.75509	2.03391	1.54692
	1680	2.22923	1.76641	2.03781	1.63283		1680	2.24511	1.66254	2.06691	1.74497		1680	2.21107	1.83128	1.75472	1.82894		1680	2.20568	1.76236	2.05166	1.55397
	1690	2.22503	1.74761	2.03909	1.63997		1690	2.23894	1.65388	2.05739	1.74859		1690	2.21694	1.83024	1.76718	1.8322		1690	2.20444	1.75548	2.04942	1.5612
	1700	2.24169	1.77802	2.05813	1.62883		1700	2.23882	1.64569	2.05341	1.76064		1700	2.21907	1.84849	1.75049	1.83506		1700	2.20144	1.75021	2.04059	1.57016
	1710	2.22722	1.76782	2.04	1.62304		1710	2.24106	1.64524	2.05913	1.76008		1710	2.21584	1.86272	1.74081	1.82201		1710	2.20624	1.75135	2.04375	1.57824
	1720	2.23511	1.78271	2.05199	1.6133		1720	2.23979	1.66005	2.05486	1.74786		1720	2.22034	1.87098	1.74507	1.82042		1720	2.21087	1.74627	2.04715	1.59236
	1730	2.23783	1.77741	2.06201	1.6139		1730	2.22195	1.64955	2.03609	1.73419		1730	2.23082	1.87671	1.73285	1.85156		1730	2.21265	1.7572	2.04533	1.58761
	1740	2.23807	1.77859	2.06509	1.60934		1740	2.23615	1.65499	2.04252	1.75778		1740	2.22358	1.8766	1.73129	1.83566		1740	2.20802	1.76905	2.04006	1.56823
	1750	2.23639	1.78241	2.06037	1.60647		1750	2.24326	1.65439	2.04747	1.77066		1750	2.21692	1.87296	1.73207	1.82247		1750	2.22279	1.77833	2.05268	1.5829
	1760	2.24115	1.79801	2.06374	1.598		1760	2.23485	1.62981	2.04013	1.78066		1760	2.22335	1.87106	1.73491	1.83733		1760	2.20945	1.76988	2.04651	1.5629
	1770	2.23162	1.79429	2.05279	1.58961		1770	2.23887	1.62745	2.03545	1.79818		1770	2.22179	1.87097	1.73619	1.83243		1770	2.20003	1.75487	2.03565	1.56743
	1780	2.22706	1.78709	2.05055	1.58783		1780	2.22044	1.60229	2.01642	1.79651		1780	2.22145	1.86531	1.74773	1.82641		1780	2.20152	1.76346	2.03039	1.56881
	1790	2.23975	1.80859	2.064	1.58172		1790	2.22773	1.59816	2.02709	1.80621		1790	2.22483	1.86257	1.75481	1.83064		1790	2.20178	1.78694	2.02869	1.54497
	1800	2.24034	1.81467	2.0664	1.57328		1800	2.23926	1.5929	2.0447	1.81945		1800	2.22088	1.85379	1.76108	1.82391		1800	2.2063	1.79357	2.03908	1.53649
	1810	2.22687	1.78656	2.04693	1.59256		1810	2.23113	1.59119	2.03775	1.80874		1810	2.21312	1.82051	1.77066	1.82928		1810	2.19301	1.78019	2.02651	1.5306
	1820	2.22807	1.7673	2.05106	1.61195		1820	2.23421	1.5769	2.04326	1.8226		1820	2.21057	1.83536	1.75794	1.82055		1820	2.20806	1.80011	2.04518	1.52572
	1830	2.24131	1.77814	2.06156	1.62329		1830	2.21907	1.54758	2.03168	1.82369		1830	2.21902	1.83082	1.77957	1.82465		1830	2.20516	1.78889	2.0427	1.53384
	1840	2.23654	1.7643	2.05576	1.63257		1840	2.22409	1.54123	2.0403	1.83165		1840	2.23133	1.83312	1.81621	1.81624		1840	2.20728	1.80201	2.04485	1.52169
	1850	2.23372	1.75606	2.05443	1.63542		1850	2.22742	1.54769	2.0377	1.83718		1850	2.2093	1.83177	1.79684	1.7827		1850	2.2211	1.82679	2.05637	1.51683
	1860	2.23293	1.74326	2.05692	1.64378		1860	2.23808	1.54399	2.05335	1.84876		1860	2.22031	1.84913	1.7954	1.79357		1860	2.21506	1.82121	2.05522	1.5074
	1870	2.23037	1.73695	2.05465	1.64638		1870	2.23696	1.53598	2.04813	1.85848		1870	2.22579	1.86202	1.78884	1.80033		1870	2.21889	1.82199	2.06024	1.51086
	1880	2.23399	1.73329	2.0584	1.65533		1880	2.23128	1.54017	2.03782	1.85267		1880	2.2299	1.8625	1.80915	1.78968		1880	2.2003	1.80121	2.04045	1.50827
	1890	2.23462	1.71335	2.06628	1.66792		1890	2.24479	1.55534	2.0641	1.84352		1890	2.22356	1.84773	1.80646	1.79195		1890	2.2233	1.81506	2.06569	1.52466
	1900	2.23438	1.71513	2.06755	1.66386		1900	2.23223	1.54063	2.05232	1.83851		1900	2.21893	1.84754	1.80117	1.78596		1900	2.21087	1.81976	2.0557	1.49615
	1910	2.23293	1.70881	2.06812	1.66578		1910	2.22421	1.54628	2.04476	1.8227		1910	2.22078	1.83962	1.78275	1.81696		1910	2.21967	1.82223	2.06154	1.5111
	1920	2.24239	1.72002	2.08153	1.66295		1920	2.23079	1.56456	2.04831	1.81917		1920	2.20843	1.83172	1.76057	1.81645		1920	2.21145	1.81136	2.05722	1.50594
	1930	2.23349	1.7228	2.06902	1.65168		1930	2.2428	1.57343	2.05406	1.8345		1930	2.21828	1.84532	1.77438	1.81327		1930	2.21373	1.81494	2.05415	1.51252
	1940	2.23306	1.71957	2.06669	1.65679		1940	2.22994	1.59104	2.03309	1.81118		1940	2.21849	1.83532	1.76222	1.83563		1940	2.20709	1.82306	2.04826	1.49115
	1950	2.21604	1.70487	2.04422	1.65415		1950	2.23133	1.57407	2.03259	1.82992		1950	2.20674	1.82765	1.75703	1.81987		1950	2.22811	1.83361	2.06884	1.51219
	1960	2.23542	1.71025	2.06818	1.67088		1960	2.24099	1.58274	2.04162	1.83597		1960	2.21211	1.8313	1.75768	1.82859		1960	2.22364	1.83562	2.06228	1.50554
	1970	2.23713	1.70832	2.07168	1.6731		1970	2.24269	1.56955	2.05334	1.83837		1970	2.21027	1.81479	1.76376	1.83473		1970	2.20965	1.82435	2.04888	1.4963
	1980	2.22068	1.71528	2.05576	1.64148		1980	2.24433	1.57521	2.05052	1.84068		1980	2.21214	1.80927	1.78587	1.82327		1980	2.21718	1.83566	2.05581	1.49524
	1990	2.21744	1.70957	2.05523	1.63935		1990	2.2462	1.56637	2.04935	1.85404		1990	2.20948	1.79477	1.8003	1.81694		1990	2.20552	1.83028	2.0457	1.48115
	2000	2.22746	1.73511	2.06761	1.62407		2000	2.24346	1.57765	2.05526	1.83115		2000	2.2129	1.80231	1.80997	1.80819		2000	2.21452	1.82096	2.05341	1.50858
	2010	2.22482	1.73676	2.06108	1.62336		2010	2.23884	1.56275	2.05596	1.83184		2010	2.21077	1.77024	1.8235	1.82103		2010	2.24063	1.83316	2.08804	1.52329
	2020	2.21398	1.72697	2.04415	1.62555		2020	2.24161	1.54991	2.05939	1.84563		2020	2.22083	1.78828	1.82465	1.82672		2020	2.23063	1.8162	2.07982	1.52553
	2030	2.23003	1.72899	2.0612	1.64565		2030	2.2312	1.57723	2.04991	1.80741		2030	2.22137	1.77737	1.82937	1.83394		2030	2.23586	1.83053	2.07989	1.52361
	2040	2.23374	1.73443	2.06121	1.64997		2040	2.24039	1.57739	2.06039	1.81805		2040	2.21404	1.773	1.81845	1.83131		2040	2.22319	1.81175	2.06457	1.52979
	2050	2.23207	1.728	2.05939	1.65445		2050	2.23181	1.57143	2.04524	1.81922		2050	2.20857	1.7738	1.79175	1.8436		2050	2.23608	1.82414	2.07421	1.53958
	2060	2.23345	1.71878	2.06246	1.66391		2060	2.23422	1.57282	2.03982	1.82999		2060	2.22739	1.76435	1.82151	1.86862		2060	2.22572	1.80002	2.07179	1.54119
	2070	2.23583	1.71319	2.0658	1.67193		2070	2.23525	1.57973	2.04163	1.82452		2070	2.21852	1.74369	1.81894	1.86941		2070	2.237	1.80583	2.09101	1.54111
	2080	2.22178	1.713	2.04729	1.65737		2080	2.22437	1.57322	2.03976	1.80555		2080	2.21977	1.74196	1.81624	1.8766		2080	2.22969	1.78692	2.07522	1.56315
	2090	2.23121	1.73043	2.05492	1.65514		2090	2.22505	1.57102	2.04023	1.80862		2090	2.21453	1.73963	1.80863	1.87373		2090	2.24046	1.80599	2.08165	1.5635
	2100	2.23397	1.74948	2.05653	1.64051		2100	2.23687	1.58169	2.05756	1.80883		2100	2.21339	1.73427	1.80182	1.88254		2100	2.22427	1.80482	2.06113	1.54568
	2110	2.2166	1.7448	2.03821	1.6211		2110	2.2305	1.5789	2.04999	1.80412		2110	2.2214	1.72852	1.80274	1.90568		2110	2.22235	1.79871	2.06187	1.5463
	2120	2.21156	1.74891	2.03219	1.61044		2120	2.2398	1.60618	2.04983	1.80327		2120	2.20508	1.7365	1.77462	1.88682		2120	2.21681	1.78231	2.05426	1.55945
	2130	2.21777	1.75146	2.03934	1.61569		2130	2.23155	1.61478	2.04643	1.77883		2130	2.20123	1.74425	1.76085	1.88356		2130	2.22686	1.79237	2.06799	1.55839
	2140	2.21731	1.73702	2.04495	1.62293		2140	2.23235	1.63554	2.04489	1.76359		2140	2.21326	1.76386	1.74705	1.9062		2140	2.21413	1.77461	2.0553	1.55925
	2150	2.22642	1.74251	2.05343	1.63126		2150	2.24242	1.64098	2.05429	1.77314		2150	2.19143	1.73832	1.74422	1.88167		2150	2.21969	1.76563	2.0609	1.57776
	2160	2.22688	1.73012	2.05286	1.64635		2160	2.23596	1.63952	2.05732	1.75454		2160	2.20951	1.73654	1.76784	1.90343		2160	2.22138	1.79155	2.04997	1.5675
	2170	2.22606	1.7089	2.04854	1.67147		2170	2.23973	1.64446	2.05845	1.75822		2170	2.20408	1.72262	1.77285	1.89883		2170	2.21772	1.8044	2.04464	1.54924
	2180	2.23425	1.70944	2.05214	1.68828		2180	2.21534	1.63454	2.03442	1.73345		2180	2.19933	1.71657	1.7741	1.89209		2180	2.2126	1.805	2.03439	1.54738
	2190	2.2173	1.70164	2.03233	1.67538		2190	2.24203	1.65758	2.06043	1.74941		2190	2.20992	1.73576	1.7712	1.90196		2190	2.22109	1.81722	2.04093	1.5488
	2200	2.23962	1.71715	2.05886	1.68651		2200	2.23393	1.6552	2.05121	1.74177		2200	2.20135	1.74891	1.74675	1.89264		2200	2.21211	1.78891	2.03038	1.56978
	2210	2.22318	1.71619	2.03985	1.66696		2210	2.22293	1.67375	2.02801	1.72295		2210	2.21544	1.77036	1.73904	1.91256		2210	2.20873	1.80351	2.03173	1.54155
	2220	2.22111	1.69694	2.03609	1.68562		2220	2.22722	1.67596	2.02936	1.73027		2220	2.21075	1.75712	1.72796	1.92394		2220	2.20832	1.80497	2.03347	1.53638
	2230	2.22608	1.70689	2.04234	1.68114		2230	2.2211	1.67651	2.02053	1.72434		2230	2.19736	1.75982	1.71403	1.90315		2230	2.20432	1.79255	2.03423	1.53843
	2240	2.22254	1.70032	2.04231	1.67846		2240	2.22086	1.68654	2.01593	1.71931		2240	2.20358	1.76722	1.73597	1.89072		2240	2.21145	1.79731	2.04458	1.5396
	2250	2.21521	1.69959	2.02885	1.67615		2250	2.23154	1.70324	2.02838	1.71587		2250	2.20568	1.75379	1.7454	1.89944		2250	2.20675	1.80807	2.0371	1.52336
	2260	2.21854	1.70756	2.02904	1.67664		2260	2.22553	1.6881	2.02881	1.7147		2260	2.21341	1.75056	1.7578	1.90894		2260	2.21012	1.82172	2.04328	1.5085
	2270	2.21877	1.71843	2.0288	1.6664		2270	2.23441	1.67212	2.04796	1.73063		2270	2.20464	1.73338	1.75867	1.9035		2270	2.20286	1.84882	2.03011	1.47162
	2280	2.23456	1.72538	2.04361	1.68321		2280	2.21901	1.64178	2.02697	1.74469		2280	2.21727	1.74636	1.76688	1.91337		2280	2.19294	1.83458	2.02244	1.4704
	2290	2.22872	1.70951	2.03596	1.69316		2290	2.22811	1.6458	2.03487	1.75488		2290	2.221	1.75596	1.76868	1.91157		2290	2.19904	1.83737	2.02414	1.48272
	2300	2.2206	1.70314	2.03006	1.68532		2300	2.21577	1.65654	2.02418	1.72565		2300	2.22002	1.75677	1.75676	1.91951		2300	2.21342	1.84117	2.03954	1.49961
	2310	2.22059	1.70825	2.03416	1.67514		2310	2.20542	1.65581	2.00747	1.71935		2310	2.21061	1.72246	1.76921	1.91745		2310	2.2148	1.82969	2.03507	1.52362
	2320	2.22962	1.7082	2.04747	1.68296		2320	2.22469	1.64462	2.04004	1.74125		2320	2.21693	1.73885	1.77415	1.91269		2320	2.19276	1.80789	2.01094	1.51789
	2330	2.23508	1.69521	2.05099	1.70614		2330	2.22942	1.6373	2.04574	1.7535		2330	2.21175	1.73447	1.78658	1.89299		2330	2.21025	1.83928	2.02708	1.50944
	2340	2.22295	1.71248	2.03639	1.67437		2340	2.23376	1.63006	2.05575	1.75961		2340	2.21687	1.73267	1.79759	1.89619		2340	2.22571	1.83855	2.04529	1.53105
	2350	2.22577	1.70899	2.03587	1.68603		2350	2.22735	1.60535	2.05868	1.76263		2350	2.21958	1.75861	1.78221	1.89318		2350	2.21729	1.82417	2.03201	1.54146
	2360	2.21973	1.70164	2.0284	1.68653		2360	2.22074	1.59369	2.05123	1.76521		2360	2.21674	1.75463	1.77363	1.89826		2360	2.21435	1.84232	2.0219	1.52462
	2370	2.21229	1.70399	2.0139	1.68199		2370	2.22645	1.59009	2.06112	1.77131		2370	2.22031	1.76791	1.76156	1.9055		2370	2.21089	1.84968	2.01818	1.51053
	2380	2.21143	1.72072	2.0165	1.65943		2380	2.22044	1.58786	2.05642	1.76369		2380	2.22143	1.78686	1.75713	1.89449		2380	2.20233	1.85284	2.007	1.49648
	2390	2.21137	1.73286	2.01428	1.64931		2390	2.2182	1.58625	2.055	1.76114		2390	2.21586	1.79351	1.75414	1.87785		2390	2.20574	1.85112	2.02061	1.49033
	2400	2.21056	1.72963	2.01299	1.6521		2400	2.20799	1.56331	2.0501	1.7617		2400	2.20972	1.78834	1.73939	1.88205		2400	2.20484	1.85227	2.01937	1.48791
	2410	2.22701	1.73912	2.02507	1.67144		2410	2.21764	1.57388	2.06357	1.76082		2410	2.22327	1.79981	1.74244	1.90012		2410	2.20567	1.85463	2.02321	1.48221
	2420	2.22306	1.74094	2.02783	1.65561		2420	2.22538	1.57766	2.06552	1.7746		2420	2.21154	1.7811	1.73262	1.89935		2420	2.215	1.86096	2.03181	1.49032
	2430	2.22397	1.75887	2.02261	1.64547		2430	2.23102	1.57185	2.0785	1.77878		2430	2.20848	1.78145	1.74027	1.88485		2430	2.21868	1.86359	2.02683	1.50468
	2440	2.21747	1.7551	2.00779	1.65008		2440	2.23504	1.58267	2.08215	1.77499		2440	2.20742	1.77811	1.73107	1.89396		2440	2.22042	1.87133	2.02185	1.5069
	2450	2.2192	1.75935	2.01091	1.64641		2450	2.22347	1.60476	2.07438	1.73475		2450	2.20835	1.76173	1.74731	1.89652		2450	2.21375	1.85105	2.00798	1.53067
	2460	2.21918	1.7765	2.00864	1.63062		2460	2.24079	1.61081	2.0949	1.74899		2460	2.20637	1.74558	1.76376	1.89162		2460	2.21297	1.86034	2.00493	1.52113
	2470	2.2054	1.78055	1.99743	1.60235		2470	2.2335	1.59452	2.08639	1.75543		2470	2.21142	1.76086	1.76313	1.88984		2470	2.21305	1.859	2.01194	1.51375
	2480	2.2296	1.81548	2.01626	1.60653		2480	2.22782	1.59541	2.08921	1.73674		2480	2.20742	1.77257	1.75316	1.87878		2480	2.20221	1.85074	1.9975	1.51136
	2490	2.22496	1.79338	2.01129	1.62462		2490	2.22101	1.59712	2.07431	1.73558		2490	2.21295	1.76769	1.76762	1.88284		2490	2.20665	1.84316	1.99832	1.53233
	2500	2.21988	1.77491	2.01073	1.63169		2500	2.22679	1.59635	2.08252	1.74124		2500	2.20933	1.75999	1.76706	1.88207		2500	2.21382	1.84242	2.00016	1.5514
	2510	2.2165	1.77274	2.0047	1.63228		2510	2.21837	1.58798	2.07419	1.73735		2510	2.21325	1.76333	1.75022	1.90377		2510	2.21692	1.84967	2.00692	1.54288
	2520	2.22706	1.76156	2.01438	1.66096		2520	2.21265	1.59574	2.06882	1.72199		2520	2.22283	1.78408	1.76429	1.89374		2520	2.22036	1.84921	2.00709	1.55307
	2530	2.22653	1.75679	2.0222	1.65507		2530	2.24318	1.64005	2.10188	1.71932		2530	2.21974	1.77387	1.77705	1.88413		2530	2.20204	1.82954	1.99481	1.53995
	2540	2.2463	1.76882	2.04054	1.67309		2540	2.22688	1.64245	2.07656	1.70535		2540	2.22393	1.78797	1.78375	1.87434		2540	2.21049	1.8381	2.0068	1.53839
	2550	2.24283	1.78564	2.03557	1.65184		2550	2.22313	1.6448	2.07145	1.6995		2550	2.2148	1.7842	1.77723	1.86247		2550	2.211	1.8299	2.01352	1.54087
	2560	2.24524	1.79029	2.04218	1.64515		2560	2.23125	1.65891	2.07669	1.70069		2560	2.20739	1.75851	1.78821	1.85878		2560	2.20502	1.82845	2.01425	1.52442
	2570	2.22013	1.75713	2.01697	1.64385		2570	2.23165	1.66042	2.07563	1.70154		2570	2.20953	1.77339	1.79114	1.84687		2570	2.20673	1.81624	2.02668	1.52745
	2580	2.22266	1.7551	2.01234	1.65849		2580	2.23974	1.66492	2.09061	1.70007		2580	2.21781	1.7856	1.80061	1.84576		2580	2.20516	1.80357	2.0262	1.53854
	2590	2.22496	1.76324	2.01646	1.65099		2590	2.2308	1.65981	2.07679	1.6985		2590	2.22555	1.78837	1.83389	1.82885		2590	2.20903	1.81309	2.03183	1.53101
	2600	2.22801	1.78712	2.01895	1.63035		2600	2.22257	1.6551	2.07056	1.68909		2600	2.21116	1.76848	1.84076	1.80624		2600	2.20064	1.81492	2.01994	1.52037
	2610	2.2235	1.77823	2.01021	1.63856		2610	2.23377	1.64855	2.0903	1.70069		2610	2.22368	1.75432	1.8569	1.83406		2610	2.20054	1.82738	2.01338	1.51383
	2620	2.22834	1.76482	2.02104	1.65282		2620	2.22729	1.65238	2.08339	1.68842		2620	2.19906	1.73843	1.82962	1.81717		2620	2.19	1.84099	1.99614	1.48943
	2630	2.21352	1.75411	2.00681	1.6417		2630	2.23444	1.65552	2.09551	1.68924		2630	2.20719	1.70624	1.84721	1.84931		2630	2.20864	1.86047	2.02008	1.488
	2640	2.22892	1.75951	2.01986	1.66145		2640	2.22867	1.62499	2.09115	1.70893		2640	2.19675	1.72117	1.82635	1.83123		2640	2.20383	1.861	2.01143	1.48479
	2650	2.2058	1.73907	1.98895	1.65856		2650	2.22922	1.63257	2.09373	1.69995		2650	2.20106	1.69605	1.84055	1.85071		2650	2.21576	1.87832	2.01897	1.48825
	2660	2.22095	1.76957	2.00846	1.64315		2660	2.22357	1.62487	2.09013	1.69696		2660	2.20477	1.69141	1.85012	1.85425		2660	2.21	1.86945	2.01021	1.49413
	2670	2.22515	1.78295	2.00806	1.64053		2670	2.22889	1.61988	2.09908	1.70463		2670	2.20883	1.70218	1.84649	1.85767		2670	2.2053	1.87161	1.99931	1.49216
	2680	2.23413	1.79776	2.01855	1.6359		2680	2.22872	1.59326	2.09969	1.72836		2680	2.19648	1.71041	1.8276	1.83941		2680	2.21392	1.88409	2.01339	1.48301
	2690	2.23638	1.80595	2.0199	1.63136		2690	2.22554	1.61942	2.09329	1.70341		2690	2.19149	1.69946	1.82764	1.83761		2690	2.2054	1.88131	2.00439	1.47332
	2700	2.22864	1.79214	2.01265	1.63437		2700	2.21657	1.61347	2.08245	1.69896		2700	2.19888	1.70213	1.82455	1.85579		2700	2.2083	1.88992	2.0074	1.46687
	2710	2.22503	1.80413	2.00687	1.61836		2710	2.22686	1.60648	2.09685	1.71472		2710	2.19838	1.70991	1.82447	1.84751		2710	2.20625	1.89108	2.00031	1.46888
	2720	2.22925	1.78138	2.01731	1.64203		2720	2.21846	1.63431	2.08664	1.67872		2720	2.19827	1.71261	1.83045	1.8388		2720	2.21622	1.90181	2.01769	1.46127
	2730	2.22274	1.78322	2.0053	1.63708		2730	2.21937	1.64008	2.08509	1.67743		2730	2.19572	1.71956	1.81612	1.84042		2730	2.21531	1.89809	2.01728	1.46392
	2740	2.2123	1.78732	1.98996	1.623		2740	2.22321	1.63617	2.08968	1.68569		2740	2.19404	1.72589	1.8014	1.84497		2740	2.20941	1.87555	2.01584	1.47704
	2750	2.23129	1.80696	2.00807	1.63092		2750	2.23396	1.62453	2.10613	1.70477		2750	2.19611	1.74624	1.7929	1.839		2750	2.21947	1.86132	2.03166	1.5033
	2760	2.21685	1.80232	1.99088	1.61769		2760	2.22016	1.61394	2.08917	1.69964		2760	2.1937	1.72297	1.8113	1.83718		2760	2.21597	1.85174	2.02711	1.51096
	2770	2.22847	1.78816	1.99935	1.65445		2770	2.23726	1.59519	2.11129	1.73451		2770	2.20225	1.72936	1.81979	1.84322		2770	2.20971	1.84038	2.02007	1.5159
	2780	2.22491	1.79017	1.9939	1.64927		2780	2.22149	1.60069	2.09503	1.70842		2780	2.19399	1.69516	1.82912	1.84607		2780	2.21161	1.82602	2.02195	1.53616
	2790	2.22176	1.79954	1.98769	1.63805		2790	2.22375	1.61102	2.09898	1.69971		2790	2.19123	1.69947	1.81494	1.84954		2790	2.21534	1.83992	2.0307	1.5187
	2800	2.22775	1.81107	1.99275	1.63544		2800	2.21742	1.61474	2.0886	1.69241		2800	2.19177	1.69356	1.81516	1.85602		2800	2.21459	1.85373	2.03606	1.49229
	2810	2.2138	1.81199	1.97573	1.61709		2810	2.21668	1.61689	2.08795	1.68921		2810	2.19906	1.6845	1.81888	1.87774		2810	2.22112	1.88311	2.0376	1.4727
	2820	2.22017	1.82548	1.98106	1.61285		2820	2.21966	1.61223	2.08378	1.70656		2820	2.19234	1.67395	1.80981	1.8802		2820	2.22651	1.88814	2.04043	1.47862
	2830	2.23753	1.84717	1.99341	1.6209		2830	2.22697	1.61273	2.08955	1.71804		2830	2.19601	1.66503	1.81784	1.88893		2830	2.21634	1.88368	2.02992	1.46817
	2840	2.22768	1.85342	1.98814	1.59287		2840	2.22516	1.65105	2.08698	1.67965		2840	2.19115	1.6532	1.80965	1.89588		2840	2.21365	1.87962	2.02386	1.47361
	2850	2.22331	1.84754	1.97934	1.59845		2850	2.22519	1.65173	2.0839	1.68288		2850	2.20484	1.66301	1.81505	1.9138		2850	2.21847	1.88529	2.02372	1.48104
	2860	2.22945	1.8456	1.97882	1.61831		2860	2.22871	1.65127	2.08821	1.6873		2860	2.19295	1.65682	1.79878	1.9072		2860	2.23171	1.91415	2.04046	1.46069
	2870	2.23668	1.84741	1.98503	1.62856		2870	2.2096	1.64268	2.0645	1.67455		2870	2.18951	1.65999	1.79257	1.90237		2870	2.21438	1.89952	2.02529	1.4481
	2880	2.22719	1.84643	1.98056	1.60898		2880	2.22124	1.64932	2.08063	1.67883		2880	2.18801	1.65095	1.81131	1.889		2880	2.21285	1.91295	2.02173	1.43061
	2890	2.22245	1.84361	1.96515	1.61797		2890	2.21927	1.63903	2.07834	1.68652		2890	2.20006	1.65898	1.81613	1.90525		2890	2.20928	1.9189	2.00685	1.43257
	2900	2.23825	1.86208	1.98504	1.61609		2900	2.22746	1.64461	2.08688	1.69214		2900	2.20249	1.64536	1.83301	1.9065		2900	2.2116	1.92741	2.00633	1.42903
	2910	2.21972	1.84337	1.95278	1.62572		2910	2.22104	1.65475	2.07719	1.67723		2910	2.20196	1.64297	1.84503	1.89572		2910	2.2165	1.94702	2.00742	1.41604
	2920	2.22462	1.85541	1.96603	1.60935		2920	2.21986	1.65565	2.06986	1.68228		2920	2.20737	1.65438	1.85441	1.88921		2920	2.22254	1.94583	2.01049	1.43213
	2930	2.21824	1.85879	1.94951	1.60795		2930	2.22292	1.63959	2.07671	1.69759		2930	2.20098	1.6217	1.86937	1.88789		2930	2.21745	1.94161	2.00715	1.42676
	2940	2.23303	1.86976	1.95156	1.63348		2940	2.22144	1.65811	2.07179	1.68164		2940	2.20559	1.63701	1.86668	1.8881		2940	2.22091	1.93502	2.01581	1.43426
	2950	2.22979	1.87052	1.95364	1.62123		2950	2.23222	1.65924	2.08463	1.69316		2950	2.21085	1.65389	1.85573	1.89648		2950	2.214	1.93121	2.00834	1.42849
	2960	2.23832	1.88196	1.96917	1.61267		2960	2.2205	1.6389	2.06815	1.70236		2960	2.21128	1.6459	1.87729	1.88318		2960	2.21655	1.9296	2.00889	1.43778
	2970	2.23801	1.88786	1.97571	1.59686		2970	2.21823	1.62644	2.06316	1.71438		2970	2.20816	1.63915	1.86839	1.89057		2970	2.21322	1.91944	2.00826	1.44199
	2980	2.23147	1.88022	1.97087	1.59353		2980	2.22858	1.61772	2.07494	1.73516		2980	2.21008	1.66262	1.8635	1.87936		2980	2.22149	1.92029	2.02567	1.44191
	2990	2.23216	1.8839	1.97247	1.58914		2990	2.2286	1.60699	2.07925	1.74		2990	2.2123	1.68148	1.85923	1.87202		2990	2.21672	1.92086	2.02407	1.42868
	3000	2.23104	1.88369	1.99061	1.56341		3000	2.21996	1.60561	2.06738	1.73332		3000	2.22295	1.6942	1.85869	1.88627		3000	2.21946	1.93193	2.02147	1.42596
	3010	2.22241	1.87314	1.97923	1.56595		3010	2.21208	1.60218	2.06109	1.72382		3010	2.21514	1.68158	1.86087	1.87701		3010	2.20861	1.92953	2.01465	1.405
	3020	2.21942	1.86542	1.97615	1.57057		3020	2.20005	1.58373	2.05141	1.72161		3020	2.20935	1.67221	1.84834	1.8841		3020	2.21358	1.9283	2.01998	1.41466
	3030	2.23164	1.8703	1.9924	1.57886		3030	2.2209	1.62311	2.07415	1.71121		3030	2.2192	1.6792	1.85509	1.89436		3030	2.21774	1.94725	2.01776	1.40483
	3040	2.22741	1.87306	1.98627	1.57133		3040	2.2094	1.62131	2.05607	1.70494		3040	2.23135	1.67582	1.86617	1.9149		3040	2.21538	1.94072	2.01554	1.4096
	3050	2.23551	1.88597	1.97899	1.588		3050	2.22531	1.63948	2.07254	1.70901		3050	2.20292	1.66068	1.82718	1.8998		3050	2.21586	1.95437	2.02141	1.38363
	3060	2.21866	1.86513	1.95777	1.59166		3060	2.23026	1.62947	2.08138	1.72071		3060	2.2045	1.66726	1.81816	1.90636		3060	2.20502	1.94509	2.01658	1.36905
	3070	2.22808	1.87914	1.95919	1.59972		3070	2.22681	1.63876	2.08022	1.70426		3070	2.21705	1.67632	1.82048	1.92521		3070	2.20272	1.93395	2.02104	1.37084
	3080	2.21647	1.88981	1.95299	1.56203		3080	2.21344	1.64063	2.06355	1.68784		3080	2.22669	1.68834	1.82591	1.9318		3080	2.22097	1.96939	2.0347	1.35901
	3090	2.23011	1.88886	1.97531	1.5739		3090	2.2239	1.64748	2.07901	1.68968		3090	2.2346	1.70121	1.84685	1.91883		3090	2.21889	1.97413	2.03618	1.34302
	3100	2.21828	1.87752	1.97348	1.55621		3100	2.22656	1.68193	2.08323	1.65723		3100	2.22291	1.69539	1.84229	1.90112		3100	2.20237	1.95769	2.02109	1.33546
	3110	2.21061	1.86104	1.95797	1.57368		3110	2.2343	1.70066	2.08886	1.65187		3110	2.22328	1.71992	1.82819	1.89355		3110	2.19815	1.94326	2.02029	1.34385
	3120	2.21154	1.8718	1.96745	1.55154		3120	2.22228	1.69888	2.0737	1.6403		3120	2.21916	1.71692	1.82193	1.89264		3120	2.20709	1.94619	2.02708	1.35859
	3130	2.22046	1.87732	1.97738	1.55774		3130	2.21149	1.67956	2.06143	1.64651		3130	2.2159	1.70993	1.82851	1.88498		3130	2.20465	1.94251	2.02079	1.3653
	3140	2.2177	1.86343	1.97857	1.56502		3140	2.22002	1.67424	2.07074	1.6631		3140	2.2248	1.72702	1.84649	1.87279		3140	2.22292	1.95276	2.0509	1.365
	3150	2.22102	1.87949	1.98074	1.55243		3150	2.22677	1.6621	2.07297	1.69032		3150	2.222	1.7244	1.8335	1.88129		3150	2.21552	1.95818	2.04241	1.34578
	3160	2.23425	1.89385	1.99481	1.55493		3160	2.22386	1.64738	2.06938	1.70144		3160	2.21074	1.74101	1.8099	1.86223		3160	2.21592	1.94917	2.04155	1.36139
	3170	2.23045	1.8819	1.99712	1.55557		3170	2.22289	1.65269	2.06151	1.70332		3170	2.20757	1.75697	1.78575	1.86304		3170	2.21391	1.95898	2.04307	1.33829
	3180	2.22239	1.87552	1.99515	1.54267		3180	2.21525	1.65798	2.0563	1.68445		3180	2.21769	1.76372	1.78966	1.87688		3180	2.20897	1.94261	2.0317	1.36291
	3190	2.22195	1.88198	1.98427	1.54757		3190	2.21691	1.65592	2.05914	1.68739		3190	2.21003	1.7589	1.79027	1.86271		3190	2.21247	1.94075	2.0386	1.36661
	3200	2.22387	1.88796	1.99098	1.53715		3200	2.21588	1.66859	2.05974	1.6714		3200	2.21603	1.75056	1.81014	1.8656		3200	2.21186	1.94702	2.04093	1.35218
	3210	2.21682	1.86351	1.98012	1.56046		3210	2.23997	1.69052	2.09091	1.67486		3210	2.23434	1.7556	1.82762	1.88738		3210	2.21695	1.94644	2.04511	1.36332
	3220	2.22106	1.86468	1.98487	1.56507		3220	2.2258	1.68029	2.08041	1.66038		3220	2.22303	1.74181	1.8294	1.87167		3220	2.21803	1.93801	2.04866	1.37349
	3230	2.22013	1.87517	1.97619	1.56087		3230	2.22522	1.69425	2.07482	1.65162		3230	2.21649	1.72941	1.83782	1.85935		3230	2.21422	1.9514	2.02539	1.37672
	3240	2.23629	1.88234	1.98962	1.58119		3240	2.23343	1.70179	2.08106	1.65817		3240	2.22262	1.7223	1.85291	1.86562		3240	2.19656	1.92082	2.00935	1.3866
	3250	2.23374	1.89763	1.99065	1.55419		3250	2.24429	1.69855	2.09023	1.67916		3250	2.22021	1.71	1.85759	1.86653		3250	2.2048	1.92525	2.01095	1.40418
	3260	2.229	1.88465	1.98136	1.56819		3260	2.22853	1.67615	2.0658	1.68987		3260	2.2065	1.70065	1.85607	1.84392		3260	2.20121	1.92193	2.01748	1.38803
	3270	2.23023	1.87156	1.98356	1.5845		3270	2.23551	1.68293	2.07869	1.68577		3270	2.21348	1.67433	1.88256	1.85784		3270	2.21562	1.91771	2.03529	1.41349
	3280	2.22482	1.87886	1.96867	1.5792		3280	2.22779	1.69103	2.06883	1.66926		3280	2.21991	1.67973	1.89692	1.8537		3280	2.20271	1.89398	2.01723	1.43092
	3290	2.22481	1.88362	1.95892	1.58562		3290	2.23232	1.70738	2.07454	1.6576		3290	2.22528	1.68714	1.89916	1.85754		3290	2.18928	1.88588	2.00796	1.41332
	3300	2.2195	1.88583	1.95007	1.57901		3300	2.23206	1.70826	2.07174	1.65949		3300	2.22862	1.66041	1.91716	1.8711		3300	2.21458	1.91575	2.02687	1.42491
	3310	2.2183	1.8906	1.93746	1.58543		3310	2.23	1.7109	2.07319	1.64939		3310	2.22034	1.65401	1.90449	1.87001		3310	2.20757	1.90927	2.0181	1.42433
	3320	2.21939	1.89765	1.9262	1.59375		3320	2.22622	1.69595	2.06944	1.65929		3320	2.21907	1.64351	1.9184	1.86202		3320	2.21171	1.90742	2.027	1.427
	3330	2.22466	1.90699	1.93267	1.58947		3330	2.23366	1.71049	2.07052	1.663		3330	2.2123	1.63116	1.91649	1.85875		3330	2.21524	1.91479	2.03358	1.41869
	3340	2.21111	1.89492	1.912	1.59108		3340	2.2308	1.70745	2.0652	1.66507		3340	2.19594	1.6233	1.90042	1.84326		3340	2.1969	1.89801	2.02156	1.40126
	3350	2.22478	1.90743	1.92507	1.59848		3350	2.23032	1.71457	2.06539	1.65622		3350	2.19573	1.62839	1.89486	1.844		3350	2.21408	1.9223	2.03409	1.40412
	3360	2.22501	1.90255	1.92294	1.60748		3360	2.2196	1.72362	2.06088	1.62331		3360	2.20037	1.63093	1.90674	1.84056		3360	2.21575	1.92846	2.03062	1.40596
	3370	2.21136	1.88729	1.90036	1.61462		3370	2.22906	1.72549	2.06995	1.63565		3370	2.19765	1.63933	1.89465	1.83908		3370	2.19353	1.91691	2.00474	1.3891
	3380	2.23081	1.90438	1.92868	1.61447		3380	2.22692	1.72544	2.06604	1.63483		3380	2.20156	1.64053	1.90382	1.8379		3380	2.21144	1.93513	2.02615	1.38958
	3390	2.22597	1.89527	1.90812	1.63613		3390	2.23109	1.72397	2.0686	1.64448		3390	2.21409	1.6359	1.92558	1.84943		3390	2.21356	1.93169	2.03135	1.39351
	3400	2.22134	1.90407	1.9174	1.60213		3400	2.2305	1.73424	2.06509	1.63648		3400	2.20027	1.62518	1.92101	1.83054		3400	2.2087	1.93098	2.0215	1.39339
	3410	2.22894	1.90864	1.92452	1.60925		3410	2.24342	1.73465	2.07698	1.65621		3410	2.20357	1.6481	1.91459	1.82471		3410	2.20905	1.93583	2.01293	1.40019
	3420	2.22357	1.90256	1.92632	1.59941		3420	2.25154	1.74835	2.08595	1.65257		3420	2.21392	1.6625	1.91725	1.83389		3420	2.20117	1.92754	2.00662	1.39585
	3430	2.21911	1.9037	1.92938	1.58188		3430	2.23617	1.72105	2.06662	1.66373		3430	2.21946	1.67502	1.92785	1.82475		3430	2.21327	1.94137	2.00863	1.41196
	3440	2.20585	1.89992	1.92024	1.56031		3440	2.21649	1.70975	2.0433	1.65146		3440	2.21308	1.67164	1.91395	1.82698		3440	2.20109	1.92706	1.99554	1.41203
	3450	2.21194	1.88226	1.93938	1.57521		3450	2.22879	1.71036	2.05767	1.66603		3450	2.21094	1.67916	1.90785	1.82128		3450	2.21025	1.92852	2.00562	1.42431
	3460	2.21554	1.89398	1.95863	1.54719		3460	2.23315	1.72214	2.06089	1.6616		3460	2.20986	1.67367	1.90099	1.83085		3460	2.21307	1.93037	2.01665	1.41497
	3470	2.22197	1.90538	1.9525	1.55934		3470	2.24145	1.735	2.06911	1.66035		3470	2.21041	1.66467	1.90949	1.83154		3470	2.21297	1.90521	2.02356	1.4387
	3480	2.21488	1.9034	1.93484	1.56361		3480	2.24583	1.73413	2.07112	1.67055		3480	2.21243	1.6697	1.90866	1.83271		3480	2.2012	1.89	2.02056	1.42681
	3490	2.2255	1.92212	1.94933	1.55281		3490	2.22352	1.71404	2.04706	1.66123		3490	2.20975	1.65466	1.92171	1.82622		3490	2.21405	1.90552	2.03873	1.42009
	3500	2.20325	1.90619	1.9212	1.54403		3500	2.24333	1.73386	2.06924	1.66643		3500	2.20823	1.64932	1.90796	1.84175		3500	2.19689	1.89184	2.01692	1.41621
	3510	2.20004	1.91486	1.9025	1.54731		3510	2.24207	1.73885	2.0682	1.65913		3510	2.21604	1.63863	1.93644	1.84032		3510	2.20822	1.90616	2.03078	1.41242
	3520	2.21691	1.9355	1.92922	1.53667		3520	2.23699	1.73646	2.0659	1.65076		3520	2.2058	1.61756	1.92626	1.84502		3520	2.19799	1.90755	2.01898	1.39545
	3530	2.214	1.92858	1.92937	1.53678		3530	2.23596	1.75076	2.06222	1.63741		3530	2.21719	1.61637	1.94088	1.85802		3530	2.1979	1.90406	2.02078	1.39732
	3540	2.22142	1.93357	1.91836	1.56545		3540	2.22305	1.75425	2.04765	1.61667		3540	2.21336	1.62023	1.9366	1.84997		3540	2.22017	1.90926	2.04273	1.42839
	3550	2.21556	1.93534	1.90345	1.56483		3550	2.23205	1.77337	2.06011	1.60474		3550	2.20739	1.59813	1.94271	1.84853		3550	2.21301	1.90927	2.03642	1.41508
	3560	2.22303	1.94898	1.91752	1.55187		3560	2.23545	1.76707	2.07298	1.60459		3560	2.21793	1.59026	1.95552	1.86694		3560	2.21603	1.89736	2.04425	1.42922
	3570	2.21128	1.94171	1.90938	1.53738		3570	2.23165	1.76134	2.0698	1.60442		3570	2.21744	1.62207	1.92855	1.86645		3570	2.21005	1.89352	2.03106	1.43458
	3580	2.22196	1.94668	1.927	1.53993		3580	2.23931	1.78007	2.07363	1.60012		3580	2.21622	1.62979	1.92468	1.86082		3580	2.21515	1.9072	2.04605	1.41069
	3590	2.19856	1.92302	1.90319	1.53205		3590	2.22071	1.75227	2.05449	1.60366		3590	2.22445	1.6239	1.9263	1.8838		3590	2.21423	1.9049	2.05006	1.40508
	3600	2.21144	1.93911	1.90713	1.54391		3600	2.22787	1.75892	2.06144	1.60731		3600	2.21132	1.60576	1.93084	1.86368		3600	2.20573	1.8918	2.04299	1.40633
	3610	2.22884	1.95126	1.9433	1.53352		3610	2.22939	1.76724	2.06443	1.59855		3610	2.21835	1.62253	1.93267	1.86396		3610	2.21054	1.8837	2.05084	1.42081
	3620	2.21561	1.93749	1.92847	1.53133		3620	2.22601	1.75392	2.0574	1.61278		3620	2.19828	1.60778	1.92093	1.8412		3620	2.20566	1.8865	2.03578	1.42358
	3630	2.22402	1.9494	1.93618	1.53086		3630	2.23454	1.76711	2.06462	1.61277		3630	2.2037	1.60075	1.93012	1.85061		3630	2.19656	1.87497	2.0236	1.42803
	3640	2.22423	1.96253	1.93436	1.51695		3640	2.22913	1.77247	2.0634	1.59334		3640	2.20232	1.59483	1.93665	1.84563		3640	2.21698	1.88774	2.05047	1.43597
	3650	2.22409	1.95379	1.91994	1.54587		3650	2.23832	1.77198	2.07503	1.60453		3650	2.1946	1.61092	1.91906	1.83157		3650	2.21841	1.89076	2.04712	1.44118
	3660	2.22672	1.96007	1.92996	1.53294		3660	2.23452	1.77579	2.06673	1.60042		3660	2.20233	1.61846	1.93041	1.83156		3660	2.21372	1.8965	2.03662	1.43408
	3670	2.22661	1.95017	1.94633	1.52453		3670	2.23188	1.76638	2.06223	1.60924		3670	2.19553	1.62397	1.91414	1.82743		3670	2.20521	1.88334	2.02651	1.4395
	3680	2.21978	1.94238	1.93527	1.52865		3680	2.24179	1.79166	2.07196	1.59632		3680	2.19691	1.62907	1.90461	1.83615		3680	2.20329	1.89055	2.02188	1.43067
	3690	2.22126	1.95269	1.92065	1.53822		3690	2.2291	1.78633	2.05924	1.58315		3690	2.19688	1.62836	1.89597	1.84561		3690	2.20253	1.87004	2.0251	1.45057
	3700	2.22631	1.96486	1.91641	1.54259		3700	2.23622	1.77893	2.06816	1.59985		3700	2.19877	1.62863	1.90997	1.83542		3700	2.19297	1.85105	2.01045	1.46627
	3710	2.22412	1.97449	1.9015	1.54245		3710	2.21966	1.76819	2.05452	1.58311		3710	2.19251	1.62272	1.91275	1.82274		3710	2.19365	1.84579	2.0211	1.46029
	3720	2.2223	1.97264	1.89425	1.54848		3720	2.22749	1.75676	2.06501	1.60403		3720	2.20073	1.59981	1.92849	1.84606		3720	2.20694	1.86429	2.02312	1.47396
	3730	2.21281	1.96815	1.87769	1.54717		3730	2.22441	1.75592	2.05576	1.60828		3730	2.19129	1.6048	1.92766	1.81995		3730	2.21304	1.86583	2.03769	1.47022
	3740	2.22341	1.97244	1.90894	1.5338		3740	2.23331	1.75317	2.06649	1.62216		3740	2.1992	1.63793	1.91747	1.82029		3740	2.21677	1.84762	2.03913	1.50212
	3750	2.23356	1.98972	1.93769	1.50466		3750	2.23279	1.756	2.06758	1.61626		3750	2.20256	1.65708	1.90863	1.82037		3750	2.20494	1.83579	2.02205	1.5049
	3760	2.2301	1.98837	1.92644	1.5106		3760	2.22648	1.75457	2.05979	1.61034		3760	2.20502	1.66122	1.90105	1.83047		3760	2.20706	1.83809	2.02496	1.50438
	3770	2.22637	1.97975	1.92272	1.51563		3770	2.23227	1.73994	2.07453	1.62327		3770	2.21068	1.64541	1.91833	1.84033		3770	2.21195	1.84038	2.01909	1.52374
	3780	2.2337	1.97789	1.92491	1.53672		3780	2.22233	1.71888	2.06381	1.63206		3780	2.20719	1.64438	1.92616	1.82464		3780	2.21567	1.84263	2.02177	1.52824
	3790	2.22405	1.96766	1.91075	1.53952		3790	2.22954	1.72145	2.06806	1.64359		3790	2.19591	1.62892	1.91526	1.82277		3790	2.20192	1.84088	2.00856	1.50791
	3800	2.23656	1.99305	1.92625	1.52373		3800	2.22194	1.73368	2.06331	1.61591		3800	2.2025	1.63285	1.92504	1.82485		3800	2.21404	1.83877	2.01176	1.54134
	3810	2.2251	1.98041	1.91545	1.52024		3810	2.23241	1.73971	2.07024	1.62937		3810	2.19462	1.62082	1.9213	1.82051		3810	2.21659	1.83205	2.01593	1.55117
	3820	2.22593	1.97427	1.92061	1.52416		3820	2.22262	1.74021	2.06271	1.61151		3820	2.19621	1.63984	1.91162	1.81749		3820	2.20891	1.80694	2.00483	1.57297
	3830	2.23717	1.98652	1.92676	1.53336		3830	2.23211	1.72879	2.07149	1.63856		3830	2.21004	1.65582	1.9127	1.83533		3830	2.21876	1.8173	2.01326	1.57796
	3840	2.2396	2.00049	1.93815	1.50771		3840	2.22924	1.73128	2.06568	1.63545		3840	2.20427	1.64263	1.91518	1.83072		3840	2.20507	1.80403	1.99496	1.57807
	3850	2.21904	1.98357	1.91704	1.49623		3850	2.23601	1.72065	2.07283	1.65596		3850	2.19456	1.63245	1.9126	1.81915		3850	2.20956	1.79974	2.00965	1.5769
	3860	2.23105	1.99876	1.94109	1.48063		3860	2.22945	1.70035	2.06342	1.67092		3860	2.20248	1.63509	1.9222	1.82579		3860	2.20837	1.78513	2.00885	1.5911
	3870	2.22638	1.99753	1.93675	1.47392		3870	2.2376	1.69401	2.0754	1.68427		3870	2.19701	1.62464	1.92352	1.82052		3870	2.20215	1.75964	2.00575	1.60611
	3880	2.22409	2.00069	1.92893	1.47297		3880	2.24413	1.69076	2.07849	1.70102		3880	2.20254	1.622	1.93595	1.82308		3880	2.20135	1.74974	2.01788	1.59952
	3890	2.23417	2.01615	1.92411	1.48861		3890	2.23329	1.67496	2.06592	1.70341		3890	2.20417	1.62356	1.94206	1.81912		3890	2.20219	1.74263	2.02686	1.59823
	3900	2.21959	1.99852	1.90625	1.49173		3900	2.23438	1.66885	2.06845	1.70922		3900	2.20193	1.60406	1.95286	1.81943		3900	2.20731	1.72911	2.03002	1.62286
	3910	2.22306	2.00754	1.91854	1.4741		3910	2.23393	1.66873	2.07518	1.69994		3910	2.20325	1.64392	1.9444	1.79596		3910	2.21037	1.72418	2.04218	1.62117
	3920	2.21435	1.9987	1.9249	1.45143		3920	2.23663	1.70193	2.07669	1.67207		3920	2.20648	1.64121	1.94784	1.80261		3920	2.21445	1.73613	2.04611	1.61458
	3930	2.22724	2.01045	1.92963	1.46827		3930	2.23482	1.70698	2.07677	1.66196		3930	2.18928	1.63122	1.95257	1.76422		3930	2.22004	1.76504	2.05175	1.59125
	3940	2.22077	2.00406	1.91585	1.47543		3940	2.22819	1.71632	2.07746	1.63342		3940	2.20441	1.65714	1.96149	1.76784		3940	2.21685	1.76825	2.04104	1.59257
	3950	2.21469	2.0051	1.91625	1.4551		3950	2.22197	1.71588	2.07303	1.62255		3950	2.20833	1.66645	1.96758	1.7621		3950	2.21519	1.77266	2.04441	1.57866
	3960	2.21512	2.00726	1.91803	1.45106		3960	2.2188	1.72993	2.07332	1.59838		3960	2.20137	1.65864	1.94925	1.7724		3960	2.22308	1.78475	2.04661	1.58436
	3970	2.21161	2.00784	1.90025	1.4629		3970	2.212	1.72292	2.06662	1.59577		3970	2.19629	1.63939	1.94645	1.78076		3970	2.215	1.76383	2.0363	1.59838
	3980	2.22012	2.02084	1.91569	1.45059		3980	2.22211	1.71137	2.07911	1.6199		3980	2.19628	1.61928	1.95029	1.79488		3980	2.22046	1.76089	2.04553	1.60498
	3990	2.21817	2.01954	1.90919	1.455		3990	2.20927	1.70465	2.06762	1.60651		3990	2.20055	1.61983	1.95335	1.8015		3990	2.22386	1.74206	2.05191	1.62666
	4000	2.21024	2.00916	1.89637	1.46199		4000	2.21118	1.69195	2.07178	1.61978		4000	2.18507	1.61899	1.94553	1.7728		4000	2.22032	1.74048	2.04408	1.62852
	4010	2.22782	2.03636	1.89812	1.47537		4010	2.20959	1.69132	2.07074	1.61742		4010	2.20811	1.64411	1.94889	1.80283		4010	2.22618	1.75563	2.05042	1.6203
	4020	2.2224	2.03176	1.88541	1.48167		4020	2.21812	1.70328	2.07742	1.61964		4020	2.18857	1.64963	1.93323	1.76663		4020	2.21967	1.74179	2.04149	1.62859
	4030	2.21883	2.02515	1.87009	1.49931		4030	2.22083	1.70893	2.07991	1.61793		4030	2.19911	1.66058	1.94631	1.7682		4030	2.2064	1.73044	2.01622	1.63611
	4040	2.21846	2.01875	1.86739	1.51017		4040	2.22189	1.70246	2.0852	1.62084		4040	2.20278	1.65746	1.9526	1.77331		4040	2.2155	1.73205	2.02176	1.65207
	4050	2.22997	2.03679	1.88242	1.50118		4050	2.21847	1.70825	2.07969	1.61244		4050	2.18889	1.64411	1.93464	1.77104		4050	2.21739	1.72505	2.02925	1.65531
	4060	2.23385	2.04067	1.8861	1.50283		4060	2.22372	1.69853	2.08715	1.62748		4060	2.19954	1.65153	1.95543	1.76767		4060	2.23482	1.72241	2.04747	1.68226
	4070	2.22082	2.02892	1.87929	1.48858		4070	2.2197	1.70383	2.08209	1.6174		4070	2.1919	1.63677	1.96197	1.75514		4070	2.20895	1.69887	2.01183	1.68087
	4080	2.22113	2.02832	1.88624	1.48151		4080	2.23342	1.69544	2.09742	1.64398		4080	2.1919	1.64204	1.96273	1.74937		4080	2.21297	1.70031	2.02333	1.67616
	4090	2.23022	2.03329	1.88556	1.50272		4090	2.23245	1.69252	2.08869	1.65541		4090	2.19948	1.66511	1.97054	1.73776		4090	2.21896	1.68818	2.04065	1.68325
	4100	2.22154	2.02244	1.87458	1.50539		4100	2.22854	1.68013	2.08761	1.65885		4100	2.20831	1.66948	1.96611	1.76084		4100	2.21059	1.68724	2.0282	1.6772
	4110	2.21654	2.01391	1.87178	1.50555		4110	2.22896	1.68272	2.09387	1.64945		4110	2.2075	1.68612	1.94632	1.76492		4110	2.22291	1.69404	2.04348	1.68436
	4120	2.22462	2.03146	1.88497	1.48928		4120	2.21211	1.65952	2.0739	1.65282		4120	2.20952	1.67325	1.96018	1.76689		4120	2.20998	1.68134	2.03347	1.67514
	4130	2.22869	2.03422	1.89705	1.48231		4130	2.21634	1.65494	2.07456	1.66783		4130	2.22082	1.67874	1.9643	1.78534		4130	2.21294	1.67664	2.03893	1.68104
	4140	2.22079	2.02217	1.89854	1.47316		4140	2.21823	1.66724	2.07621	1.65854		4140	2.21044	1.65085	1.95568	1.79501		4140	2.2133	1.66783	2.03831	1.69147
	4150	2.22116	2.02558	1.90204	1.46506		4150	2.22477	1.6644	2.0834	1.66986		4150	2.18848	1.64024	1.92963	1.77906		4150	2.22472	1.66133	2.05078	1.71261
	4160	2.22206	2.02856	1.90366	1.46157		4160	2.23195	1.68342	2.08838	1.66371		4160	2.21264	1.65203	1.95794	1.79689		4160	2.22413	1.66804	2.04516	1.71128
	4170	2.22473	2.03106	1.90003	1.47089		4170	2.22581	1.68245	2.08355	1.65428		4170	2.19316	1.63822	1.94569	1.77496		4170	2.22686	1.67642	2.04827	1.70646
	4180	2.22268	2.02173	1.89898	1.4789		4180	2.21908	1.66821	2.0766	1.65936		4180	2.21672	1.62813	1.97382	1.81133		4180	2.23865	1.71111	2.05519	1.69453
	4190	2.21568	2.01831	1.89062	1.47324		4190	2.22548	1.66201	2.0868	1.66989		4190	2.20439	1.61486	1.95587	1.81259		4190	2.22237	1.71873	2.02753	1.67718
	4200	2.22632	2.02745	1.89678	1.48481		4200	2.22586	1.66644	2.08363	1.67046		4200	2.22005	1.64398	1.95603	1.82442		4200	2.21336	1.7106	2.01021	1.6825
	4210	2.19994	1.9977	1.88073	1.4668		4210	2.2318	1.70162	2.08872	1.64428		4210	2.21399	1.64538	1.96804	1.79527		4210	2.21632	1.70044	2.02109	1.68757
	4220	2.20672	2.00881	1.88212	1.47021		4220	2.2441	1.67031	2.10094	1.69354		4220	2.20482	1.63544	1.96912	1.78056		4220	2.22327	1.72378	2.03042	1.67087
	4230	2.2083	2.00835	1.90141	1.45063		4230	2.23382	1.64403	2.09173	1.70343		4230	2.20097	1.63975	1.96369	1.77305		4230	2.2344	1.71436	2.04405	1.6935
	4240	2.20834	2.01561	1.89834	1.4447		4240	2.2361	1.63264	2.0926	1.71924		4240	2.20508	1.63922	1.96916	1.77767		4240	2.2285	1.72555	2.03287	1.67999
	4250	2.20609	2.01382	1.88722	1.45486		4250	2.22482	1.61791	2.07908	1.72032		4250	2.2034	1.63254	1.9646	1.78468		4250	2.21321	1.73322	2.0183	1.64894
	4260	2.2036	2.0004	1.88589	1.46749		4260	2.22868	1.63145	2.08263	1.71321		4260	2.19715	1.62671	1.9618	1.77768		4260	2.22062	1.73841	2.03489	1.643
	4270	2.20784	2.01062	1.88166	1.47169		4270	2.22558	1.63341	2.07985	1.70665		4270	2.2065	1.64793	1.95295	1.79098		4270	2.20594	1.73063	2.00492	1.6485
	4280	2.21631	2.01794	1.88772	1.47934		4280	2.23608	1.63202	2.08673	1.7269		4280	2.21586	1.6527	1.95809	1.80404		4280	2.21623	1.72817	2.01745	1.66332
	4290	2.21367	2.01636	1.8841	1.47821		4290	2.23571	1.61451	2.0869	1.74212		4290	2.20525	1.64278	1.95007	1.79575		4290	2.21687	1.71165	2.02506	1.67284
	4300	2.22116	2.02468	1.89588	1.47424		4300	2.23757	1.63353	2.08616	1.73003		4300	2.19119	1.64192	1.9325	1.78106		4300	2.206	1.71886	2.00903	1.65596
	4310	2.21433	2.01798	1.8894	1.47119		4310	2.22595	1.6317	2.07603	1.71387		4310	2.20141	1.63352	1.94307	1.80235		4310	2.2126	1.7232	2.01564	1.66103
	4320	2.20084	2.00295	1.87986	1.46347		4320	2.22432	1.6499	2.0749	1.69347		4320	2.1957	1.62381	1.94266	1.79764		4320	2.20797	1.70815	2.01501	1.665
	4330	2.22463	2.02635	1.88484	1.4964		4330	2.23629	1.64491	2.09172	1.70908		4330	2.18417	1.62132	1.92214	1.79385		4330	2.19215	1.691	1.99649	1.66302
	4340	2.20879	2.01404	1.87875	1.47359		4340	2.23978	1.66654	2.09301	1.69563		4340	2.20256	1.64266	1.93104	1.80977		4340	2.19643	1.70235	2.00011	1.65836
	4350	2.22435	2.03165	1.89889	1.47039		4350	2.25901	1.67806	2.11455	1.70853		4350	2.20262	1.65751	1.92557	1.80219		4350	2.2133	1.73017	2.00444	1.66917
	4360	2.21658	2.02441	1.90196	1.45284		4360	2.23016	1.64744	2.07262	1.71389		4360	2.203	1.66629	1.91814	1.80295		4360	2.21386	1.70952	2.01195	1.68285
	4370	2.22074	2.02663	1.91068	1.45101		4370	2.24665	1.67875	2.08464	1.71201		4370	2.19995	1.66154	1.90513	1.81366		4370	2.20773	1.71155	1.99806	1.68121
	4380	2.21421	2.01911	1.89249	1.46531		4380	2.22454	1.67242	2.06562	1.68327		4380	2.1933	1.65738	1.89697	1.8099		4380	2.21568	1.70731	2.01137	1.69056
	4390	2.22345	2.02499	1.89721	1.47902		4390	2.22991	1.69602	2.07644	1.66038		4390	2.19504	1.66297	1.88889	1.81742		4390	2.20583	1.70046	2.0034	1.68114
	4400	2.21988	2.03307	1.89355	1.46179		4400	2.2179	1.67404	2.06841	1.66055		4400	2.19714	1.67076	1.88493	1.81947		4400	2.20935	1.7243	2.00292	1.6666
	4410	2.22784	2.03417	1.90589	1.46842		4410	2.22749	1.66343	2.07398	1.68968		4410	2.20758	1.66319	1.90369	1.83209		4410	2.21502	1.72949	2.00637	1.67213
	4420	2.22413	2.03863	1.89611	1.46364		4420	2.23136	1.66084	2.06485	1.71347		4420	2.19515	1.64674	1.88867	1.83264		4420	2.20742	1.73844	1.98705	1.66579
	4430	2.232	2.0503	1.90793	1.45591		4430	2.23769	1.67619	2.06814	1.71106		4430	2.20047	1.64313	1.90216	1.83469		4430	2.19859	1.72124	1.97405	1.67572
	4440	2.22845	2.04275	1.90646	1.45758		4440	2.23611	1.68816	2.07254	1.6897		4440	2.19397	1.62727	1.90194	1.83347		4440	2.20841	1.71707	1.97161	1.70837
	4450	2.23402	2.052	1.91749	1.44715		4450	2.22453	1.68327	2.05883	1.68075		4450	2.1882	1.59776	1.91319	1.83393		4450	2.22176	1.7408	1.98158	1.70745
	4460	2.21493	2.02134	1.90209	1.45191		4460	2.23316	1.68295	2.06968	1.6906		4460	2.19789	1.6183	1.91914	1.83288		4460	2.2098	1.73657	1.97369	1.68976
	4470	2.2327	2.03786	1.91189	1.47028		4470	2.21775	1.65443	2.053	1.69848		4470	2.19175	1.62302	1.90738	1.82628		4470	2.20684	1.73066	1.96096	1.70286
	4480	2.21873	2.02964	1.87609	1.48538		4480	2.22801	1.68134	2.06433	1.68514		4480	2.20104	1.61643	1.90822	1.85337		4480	2.20902	1.71539	1.95884	1.72624
	4490	2.23921	2.05638	1.90008	1.47958		4490	2.21383	1.674	2.04601	1.6774		4490	2.201	1.59186	1.92209	1.86021		4490	2.213	1.71049	1.96647	1.73262
	4500	2.23237	2.05255	1.88552	1.48283		4500	2.22417	1.66108	2.06446	1.69491		4500	2.22305	1.5883	1.93503	1.90181		4500	2.21843	1.70177	1.99215	1.72573
	4510	2.23571	2.06455	1.88514	1.4767		4510	2.23229	1.66984	2.06994	1.70095		4510	2.22426	1.58321	1.93816	1.90568		4510	2.2211	1.69459	1.98415	1.74875
	4520	2.23262	2.06101	1.87785	1.48159		4520	2.21699	1.64881	2.05457	1.70006		4520	2.20936	1.56733	1.92518	1.89729		4520	2.20458	1.69091	1.96084	1.73673
	4530	2.22632	2.05588	1.8688	1.4812		4530	2.22371	1.64845	2.05852	1.71316		4530	2.21242	1.56117	1.93117	1.9034		4530	2.2231	1.70415	1.97254	1.75765
	4540	2.22488	2.05342	1.86347	1.48696		4540	2.22404	1.6576	2.05646	1.70764		4540	2.20156	1.59761	1.89822	1.881		4540	2.21402	1.69574	1.96409	1.75231
	4550	2.22224	2.04714	1.86506	1.48576		4550	2.21986	1.67109	2.05683	1.68299		4550	2.20635	1.62836	1.87281	1.89129		4550	2.21461	1.68824	1.96053	1.76499
	4560	2.21712	2.0389	1.87659	1.46716		4560	2.23288	1.69842	2.06817	1.67617		4560	2.1949	1.62691	1.8512	1.88718		4560	2.22447	1.69129	1.97458	1.7712
	4570	2.22868	2.04384	1.89115	1.47657		4570	2.22404	1.69139	2.05469	1.67635		4570	2.20264	1.61302	1.86883	1.8997		4570	2.20964	1.665	1.97015	1.7639
	4580	2.21487	2.02412	1.87716	1.48004		4580	2.23693	1.72421	2.06476	1.6648		4580	2.20768	1.60227	1.89167	1.89791		4580	2.20852	1.65774	1.9675	1.77086
	4590	2.21894	2.02086	1.86467	1.5121		4590	2.22578	1.72547	2.05642	1.64381		4590	2.20313	1.62131	1.87376	1.8889		4590	2.21798	1.67282	1.96031	1.78822
	4600	2.2259	2.02748	1.8792	1.5057		4600	2.22552	1.74316	2.06447	1.61406		4600	2.19315	1.61759	1.86186	1.88061		4600	2.21837	1.6669	1.96904	1.78511
	4610	2.21943	2.02572	1.86425	1.50756		4610	2.22467	1.75381	2.0497	1.61901		4610	2.19353	1.61473	1.86484	1.88101		4610	2.20576	1.66411	1.95915	1.76726
	4620	2.2186	2.01803	1.85595	1.52555		4620	2.2303	1.75889	2.05615	1.6208		4620	2.2063	1.62652	1.88087	1.88477		4620	2.20991	1.70123	1.95337	1.74859
	4630	2.2149	2.00793	1.85499	1.52931		4630	2.21579	1.75173	2.04001	1.60912		4630	2.18964	1.63496	1.86463	1.85447		4630	2.21257	1.70593	1.95981	1.74352
	4640	2.21447	2.00106	1.85199	1.54067		4640	2.22213	1.72656	2.05394	1.63587		4640	2.20507	1.65912	1.87816	1.85594		4640	2.21427	1.713	1.96609	1.73381
	4650	2.22637	2.01214	1.85922	1.55178		4650	2.22244	1.73688	2.0535	1.6263		4650	2.20453	1.64796	1.89011	1.85247		4650	2.2076	1.72937	1.95458	1.71344
	4660	2.22465	2.00551	1.86036	1.55407		4660	2.22488	1.74717	2.05339	1.62207		4660	2.20455	1.66137	1.88474	1.84599		4660	2.21387	1.73869	1.96208	1.71161
	4670	2.24832	2.01364	1.89242	1.57287		4670	2.23887	1.78234	2.06791	1.60377		4670	2.20309	1.65461	1.89088	1.84229		4670	2.20775	1.74363	1.96228	1.69043
	4680	2.22927	1.98324	1.90651	1.5399		4680	2.22111	1.74436	2.04826	1.62128		4680	2.20715	1.67851	1.87943	1.8421		4680	2.20995	1.73875	1.96798	1.69457
	4690	2.23327	1.98803	1.89782	1.55595		4690	2.24036	1.75143	2.07349	1.6345		4690	2.20588	1.68441	1.86924	1.84405		4690	2.2064	1.72638	1.98443	1.67871
	4700	2.23086	1.98595	1.89738	1.55224		4700	2.22885	1.74684	2.05926	1.62591		4700	2.19693	1.68004	1.86749	1.82838		4700	2.20089	1.7234	1.98396	1.66783
	4710	2.22962	1.98519	1.91164	1.532		4710	2.21756	1.74949	2.04035	1.61599		4710	2.18925	1.69109	1.85947	1.80782		4710	2.20338	1.72809	1.9898	1.66259
	4720	2.22737	1.97597	1.90435	1.5464		4720	2.22023	1.76212	2.04881	1.59879		4720	2.20271	1.6858	1.86852	1.8359		4720	2.20314	1.71101	2.00151	1.66555
	4730	2.23751	1.98758	1.90584	1.55892		4730	2.21934	1.74621	2.04754	1.61533		4730	2.20121	1.6865	1.87215	1.82795		4730	2.20755	1.71615	2.00297	1.67019
	4740	2.23412	1.98242	1.91571	1.54359		4740	2.22679	1.72589	2.06261	1.63834		4740	2.18972	1.67199	1.86772	1.8182		4740	2.20196	1.70956	2.00914	1.65471
	4750	2.23038	1.99221	1.89666	1.5437		4750	2.23175	1.73911	2.06602	1.63357		4750	2.208	1.66425	1.88836	1.84794		4750	2.20828	1.71913	2.0158	1.65351
	4760	2.22448	1.97696	1.89183	1.55217		4760	2.22642	1.71831	2.05504	1.65472		4760	2.19689	1.64235	1.89171	1.83759		4760	2.2061	1.74427	2.01708	1.61945
	4770	2.22681	1.99355	1.89339	1.53563		4770	2.22721	1.73463	2.05435	1.6406		4770	2.20399	1.66083	1.89884	1.83063		4770	2.20475	1.75567	2.00867	1.61393
	4780	2.22075	1.98885	1.88376	1.53603		4780	2.21954	1.72773	2.04657	1.63684		4780	2.2097	1.64569	1.9048	1.85174		4780	2.19546	1.73683	2.00727	1.61071
	4790	2.21691	1.98114	1.8929	1.52362		4790	2.21695	1.72262	2.05069	1.63001		4790	2.21207	1.63453	1.92324	1.84823		4790	2.20803	1.76226	2.02814	1.5912
	4800	2.23123	1.99468	1.89712	1.54238		4800	2.21803	1.74268	2.05639	1.60426		4800	2.21409	1.63452	1.90942	1.86732		4800	2.20692	1.75064	2.02141	1.60941
	4810	2.24092	2.00195	1.91789	1.53538		4810	2.22811	1.73848	2.07155	1.61721		4810	2.19998	1.65466	1.88642	1.83937		4810	2.20658	1.75897	2.01577	1.60644
	4820	2.22864	1.99387	1.91204	1.51732		4820	2.23081	1.72845	2.07627	1.6293		4820	2.20343	1.66453	1.86791	1.85753		4820	2.20105	1.75346	2.0002	1.61673
	4830	2.21983	1.98573	1.90716	1.50829		4830	2.22116	1.72036	2.0655	1.62515		4830	2.19433	1.67724	1.8548	1.8376		4830	2.20152	1.75923	2.00942	1.60023
	4840	2.2169	1.98923	1.91778	1.48136		4840	2.21745	1.73962	2.06405	1.59612		4840	2.20548	1.6904	1.84984	1.85713		4840	2.21	1.77644	2.01744	1.5945
	4850	2.22021	1.99916	1.91571	1.48058		4850	2.22663	1.73309	2.07158	1.61887		4850	2.20517	1.68277	1.8461	1.86701		4850	2.20318	1.78157	2.01888	1.56784
	4860	2.24202	2.02198	1.93117	1.49515		4860	2.23235	1.76301	2.07733	1.59474		4860	2.20583	1.66253	1.87653	1.85634		4860	2.20363	1.78018	2.02194	1.56675
	4870	2.22792	2.00957	1.91328	1.49272		4870	2.22817	1.78169	2.07104	1.57029		4870	2.19904	1.65687	1.86484	1.85707		4870	2.20523	1.75998	2.02433	1.5908
	4880	2.21116	1.99655	1.90622	1.4692		4880	2.21328	1.76815	2.05477	1.56485		4880	2.20321	1.64752	1.88278	1.85716		4880	2.2114	1.76981	2.02217	1.59976
	4890	2.22437	2.01327	1.9217	1.4661		4890	2.22708	1.77829	2.06931	1.57334		4890	2.20101	1.65263	1.88371	1.84645		4890	2.21087	1.78308	2.01638	1.59081
	4900	2.22633	2.02032	1.91516	1.4709		4900	2.23786	1.78242	2.08245	1.58192		4900	2.20137	1.66424	1.87139	1.84938		4900	2.21757	1.77519	2.02223	1.61075
	4910	2.22984	2.02702	1.92462	1.45995		4910	2.22263	1.77275	2.0635	1.57464		4910	2.19812	1.67822	1.84877	1.85177		4910	2.21102	1.77638	2.00992	1.60686
	4920	2.22322	2.03246	1.90754	1.45458		4920	2.22955	1.77571	2.07277	1.57868		4920	2.19661	1.68224	1.84334	1.84997		4920	2.22657	1.80296	2.03062	1.59409
	4930	2.23044	2.04703	1.91353	1.4484		4930	2.2315	1.78721	2.07283	1.57113		4930	2.20524	1.68429	1.8521	1.85985		4930	2.22583	1.7979	2.03771	1.58868
	4940	2.23604	2.05257	1.91972	1.44962		4940	2.2294	1.80832	2.07297	1.54054		4940	2.22127	1.69482	1.87229	1.86821		4940	2.21237	1.78808	2.0255	1.57775
	4950	2.21429	2.01914	1.9007	1.45486		4950	2.22429	1.79759	2.06868	1.54407		4950	2.20574	1.68821	1.85482	1.85477		4950	2.21487	1.7837	2.02826	1.58615
	4960	2.22203	2.02917	1.90974	1.45265		4960	2.22526	1.80116	2.06038	1.5538		4960	2.22073	1.68538	1.88828	1.85935		4960	2.22366	1.80154	2.03567	1.58109
	4970	2.22759	2.03008	1.91594	1.46021		4970	2.23819	1.79501	2.08357	1.56705		4970	2.22123	1.69742	1.88629	1.85159		4970	2.21482	1.79703	2.01857	1.58332
	4980	2.21297	2.01177	1.90413	1.45656		4980	2.22706	1.76906	2.07065	1.58188		4980	2.20259	1.6922	1.85793	1.84049		4980	2.2126	1.79123	2.01157	1.59255
	4990	2.21316	2.02081	1.90989	1.43693		4990	2.22125	1.77968	2.06575	1.55991		4990	2.21614	1.70718	1.86671	1.85025		4990	2.226	1.79556	2.02576	1.607
	5000	2.20952	2.02645	1.90346	1.42629		5000	2.21368	1.78008	2.05408	1.55333		5000	2.21358	1.71608	1.856	1.84667		5000	2.22063	1.78302	2.02876	1.6023
	5010	2.21167	2.0239	1.90712	1.43169		5010	2.21082	1.78623	2.05686	1.53433		5010	2.20641	1.6944	1.86838	1.83702		5010	2.23231	1.81777	2.03295	1.59036
	5020	2.21108	2.02195	1.90359	1.43729		5020	2.208	1.78728	2.04988	1.5343		5020	2.20618	1.69835	1.86253	1.83875		5020	2.21659	1.80405	2.01698	1.58234
	5030	2.21926	2.03247	1.91096	1.43788		5030	2.22241	1.79686	2.06628	1.54274		5030	2.20245	1.71499	1.83784	1.83922		5030	2.21304	1.79731	2.0053	1.59485
	5040	2.21547	2.02461	1.91682	1.42947		5040	2.23508	1.80764	2.07961	1.54881		5040	2.20644	1.73902	1.82139	1.84258		5040	2.20941	1.77566	2.00087	1.61449
	5050	2.22306	2.02896	1.91462	1.44967		5050	2.21933	1.82528	2.059	1.50989		5050	2.20606	1.75657	1.81859	1.82773		5050	2.21941	1.77455	2.01132	1.63006
	5060	2.21338	2.02261	1.89412	1.45582		5060	2.21604	1.83874	2.05316	1.49174		5060	2.19951	1.75157	1.81612	1.81919		5060	2.20841	1.76619	1.99687	1.62704
	5070	2.20767	2.01841	1.88441	1.45691		5070	2.22573	1.82948	2.06264	1.51865		5070	2.19943	1.7293	1.83022	1.82613		5070	2.22217	1.78938	1.9986	1.63701
	5080	2.19922	2.0045	1.88816	1.44568		5080	2.21562	1.82506	2.0493	1.51243		5080	2.20879	1.73041	1.86404	1.81344		5080	2.22152	1.79717	2.00284	1.62145
	5090	2.1995	2.00751	1.89772	1.42973		5090	2.21135	1.81447	2.05244	1.50841		5090	2.20745	1.73691	1.86272	1.80531		5090	2.21325	1.80477	1.99111	1.60476
	5100	2.20538	2.02042	1.88485	1.4466		5100	2.21916	1.8333	2.05994	1.49833		5100	2.21972	1.73447	1.88738	1.8121		5100	2.22646	1.82594	1.99483	1.6127
	5110	2.23274	2.04628	1.90635	1.4659		5110	2.22693	1.85618	2.06713	1.48326		5110	2.20777	1.71188	1.88658	1.8052		5110	2.2064	1.80756	1.98498	1.59027
	5120	2.21557	2.02427	1.90108	1.45113		5120	2.2002	1.83056	2.03949	1.47354		5120	2.19818	1.6983	1.88816	1.79293		5120	2.2051	1.8161	1.97578	1.5884
	5130	2.20645	2.01977	1.89646	1.43557		5130	2.21545	1.82727	2.05555	1.50073		5130	2.208	1.68484	1.89664	1.8206		5130	2.21079	1.80791	1.97202	1.61794
	5140	2.22147	2.03477	1.90301	1.45192		5140	2.20238	1.81887	2.03867	1.4955		5140	2.19965	1.675	1.89202	1.81427		5140	2.21133	1.80866	1.95711	1.6366
	5150	2.23348	2.04323	1.91464	1.46158		5150	2.19951	1.81673	2.02985	1.50163		5150	2.20846	1.67102	1.90746	1.82316		5150	2.20964	1.80021	1.93601	1.66618
	5160	2.23157	2.04436	1.91732	1.45062		5160	2.2022	1.82764	2.03644	1.48727		5160	2.20726	1.67598	1.90451	1.81877		5160	2.2222	1.79041	1.95177	1.69158
	5170	2.22686	2.04517	1.9055	1.45057		5170	2.21169	1.83552	2.04975	1.48745		5170	2.20516	1.6592	1.91584	1.81717		5170	2.20881	1.78011	1.94187	1.67869
	5180	2.22686	2.04399	1.89611	1.46447		5180	2.21546	1.85636	2.05077	1.47133		5180	2.19915	1.68119	1.89971	1.79923		5180	2.21	1.78296	1.95553	1.66286
	5190	2.23015	2.05058	1.90471	1.45406		5190	2.21167	1.85428	2.05262	1.45991		5190	2.1948	1.68397	1.90894	1.77609		5190	2.21547	1.79257	1.96572	1.65506
	5200	2.23813	2.05009	1.91564	1.4649		5200	2.22326	1.87232	2.06365	1.45655		5200	2.18468	1.65992	1.90599	1.77693		5200	2.21202	1.78186	1.97613	1.64497
	5210	2.23833	2.0549	1.92001	1.45299		5210	2.22668	1.86636	2.07253	1.46204		5210	2.19789	1.68627	1.92017	1.76943		5210	2.2137	1.80188	1.97188	1.63275
	5220	2.22081	2.0427	1.89339	1.45137		5220	2.22839	1.86338	2.0747	1.46792		5220	2.19464	1.70781	1.90174	1.7606		5220	2.20929	1.81359	1.96677	1.61388
	5230	2.24516	2.06615	1.92924	1.44585		5230	2.23827	1.8686	2.08636	1.47484		5230	2.19287	1.71822	1.91206	1.73467		5230	2.22393	1.81361	1.98646	1.6299
	5240	2.22079	2.04894	1.90507	1.427		5240	2.24176	1.85308	2.08695	1.50389		5240	2.20056	1.72784	1.914	1.74244		5240	2.22054	1.82435	1.96996	1.62869
	5250	2.22525	2.06174	1.90481	1.42281		5250	2.23416	1.84481	2.07292	1.51084		5250	2.19468	1.7119	1.90997	1.74776		5250	2.21945	1.83947	1.96028	1.62035
	5260	2.22976	2.06214	1.91603	1.4213		5260	2.24748	1.84879	2.08609	1.52727		5260	2.19604	1.68516	1.92554	1.76003		5260	2.22522	1.83728	1.9719	1.62457
	5270	2.23057	2.07082	1.89395	1.44067		5270	2.22878	1.83196	2.06867	1.51638		5270	2.19939	1.69963	1.9269	1.75298		5270	2.21565	1.83474	1.95294	1.62419
	5280	2.23865	2.07806	1.90208	1.44459		5280	2.22625	1.83531	2.06128	1.51498		5280	2.1868	1.69009	1.91038	1.74879		5280	2.21516	1.82906	1.93834	1.64658
	5290	2.22231	2.05834	1.89739	1.42846		5290	2.23147	1.83973	2.07043	1.5125		5290	2.19871	1.69382	1.92861	1.75502		5290	2.20917	1.82828	1.93177	1.63905
	5300	2.21945	2.06162	1.89352	1.41994		5300	2.23013	1.85762	2.06926	1.48808		5300	2.19808	1.68427	1.94044	1.74958		5300	2.21533	1.83895	1.93242	1.64299
	5310	2.22757	2.07145	1.90036	1.42192		5310	2.24149	1.8739	2.08129	1.48502		5310	2.19225	1.70201	1.90946	1.75187		5310	2.22176	1.83238	1.93407	1.6656
	5320	2.2165	2.05422	1.89203	1.42345		5320	2.21925	1.8688	2.05339	1.46333		5320	2.20072	1.71889	1.91528	1.75028		5320	2.2004	1.80102	1.93153	1.64591
	5330	2.2256	2.06896	1.91368	1.40136		5330	2.22456	1.87855	2.06019	1.4574		5330	2.19897	1.72142	1.91867	1.73964		5330	2.22347	1.80551	1.96718	1.6607
	5340	2.21673	2.04813	1.90093	1.42105		5340	2.22138	1.88934	2.05396	1.44246		5340	2.19612	1.71042	1.92977	1.73099		5340	2.22752	1.79976	1.97932	1.66338
	5350	2.21752	2.05025	1.89362	1.43021		5350	2.2419	1.90091	2.07433	1.46148		5350	2.20179	1.7157	1.94628	1.72166		5350	2.21272	1.78507	1.9676	1.65359
	5360	2.21775	2.05033	1.89483	1.42921		5360	2.23712	1.89049	2.06143	1.47849		5360	2.20729	1.739	1.94115	1.71816		5360	2.22416	1.79403	1.96617	1.67613
	5370	2.21598	2.05718	1.88418	1.42793		5370	2.24786	1.90146	2.06894	1.48651		5370	2.20739	1.74261	1.9509	1.70365		5370	2.21229	1.7788	1.96409	1.66335
	5380	2.21111	2.05959	1.87137	1.4262		5380	2.23367	1.90481	2.05633	1.45663		5380	2.19423	1.73156	1.94274	1.6902		5380	2.218	1.78293	1.95952	1.67943
	5390	2.20985	2.05062	1.88223	1.42094		5390	2.22621	1.89057	2.04295	1.4711		5390	2.20281	1.74125	1.94858	1.69583		5390	2.21739	1.78045	1.96711	1.67157
	5400	2.20323	2.03742	1.86003	1.44832		5400	2.22804	1.88087	2.05226	1.4761		5400	2.19625	1.72506	1.94846	1.69549		5400	2.21045	1.76386	1.96826	1.66941
	5410	2.21194	2.05432	1.86759	1.44127		5410	2.2313	1.8805	2.05295	1.48544		5410	2.20706	1.7195	1.97868	1.69421		5410	2.21588	1.7312	1.99889	1.68155
	5420	2.22053	2.06742	1.87328	1.44156		5420	2.23453	1.86285	2.05309	1.51686		5420	2.20158	1.71825	1.98448	1.67433		5420	2.21856	1.72746	2.00705	1.68275
	5430	2.21431	2.05674	1.8523	1.46464		5430	2.24634	1.85505	2.0661	1.54339		5430	2.20913	1.69916	2.00643	1.68748		5430	2.22145	1.73744	2.00474	1.68286
	5440	2.22345	2.0642	1.86187	1.4697		5440	2.24128	1.83454	2.06936	1.54884		5440	2.19541	1.68361	1.99705	1.67836		5440	2.20693	1.74698	1.98564	1.65722
	5450	2.2331	2.06479	1.85893	1.50151		5450	2.22742	1.82616	2.05091	1.54329		5450	2.18874	1.67999	1.99318	1.66914		5450	2.21311	1.75575	2.00398	1.64228
	5460	2.21294	2.05897	1.83716	1.47636		5460	2.2344	1.80587	2.05471	1.58178		5460	2.18128	1.67157	1.99076	1.66093		5460	2.20965	1.74274	2.00843	1.64141
	5470	2.21857	2.06996	1.84132	1.47271		5470	2.21753	1.77263	2.03748	1.59414		5470	2.19883	1.68152	2.00444	1.6806		5470	2.20862	1.75079	2.00829	1.63019
	5480	2.22282	2.07199	1.85198	1.46933		5480	2.22326	1.78367	2.03793	1.59723		5480	2.20992	1.68316	2.01842	1.69129		5480	2.21107	1.74097	2.00566	1.65046
	5490	2.21708	2.06565	1.83811	1.47828		5490	2.22086	1.80556	2.03572	1.5685		5490	2.19508	1.65821	2.00027	1.69883		5490	2.20096	1.72668	2.00146	1.64352
	5500	2.21606	2.05512	1.85037	1.4746		5500	2.22468	1.80809	2.03736	1.57427		5500	2.19623	1.65606	2.00185	1.70203		5500	2.20117	1.73033	1.99943	1.64271
	5510	2.21908	2.05575	1.86475	1.46464		5510	2.21981	1.80904	2.03737	1.55937		5510	2.19053	1.65788	1.98886	1.70081		5510	2.19988	1.71297	1.99543	1.66221
	5520	2.22467	2.06061	1.8652	1.47417		5520	2.21817	1.80437	2.03323	1.5655		5520	2.20055	1.68262	1.99384	1.69653		5520	2.21286	1.72735	2.00309	1.67254
	5530	2.23409	2.07673	1.86133	1.48491		5530	2.21652	1.80719	2.03438	1.55604		5530	2.19907	1.68804	1.99137	1.69021		5530	2.2093	1.72376	1.99461	1.67694
	5540	2.23016	2.06961	1.86779	1.4749		5540	2.23493	1.81157	2.0572	1.57352		5540	2.20213	1.70128	1.98154	1.69643		5540	2.21956	1.74881	1.99416	1.67865
	5550	2.2252	2.06534	1.84738	1.49151		5550	2.23645	1.8153	2.06228	1.56687		5550	2.205	1.71565	1.9819	1.68898		5550	2.20267	1.7425	1.98342	1.65326
	5560	2.22674	2.07202	1.85205	1.481		5560	2.24124	1.81167	2.06688	1.57865		5560	2.19763	1.69639	1.98509	1.68547		5560	2.21331	1.75309	1.99442	1.65724
	5570	2.22861	2.07712	1.86049	1.46887		5570	2.23276	1.80155	2.05652	1.57974		5570	2.20079	1.71322	1.99597	1.66371		5570	2.21774	1.75952	1.99156	1.6657
	5580	2.22717	2.07903	1.85465	1.46917		5580	2.24325	1.79857	2.07353	1.59058		5580	2.19042	1.71709	1.97596	1.65622		5580	2.20261	1.72785	1.99166	1.65854
	5590	2.23492	2.09572	1.85435	1.4694		5590	2.23574	1.77431	2.061	1.61282		5590	2.18712	1.70251	1.97591	1.66259		5590	2.20848	1.74122	1.98652	1.66633
	5600	2.22758	2.08414	1.849	1.47031		5600	2.22681	1.73155	2.0501	1.64809		5600	2.20311	1.712	1.98453	1.68464		5600	2.22429	1.75868	2.00139	1.67224
	5610	2.22389	2.08968	1.8371	1.46618		5610	2.22275	1.75239	2.04042	1.62697		5610	2.20991	1.71957	1.9775	1.70294		5610	2.21516	1.74742	1.9883	1.67544
	5620	2.23095	2.10382	1.8472	1.45468		5620	2.22066	1.75107	2.04224	1.62039		5620	2.21422	1.72041	1.98289	1.70702		5620	2.20157	1.71993	1.98945	1.66666
	5630	2.24012	2.11521	1.8402	1.47506		5630	2.22659	1.76495	2.04579	1.61712		5630	2.19768	1.70294	1.97374	1.69231		5630	2.21001	1.71486	1.99	1.69334
	5640	2.23663	2.11109	1.84022	1.47034		5640	2.22884	1.76572	2.04648	1.62162		5640	2.21067	1.68582	1.9955	1.7176		5640	2.20686	1.71542	1.99502	1.6786
	5650	2.22267	2.09098	1.82877	1.47102		5650	2.2227	1.76442	2.03504	1.62055		5650	2.20204	1.68576	1.99777	1.69267		5650	2.197	1.70698	1.98477	1.67348
	5660	2.24078	2.1083	1.83857	1.48896		5660	2.22546	1.75589	2.03106	1.64226		5660	2.19521	1.68852	1.99908	1.67048		5660	2.19564	1.7002	1.97758	1.68529
	5670	2.22926	2.09242	1.83895	1.47623		5670	2.23902	1.76666	2.04734	1.64734		5670	2.20799	1.70247	2.01925	1.66572		5670	2.1934	1.68578	1.9812	1.68969
	5680	2.237	2.10387	1.84207	1.47949		5680	2.23666	1.77295	2.03728	1.64665		5680	2.20323	1.69692	2.0196	1.65834		5680	2.21264	1.71797	1.99939	1.68598
	5690	2.22694	2.09628	1.84385	1.45751		5690	2.22446	1.75135	2.03479	1.63977		5690	2.20773	1.68791	2.02929	1.66765		5690	2.21075	1.72204	1.99347	1.68389
	5700	2.22255	2.08969	1.86122	1.43127		5700	2.23911	1.75653	2.04843	1.65702		5700	2.19528	1.66941	2.02109	1.66336		5700	2.20018	1.71817	1.98345	1.67195
	5710	2.21913	2.0847	1.84131	1.4535		5710	2.23219	1.76124	2.04629	1.63588		5710	2.20145	1.67637	2.0298	1.66208		5710	2.20617	1.71693	1.98041	1.69247
	5720	2.21859	2.07973	1.84724	1.45145		5720	2.23001	1.75487	2.05125	1.63055		5720	2.19815	1.68133	2.02577	1.65321		5720	2.20668	1.70626	1.99303	1.68979
	5730	2.23041	2.09107	1.85646	1.4596		5730	2.22948	1.74694	2.04958	1.63969		5730	2.19687	1.6813	2.03173	1.64249		5730	2.21717	1.72764	1.99643	1.69152
	5740	2.21597	2.07754	1.85359	1.43844		5740	2.24488	1.73637	2.06496	1.6733		5740	2.20719	1.68387	2.04464	1.6515		5740	2.20117	1.7177	1.97301	1.68732
	5750	2.22337	2.08559	1.86976	1.42864		5750	2.22057	1.74049	2.03888	1.63571		5750	2.2082	1.68241	2.049	1.65028		5750	2.20523	1.74039	1.95979	1.69008
	5760	2.23692	2.10131	1.87367	1.44275		5760	2.21894	1.74766	2.0357	1.62757		5760	2.20481	1.66386	2.04751	1.66181		5760	2.19402	1.70641	1.93601	1.72265
	5770	2.23324	2.09643	1.86427	1.45059		5770	2.23666	1.77997	2.05162	1.62108		5770	2.20562	1.67425	2.05567	1.64336		5770	2.20561	1.7054	1.95122	1.73601
	5780	2.22941	2.08209	1.87322	1.44791		5780	2.22154	1.76573	2.04036	1.60923		5780	2.2017	1.67191	2.05047	1.64172		5780	2.20898	1.70938	1.95405	1.7375
	5790	2.21817	2.07074	1.86054	1.44602		5790	2.23034	1.75939	2.04854	1.63		5790	2.20494	1.64907	2.05654	1.66575		5790	2.20962	1.72963	1.94196	1.73263
	5800	2.23192	2.08414	1.8673	1.46029		5800	2.21736	1.7347	2.03563	1.63718		5800	2.1837	1.64565	2.03019	1.64537		5800	2.21651	1.73347	1.94724	1.74045
	5810	2.22289	2.06995	1.86152	1.46032		5810	2.22889	1.7327	2.04504	1.65875		5810	2.20226	1.64308	2.05316	1.66876		5810	2.21361	1.72415	1.9533	1.73553
	5820	2.22032	2.06018	1.87153	1.45351		5820	2.24022	1.74161	2.06485	1.6554		5820	2.20955	1.64771	2.05983	1.67523		5820	2.21229	1.73396	1.94326	1.73366
	5830	2.21692	2.06369	1.88163	1.42482		5830	2.22153	1.71618	2.04768	1.65293		5830	2.20828	1.6538	2.05628	1.67023		5830	2.21921	1.72539	1.95971	1.74137
	5840	2.21468	2.0626	1.88044	1.42098		5840	2.22409	1.72582	2.05165	1.64482		5840	2.20734	1.68082	2.04598	1.65333		5840	2.22666	1.72766	1.95891	1.75896
	5850	2.21992	2.06399	1.89383	1.41754		5850	2.22433	1.71929	2.04918	1.65536		5850	2.19579	1.68425	2.02665	1.64286		5850	2.21616	1.71854	1.95655	1.74392
	5860	2.23694	2.08192	1.90551	1.42915		5860	2.22376	1.71819	2.05351	1.64958		5860	2.19205	1.70579	2.02342	1.61437		5860	2.21576	1.72063	1.9632	1.73332
	5870	2.21982	2.06654	1.89044	1.41803		5870	2.22306	1.71994	2.05579	1.64302		5870	2.20898	1.70435	2.03325	1.64932		5870	2.21575	1.75251	1.94866	1.71771
	5880	2.21483	2.06612	1.8861	1.4088		5880	2.21928	1.7239	2.05058	1.63515		5880	2.19035	1.68195	2.02006	1.63878		5880	2.20545	1.75591	1.91832	1.72187
	5890	2.20896	2.06375	1.86934	1.41617		5890	2.23058	1.74772	2.06408	1.6236		5890	2.21817	1.70875	2.04919	1.64971		5890	2.21589	1.73214	1.93905	1.74931
	5900	2.21674	2.06624	1.88111	1.42125		5900	2.24006	1.76796	2.07473	1.61416		5900	2.19045	1.67566	2.02324	1.64159		5900	2.21744	1.72826	1.9495	1.74546
	5910	2.22522	2.07548	1.88283	1.43198		5910	2.22528	1.7557	2.0599	1.60563		5910	2.20773	1.69583	2.03977	1.64672		5910	2.19991	1.735	1.92306	1.7236
	5920	2.23156	2.08067	1.90344	1.41683		5920	2.2351	1.76416	2.06487	1.61722		5920	2.20612	1.70696	2.03426	1.6377		5920	2.20923	1.77155	1.90542	1.72985
	5930	2.22378	2.07544	1.89885	1.40615		5930	2.23474	1.7472	2.06327	1.63656		5930	2.18887	1.70061	2.00377	1.63559		5930	2.21194	1.75496	1.91813	1.7396
	5940	2.23101	2.08279	1.91844	1.39152		5940	2.2385	1.75126	2.06678	1.63807		5940	2.20019	1.70883	2.01237	1.64681		5940	2.20438	1.75729	1.90712	1.73014
	5950	2.22457	2.08098	1.92474	1.36467		5950	2.23126	1.75024	2.05863	1.62966		5950	2.20578	1.714	2.01596	1.65198		5950	2.20735	1.74973	1.90516	1.74744
	5960	2.2304	2.07802	1.92293	1.39052		5960	2.24266	1.75815	2.07342	1.63366		5960	2.19386	1.70309	2.00926	1.63965		5960	2.21933	1.7497	1.92593	1.75504
	5970	2.24363	2.09079	1.9565	1.36692		5970	2.23342	1.75824	2.0659	1.6177		5970	2.19965	1.70652	2.02215	1.63573		5970	2.21622	1.72987	1.92065	1.77254
	5980	2.23262	2.077	1.93609	1.38088		5980	2.2435	1.79332	2.07657	1.59325		5980	2.19575	1.70194	2.01635	1.63718		5980	2.20853	1.71753	1.92331	1.76244
	5990	2.2169	2.06061	1.92911	1.36444		5990	2.23937	1.78812	2.07107	1.59464		5990	2.19813	1.69969	2.01717	1.64488		5990	2.20736	1.72456	1.93674	1.73776
	6000	2.21623	2.05808	1.93598	1.35633		6000	2.23829	1.78729	2.07117	1.59241		6000	2.2031	1.71527	2.02067	1.6377		6000	2.20276	1.7239	1.9437	1.71887
	6010	2.23558	2.07628	1.94654	1.37683		6010	2.23387	1.77566	2.07428	1.58892		6010	2.19838	1.70126	2.02042	1.63993		6010	2.21175	1.72931	1.9466	1.73318
	6020	2.21636	2.05108	1.91666	1.39427		6020	2.24852	1.7762	2.08903	1.61019		6020	2.20602	1.69834	2.03135	1.64994		6020	2.20375	1.70453	1.94145	1.74309
	6030	2.22414	2.06115	1.91355	1.40839		6030	2.25366	1.7805	2.09675	1.60981		6030	2.19466	1.70857	2.01586	1.62791		6030	2.19911	1.71107	1.94009	1.72639
	6040	2.23907	2.08461	1.92383	1.40718		6040	2.25395	1.79709	2.09706	1.59167		6040	2.20462	1.71357	2.03209	1.62941		6040	2.23417	1.75351	1.95996	1.75122
	6050	2.22691	2.0717	1.91616	1.39808		6050	2.25938	1.79889	2.09751	1.60437		6050	2.1882	1.71811	2.02398	1.58998		6050	2.21465	1.75993	1.94247	1.7143
	6060	2.23598	2.07367	1.91769	1.42183		6060	2.25393	1.78419	2.09171	1.61303		6060	2.20094	1.74593	2.01982	1.60012		6060	2.22048	1.7731	1.94206	1.71629
	6070	2.2265	2.0582	1.90866	1.42668		6070	2.23255	1.75817	2.06324	1.6188		6070	2.19456	1.73812	2.01942	1.59155		6070	2.20967	1.75424	1.92669	1.72506
	6080	2.22639	2.06271	1.89942	1.43215		6080	2.23262	1.75668	2.06469	1.61874		6080	2.18375	1.74175	2.00248	1.57922		6080	2.21247	1.7648	1.94462	1.70117
	6090	2.2201	2.05281	1.88492	1.44593		6090	2.2441	1.77627	2.0713	1.62067		6090	2.19183	1.75927	2.00111	1.5839		6090	2.2073	1.75045	1.95281	1.69315
	6100	2.22982	2.06053	1.90142	1.44328		6100	2.241	1.78458	2.07183	1.60218		6100	2.19738	1.75093	2.00886	1.59866		6100	2.20461	1.74288	1.9419	1.70646
	6110	2.22263	2.0416	1.8944	1.45715		6110	2.25077	1.79106	2.08173	1.60948		6110	2.19439	1.74919	2.01705	1.58196		6110	2.20932	1.73984	1.95214	1.71006
	6120	2.22067	2.03336	1.88715	1.47202		6120	2.23293	1.76853	2.06245	1.60951		6120	2.19811	1.73875	2.01776	1.60275		6120	2.205	1.73834	1.94934	1.70362
	6130	2.23494	2.04745	1.87712	1.50808		6130	2.23086	1.786	2.05745	1.59078		6130	2.20012	1.72968	2.02284	1.61166		6130	2.22115	1.73478	1.96742	1.72823
	6140	2.2199	2.04065	1.86305	1.4902		6140	2.24996	1.79367	2.0771	1.61029		6140	2.19889	1.72885	2.02032	1.61233		6140	2.20852	1.74815	1.94218	1.71086
	6150	2.22069	2.04895	1.86475	1.47901		6150	2.23608	1.80554	2.06058	1.57928		6150	2.21106	1.74092	2.0319	1.61806		6150	2.20841	1.71694	1.95295	1.72982
	6160	2.21546	2.03906	1.86371	1.4783		6160	2.23045	1.79342	2.05195	1.58839		6160	2.19227	1.74154	2.01084	1.59237		6160	2.20639	1.70795	1.94538	1.74204
	6170	2.22361	2.0451	1.86792	1.48905		6170	2.23967	1.78742	2.06164	1.60842		6170	2.19254	1.74532	1.99569	1.60796		6170	2.2119	1.72038	1.9545	1.73355
	6180	2.22424	2.04938	1.8537	1.50278		6180	2.2335	1.78095	2.0632	1.5964		6180	2.19375	1.75925	1.98765	1.60605		6180	2.19743	1.72048	1.93198	1.72185
	6190	2.23289	2.05836	1.85457	1.51504		6190	2.23674	1.79805	2.0589	1.59185		6190	2.19324	1.76005	1.98609	1.60571		6190	2.21652	1.73667	1.94917	1.73511
	6200	2.22543	2.05536	1.85481	1.49674		6200	2.24996	1.79621	2.0748	1.61043		6200	2.19808	1.7548	1.99553	1.61296		6200	2.21291	1.70536	1.95086	1.75494
	6210	2.22209	2.05872	1.85657	1.47994		6210	2.23955	1.77054	2.06624	1.62081		6210	2.19694	1.74968	1.99467	1.61647		6210	2.21313	1.70375	1.95245	1.75529
	6220	2.24378	2.082	1.88225	1.48038		6220	2.24301	1.78625	2.065	1.61471		6220	2.19826	1.77264	1.97916	1.61412		6220	2.21142	1.70282	1.95245	1.75188
	6230	2.22751	2.06522	1.88286	1.45372		6230	2.22997	1.77496	2.04995	1.61019		6230	2.19559	1.77417	1.97456	1.6108		6230	2.20871	1.69818	1.95377	1.74808
	6240	2.22147	2.06072	1.87758	1.44845		6240	2.24462	1.78383	2.06065	1.62735		6240	2.1922	1.75303	1.98119	1.61656		6240	2.21838	1.67556	1.97304	1.77257
	6250	2.23045	2.07306	1.87788	1.45802		6250	2.23598	1.76023	2.04507	1.64877		6250	2.1968	1.74647	1.99621	1.61768		6250	2.21466	1.66156	1.96994	1.77988
	6260	2.22687	2.06935	1.8804	1.44907		6260	2.24212	1.75363	2.05443	1.66081		6260	2.18562	1.72499	1.98696	1.62181		6260	2.21803	1.67472	1.96925	1.77671
	6270	2.22709	2.06356	1.88782	1.44836		6270	2.22549	1.73115	2.03015	1.66948		6270	2.19185	1.74092	1.98853	1.61968		6270	2.21014	1.68106	1.95727	1.76424
	6280	2.21016	2.04796	1.87006	1.44164		6280	2.23341	1.74606	2.03691	1.66687		6280	2.20219	1.72914	1.99698	1.64966		6280	2.21879	1.67002	1.96526	1.78741
	6290	2.21823	2.05542	1.86239	1.46556		6290	2.22856	1.75318	2.02608	1.65961		6290	2.19904	1.73619	1.9844	1.64907		6290	2.21913	1.6919	1.96416	1.7688
	6300	2.22536	2.05222	1.86418	1.48917		6300	2.22932	1.77037	2.03244	1.63545		6300	2.19294	1.74726	1.95657	1.65434		6300	2.20426	1.67767	1.94495	1.76639
	6310	2.2339	2.06539	1.87581	1.48194		6310	2.2366	1.76564	2.04083	1.64994		6310	2.19962	1.75842	1.96516	1.65007		6310	2.19917	1.67031	1.93897	1.76725
	6320	2.21811	2.04731	1.85118	1.49054		6320	2.23335	1.78856	2.03415	1.62451		6320	2.19846	1.77439	1.96516	1.62977		6320	2.19567	1.64573	1.95402	1.76504
	6330	2.21822	2.04779	1.85189	1.48933		6330	2.23177	1.79207	2.02782	1.6242		6330	2.19257	1.76105	1.96203	1.63214		6330	2.21484	1.64658	1.96721	1.7972
	6340	2.22186	2.05146	1.86071	1.4841		6340	2.23477	1.81252	2.03259	1.60368		6340	2.19152	1.76706	1.96352	1.62098		6340	2.20745	1.63948	1.97113	1.78113
	6350	2.23153	2.06986	1.85445	1.49537		6350	2.22645	1.7837	2.02349	1.62421		6350	2.19286	1.7751	1.96571	1.61316		6350	2.20392	1.66222	1.94781	1.77695
	6360	2.23923	2.08739	1.85577	1.49238		6360	2.23032	1.78377	2.02818	1.62889		6360	2.1977	1.78787	1.97771	1.59748		6360	2.21388	1.66072	1.95181	1.79861
	6370	2.23788	2.09009	1.85053	1.49105		6370	2.23318	1.79703	2.03894	1.6086		6370	2.19997	1.81076	1.961	1.59855		6370	2.211	1.63413	1.95023	1.8175
	6380	2.23061	2.08263	1.84157	1.4908		6380	2.23464	1.78128	2.0388	1.63021		6380	2.18484	1.78074	1.95122	1.60273		6380	2.21941	1.64225	1.96905	1.81036
	6390	2.22333	2.07794	1.8402	1.47724		6390	2.22174	1.76891	2.0216	1.62983		6390	2.19707	1.79114	1.9654	1.60727		6390	2.20271	1.63583	1.95436	1.79121
	6400	2.23041	2.09094	1.84638	1.47252		6400	2.2293	1.80413	2.0331	1.59724		6400	2.20272	1.79345	1.97634	1.60674		6400	2.21855	1.65732	1.96894	1.79458
	6410	2.23668	2.10694	1.86364	1.44676		6410	2.23277	1.81267	2.03561	1.59406		6410	2.19089	1.77947	1.96583	1.60281		6410	2.21219	1.67375	1.95989	1.7734
	6420	2.23535	2.10921	1.8565	1.44851		6420	2.23286	1.80447	2.03699	1.60186		6420	2.20645	1.78767	1.98526	1.61241		6420	2.20857	1.6732	1.96064	1.76405
	6430	2.22248	2.10056	1.83813	1.44491		6430	2.2344	1.81043	2.04386	1.59061		6430	2.20509	1.79125	1.98647	1.60319		6430	2.21003	1.66368	1.97221	1.76381
	6440	2.21401	2.0958	1.83114	1.43466		6440	2.2309	1.80928	2.03875	1.58867		6440	2.21057	1.82214	1.99127	1.5773		6440	2.21979	1.66494	1.98624	1.77137
	6450	2.2098	2.09319	1.83677	1.41818		6450	2.22198	1.81164	2.03171	1.56988		6450	2.20611	1.80421	1.9955	1.58008		6450	2.20653	1.65951	1.97863	1.75173
	6460	2.2301	2.11265	1.85775	1.42552		6460	2.2246	1.83268	2.02908	1.55621		6460	2.19231	1.77945	1.98065	1.5884		6460	2.21339	1.65854	1.97463	1.77434
	6470	2.23722	2.12206	1.86275	1.42736		6470	2.22815	1.81627	2.03806	1.57379		6470	2.19926	1.77288	1.98318	1.61164		6470	2.20644	1.64895	1.96951	1.77164
	6480	2.22992	2.11363	1.86376	1.41563		6480	2.2306	1.80309	2.03973	1.59358		6480	2.20216	1.7669	1.98153	1.62808		6480	2.21035	1.66871	1.97154	1.76062
	6490	2.24182	2.12577	1.87136	1.42499		6490	2.23621	1.8177	2.04545	1.58537		6490	2.19881	1.78553	1.96628	1.61715		6490	2.213	1.68695	1.97896	1.74145
	6500	2.21796	2.09528	1.8544	1.41764		6500	2.23583	1.81489	2.03866	1.5962		6500	2.19725	1.76621	1.96301	1.63797		6500	2.20182	1.68331	1.97686	1.71886
	6510	2.21871	2.09563	1.85999	1.41212		6510	2.23329	1.79683	2.03395	1.61544		6510	2.20053	1.75214	1.97394	1.6487		6510	2.21316	1.69019	1.98684	1.72971
	6520	2.20387	2.08371	1.84177	1.40716		6520	2.24188	1.81177	2.05235	1.59919		6520	2.20105	1.7576	1.99037	1.62434		6520	2.21768	1.68073	1.98297	1.75475
	6530	2.23078	2.11249	1.8712	1.41024		6530	2.22061	1.81635	2.02494	1.5693		6530	2.21366	1.77381	2.00782	1.61951		6530	2.2163	1.69136	1.98861	1.73456
	6540	2.21705	2.09654	1.85547	1.41151		6540	2.2298	1.80846	2.03952	1.58551		6540	2.21392	1.77108	2.00641	1.62495		6540	2.19581	1.69586	1.97102	1.69772
	6550	2.21476	2.09903	1.85282	1.40409		6550	2.23606	1.82228	2.04192	1.58423		6550	2.20183	1.78127	1.9988	1.58997		6550	2.20895	1.687	1.97598	1.73449
	6560	2.22162	2.10503	1.86702	1.39793		6560	2.22147	1.80791	2.02552	1.58069		6560	2.20853	1.79496	2.01383	1.5741		6560	2.21065	1.70186	1.97644	1.72375
	6570	2.21574	2.09582	1.88161	1.37336		6570	2.21859	1.81334	2.02199	1.57088		6570	2.20215	1.79295	2.00167	1.57403		6570	2.21665	1.73689	1.97066	1.7108
	6580	2.21365	2.09366	1.88476	1.36554		6580	2.23747	1.83691	2.04334	1.56944		6580	2.20587	1.78515	2.01197	1.58018		6580	2.20792	1.7273	1.95888	1.71146
	6590	2.21951	2.09428	1.88486	1.38338		6590	2.23214	1.85074	2.04308	1.53802		6590	2.20535	1.79431	2.01194	1.56835		6590	2.20874	1.75462	1.94515	1.70141
	6600	2.22402	2.09823	1.90003	1.37109		6600	2.2354	1.84377	2.04788	1.54943		6600	2.2096	1.78654	2.01992	1.57888		6600	2.21816	1.77167	1.96159	1.68933
	6610	2.21677	2.09106	1.90241	1.35518		6610	2.2394	1.83987	2.05227	1.55977		6610	2.20517	1.78258	2.01463	1.57773		6610	2.20752	1.75245	1.96195	1.68106
	6620	2.21681	2.09186	1.89443	1.3652		6620	2.24554	1.83677	2.05724	1.57447		6620	2.2083	1.80904	2.01179	1.55989		6620	2.2238	1.76385	1.97882	1.69223
	6630	2.2146	2.08628	1.89506	1.3657		6630	2.24143	1.84495	2.05038	1.56208		6630	2.20471	1.80872	1.99952	1.56586		6630	2.2133	1.75222	1.97095	1.68598
	6640	2.21934	2.09492	1.90696	1.35119		6640	2.22936	1.8295	2.03657	1.56376		6640	2.19951	1.80127	1.99696	1.56309		6640	2.20776	1.7495	1.96257	1.68405
	6650	2.21613	2.08951	1.90794	1.34765		6650	2.2378	1.84605	2.04771	1.55386		6650	2.22172	1.82636	2.01409	1.57478		6650	2.21016	1.76275	1.95535	1.68492
	6660	2.22747	2.10033	1.92111	1.34951		6660	2.22556	1.82525	2.0299	1.56659		6660	2.20486	1.82731	1.99032	1.55641		6660	2.22733	1.76702	1.96958	1.70891
	6670	2.22131	2.09677	1.90562	1.3567		6670	2.23565	1.84294	2.0409	1.56031		6670	2.21283	1.83154	1.99639	1.56625		6670	2.21631	1.75832	1.95223	1.70914
	6680	2.21675	2.08877	1.89916	1.36315		6680	2.24021	1.8489	2.04503	1.56093		6680	2.19486	1.82645	1.97093	1.55381		6680	2.21939	1.73839	1.97484	1.71153
	6690	2.21853	2.09417	1.89961	1.36001		6690	2.23083	1.85297	2.03245	1.54559		6690	2.20366	1.82671	1.98281	1.56326		6690	2.2224	1.72784	1.99502	1.70663
	6700	2.221	2.09255	1.9103	1.35562		6700	2.23662	1.87679	2.03744	1.52689		6700	2.1947	1.80578	1.97872	1.56755		6700	2.22142	1.74592	1.98404	1.69846
	6710	2.22207	2.08829	1.91242	1.36269		6710	2.23428	1.85492	2.03285	1.55267		6710	2.20488	1.8175	1.99375	1.56352		6710	2.22915	1.75686	1.99157	1.69862
	6720	2.21298	2.07733	1.90715	1.35721		6720	2.23117	1.85628	2.03119	1.54425		6720	2.20381	1.80701	1.98869	1.57905		6720	2.22588	1.74679	1.99906	1.69161
	6730	2.22398	2.09578	1.92187	1.34399		6730	2.22467	1.86742	2.02422	1.52106		6730	2.20796	1.79828	1.99416	1.59364		6730	2.22831	1.74447	2.00578	1.69244
	6740	2.21147	2.07786	1.90851	1.34954		6740	2.21314	1.86347	2.01	1.51107		6740	2.2011	1.80651	1.97481	1.58945		6740	2.2107	1.73235	1.98864	1.67889
	6750	2.22069	2.0892	1.91798	1.34892		6750	2.22301	1.87741	2.02202	1.50674		6750	2.20629	1.81509	1.98396	1.58264		6750	2.21798	1.72368	2.00295	1.68996
	6760	2.23544	2.1085	1.9315	1.3483		6760	2.23975	1.89077	2.04293	1.51142		6760	2.20669	1.80989	1.99052	1.58149		6760	2.2018	1.67651	2.00528	1.69235
	6770	2.2264	2.0886	1.9224	1.36229		6770	2.24204	1.88196	2.04429	1.52729		6770	2.20751	1.80805	1.99785	1.57663		6770	2.21259	1.67252	2.02812	1.6972
	6780	2.21795	2.0777	1.91893	1.35629		6780	2.23676	1.90109	2.04054	1.49273		6780	2.20198	1.78531	1.99504	1.59056		6780	2.22687	1.68511	2.04589	1.70076
	6790	2.23079	2.09077	1.93239	1.3592		6790	2.23534	1.8962	2.03653	1.50014		6790	2.20582	1.78455	2.00265	1.59251		6790	2.20483	1.6876	2.02245	1.66861
	6800	2.23417	2.09225	1.93055	1.37058		6800	2.23537	1.89651	2.03444	1.5027		6800	2.22043	1.78664	2.01549	1.61442		6800	2.20607	1.69894	2.02437	1.65803
	6810	2.22664	2.0767	1.93754	1.35982		6810	2.24558	1.88488	2.04452	1.53376		6810	2.20856	1.78874	2.0067	1.59031		6810	2.2096	1.70846	2.03084	1.64969
	6820	2.23003	2.08281	1.93081	1.37111		6820	2.23164	1.86343	2.02918	1.53964		6820	2.21242	1.78415	2.01045	1.6014		6820	2.20478	1.70513	2.03176	1.63907
	6830	2.20828	2.06491	1.91607	1.34827		6830	2.23756	1.8831	2.03663	1.52296		6830	2.20352	1.76531	1.9998	1.61106		6830	2.21366	1.71569	2.0424	1.63877
	6840	2.20689	2.05887	1.92054	1.34661		6840	2.25354	1.89888	2.05532	1.52538		6840	2.20203	1.75404	2.0037	1.61444		6840	2.20226	1.69892	2.02464	1.64754
	6850	2.20716	2.05838	1.92258	1.34532		6850	2.22869	1.86505	2.03095	1.52675		6850	2.20571	1.76576	2.00941	1.60458		6850	2.21793	1.72943	2.03757	1.64188
	6860	2.21048	2.05726	1.91474	1.3689		6860	2.22856	1.85424	2.02736	1.5442		6860	2.19859	1.76267	1.98719	1.61605		6860	2.22496	1.72479	2.04279	1.65922
	6870	2.21342	2.0592	1.91615	1.3735		6870	2.23532	1.87117	2.03889	1.52805		6870	2.19776	1.76583	1.98561	1.61231		6870	2.21308	1.6933	2.03595	1.66825
	6880	2.20743	2.05047	1.9051	1.38263		6880	2.23382	1.86186	2.03636	1.53838		6880	2.2032	1.77381	1.99373	1.60836		6880	2.22788	1.7038	2.04353	1.68759
	6890	2.22221	2.06019	1.91248	1.40515		6890	2.23377	1.85859	2.03349	1.54597		6890	2.20252	1.75104	1.99924	1.62452		6890	2.2163	1.66898	2.04118	1.69471
	6900	2.22582	2.06478	1.90095	1.42535		6900	2.23832	1.85215	2.03993	1.55831		6900	2.20602	1.76222	2.00626	1.61324		6900	2.20521	1.68804	2.02943	1.66068
	6910	2.20929	2.05361	1.88706	1.4084		6910	2.23574	1.84184	2.03327	1.57177		6910	2.20125	1.78924	2.00053	1.57717		6910	2.22545	1.70276	2.05486	1.66836
	6920	2.22396	2.06475	1.91285	1.40351		6920	2.21392	1.82281	2.0123	1.55915		6920	2.20842	1.78412	2.01374	1.58619		6920	2.21235	1.68564	2.03524	1.67493
	6930	2.22275	2.06436	1.90292	1.41368		6930	2.22946	1.83834	2.02591	1.56753		6930	2.20744	1.79271	2.0177	1.56865		6930	2.20643	1.68835	2.03335	1.65881
	6940	2.22641	2.0704	1.89201	1.43093		6940	2.22541	1.8488	2.02582	1.54366		6940	2.21209	1.79765	2.02676	1.56441		6940	2.20528	1.70518	2.02957	1.64308
	6950	2.23535	2.08469	1.90294	1.42354		6950	2.23727	1.84713	2.03512	1.56752		6950	2.20081	1.78559	2.01784	1.55791		6950	2.20226	1.71566	2.01827	1.63798
	6960	2.21956	2.07001	1.88797	1.41545		6960	2.23911	1.85127	2.04253	1.55823		6960	2.1883	1.79953	1.99683	1.53353		6960	2.20946	1.72108	2.01029	1.66135
	6970	2.2171	2.06991	1.87818	1.42088		6970	2.2255	1.82893	2.02743	1.56533		6970	2.19649	1.81525	1.99325	1.54304		6970	2.20686	1.71603	2.01256	1.65689
	6980	2.21732	2.06558	1.90147	1.39672		6980	2.21643	1.81408	2.01995	1.56656		6980	2.19958	1.83091	1.99255	1.53421		6980	2.20386	1.70955	2.01451	1.65323
	6990	2.22239	2.07127	1.91773	1.3821		6990	2.22032	1.80891	2.01878	1.58493		6990	2.19785	1.84001	2.00303	1.50442		6990	2.21621	1.73101	2.02066	1.65641
	7000	2.2228	2.07705	1.91605	1.37708		7000	2.20733	1.80654	2.00429	1.56966		7000	2.19956	1.83937	2.0059	1.50638		7000	2.21456	1.73123	2.01966	1.653
	7010	2.22085	2.06788	1.91653	1.38387		7010	2.22995	1.83026	2.02626	1.57789		7010	2.18392	1.81914	1.98576	1.51211		7010	2.2127	1.73116	2.01077	1.65889
	7020	2.213	2.05098	1.90608	1.39824		7020	2.22417	1.81489	2.02729	1.57803		7020	2.19963	1.83727	2.00054	1.51626		7020	2.216	1.72604	2.02026	1.66152
	7030	2.20866	2.05138	1.89708	1.39616		7030	2.2226	1.80637	2.02336	1.58837		7030	2.18639	1.82913	1.98713	1.50541		7030	2.22259	1.72148	2.04004	1.6597
	7040	2.21215	2.05648	1.89327	1.40485		7040	2.22051	1.81729	2.02202	1.57171		7040	2.18809	1.84569	1.98219	1.4966		7040	2.22215	1.71535	2.04225	1.66214
	7050	2.19803	2.05211	1.89111	1.36939		7050	2.22618	1.80908	2.02941	1.58761		7050	2.19252	1.84572	1.98486	1.50597		7050	2.21378	1.68552	2.04294	1.66945
	7060	2.2172	2.0632	1.91933	1.37526		7060	2.22128	1.81432	2.01691	1.58382		7060	2.19516	1.83562	1.98579	1.52467		7060	2.21405	1.68029	2.03683	1.68285
	7070	2.22446	2.06715	1.91771	1.39488		7070	2.22013	1.81719	2.01767	1.57632		7070	2.19262	1.82531	1.9883	1.52646		7070	2.21304	1.67574	2.03876	1.68239
	7080	2.21036	2.05382	1.90663	1.38489		7080	2.21121	1.82763	2.00826	1.551		7080	2.18658	1.82184	1.97614	1.52906		7080	2.20737	1.65513	2.04174	1.68429
	7090	2.20421	2.03524	1.90788	1.39099		7090	2.22227	1.83734	2.02363	1.55115		7090	2.19384	1.82369	1.98711	1.53343		7090	2.20888	1.63508	2.05029	1.6974
	7100	2.22078	2.05221	1.92417	1.39635		7100	2.21559	1.83729	2.02107	1.53535		7100	2.20213	1.8223	1.99337	1.55062		7100	2.20988	1.63878	2.05336	1.69269
	7110	2.22958	2.06068	1.9256	1.40988		7110	2.22316	1.82724	2.02825	1.55958		7110	2.19999	1.83152	1.99486	1.53167		7110	2.208	1.64828	2.04878	1.6841
	7120	2.23172	2.06464	1.93393	1.39942		7120	2.22592	1.82963	2.02975	1.56269		7120	2.20362	1.84959	1.9926	1.52332		7120	2.22107	1.65689	2.06009	1.69619
	7130	2.24133	2.07165	1.9505	1.39677		7130	2.21511	1.80797	2.01655	1.57422		7130	2.18748	1.8411	1.97566	1.50906		7130	2.21536	1.66641	2.05934	1.67267
	7140	2.23329	2.0541	1.94303	1.40729		7140	2.23485	1.83193	2.04003	1.57207		7140	2.19083	1.85295	1.98049	1.49792		7140	2.21482	1.65832	2.05565	1.68379
	7150	2.21573	2.03337	1.92926	1.40081		7150	2.23258	1.84874	2.03983	1.54599		7150	2.20144	1.84191	1.99649	1.52119		7150	2.20247	1.62698	2.03795	1.70336
	7160	2.23298	2.0486	1.95275	1.40084		7160	2.25099	1.87647	2.06405	1.53376		7160	2.21183	1.86758	2.01534	1.49495		7160	2.21796	1.65215	2.05281	1.70149
	7170	2.22709	2.05687	1.94287	1.38362		7170	2.24741	1.87455	2.06369	1.52608		7170	2.20376	1.84	2.01431	1.50668		7170	2.22088	1.65866	2.04816	1.70837
	7180	2.21996	2.05085	1.9283	1.39001		7180	2.23307	1.8648	2.04635	1.51927		7180	2.20089	1.82732	2.0122	1.51651		7180	2.20903	1.64695	2.0351	1.70457
	7190	2.22588	2.05585	1.94046	1.38461		7190	2.22837	1.86147	2.04464	1.51184		7190	2.21807	1.85133	2.02173	1.52474		7190	2.20488	1.68505	2.02772	1.66492
	7200	2.23016	2.04803	1.95311	1.39218		7200	2.22839	1.83922	2.04238	1.54188		7200	2.19883	1.83419	2.00375	1.51343		7200	2.20084	1.68496	2.01646	1.668
	7210	2.21749	2.02851	1.93845	1.40075		7210	2.23438	1.838	2.04929	1.55146		7210	2.20397	1.84553	2.01251	1.50294		7210	2.20627	1.69059	2.01244	1.68145
	7220	2.22742	2.04755	1.95256	1.38484		7220	2.2271	1.82894	2.04171	1.55125		7220	2.19416	1.84141	1.99896	1.49733		7220	2.21319	1.69839	2.02209	1.68019
	7230	2.22398	2.02934	1.9421	1.415		7230	2.23872	1.84712	2.05558	1.54483		7230	2.19747	1.84762	2.00151	1.496		7230	2.20838	1.68078	2.02662	1.67978
	7240	2.22597	2.02685	1.95437	1.40792		7240	2.22067	1.82349	2.0369	1.54554		7240	2.20623	1.86064	2.01751	1.4841		7240	2.21004	1.66028	2.03618	1.69294
	7250	2.22305	2.01885	1.96414	1.39655		7250	2.22181	1.82166	2.03788	1.54967		7250	2.21147	1.87259	2.02576	1.4734		7250	2.21645	1.66131	2.0462	1.69659
	7260	2.23617	2.03516	1.96328	1.41582		7260	2.22308	1.81588	2.04099	1.55598		7260	2.18952	1.8665	1.99794	1.45341		7260	2.22881	1.67381	2.06212	1.69742
	7270	2.21376	2.02027	1.94194	1.396		7270	2.22591	1.81879	2.04541	1.55487		7270	2.20345	1.87737	2.01436	1.45884		7270	2.21415	1.65834	2.04756	1.69184
	7280	2.23242	2.03921	1.95737	1.40631		7280	2.22827	1.82731	2.04889	1.54706		7280	2.21617	1.87726	2.0332	1.47133		7280	2.21101	1.6497	2.05196	1.68674
	7290	2.22506	2.03391	1.9586	1.38884		7290	2.24174	1.82984	2.06981	1.55511		7290	2.21899	1.86751	2.03217	1.49351		7290	2.21746	1.66136	2.0517	1.69252
	7300	2.22691	2.03884	1.9613	1.38372		7300	2.23598	1.82821	2.06362	1.54866		7300	2.20279	1.86587	2.01791	1.46668		7300	2.22153	1.6718	2.0642	1.67768
	7310	2.22208	2.03244	1.95829	1.38185		7310	2.21846	1.79909	2.04497	1.55709		7310	2.19625	1.84483	2.00973	1.48478		7310	2.22037	1.66394	2.07345	1.671
	7320	2.2195	2.03277	1.95369	1.37959		7320	2.22866	1.81524	2.05485	1.55446		7320	2.20541	1.83743	2.02271	1.50338		7320	2.22589	1.67008	2.09042	1.65834
	7330	2.21778	2.03188	1.95276	1.37668		7330	2.23082	1.81454	2.05223	1.56491		7330	2.19857	1.81964	2.01776	1.51163		7330	2.20672	1.64423	2.07149	1.6567
	7340	2.21608	2.02506	1.94654	1.39001		7340	2.2203	1.79214	2.04272	1.57322		7340	2.21167	1.83315	2.03706	1.50761		7340	2.21117	1.64685	2.07038	1.66731
	7350	2.2198	2.02328	1.95249	1.39613		7350	2.22614	1.77762	2.05587	1.58899		7350	2.20673	1.83762	2.03417	1.49153		7350	2.21158	1.65125	2.06628	1.66915
	7360	2.2127	2.0037	1.95517	1.39808		7360	2.22526	1.77366	2.04926	1.59945		7360	2.21034	1.8523	2.03827	1.47838		7360	2.2144	1.62632	2.07311	1.69246
	7370	2.20557	1.98574	1.95266	1.40465		7370	2.22421	1.75831	2.05025	1.61215		7370	2.21221	1.86641	2.03024	1.47729		7370	2.21813	1.63295	2.0705	1.69903
	7380	2.215	1.97811	1.9641	1.42892		7380	2.23284	1.75874	2.06097	1.62185		7380	2.21029	1.85989	2.02769	1.48325		7380	2.20621	1.60481	2.05988	1.7077
	7390	2.21511	1.96748	1.98033	1.42154		7390	2.22651	1.74317	2.05595	1.62761		7390	2.19972	1.84233	2.01115	1.49621		7390	2.22513	1.59967	2.08518	1.73074
	7400	2.20669	1.95908	1.98092	1.40602		7400	2.22825	1.73216	2.0527	1.64808		7400	2.19601	1.84917	2.00722	1.48207		7400	2.2175	1.60245	2.07986	1.71492
	7410	2.21076	1.9751	1.97311	1.40738		7410	2.23193	1.74931	2.05693	1.63461		7410	2.20432	1.86149	2.01853	1.47595		7410	2.21883	1.60348	2.08569	1.71031
	7420	2.21548	1.97116	1.983	1.41384		7420	2.23103	1.75395	2.0594	1.62404		7420	2.21278	1.86025	2.02862	1.48897		7420	2.20792	1.58777	2.07597	1.70856
	7430	2.20998	1.97785	1.96855	1.40745		7430	2.22229	1.7349	2.05381	1.62762		7430	2.18694	1.83765	2.00285	1.4755		7430	2.21199	1.58894	2.0728	1.72178
	7440	2.20012	1.97838	1.96462	1.38106		7440	2.21875	1.72024	2.05371	1.63364		7440	2.20791	1.87693	2.02524	1.45783		7440	2.20645	1.58401	2.06601	1.72028
	7450	2.2003	1.96098	1.96505	1.40562		7450	2.21169	1.70064	2.04293	1.64844		7450	2.18343	1.85581	1.99701	1.45006		7450	2.21136	1.56005	2.06922	1.75066
	7460	2.22428	1.96901	1.99686	1.4249		7460	2.2314	1.71606	2.06431	1.65894		7460	2.19617	1.85339	2.00773	1.47656		7460	2.20157	1.58277	2.05563	1.72136
	7470	2.22099	1.96632	1.98737	1.43162		7470	2.22965	1.72246	2.06014	1.65278		7470	2.19701	1.84089	2.01777	1.48103		7470	2.21882	1.58786	2.06706	1.74709
	7480	2.23825	1.98242	2.00676	1.43613		7480	2.22025	1.70923	2.04911	1.6549		7480	2.21396	1.84175	2.03733	1.50349		7480	2.21364	1.58583	2.05896	1.74534
	7490	2.23851	1.97983	2.00779	1.43905		7490	2.23377	1.7181	2.0688	1.65761		7490	2.21914	1.84547	2.04465	1.50426		7490	2.21822	1.59749	2.06355	1.74092
	7500	2.24037	1.97204	2.01366	1.44733		7500	2.23444	1.70578	2.06725	1.67399		7500	2.20232	1.84457	2.03481	1.46886		7500	2.21501	1.6081	2.05384	1.73444
	7510	2.23669	1.96279	2.01629	1.44485		7510	2.2215	1.69659	2.04837	1.6721		7510	2.20414	1.85088	2.03432	1.46705		7510	2.22808	1.62442	2.0665	1.73767
	7520	2.2308	1.94036	2.00994	1.46562		7520	2.22905	1.69935	2.0591	1.6762		7520	2.20894	1.84175	2.04553	1.47736		7520	2.21521	1.60499	2.05343	1.7383
	7530	2.2403	1.95581	2.01602	1.46572		7530	2.24014	1.72717	2.07326	1.65982		7530	2.21428	1.84662	2.05459	1.4747		7530	2.2198	1.62788	2.04596	1.73754
	7540	2.22324	1.94425	2.00279	1.44716		7540	2.2264	1.71482	2.0561	1.65698		7540	2.21509	1.8532	2.04722	1.47911		7540	2.216	1.61839	2.04844	1.73378
	7550	2.22874	1.95702	2.01297	1.43268		7550	2.25083	1.7265	2.08748	1.67156		7550	2.21655	1.85648	2.04989	1.47569		7550	2.21397	1.62461	2.04763	1.72372
	7560	2.23188	1.95341	2.01539	1.44394		7560	2.2468	1.71076	2.08094	1.685		7560	2.21714	1.86745	2.05048	1.46272		7560	2.21563	1.63262	2.03809	1.73169
	7570	2.22127	1.93866	2.00269	1.44875		7570	2.24134	1.72323	2.07476	1.66523		7570	2.21505	1.87441	2.0495	1.44882		7570	2.22497	1.63477	2.05477	1.7339
	7580	2.22744	1.94272	2.01265	1.44845		7580	2.23249	1.71706	2.06758	1.65674		7580	2.21676	1.87841	2.05479	1.44133		7580	2.22726	1.62777	2.05891	1.74146
	7590	2.2341	1.94535	2.01872	1.45698		7590	2.21572	1.70258	2.04509	1.65459		7590	2.21654	1.87405	2.05549	1.44532		7590	2.22306	1.61823	2.05335	1.74616
	7600	2.21877	1.9349	1.99898	1.45125		7600	2.21251	1.72696	2.04379	1.622		7600	2.21613	1.88131	2.05793	1.43111		7600	2.2226	1.60134	2.04787	1.76688
	7610	2.21997	1.93184	2.00059	1.45677		7610	2.21038	1.73447	2.03741	1.6162		7610	2.21817	1.87112	2.06033	1.44723		7610	2.21434	1.58257	2.04371	1.76786
	7620	2.22074	1.93108	1.99158	1.47236		7620	2.2131	1.75367	2.04177	1.59733		7620	2.20725	1.84078	2.05381	1.46193		7620	2.20969	1.5747	2.04393	1.763
	7630	2.22344	1.94133	1.98317	1.47839		7630	2.21489	1.74677	2.041	1.61076		7630	2.22072	1.86492	2.07109	1.4477		7630	2.21737	1.55849	2.05499	1.78369
	7640	2.22818	1.94422	1.99149	1.47768		7640	2.21785	1.73329	2.0472	1.62554		7640	2.21688	1.85198	2.06976	1.45445		7640	2.20969	1.53737	2.05684	1.78083
	7650	2.23782	1.95034	1.99815	1.48971		7650	2.21621	1.73843	2.04278	1.62114		7650	2.21664	1.85139	2.0658	1.46006		7650	2.20809	1.51702	2.05651	1.79464
	7660	2.22997	1.94194	1.99356	1.48327		7660	2.24274	1.74578	2.07749	1.64196		7660	2.20604	1.84025	2.05268	1.46056		7660	2.21124	1.52208	2.05379	1.80122
	7670	2.23051	1.93273	1.99541	1.49439		7670	2.2182	1.72976	2.05179	1.62445		7670	2.20583	1.85174	2.05438	1.4429		7670	2.21713	1.53378	2.0569	1.80222
	7680	2.21954	1.91261	1.98489	1.50163		7680	2.21089	1.7153	2.03884	1.63612		7680	2.21049	1.8558	2.06598	1.43535		7680	2.19679	1.50377	2.03733	1.79992
	7690	2.22599	1.92699	1.99231	1.49246		7690	2.21114	1.68421	2.04523	1.66094		7690	2.20933	1.85448	2.06708	1.43191		7690	2.2044	1.50311	2.04832	1.8066
	7700	2.22197	1.91621	1.98419	1.50512		7700	2.21918	1.71472	2.04862	1.64694		7700	2.21207	1.85128	2.06573	1.44636		7700	2.2055	1.50067	2.0435	1.81674
	7710	2.22371	1.91219	1.99347	1.50312		7710	2.22036	1.72968	2.05066	1.63189		7710	2.20393	1.83917	2.06012	1.44497		7710	2.21174	1.49653	2.0536	1.82393
	7720	2.22574	1.90711	2.00112	1.50541		7720	2.22788	1.73028	2.05547	1.64562		7720	2.22794	1.84952	2.08528	1.46913		7720	2.20585	1.51302	2.04936	1.80068
	7730	2.22252	1.89908	1.99266	1.51722		7730	2.22246	1.74341	2.04825	1.62598		7730	2.20898	1.8365	2.06237	1.4605		7730	2.21181	1.52079	2.04854	1.80968
	7740	2.21705	1.90084	1.98732	1.50598		7740	2.21359	1.73627	2.03313	1.62841		7740	2.19274	1.82719	2.04345	1.44981		7740	2.20693	1.54584	2.03379	1.79307
	7750	2.22334	1.91392	1.99516	1.49758		7750	2.22925	1.74633	2.05313	1.63528		7750	2.19853	1.84327	2.04692	1.44207		7750	2.21639	1.558	2.05452	1.78223
	7760	2.22492	1.89648	2.00362	1.51307		7760	2.21909	1.72709	2.03787	1.64711		7760	2.2064	1.8564	2.05308	1.44051		7760	2.20948	1.54601	2.04479	1.78671
	7770	2.22633	1.90838	2.00269	1.50345		7770	2.2188	1.71737	2.03977	1.65413		7770	2.19926	1.85156	2.04591	1.43509		7770	2.20403	1.55244	2.04042	1.77259
	7780	2.23451	1.92333	2.00833	1.50118		7780	2.21958	1.72595	2.03819	1.64922		7780	2.21059	1.86611	2.05517	1.43782		7780	2.20964	1.56017	2.04183	1.77815
	7790	2.22997	1.91458	1.99796	1.51262		7790	2.22156	1.72035	2.04227	1.65534		7790	2.21597	1.89072	2.05665	1.41999		7790	2.22266	1.56623	2.0531	1.79224
	7800	2.22069	1.90321	1.98298	1.51937		7800	2.21986	1.72937	2.03984	1.64435		7800	2.20367	1.88535	2.04137	1.41087		7800	2.22603	1.58813	2.05964	1.77373
	7810	2.24109	1.92187	2.00503	1.52683		7810	2.21698	1.72066	2.03655	1.64979		7810	2.19859	1.87512	2.03315	1.42052		7810	2.20849	1.58978	2.04016	1.75078
	7820	2.23482	1.92742	2.0008	1.50688		7820	2.20867	1.69611	2.02749	1.664		7820	2.2006	1.87513	2.03413	1.4253		7820	2.20994	1.5795	2.04381	1.75946
	7830	2.2348	1.93881	1.99093	1.50528		7830	2.20849	1.70203	2.02985	1.65458		7830	2.20896	1.88719	2.04446	1.42046		7830	2.2198	1.5804	2.05052	1.77559
	7840	2.22768	1.93668	1.98649	1.49273		7840	2.22212	1.70121	2.04038	1.67881		7840	2.2121	1.88681	2.04587	1.42869		7840	2.21212	1.5661	2.03572	1.78609
	7850	2.23427	1.9593	1.99699	1.46871		7850	2.21911	1.71427	2.03666	1.66198		7850	2.20491	1.88403	2.04197	1.41562		7850	2.21154	1.55015	2.03745	1.79658
	7860	2.2273	1.9586	1.99148	1.45588		7860	2.22878	1.73997	2.04334	1.65294		7860	2.21949	1.8791	2.06199	1.43855		7860	2.21787	1.54784	2.05031	1.79953
	7870	2.22171	1.96232	1.96616	1.46817		7870	2.21914	1.73422	2.03253	1.64636		7870	2.21178	1.86589	2.05168	1.44672		7870	2.21644	1.53946	2.04585	1.80824
	7880	2.21743	1.95167	1.96606	1.46957		7880	2.21805	1.71319	2.03376	1.66383		7880	2.20461	1.84319	2.04431	1.46426		7880	2.21172	1.54305	2.04517	1.79436
	7890	2.23265	1.96406	1.98398	1.47504		7890	2.22575	1.68047	2.04171	1.70744		7890	2.21106	1.85278	2.05035	1.46316		7890	2.20847	1.56388	2.04111	1.7728
	7900	2.23453	1.9639	1.97904	1.48753		7900	2.22081	1.69331	2.03457	1.69034		7900	2.19545	1.83915	2.03272	1.45794		7900	2.20379	1.58275	2.02348	1.76461
	7910	2.22716	1.94689	1.97344	1.4952		7910	2.22028	1.71592	2.02957	1.67204		7910	2.20539	1.84143	2.04608	1.46634		7910	2.20264	1.59862	2.01974	1.75166
	7920	2.20925	1.9365	1.96435	1.46727		7920	2.23694	1.73401	2.04312	1.68127		7920	2.20077	1.83422	2.04252	1.46646		7920	2.20598	1.60265	2.033	1.74102
	7930	2.2146	1.9422	1.96745	1.4717		7930	2.22613	1.73047	2.03293	1.66854		7930	2.2107	1.85147	2.06032	1.44967		7930	2.21464	1.62449	2.04864	1.72434
	7940	2.21651	1.9481	1.96151	1.47758		7940	2.22655	1.73599	2.02784	1.67009		7940	2.20424	1.84827	2.0526	1.44503		7940	2.20989	1.62024	2.04725	1.71779
	7950	2.22253	1.95001	1.97566	1.47429		7950	2.21119	1.73548	2.01475	1.64548		7950	2.21125	1.83038	2.06427	1.47232		7950	2.21638	1.6294	2.05024	1.72229
	7960	2.2248	1.94972	1.98956	1.46277		7960	2.20422	1.74038	2.00074	1.63869		7960	2.21449	1.82113	2.06792	1.48831		7960	2.22064	1.62296	2.0608	1.72672
	7970	2.23209	1.9523	2.00507	1.46036		7970	2.20886	1.7293	2.0083	1.6536		7970	2.21351	1.82519	2.06703	1.48166		7970	2.21181	1.62633	2.04837	1.71564
	7980	2.22545	1.94967	2.00021	1.45024		7980	2.21414	1.73522	2.01384	1.65479		7980	2.20297	1.81347	2.05214	1.48535		7980	2.21673	1.62326	2.05989	1.71746
	7990	2.23369	1.94678	2.00645	1.4707		7990	2.21392	1.72615	2.01302	1.66463		7990	2.20017	1.80612	2.04936	1.48981		7990	2.20748	1.6305	2.04362	1.70618
	8000	2.22947	1.93933	1.99338	1.48543		8000	2.2073	1.74362	2.00607	1.63702		8000	2.21126	1.83127	2.06216	1.4742		8000	2.21476	1.64132	2.04749	1.71001
	8010	2.23357	1.93498	2.00516	1.48756		8010	2.19901	1.7131	1.99242	1.66339		8010	2.20409	1.82766	2.05391	1.46873		8010	2.21396	1.64208	2.04902	1.70538
	8020	2.2123	1.91765	1.9759	1.48559		8020	2.20196	1.70283	1.9966	1.67667		8020	2.2021	1.8125	2.05639	1.47805		8020	2.2065	1.60927	2.05521	1.70985
	8030	2.21342	1.90324	1.97406	1.50972		8030	2.19638	1.70704	1.98786	1.66811		8030	2.21171	1.82397	2.06551	1.47991		8030	2.20941	1.60989	2.06342	1.70692
	8040	2.20668	1.89314	1.97374	1.50307		8040	2.21585	1.72209	2.01067	1.67678		8040	2.19818	1.8122	2.04667	1.4802		8040	2.22162	1.62067	2.07802	1.71068
	8050	2.21666	1.89649	1.9859	1.51217		8050	2.21542	1.71565	2.01379	1.67849		8050	2.21287	1.82651	2.05889	1.48945		8050	2.21228	1.5965	2.0685	1.72072
	8060	2.2198	1.92391	1.98986	1.48125		8060	2.20447	1.73078	1.99896	1.65163		8060	2.20364	1.82782	2.04281	1.48259		8060	2.21073	1.58093	2.06413	1.73628
	8070	2.21875	1.94187	1.98571	1.46005		8070	2.21549	1.71872	2.0167	1.67205		8070	2.2051	1.83973	2.04832	1.46446		8070	2.20557	1.57865	2.05491	1.73617
	8080	2.22193	1.94183	1.99297	1.4599		8080	2.20869	1.71573	2.01177	1.66302		8080	2.2118	1.84844	2.06036	1.45681		8080	2.21731	1.58454	2.06541	1.7482
	8090	2.21381	1.94947	1.98118	1.44097		8090	2.19517	1.73952	1.9979	1.61865		8090	2.21683	1.84403	2.06531	1.47062		8090	2.20723	1.58717	2.05331	1.7345
	8100	2.23382	1.96489	1.99764	1.45894		8100	2.20963	1.73691	2.00815	1.64785		8100	2.21139	1.83302	2.05292	1.48528		8100	2.20534	1.61657	2.04185	1.71598
	8110	2.22977	1.96867	1.99009	1.45178		8110	2.2224	1.74463	2.02229	1.65672		8110	2.20215	1.81053	2.04375	1.498		8110	2.20846	1.62673	2.04098	1.71543
	8120	2.22936	1.96029	1.98324	1.4711		8120	2.21228	1.72924	2.00785	1.66331		8120	2.21103	1.8026	2.05799	1.51416		8120	2.20867	1.63951	2.038	1.70733
	8130	2.23829	1.96626	1.9946	1.47488		8130	2.21196	1.75072	2.01252	1.63409		8130	2.21706	1.81964	2.05934	1.50954		8130	2.21636	1.6492	2.04549	1.70897
	8140	2.22746	1.97602	1.97792	1.45134		8140	2.22376	1.73828	2.0286	1.65933		8140	2.18892	1.7962	2.02583	1.5008		8140	2.21389	1.64283	2.03751	1.71823
	8150	2.21216	1.95563	1.96299	1.45241		8150	2.22311	1.75493	2.02249	1.64748		8150	2.20345	1.80699	2.03353	1.51985		8150	2.22571	1.64756	2.04491	1.73536
	8160	2.22122	1.97018	1.98019	1.43697		8160	2.22111	1.75427	2.01895	1.64713		8160	2.19704	1.79956	2.02581	1.52043		8160	2.21492	1.63631	2.03622	1.7286
	8170	2.22846	1.96454	1.99411	1.44783		8170	2.21888	1.74659	2.01711	1.65152		8170	2.20627	1.80598	2.03497	1.52729		8170	2.22425	1.62972	2.04291	1.75073
	8180	2.23212	1.96945	2.00947	1.43109		8180	2.22942	1.75122	2.02627	1.66375		8180	2.22031	1.80496	2.05306	1.54487		8180	2.22196	1.63897	2.04049	1.73909
	8190	2.23492	1.98073	2.00792	1.42645		8190	2.22763	1.74945	2.0274	1.65944		8190	2.21928	1.7919	2.05125	1.55946		8190	2.22464	1.6454	2.04049	1.73986
	8200	2.23701	1.9967	2.00938	1.40855		8200	2.22549	1.74475	2.02653	1.6597		8200	2.20944	1.77754	2.03484	1.56939		8200	2.22821	1.65958	2.03397	1.74316
	8210	2.23356	1.99709	2.00479	1.40359		8210	2.22424	1.74785	2.02194	1.6587		8210	2.20625	1.77824	2.02895	1.56724		8210	2.23002	1.64653	2.04113	1.75176
	8220	2.25137	2.00592	2.01755	1.4294		8220	2.22469	1.7397	2.02528	1.66439		8220	2.20077	1.76823	2.03201	1.55918		8220	2.24575	1.66634	2.04787	1.76531
	8230	2.23283	1.9933	2.00333	1.40871		8230	2.21586	1.74054	2.00818	1.66066		8230	2.20825	1.77106	2.03405	1.57439		8230	2.21888	1.67557	2.00886	1.73315
	8240	2.23211	1.99331	2.00599	1.40262		8240	2.21393	1.74963	2.00106	1.65456		8240	2.20734	1.77177	2.01963	1.58955		8240	2.23426	1.70654	2.0174	1.73254
	8250	2.23353	1.97635	2.01017	1.42499		8250	2.20112	1.75743	1.98548	1.63071		8250	2.19776	1.7482	2.01139	1.59951		8250	2.22068	1.67507	2.01156	1.73511
	8260	2.22895	1.9782	2.00188	1.41973		8260	2.20568	1.7611	1.99357	1.6292		8260	2.1994	1.74138	2.01756	1.60368		8260	2.20388	1.67678	1.98478	1.7214
	8270	2.22843	1.97538	2.00293	1.42055		8270	2.20645	1.76468	1.99505	1.62559		8270	2.2047	1.75328	2.02468	1.59626		8270	2.21085	1.71266	1.96883	1.72227
	8280	2.23339	1.98479	2.01317	1.40847		8280	2.21447	1.79382	2.00136	1.60765		8280	2.2064	1.76246	2.03517	1.5774		8280	2.22914	1.73515	2.00266	1.70784
	8290	2.22796	1.97196	2.01002	1.41378		8290	2.22529	1.79769	2.01491	1.61626		8290	2.21805	1.78921	2.04326	1.56949		8290	2.223	1.73095	1.98607	1.71545
	8300	2.24761	1.99851	2.03909	1.397		8300	2.21431	1.78077	2.00046	1.62276		8300	2.21711	1.7743	2.03894	1.58926		8300	2.21605	1.72058	1.97562	1.71996
	8310	2.23155	1.98707	2.0187	1.39142		8310	2.22573	1.81409	2.01055	1.60453		8310	2.20456	1.75579	2.03014	1.58616		8310	2.22331	1.72207	1.98362	1.72799
	8320	2.22382	1.99282	2.00701	1.37527		8320	2.20645	1.79886	1.98886	1.59544		8320	2.20973	1.75888	2.03288	1.59359		8320	2.22724	1.70763	1.9941	1.74033
	8330	2.23149	2.00135	2.01648	1.37387		8330	2.21588	1.82131	1.99997	1.58214		8330	2.20067	1.73849	2.02988	1.59472		8330	2.22726	1.72174	1.9864	1.73527
	8340	2.23156	1.99647	2.02079	1.37485		8340	2.20214	1.82263	1.97872	1.56892		8340	2.18849	1.72636	2.01067	1.5987		8340	2.22233	1.69655	1.99582	1.73665
	8350	2.22685	1.98751	2.01522	1.38074		8350	2.21298	1.84362	1.9911	1.55921		8350	2.20363	1.71418	2.0323	1.62582		8350	2.21664	1.69727	1.97629	1.74371
	8360	2.23327	1.99728	2.01878	1.38215		8360	2.20507	1.833	1.98468	1.55751		8360	2.19019	1.70321	2.02192	1.61392		8360	2.22457	1.71186	1.97667	1.74921
	8370	2.22394	1.99057	2.01748	1.36354		8370	2.21339	1.84273	1.99348	1.55838		8370	2.19876	1.70102	2.02555	1.63487		8370	2.22705	1.70854	1.98708	1.74696
	8380	2.22974	1.9928	2.02151	1.37321		8380	2.21911	1.84773	2.00168	1.55822		8380	2.22247	1.71804	2.04251	1.6599		8380	2.21074	1.6918	1.96466	1.74718
	8390	2.2255	1.99834	2.0177	1.35692		8390	2.2177	1.8438	1.99863	1.56278		8390	2.20351	1.69983	2.02512	1.64936		8390	2.21386	1.68674	1.97937	1.74336
	8400	2.23263	2.01225	2.02262	1.35244		8400	2.21421	1.85376	1.9913	1.55039		8400	2.20336	1.69418	2.023	1.65735		8400	2.21888	1.68635	1.96666	1.77069
	8410	2.22314	2.00132	2.01522	1.34844		8410	2.21316	1.85015	1.992	1.55082		8410	2.19874	1.68985	2.02524	1.64673		8410	2.2192	1.69453	1.95771	1.7736
	8420	2.22893	2.01658	2.02523	1.32972		8420	2.21501	1.86538	1.99641	1.53208		8420	2.2038	1.68358	2.03571	1.65375		8420	2.21822	1.71859	1.94606	1.76076
	8430	2.22118	2.00291	2.01707	1.33682		8430	2.21612	1.86148	2.00028	1.53499		8430	2.19319	1.68654	2.02499	1.63559		8430	2.21958	1.73485	1.93068	1.76517
	8440	2.23842	2.01974	2.03906	1.33564		8440	2.22028	1.86686	2.00214	1.53803		8440	2.20359	1.69675	2.04341	1.63007		8440	2.21993	1.72713	1.92426	1.78057
	8450	2.24135	2.01992	2.04142	1.34159		8450	2.22715	1.84172	2.01061	1.57666		8450	2.20434	1.68248	2.04655	1.6429		8450	2.21912	1.71221	1.92031	1.79714
	8460	2.23238	2.01234	2.02858	1.34253		8460	2.21368	1.83393	1.99362	1.56938		8460	2.19864	1.65748	2.04234	1.6582		8460	2.21688	1.71392	1.91652	1.79403
	8470	2.23011	2.01355	2.02545	1.33788		8470	2.21517	1.84063	1.99754	1.56072		8470	2.2011	1.64706	2.03379	1.68539		8470	2.21283	1.69313	1.92016	1.79987
	8480	2.23216	2.00901	2.03373	1.33901		8480	2.21824	1.85194	1.99532	1.55889		8480	2.20097	1.65468	2.02632	1.68659		8480	2.22014	1.70334	1.93313	1.79434
	8490	2.23427	2.0101	2.03933	1.33587		8490	2.22713	1.85203	2.00546	1.5711		8490	2.20212	1.64747	2.02219	1.70154		8490	2.21159	1.69137	1.92526	1.79301
	8500	2.23133	2.0138	2.03375	1.32895		8500	2.21585	1.8479	1.98959	1.56423		8500	2.21228	1.65174	2.03538	1.70801		8500	2.21767	1.6818	1.94316	1.79772
	8510	2.22827	2.01344	2.02673	1.32997		8510	2.21405	1.84317	1.99022	1.56389		8510	2.20824	1.67351	2.02912	1.68366		8510	2.2192	1.65739	1.96873	1.79634
	8520	2.23809	2.012	2.04318	1.33991		8520	2.20525	1.83271	1.9791	1.56542		8520	2.20291	1.68452	2.0184	1.67154		8520	2.21702	1.66674	1.97194	1.77871
	8530	2.2321	2.0138	2.03451	1.33038		8530	2.22374	1.84696	1.99942	1.57515		8530	2.20497	1.67304	2.02602	1.67926		8530	2.21463	1.66646	1.9588	1.7875
	8540	2.22449	2.00462	2.02691	1.33036		8540	2.22601	1.86801	1.99715	1.55955		8540	2.21074	1.6751	2.03018	1.68735		8540	2.21549	1.66847	1.96106	1.78529
	8550	2.24317	2.02062	2.04534	1.34066		8550	2.21114	1.86927	1.97805	1.53994		8550	2.21479	1.67625	2.03009	1.69691		8550	2.21485	1.67028	1.95976	1.78343
	8560	2.22873	2.00832	2.02867	1.33626		8560	2.21553	1.85638	1.9806	1.56468		8560	2.21644	1.67501	2.02333	1.71045		8560	2.21294	1.65902	1.94193	1.80852
	8570	2.23322	2.0044	2.03352	1.34971		8570	2.2196	1.86358	1.98265	1.56505		8570	2.20823	1.66137	2.01799	1.70883		8570	2.20484	1.64895	1.92821	1.81262
	8580	2.23812	2.00172	2.04147	1.3579		8580	2.22311	1.86217	1.99301	1.56354		8580	2.21069	1.65701	2.01672	1.72089		8580	2.22117	1.66941	1.93186	1.8298
	8590	2.23839	2.0015	2.03849	1.36358		8590	2.21039	1.85575	1.97058	1.56355		8590	2.20374	1.6626	2.01531	1.6992		8590	2.20878	1.65049	1.93616	1.81233
	8600	2.25141	2.0101	2.05507	1.3689		8600	2.22162	1.859	1.99099	1.56565		8600	2.19894	1.64841	2.01317	1.7031		8600	2.21251	1.66691	1.92726	1.81591
	8610	2.23437	1.98463	2.03761	1.37628		8610	2.21561	1.85708	1.9797	1.56522		8610	2.20301	1.65119	2.01253	1.71165		8610	2.22006	1.68627	1.95249	1.78931
	8620	2.24265	1.99822	2.0439	1.37426		8620	2.2152	1.87294	1.98128	1.54298		8620	2.20251	1.65797	2.01812	1.69718		8620	2.22376	1.68651	1.96542	1.78409
	8630	2.25033	2.00248	2.05039	1.38344		8630	2.21751	1.86423	1.98504	1.5553		8630	2.20082	1.67792	2.00472	1.68904		8630	2.21386	1.66156	1.96776	1.78031
	8640	2.24286	1.99873	2.03987	1.38016		8640	2.20847	1.86903	1.97712	1.53376		8640	2.18953	1.67355	1.98017	1.69299		8640	2.21232	1.69881	1.94799	1.76298
	8650	2.24241	2.00107	2.0422	1.37184		8650	2.20982	1.89261	1.97796	1.50743		8650	2.19333	1.67081	1.98888	1.69533		8650	2.22062	1.68417	1.96479	1.77917
	8660	2.25487	2.00115	2.05458	1.39389		8660	2.22254	1.90984	1.99815	1.49641		8660	2.20438	1.7105	1.99229	1.68034		8660	2.20336	1.66763	1.95384	1.76382
	8670	2.24404	1.98612	2.04427	1.39559		8670	2.22325	1.90427	1.99937	1.50399		8670	2.20998	1.71003	1.99756	1.68925		8670	2.20624	1.67791	1.95708	1.75767
	8680	2.24287	1.98829	2.04533	1.3872		8680	2.22422	1.9012	1.99974	1.51023		8680	2.19837	1.71186	1.99605	1.6586		8680	2.20296	1.67459	1.95469	1.75528
	8690	2.24425	1.99216	2.0469	1.38377		8690	2.21997	1.9012	1.98985	1.51079		8690	2.18911	1.70137	1.98038	1.66368		8690	2.19787	1.67103	1.94921	1.75201
	8700	2.23362	1.99405	2.03879	1.35837		8700	2.22658	1.90424	1.99695	1.51702		8700	2.19258	1.71669	1.97834	1.65949		8700	2.20542	1.68944	1.95982	1.74144
	8710	2.22636	1.98451	2.02844	1.36402		8710	2.2298	1.91089	2.00017	1.51389		8710	2.1984	1.70717	1.98349	1.67848		8710	2.20872	1.67949	1.95955	1.75963
	8720	2.22326	1.99004	2.01786	1.3615		8720	2.22611	1.90099	2.00104	1.51433		8720	2.20638	1.70306	1.99385	1.69126		8720	2.2095	1.67008	1.95786	1.7724
	8730	2.22502	1.99761	2.02178	1.35033		8730	2.22344	1.91837	1.99268	1.49547		8730	2.20181	1.71711	1.98034	1.681		8730	2.21083	1.65013	1.96753	1.78367
	8740	2.2349	2.01692	2.03572	1.33319		8740	2.22353	1.93002	2.00108	1.46931		8740	2.20434	1.72465	1.9903	1.66809		8740	2.22488	1.68141	1.97195	1.78449
	8750	2.24196	2.02667	2.0426	1.3316		8750	2.21474	1.90896	1.98369	1.49366		8750	2.20685	1.70466	2.00065	1.68281		8750	2.2217	1.68562	1.98151	1.76187
	8760	2.23571	2.0243	2.02919	1.33469		8760	2.22074	1.90551	1.99098	1.50612		8760	2.2026	1.68908	1.99485	1.69426		8760	2.22423	1.69862	1.9752	1.76285
	8770	2.23185	2.02317	2.02905	1.32364		8770	2.22021	1.91596	1.98557	1.49841		8770	2.20589	1.67822	2.00731	1.69888		8770	2.21116	1.71177	1.9603	1.73365
	8780	2.22576	2.03302	2.02322	1.29671		8780	2.2149	1.92828	1.98716	1.46439		8780	2.20646	1.65907	2.00897	1.7171		8780	2.213	1.70468	1.96505	1.73993
	8790	2.23341	2.03352	2.02557	1.31839		8790	2.21987	1.93481	1.99538	1.45967		8790	2.20127	1.65038	2.00553	1.71618		8790	2.21487	1.70546	1.95751	1.75237
	8800	2.24125	2.03962	2.03759	1.31705		8800	2.21762	1.92929	1.99487	1.46083		8800	2.18967	1.63145	1.99866	1.71261		8800	2.21762	1.72453	1.94868	1.75052
	8810	2.23926	2.02842	2.03666	1.32895		8810	2.22239	1.92614	1.99945	1.47318		8810	2.19256	1.64861	2.00099	1.70082		8810	2.22297	1.73394	1.94763	1.75596
	8820	2.2246	2.01793	2.0225	1.31724		8820	2.21077	1.898	1.98029	1.50035		8820	2.20215	1.64363	2.00918	1.72063		8820	2.22068	1.71815	1.94671	1.76667
	8830	2.23088	2.02031	2.03538	1.31502		8830	2.22574	1.90801	1.9981	1.50829		8830	2.19546	1.64239	1.99972	1.71575		8830	2.22281	1.72462	1.94082	1.7722
	8840	2.23655	2.03542	2.03978	1.30411		8840	2.23134	1.9027	2.00089	1.52771		8840	2.20195	1.64494	2.01596	1.71092		8840	2.22866	1.7218	1.94867	1.781
	8850	2.21881	1.99791	2.01684	1.33676		8850	2.22993	1.88881	1.99501	1.5484		8850	2.21122	1.66295	2.01809	1.7149		8850	2.22754	1.74501	1.95205	1.75165
	8860	2.23655	2.01277	2.03879	1.34028		8860	2.22877	1.89614	1.98787	1.54528		8860	2.21153	1.67061	2.02257	1.70295		8860	2.22929	1.72592	1.9569	1.76954
	8870	2.22349	1.99746	2.02412	1.34196		8870	2.23032	1.90829	1.99143	1.53013		8870	2.2145	1.66514	2.03022	1.70691		8870	2.2323	1.70839	1.96967	1.77993
	8880	2.21513	1.98869	2.01817	1.33628		8880	2.22555	1.90057	1.98833	1.52987		8880	2.19229	1.64728	2.00459	1.69716		8880	2.22518	1.69178	1.95744	1.79141
	8890	2.23162	2.0047	2.03799	1.33718		8890	2.23274	1.89802	1.99291	1.54792		8890	2.18774	1.65841	2.0034	1.67586		8890	2.22954	1.69725	1.95955	1.79477
	8900	2.22446	1.9951	2.03439	1.33315		8900	2.22301	1.89793	1.97396	1.54429		8900	2.20173	1.6683	2.02412	1.67778		8900	2.23393	1.68875	1.96179	1.8112
	8910	2.22157	1.9917	2.02603	1.3413		8910	2.22646	1.89659	1.98222	1.5453		8910	2.20334	1.65672	2.03875	1.67576		8910	2.21938	1.69161	1.93955	1.79663
	8920	2.22344	1.99354	2.03163	1.33629		8920	2.22544	1.90562	1.98317	1.52997		8920	2.2003	1.66346	2.03533	1.66523		8920	2.22167	1.69889	1.95105	1.78292
	8930	2.22372	1.99894	2.03053	1.33082		8930	2.23338	1.91038	1.99484	1.532		8930	2.20461	1.65597	2.04309	1.67457		8930	2.21348	1.70303	1.94783	1.76202
	8940	2.2335	2.0113	2.03616	1.33631		8940	2.22267	1.91411	1.97577	1.52088		8940	2.20587	1.66677	2.04247	1.66791		8940	2.21347	1.70491	1.94213	1.76643
	8950	2.24296	2.01257	2.04274	1.35591		8950	2.2327	1.91111	1.98175	1.54603		8950	2.20131	1.65716	2.04155	1.66656		8950	2.21883	1.70196	1.94701	1.77733
	8960	2.22913	2.00655	2.02609	1.34415		8960	2.24064	1.9158	1.99701	1.54358		8960	2.20609	1.64844	2.04649	1.68173		8960	2.21768	1.69416	1.94134	1.78808
	8970	2.23377	2.0294	2.02761	1.32279		8970	2.23989	1.91578	1.99427	1.54495		8970	2.2109	1.65311	2.04574	1.69066		8970	2.21889	1.6896	1.94042	1.79637
	8980	2.22327	2.01857	2.02053	1.31482		8980	2.23573	1.90385	1.98877	1.55471		8980	2.21261	1.65534	2.04589	1.69277		8980	2.20965	1.68595	1.93146	1.78665
	8990	2.23332	2.02789	2.02767	1.32351		8990	2.22573	1.91883	1.96928	1.53224		8990	2.20524	1.63998	2.03464	1.70201		8990	2.23199	1.69007	1.96481	1.80188
	9000	2.22855	2.0121	2.02451	1.33629		9000	2.23671	1.92473	1.97589	1.54823		9000	2.20074	1.63865	2.02763	1.70002		9000	2.22759	1.66997	1.97555	1.79799
	9010	2.2319	2.00966	2.0332	1.33796		9010	2.23452	1.91138	1.97298	1.56211		9010	2.18984	1.62242	2.01935	1.69728		9010	2.2229	1.67256	1.97308	1.78664
	9020	2.24053	2.01239	2.03592	1.3584		9020	2.22837	1.90141	1.97426	1.55507		9020	2.19988	1.61919	2.03221	1.71093		9020	2.2293	1.67181	1.98784	1.78691
	9030	2.2349	1.99376	2.02917	1.37731		9030	2.23204	1.91876	1.98123	1.53528		9030	2.19414	1.6237	2.01769	1.7091		9030	2.22338	1.66367	1.96678	1.80301
	9040	2.23106	1.96912	2.02682	1.40351		9040	2.23694	1.92502	1.99432	1.52471		9040	2.20735	1.64635	2.02985	1.70706		9040	2.22025	1.66643	1.95988	1.80024
	9050	2.2409	1.97527	2.04065	1.40618		9050	2.23118	1.91619	1.9936	1.51989		9050	2.20049	1.64788	2.01926	1.7004		9050	2.22805	1.69134	1.95326	1.80348
	9060	2.24044	1.97575	2.04889	1.39198		9060	2.23592	1.93143	1.99532	1.51227		9060	2.20629	1.66264	2.02212	1.69767		9060	2.22803	1.71092	1.94158	1.79756
	9070	2.22904	1.95855	2.03907	1.39411		9070	2.23837	1.94307	1.99983	1.49859		9070	2.2061	1.67568	2.01919	1.68782		9070	2.2276	1.71777	1.93578	1.79622
	9080	2.23028	1.96553	2.04287	1.38263		9080	2.21958	1.93037	1.98248	1.48206		9080	2.20496	1.64107	2.02107	1.71635		9080	2.21685	1.72243	1.91646	1.78585
	9090	2.23635	1.97436	2.04916	1.38036		9090	2.23749	1.93996	2.00334	1.49529		9090	2.2048	1.63001	2.01828	1.7297		9090	2.2212	1.72448	1.91223	1.79916
	9100	2.24128	1.99068	2.05792	1.35972		9100	2.24767	1.95325	2.02056	1.48532		9100	2.20741	1.64481	2.01842	1.72219		9100	2.21954	1.75892	1.90534	1.76879
	9110	2.23671	1.98751	2.05117	1.35952		9110	2.24072	1.93594	2.00471	1.50829		9110	2.19657	1.64735	1.99557	1.71865		9110	2.21646	1.73903	1.91699	1.76814
	9120	2.23073	1.98944	2.03778	1.35716		9120	2.24102	1.93295	2.00875	1.50764		9120	2.21284	1.67854	1.99587	1.72984		9120	2.21013	1.72785	1.91448	1.76598
	9130	2.23554	2.00043	2.04106	1.3519		9130	2.23476	1.92292	2.0024	1.51034		9130	2.20329	1.68602	1.98139	1.71475		9130	2.21728	1.72528	1.92181	1.7784
	9140	2.22068	2.00033	2.02762	1.32296		9140	2.23319	1.94205	1.99916	1.48529		9140	2.19805	1.69083	1.98064	1.69735		9140	2.20778	1.71836	1.914	1.76987
	9150	2.23731	2.02094	2.05087	1.3118		9150	2.23092	1.95915	1.99508	1.46131		9150	2.20057	1.71063	1.9786	1.68639		9150	2.22065	1.70611	1.92176	1.80517
	9160	2.23716	2.01818	2.04964	1.31747		9160	2.23084	1.95454	2.00263	1.45689		9160	2.20121	1.69404	1.98292	1.69967		9160	2.21819	1.68757	1.92584	1.81216
	9170	2.23833	2.04189	2.04808	1.28697		9170	2.24013	1.96852	2.00809	1.45906		9170	2.20245	1.67875	1.97868	1.72284		9170	2.21714	1.6762	1.93388	1.8116
	9180	2.24756	2.05318	2.05061	1.29713		9180	2.23415	1.96395	2.0071	1.44822		9180	2.19345	1.66197	1.9738	1.72174		9180	2.21999	1.68777	1.92454	1.81776
	9190	2.23521	2.03655	2.04348	1.29188		9190	2.24057	1.98865	2.02007	1.41593		9190	2.19259	1.65634	1.97371	1.72507		9190	2.21943	1.6702	1.92441	1.8327
	9200	2.23151	2.04173	2.03728	1.28066		9200	2.25486	2.00089	2.03396	1.42417		9200	2.19775	1.63858	1.98215	1.74537		9200	2.21485	1.6944	1.90734	1.8172
	9210	2.22802	2.05259	2.03534	1.25397		9210	2.23652	2.00475	2.01092	1.39327		9210	2.19549	1.64877	1.98944	1.72163		9210	2.21846	1.68656	1.90808	1.83245
	9220	2.22373	2.0434	2.03263	1.25812		9220	2.25332	2.02721	2.04147	1.37029		9220	2.20215	1.64998	1.99318	1.73312		9220	2.20584	1.68856	1.88864	1.82023
	9230	2.22509	2.04006	2.0336	1.26676		9230	2.22948	1.9921	2.01235	1.38679		9230	2.19828	1.65155	1.9804	1.73646		9230	2.21356	1.70056	1.88644	1.83007
	9240	2.23003	2.03771	2.03989	1.27774		9240	2.2322	1.98427	2.01668	1.4004		9240	2.21257	1.64766	1.98316	1.77291		9240	2.22103	1.7259	1.87828	1.83285
	9250	2.22252	2.02838	2.02999	1.28221		9250	2.23022	1.98587	2.01345	1.39647		9250	2.19449	1.66304	1.96022	1.7388		9250	2.21914	1.7351	1.87275	1.82522
	9260	2.23998	2.03497	2.04959	1.30119		9260	2.22995	2.01124	2.01472	1.35689		9260	2.20622	1.66569	1.96585	1.75947		9260	2.21725	1.74347	1.87742	1.80776
	9270	2.22784	2.01201	2.04083	1.30897		9270	2.25139	2.04239	2.03571	1.34983		9270	2.20639	1.69433	1.95479	1.74482		9270	2.22079	1.73851	1.88862	1.80957
	9280	2.23695	2.02406	2.05153	1.30473		9280	2.2432	2.04605	2.02266	1.33659		9280	2.2096	1.72231	1.95644	1.72355		9280	2.21011	1.72383	1.87967	1.80676
	9290	2.2293	2.01155	2.04389	1.30985		9290	2.23873	2.03444	2.01336	1.35323		9290	2.1993	1.73052	1.94218	1.70502		9290	2.22096	1.72929	1.89787	1.80914
	9300	2.22596	2.016	2.03817	1.30056		9300	2.24198	2.04205	2.00889	1.35915		9300	2.20347	1.72438	1.94935	1.7138		9300	2.2182	1.73558	1.89629	1.79796
	9310	2.22734	2.02771	2.03617	1.29016		9310	2.23153	2.02218	2.00112	1.36592		9310	2.19575	1.72097	1.9283	1.72122		9310	2.22089	1.73454	1.88952	1.81267
	9320	2.23873	2.03966	2.05183	1.28591		9320	2.24089	2.02497	2.00778	1.38256		9320	2.20132	1.72776	1.9328	1.72358		9320	2.21587	1.71326	1.89169	1.81836
	9330	2.24048	2.05093	2.04676	1.28216		9330	2.23422	2.01976	1.99936	1.38081		9330	2.20432	1.71714	1.93921	1.73464		9330	2.22991	1.71952	1.89498	1.84319
	9340	2.23627	2.04723	2.046	1.27458		9340	2.22882	2.01048	1.99123	1.38863		9340	2.20259	1.71563	1.94384	1.72654		9340	2.21522	1.71103	1.88383	1.827
	9350	2.22717	2.03664	2.03942	1.27019		9350	2.23072	2.01125	1.99039	1.39479		9350	2.20575	1.71602	1.95781	1.71842		9350	2.20854	1.71221	1.88767	1.80565
	9360	2.2381	2.03284	2.04757	1.30123		9360	2.22682	2.01827	1.98572	1.37875		9360	2.20355	1.72564	1.94526	1.71739		9360	2.21158	1.71355	1.89763	1.80134
	9370	2.23343	2.03991	2.048	1.27313		9370	2.22022	2.01219	1.9805	1.37387		9370	2.20323	1.70118	1.95412	1.73084		9370	2.20894	1.71333	1.89491	1.79795
	9380	2.23722	2.04751	2.04426	1.28026		9380	2.22808	2.01562	1.98552	1.38698		9380	2.19567	1.68839	1.9517	1.7269		9380	2.20971	1.70123	1.89683	1.80928
	9390	2.22372	2.04363	2.02852	1.26434		9390	2.22623	2.01505	1.98959	1.37596		9390	2.21218	1.68827	1.96701	1.75161		9390	2.21484	1.70205	1.90438	1.81311
	9400	2.23964	2.0504	2.04286	1.28632		9400	2.2418	2.02585	2.00525	1.3879		9400	2.2027	1.68359	1.9553	1.74532		9400	2.21449	1.69689	1.91614	1.8047
	9410	2.22874	2.03847	2.03047	1.28702		9410	2.23806	2.02221	2.00295	1.38446		9410	2.20575	1.67847	1.96173	1.75071		9410	2.21653	1.68896	1.93774	1.79404
	9420	2.22669	2.0446	2.03293	1.26613		9420	2.24352	2.03298	2.00936	1.37705		9420	2.21629	1.66725	1.97498	1.77302		9420	2.19975	1.6898	1.91429	1.77703
	9430	2.22429	2.0423	2.0254	1.27346		9430	2.23364	2.0372	1.99722	1.35617		9430	2.21456	1.66154	1.95798	1.79281		9430	2.21063	1.69653	1.93258	1.77784
	9440	2.22389	2.05039	2.0269	1.25656		9440	2.23797	2.03727	2.00021	1.3659		9440	2.20195	1.63682	1.95152	1.79151		9440	2.21207	1.71079	1.93779	1.76201
	9450	2.22181	2.05169	2.01987	1.25838		9450	2.24806	2.0411	2.00479	1.38646		9450	2.2031	1.64059	1.9574	1.78448		9450	2.21517	1.69709	1.94388	1.77628
	9460	2.23482	2.065	2.03033	1.26586		9460	2.24589	2.03895	1.99618	1.39498		9460	2.20161	1.64145	1.94592	1.79254		9460	2.22108	1.69568	1.94882	1.78694
	9470	2.233	2.06614	2.02873	1.26015		9470	2.23628	2.03252	1.98382	1.39113		9470	2.19724	1.65944	1.93698	1.77486		9470	2.2213	1.68968	1.95727	1.78394
	9480	2.23128	2.06472	2.02375	1.26435		9480	2.23241	2.02481	1.98412	1.38951		9480	2.20041	1.65249	1.94457	1.78089		9480	2.21645	1.6921	1.93718	1.7915
	9490	2.22348	2.0649	2.01813	1.24543		9490	2.23495	2.02649	1.98756	1.39029		9490	2.19863	1.65972	1.95044	1.76324		9490	2.21738	1.71635	1.94774	1.75898
	9500	2.21496	2.0579	2.01418	1.23297		9500	2.23801	2.02547	1.99387	1.39258		9500	2.19652	1.66894	1.9528	1.74661		9500	2.21152	1.70484	1.95634	1.74582
	9510	2.24041	2.09154	2.03512	1.23394		9510	2.24892	2.03834	2.00111	1.39856		9510	2.18649	1.63769	1.95139	1.75257		9510	2.21704	1.69952	1.96045	1.76032
	9520	2.23844	2.09102	2.03579	1.22656		9520	2.23916	2.0357	1.98343	1.39629		9520	2.19604	1.64797	1.95374	1.76417		9520	2.21981	1.6942	1.97227	1.75925
	9530	2.2292	2.07891	2.02676	1.22843		9530	2.24586	2.04445	1.98781	1.39877		9530	2.20696	1.65345	1.9738	1.76395		9530	2.20482	1.68226	1.95727	1.74972
	9540	2.2395	2.08045	2.03963	1.2419		9540	2.24515	2.02614	1.98354	1.42888		9540	2.20172	1.65419	1.96417	1.76091		9540	2.21717	1.67891	1.95308	1.78841
	9550	2.22585	2.06465	2.02103	1.2496		9550	2.23688	2.01935	1.9776	1.42076		9550	2.2015	1.66221	1.96408	1.75289		9550	2.21169	1.66755	1.95987	1.77801
	9560	2.21837	2.05486	2.0173	1.24513		9560	2.24144	2.01746	1.97632	1.43948		9560	2.1967	1.64357	1.95686	1.76645		9560	2.2207	1.68972	1.95935	1.78011
	9570	2.23831	2.0696	2.04103	1.2534		9570	2.2355	2.00595	1.96653	1.45048		9570	2.19817	1.63536	1.96568	1.76795		9570	2.21167	1.6862	1.96058	1.75951
	9580	2.23199	2.05835	2.03456	1.25989		9580	2.21653	1.98484	1.95139	1.44171		9580	2.20491	1.63642	1.96242	1.78727		9580	2.21973	1.7015	1.96685	1.75806
	9590	2.23599	2.07477	2.03414	1.24777		9590	2.23312	2.00142	1.97586	1.43666		9590	2.20594	1.61651	1.98035	1.78813		9590	2.20785	1.68841	1.95476	1.75426
	9600	2.23019	2.06641	2.02717	1.25221		9600	2.24514	2.02125	1.99064	1.42591		9600	2.21032	1.62295	1.99636	1.77527		9600	2.21142	1.68871	1.96256	1.75423
	9610	2.22441	2.0588	2.01924	1.25697		9610	2.22595	2.00644	1.96886	1.41686		9610	2.20642	1.61921	1.99774	1.76742		9610	2.21126	1.68497	1.97063	1.74838
	9620	2.22833	2.06024	2.02186	1.26426		9620	2.22372	1.99938	1.96358	1.42714		9620	2.206	1.64591	1.98972	1.75069		9620	2.21929	1.70578	1.97588	1.74261
	9630	2.22939	2.06446	2.02463	1.25666		9630	2.22575	2.01835	1.95918	1.41273		9630	2.20676	1.65421	1.98425	1.75097		9630	2.20847	1.71297	1.95642	1.72998
	9640	2.23139	2.073	2.02582	1.24778		9640	2.23198	2.02831	1.97586	1.39479		9640	2.21332	1.65834	1.98524	1.76247		9640	2.22254	1.70133	1.97761	1.75325
	9650	2.22158	2.07022	2.01233	1.23919		9650	2.22459	2.01482	1.96328	1.40843		9650	2.20886	1.65075	1.9854	1.75822		9650	2.20939	1.6819	1.97885	1.73729
	9660	2.22522	2.07893	2.01625	1.23127		9660	2.23272	2.01549	1.96885	1.42531		9660	2.20312	1.66776	1.98369	1.72946		9660	2.21542	1.67921	1.99342	1.73861
	9670	2.23526	2.08554	2.02757	1.23782		9670	2.23605	2.03388	1.96962	1.40846		9670	2.20102	1.66545	1.97799	1.73286		9670	2.2017	1.68989	1.97436	1.71498
	9680	2.24314	2.0955	2.03641	1.23502		9680	2.23357	2.04439	1.96941	1.38548		9680	2.20432	1.67255	1.97888	1.73338		9680	2.21574	1.68996	1.99255	1.72997
	9690	2.23222	2.08535	2.01547	1.24694		9690	2.23243	2.04585	1.96784	1.38187		9690	2.21139	1.68103	1.99312	1.72689		9690	2.20836	1.67316	1.98097	1.74069
	9700	2.23819	2.09522	2.02685	1.23326		9700	2.24667	2.05985	1.98302	1.38555		9700	2.21272	1.70033	1.97969	1.72684		9700	2.21839	1.69038	1.98935	1.73999
	9710	2.23601	2.0953	2.02408	1.22974		9710	2.23417	2.05703	1.97955	1.35391		9710	2.21186	1.6978	1.98023	1.72649		9710	2.21112	1.67768	1.97847	1.74616
	9720	2.23477	2.0944	2.02759	1.22095		9720	2.23119	2.04784	1.97543	1.36399		9720	2.20791	1.70809	1.96629	1.72217		9720	2.2119	1.68415	1.97806	1.74238
	9730	2.24324	2.10313	2.04062	1.2153		9730	2.23232	2.04993	1.97231	1.36904		9730	2.20092	1.69806	1.95284	1.72949		9730	2.20736	1.69699	1.96936	1.72823
	9740	2.24641	2.10428	2.03855	1.22843		9740	2.24436	2.06425	1.9912	1.35952		9740	2.19278	1.70744	1.94211	1.71154		9740	2.21639	1.70539	1.9913	1.71788
	9750	2.23852	2.09725	2.03045	1.22504		9750	2.23806	2.05891	1.98376	1.3577		9750	2.19985	1.71442	1.94385	1.72073		9750	2.22209	1.69996	1.99467	1.73401
	9760	2.22912	2.08198	2.02198	1.23082		9760	2.22891	2.04448	1.98185	1.3522		9760	2.2057	1.72674	1.95681	1.70865		9760	2.21916	1.70534	1.99702	1.71845
	9770	2.23044	2.08653	2.01776	1.23482		9770	2.23325	2.04105	1.98383	1.36871		9770	2.20739	1.7297	1.96684	1.69847		9770	2.22482	1.70462	1.9977	1.73294
	9780	2.24803	2.1064	2.03937	1.22937		9780	2.24286	2.05166	1.99171	1.37282		9780	2.21693	1.72995	1.99033	1.6957		9780	2.22856	1.72362	1.99515	1.72668
	9790	2.22732	2.0824	2.02299	1.2219		9790	2.22494	2.03537	1.97948	1.35634		9790	2.19889	1.71708	1.97007	1.68544		9790	2.2142	1.69651	1.98418	1.72924
	9800	2.23166	2.08862	2.02581	1.22244		9800	2.23006	2.04004	1.98115	1.3637		9800	2.20947	1.73005	1.9783	1.69021		9800	2.22128	1.69793	1.99272	1.73616
	9810	2.2319	2.09094	2.0235	1.22321		9810	2.23556	2.04825	1.98667	1.36132		9810	2.21594	1.72609	1.99594	1.69046		9810	2.20983	1.71116	1.96291	1.72789
	9820	2.225	2.0859	2.01593	1.21914		9820	2.23766	2.04491	1.98254	1.37919		9820	2.21143	1.72546	1.97833	1.69996		9820	2.21803	1.7078	1.97131	1.74259
	9830	2.2193	2.08032	2.01017	1.2174		9830	2.24389	2.04487	1.99097	1.38733		9830	2.20313	1.71073	1.96054	1.71385		9830	2.22021	1.71658	1.97609	1.73411
	9840	2.21877	2.08261	2.00746	1.21603		9840	2.24024	2.04207	1.97814	1.39794		9840	2.21253	1.70855	1.98081	1.71693		9840	2.21514	1.69612	1.97349	1.74418
	9850	2.22162	2.08776	2.01207	1.20997		9850	2.22624	2.03078	1.96728	1.38492		9850	2.21962	1.70795	1.98167	1.73474		9850	2.21994	1.71297	1.96683	1.74744
	9860	2.22303	2.08585	2.01975	1.20563		9860	2.24209	2.04632	1.98152	1.39285		9860	2.21529	1.70772	1.9612	1.74711		9860	2.22628	1.71667	1.97526	1.75043
	9870	2.23336	2.09274	2.02607	1.22119		9870	2.24531	2.05079	1.98279	1.39484		9870	2.2135	1.69008	1.9716	1.74802		9870	2.20419	1.68635	1.95484	1.74693
	9880	2.21873	2.07338	2.0074	1.23165		9880	2.24181	2.04522	1.98042	1.39515		9880	2.21562	1.69565	1.96208	1.75868		9880	2.22349	1.72923	1.96276	1.74503
	9890	2.21939	2.06599	2.01056	1.24127		9890	2.2292	2.03348	1.97349	1.38166		9890	2.21064	1.69789	1.94905	1.75847		9890	2.23353	1.73512	1.97014	1.75649
	9900	2.22863	2.07849	2.00981	1.25464		9900	2.23061	2.04164	1.97802	1.3676		9900	2.22118	1.72158	1.95465	1.75578		9900	2.21857	1.72095	1.95098	1.75387
	9910	2.21935	2.07148	2.00072	1.24787		9910	2.2459	2.06091	1.98952	1.37207		9910	2.20634	1.72321	1.93352	1.74008		9910	2.21022	1.72852	1.95534	1.72017
	9920	2.21922	2.06831	2.0044	1.24675		9920	2.23288	2.04932	1.97822	1.36324		9920	2.20948	1.71518	1.9485	1.73929		9920	2.21871	1.75293	1.96364	1.70784
	9930	2.22238	2.06999	2.00056	1.2613		9930	2.23863	2.05429	1.98323	1.36733		9930	2.21073	1.73412	1.93799	1.73542		9930	2.22184	1.78105	1.95694	1.69452
	9940	2.22109	2.07176	1.99746	1.25876		9940	2.24004	2.05797	1.98143	1.36904		9940	2.2104	1.73578	1.93972	1.73099		9940	2.20262	1.76504	1.9434	1.67656
	9950	2.22143	2.06911	1.99457	1.26884		9950	2.24379	2.06962	1.98593	1.35718		9950	2.21234	1.74351	1.94401	1.72334		9950	2.21175	1.7527	1.96416	1.68932
	9960	2.22793	2.07702	2.0005	1.26938		9960	2.24273	2.07111	1.97921	1.36122		9960	2.20804	1.73873	1.93796	1.72394		9960	2.20809	1.74841	1.9541	1.69584
	9970	2.21135	2.05823	1.98293	1.26958		9970	2.25095	2.07392	1.98163	1.38041		9970	2.20148	1.69383	1.95197	1.73603		9970	2.2137	1.76522	1.95176	1.69575
	9980	2.23332	2.08606	2.00619	1.26452		9980	2.22826	2.05888	1.96435	1.35374		9980	2.2135	1.72075	1.95067	1.74158		9980	2.21593	1.76905	1.94929	1.70041
	9990	2.23571	2.10159	2.00167	1.25436		9990	2.23815	2.07202	1.96978	1.35842		9990	2.20908	1.70162	1.94924	1.75074		9990	2.21366	1.76904	1.94867	1.69522
	10000	2.23065	2.09791	1.98577	1.26769		10000	2.22411	2.05786	1.96505	1.34057		10000	2.21134	1.70095	1.95378	1.75201		10000	2.21206	1.76396	1.9526	1.69183
	10010	2.22751	2.09228	1.98618	1.26531		10010	2.22633	2.04804	1.96586	1.36161		10010	2.21393	1.71003	1.96136	1.74122		10010	2.22749	1.76588	1.96704	1.71342
	10020	2.24144	2.10931	2.00265	1.2603		10020	2.22569	2.03635	1.96276	1.38139		10020	2.21424	1.72877	1.93622	1.7516		10020	2.2198	1.7597	1.9554	1.71315
	10030	2.23341	2.10158	1.99372	1.25886		10030	2.22762	2.0306	1.97405	1.38		10030	2.20714	1.71713	1.93968	1.74127		10030	2.21652	1.73924	1.95217	1.72916
	10040	2.22976	2.09683	1.98508	1.26745		10040	2.24091	2.04066	1.98615	1.39076		10040	2.21795	1.72958	1.95784	1.7361		10040	2.22015	1.73678	1.95501	1.73772
	10050	2.24246	2.11487	2.00365	1.25297		10050	2.23826	2.03986	1.97416	1.40046		10050	2.21857	1.74864	1.94582	1.73209		10050	2.21826	1.74116	1.95703	1.72621
	10060	2.24091	2.11499	1.99732	1.25733		10060	2.24193	2.04102	1.97438	1.41016		10060	2.20593	1.7282	1.9414	1.72526		10060	2.22352	1.73725	1.95777	1.74275
	10070	2.24476	2.11683	2.00839	1.25032		10070	2.22687	2.02463	1.9513	1.41817		10070	2.21182	1.72923	1.94667	1.73335		10070	2.21599	1.7311	1.94981	1.7386
	10080	2.2487	2.11947	2.01732	1.24561		10080	2.24543	2.04407	1.95838	1.43891		10080	2.21384	1.72846	1.95053	1.73493		10080	2.20989	1.72642	1.95464	1.72223
	10090	2.24596	2.11789	2.00959	1.25089		10090	2.23815	2.03809	1.95255	1.43261		10090	2.20809	1.70747	1.94065	1.75207		10090	2.22899	1.75821	1.97538	1.71562
	10100	2.24039	2.11936	1.99787	1.24721		10100	2.23849	2.03248	1.95359	1.4402		10100	2.2146	1.71394	1.93848	1.76453		10100	2.22079	1.74803	1.97291	1.70759
	10110	2.22533	2.10499	1.98744	1.23423		10110	2.23848	2.0386	1.94943	1.43715		10110	2.20999	1.71463	1.93447	1.7567		10110	2.21345	1.73934	1.96789	1.70319
	10120	2.22445	2.10303	1.98558	1.23739		10120	2.22006	2.02636	1.93362	1.41855		10120	2.20854	1.72242	1.93767	1.74185		10120	2.22144	1.73951	1.97128	1.71983
	10130	2.22803	2.10632	1.98923	1.23878		10130	2.23507	2.04441	1.94012	1.43085		10130	2.19986	1.7055	1.93214	1.74267		10130	2.21342	1.72484	1.9606	1.72612
	10140	2.23207	2.11176	1.99124	1.24083		10140	2.23433	2.04424	1.92631	1.44737		10140	2.21132	1.70602	1.94095	1.76127		10140	2.2257	1.72805	1.96868	1.74516
	10150	2.22432	2.09784	1.9856	1.24566		10150	2.22739	2.03022	1.91921	1.45513		10150	2.1912	1.66832	1.9392	1.74898		10150	2.23175	1.73851	1.97163	1.74691
	10160	2.22533	2.10128	1.98041	1.25172		10160	2.23237	2.03964	1.92201	1.45349		10160	2.20371	1.6808	1.95916	1.74621		10160	2.21797	1.75398	1.95652	1.713
	10170	2.23119	2.10564	1.98985	1.25027		10170	2.22938	2.04311	1.92251	1.43872		10170	2.20528	1.69188	1.94925	1.75057		10170	2.21201	1.76157	1.95606	1.69017
	10180	2.24052	2.11307	2.00015	1.25466		10180	2.23196	2.04225	1.93286	1.43407		10180	2.21205	1.68102	1.95503	1.77153		10180	2.21909	1.77449	1.95968	1.69103
	10190	2.23218	2.10188	1.99134	1.25774		10190	2.22794	2.02636	1.93464	1.44168		10190	2.2077	1.67981	1.94763	1.76998		10190	2.21082	1.7689	1.95955	1.67529
	10200	2.2359	2.11382	1.99597	1.24354		10200	2.24053	2.04289	1.95301	1.43256		10200	2.20557	1.66808	1.9453	1.77832		10200	2.21622	1.77719	1.95875	1.68171
	10210	2.24341	2.11497	2.00593	1.25258		10210	2.24631	2.04507	1.96286	1.43413		10210	2.19921	1.67138	1.92357	1.78309		10210	2.21072	1.75843	1.9541	1.69232
	10220	2.23097	2.09861	2.00042	1.24444		10220	2.24256	2.04395	1.95704	1.43192		10220	2.20341	1.67526	1.943	1.76869		10220	2.20267	1.75349	1.93794	1.69504
	10230	2.24038	2.10409	2.01598	1.24388		10230	2.24169	2.04671	1.95941	1.42197		10230	2.21675	1.69146	1.95412	1.77435		10230	2.2019	1.74662	1.95549	1.67991
	10240	2.228	2.09552	1.98969	1.25616		10240	2.23404	2.03548	1.95777	1.41627		10240	2.21564	1.70078	1.95055	1.76657		10240	2.21328	1.7702	1.96446	1.67467
	10250	2.21922	2.08414	1.97638	1.26497		10250	2.23835	2.03053	1.95218	1.44444		10250	2.20997	1.69975	1.93497	1.77051		10250	2.20199	1.73826	1.95751	1.68644
	10260	2.22913	2.09792	1.99074	1.25449		10260	2.23166	2.01796	1.95453	1.43813		10260	2.21433	1.70937	1.92232	1.78584		10260	2.20988	1.73809	1.96281	1.70106
	10270	2.23532	2.10575	1.9961	1.25488		10270	2.23714	2.0183	1.96288	1.4433		10270	2.21675	1.69522	1.93482	1.79184		10270	2.19655	1.72766	1.95225	1.68925
	10280	2.23413	2.10466	1.99777	1.24979		10280	2.24389	2.03353	1.963	1.44273		10280	2.22761	1.71409	1.93303	1.80272		10280	2.20217	1.70836	1.95553	1.71946
	10290	2.2307	2.10263	1.99421	1.24663		10290	2.23602	2.02894	1.95528	1.4352		10290	2.20324	1.69813	1.90475	1.78796		10290	2.20473	1.71901	1.95156	1.71991
	10300	2.22328	2.09552	1.98849	1.24123		10300	2.22377	2.022	1.94817	1.41648		10300	2.21157	1.71251	1.90883	1.79047		10300	2.20078	1.72474	1.94498	1.71149
	10310	2.22375	2.09693	1.98484	1.24636		10310	2.23994	2.0458	1.95444	1.4246		10310	2.21205	1.7051	1.93009	1.77588		10310	2.2171	1.75451	1.95646	1.71027
	10320	2.23074	2.10586	1.99396	1.24175		10320	2.22588	2.02629	1.92703	1.44562		10320	2.21783	1.70312	1.94544	1.77544		10320	2.20267	1.755	1.94264	1.6881
	10330	2.22247	2.09503	1.99135	1.23455		10330	2.2243	2.01434	1.92288	1.46286		10330	2.20397	1.68781	1.94101	1.76031		10330	2.21018	1.77114	1.95208	1.67996
	10340	2.20925	2.0824	1.9805	1.22589		10340	2.23377	2.0269	1.91782	1.48093		10340	2.19721	1.68108	1.93269	1.759		10340	2.21365	1.76892	1.95489	1.68814
	10350	2.22039	2.09706	1.99086	1.22438		10350	2.23563	2.03398	1.91525	1.48013		10350	2.1998	1.6598	1.92998	1.78843		10350	2.21593	1.77231	1.94597	1.70082
	10360	2.22035	2.09515	1.99132	1.22674		10360	2.22868	2.03084	1.90742	1.47358		10360	2.19399	1.65299	1.94052	1.76895		10360	2.20978	1.77898	1.93566	1.68959
	10370	2.21899	2.08955	1.98852	1.23589		10370	2.24158	2.04203	1.92528	1.47405		10370	2.19626	1.64817	1.94962	1.76907		10370	2.21078	1.7856	1.92885	1.693
	10380	2.21609	2.0941	1.98397	1.22503		10380	2.23754	2.03723	1.91624	1.48018		10380	2.20468	1.63951	1.95843	1.78825		10380	2.20226	1.79639	1.91021	1.68049
	10390	2.20887	2.08629	1.97469	1.22728		10390	2.22329	2.02902	1.89634	1.47412		10390	2.20627	1.63967	1.96165	1.78848		10390	2.20769	1.8149	1.9082	1.67712
	10400	2.21175	2.0951	1.98032	1.2135		10400	2.22468	2.02994	1.90366	1.46759		10400	2.20763	1.67154	1.9415	1.78431		10400	2.20519	1.79876	1.90444	1.69213
	10410	2.21771	2.10177	1.99244	1.20384		10410	2.2356	2.04981	1.92571	1.4442		10410	2.20116	1.67938	1.94768	1.75399		10410	2.20358	1.80513	1.90155	1.68439
	10420	2.21855	2.09829	1.98765	1.22081		10420	2.24296	2.0594	1.93802	1.43691		10420	2.19701	1.67869	1.9392	1.75362		10420	2.20236	1.79657	1.91001	1.68077
	10430	2.21977	2.09767	1.99041	1.22181		10430	2.23376	2.04138	1.93852	1.43326		10430	2.20115	1.6698	1.93331	1.77881		10430	2.21002	1.79623	1.91509	1.69539
	10440	2.2245	2.10293	1.99685	1.21948		10440	2.24086	2.05555	1.94191	1.43061		10440	2.20672	1.67493	1.94821	1.77153		10440	2.20473	1.81561	1.89884	1.67916
	10450	2.22087	2.10036	1.98591	1.2285		10450	2.24307	2.0471	1.94803	1.44128		10450	2.2096	1.68971	1.94243	1.77103		10450	2.21062	1.80716	1.91693	1.68323
	10460	2.22227	2.10509	1.99105	1.21708		10460	2.2444	2.0558	1.9474	1.43387		10460	2.21446	1.688	1.95245	1.77377		10460	2.2196	1.80591	1.92401	1.70004
	10470	2.23398	2.12047	2.0085	1.20451		10470	2.24016	2.05042	1.94819	1.42723		10470	2.19529	1.66251	1.94323	1.76027		10470	2.20943	1.78873	1.92472	1.69087
	10480	2.21772	2.09895	1.99585	1.20316		10480	2.23325	2.04963	1.94166	1.41557		10480	2.21016	1.66786	1.96471	1.76856		10480	2.21271	1.79775	1.9197	1.69558
	10490	2.22539	2.1076	2.00402	1.20276		10490	2.23851	2.06431	1.94361	1.40815		10490	2.20961	1.6522	1.96615	1.78023		10490	2.20771	1.7968	1.9264	1.67586
	10500	2.22852	2.11217	2.00304	1.20797		10500	2.24099	2.07585	1.94812	1.39276		10500	2.20959	1.64677	1.96808	1.78308		10500	2.21019	1.81254	1.92437	1.66776
	10510	2.2236	2.11115	1.99747	1.20079		10510	2.23082	2.05925	1.93879	1.39775		10510	2.20444	1.65157	1.95194	1.78363		10510	2.20668	1.80857	1.92767	1.65894
	10520	2.22025	2.10558	1.99366	1.20453		10520	2.24919	2.07831	1.9581	1.40148		10520	2.20075	1.63639	1.95812	1.78174		10520	2.22129	1.84319	1.93475	1.65156
	10530	2.2186	2.10159	1.9938	1.20517		10530	2.23135	2.05675	1.93455	1.40894		10530	2.20869	1.65092	1.96517	1.78023		10530	2.21487	1.84108	1.92571	1.64723
	10540	2.2374	2.12778	2.01988	1.18512		10540	2.23225	2.06558	1.9385	1.39335		10540	2.19681	1.64787	1.95421	1.76565		10540	2.21066	1.81886	1.9235	1.6631
	10550	2.22544	2.10991	2.01499	1.18034		10550	2.23591	2.06653	1.94039	1.40105		10550	2.2124	1.65677	1.96544	1.7837		10550	2.20345	1.78447	1.92522	1.67915
	10560	2.22294	2.10582	2.00866	1.18899		10560	2.2331	2.05718	1.93781	1.40939		10560	2.20473	1.68063	1.95571	1.75282		10560	2.20909	1.80408	1.93586	1.66071
	10570	2.2167	2.09552	2.00343	1.19274		10570	2.24658	2.06746	1.95205	1.4175		10570	2.21443	1.68754	1.95598	1.77025		10570	2.19609	1.79473	1.91378	1.66193
	10580	2.20558	2.07949	1.99212	1.19848		10580	2.23717	2.05127	1.93559	1.43377		10580	2.21271	1.69404	1.93663	1.78097		10580	2.19443	1.79236	1.90123	1.67445
	10590	2.21683	2.08443	2.00853	1.20401		10590	2.24084	2.05052	1.93125	1.45203		10590	2.21006	1.67484	1.94176	1.78696		10590	2.20809	1.80104	1.91573	1.68451
	10600	2.21681	2.08572	2.00554	1.20667		10600	2.24215	2.05583	1.9268	1.45446		10600	2.21008	1.67811	1.9267	1.80019		10600	2.20451	1.80277	1.90621	1.68408
	10610	2.20624	2.07446	2.00117	1.19452		10610	2.23509	2.04997	1.91157	1.4611		10610	2.22639	1.68393	1.94611	1.81402		10610	2.21148	1.81982	1.91675	1.67201
	10620	2.20924	2.07759	2.00513	1.19357		10620	2.24002	2.06465	1.91513	1.45082		10620	2.21062	1.68099	1.92768	1.79778		10620	2.20065	1.80513	1.90798	1.66937
	10630	2.21814	2.084	2.01601	1.19705		10630	2.23674	2.06153	1.92698	1.42929		10630	2.20819	1.67004	1.92938	1.80019		10630	2.19609	1.81347	1.90036	1.65697
	10640	2.21722	2.08685	2.0163	1.18814		10640	2.23286	2.04944	1.93148	1.42844		10640	2.21758	1.68151	1.94345	1.79747		10640	2.20532	1.81789	1.91095	1.66445
	10650	2.22536	2.09517	2.02487	1.18939		10650	2.23253	2.05312	1.93018	1.42389		10650	2.21239	1.67655	1.92724	1.80672		10650	2.20074	1.82122	1.90593	1.6544
	10660	2.22	2.09078	2.02149	1.18279		10660	2.24207	2.05848	1.94124	1.43108		10660	2.20468	1.68078	1.91842	1.79327		10660	2.20454	1.82671	1.90815	1.65591
	10670	2.21646	2.08817	2.01619	1.18317		10670	2.22674	2.04274	1.91839	1.43655		10670	2.20716	1.68081	1.9252	1.79209		10670	2.21199	1.83007	1.90931	1.67067
	10680	2.22488	2.09562	2.02568	1.18541		10680	2.23184	2.05434	1.93041	1.41968		10680	2.20938	1.68168	1.93038	1.79118		10680	2.20394	1.83261	1.91143	1.64398
	10690	2.23722	2.10808	2.03921	1.18657		10690	2.21475	2.04001	1.91265	1.41081		10690	2.20844	1.6692	1.9283	1.80273		10690	2.21532	1.84473	1.92251	1.64809
	10700	2.23763	2.11101	2.04326	1.17589		10700	2.21042	2.04108	1.90736	1.40281		10700	2.22023	1.66963	1.94272	1.81576		10700	2.21034	1.84776	1.92983	1.62258
	10710	2.23562	2.10904	2.03642	1.18359		10710	2.21735	2.05378	1.91933	1.38976		10710	2.20995	1.65471	1.93856	1.80877		10710	2.20964	1.85866	1.92734	1.61114
	10720	2.22886	2.09982	2.02844	1.1882		10720	2.23107	2.06891	1.93224	1.39335		10720	2.21801	1.66222	1.95197	1.8072		10720	2.21278	1.85779	1.93598	1.6104
	10730	2.2197	2.09066	2.01949	1.18531		10730	2.23439	2.06075	1.94024	1.40491		10730	2.2236	1.67171	1.95667	1.80712		10730	2.19598	1.84742	1.92701	1.58691
	10740	2.22422	2.09655	2.02557	1.18145		10740	2.22084	2.05027	1.93233	1.38809		10740	2.22228	1.68726	1.95209	1.79431		10740	2.20705	1.86608	1.94214	1.57732
	10750	2.21713	2.08979	2.01068	1.19217		10750	2.22291	2.04359	1.92957	1.40824		10750	2.21904	1.67955	1.93594	1.81095		10750	2.21368	1.86309	1.94651	1.59398
	10760	2.21985	2.09193	2.01866	1.18503		10760	2.22824	2.04755	1.93231	1.41556		10760	2.21144	1.67728	1.92489	1.80622		10760	2.21317	1.85836	1.94331	1.60196
	10770	2.23537	2.11289	2.03264	1.1823		10770	2.23283	2.06184	1.93746	1.40219		10770	2.22193	1.67568	1.95544	1.80064		10770	2.21979	1.8614	1.9471	1.61213
	10780	2.23281	2.11023	2.02648	1.18794		10780	2.23639	2.04801	1.95107	1.41488		10780	2.21819	1.65014	1.9499	1.8209		10780	2.22698	1.8856	1.94029	1.61203
	10790	2.21715	2.09369	2.0073	1.19109		10790	2.22967	2.04677	1.94125	1.40894		10790	2.21625	1.66534	1.91525	1.83903		10790	2.21521	1.88779	1.93208	1.58671
	10800	2.23413	2.10934	2.03385	1.18186		10800	2.23794	2.05645	1.94954	1.40963		10800	2.21693	1.66049	1.90648	1.85409		10800	2.21081	1.90147	1.91553	1.57812
	10810	2.23664	2.11749	2.03051	1.18252		10810	2.23138	2.06409	1.94144	1.38869		10810	2.20218	1.65057	1.87834	1.85652		10810	2.21479	1.90792	1.91876	1.5776
	10820	2.23577	2.11512	2.02971	1.18484		10820	2.23721	2.08144	1.95966	1.35557		10820	2.21201	1.683	1.87816	1.85096		10820	2.21146	1.91421	1.91611	1.5638
	10830	2.23539	2.1119	2.03476	1.18049		10830	2.2311	2.07864	1.9467	1.35839		10830	2.21799	1.72695	1.87824	1.82451		10830	2.20746	1.89074	1.91941	1.57694
	10840	2.229	2.10733	2.02249	1.18555		10840	2.23287	2.0861	1.94448	1.35596		10840	2.20003	1.68934	1.85977	1.83511		10840	2.22234	1.92604	1.93413	1.55792
	10850	2.23787	2.11438	2.03615	1.18303		10850	2.23204	2.08605	1.93397	1.36826		10850	2.20777	1.68291	1.88537	1.83349		10850	2.21523	1.92307	1.92122	1.55731
	10860	2.23795	2.11656	2.03433	1.18258		10860	2.22483	2.06983	1.92184	1.38639		10860	2.21577	1.69063	1.89751	1.83315		10860	2.23167	1.93515	1.91611	1.59512
	10870	2.23802	2.11876	2.03101	1.18464		10870	2.22823	2.07857	1.92601	1.37843		10870	2.20951	1.66569	1.90306	1.83514		10870	2.22424	1.92026	1.91506	1.59361
	10880	2.23752	2.12013	2.03071	1.18081		10880	2.21381	2.05643	1.91822	1.37604		10880	2.21014	1.66698	1.89257	1.8463		10880	2.2267	1.91254	1.91487	1.60991
	10890	2.24531	2.12794	2.04093	1.17867		10890	2.21778	2.06127	1.93197	1.36228		10890	2.21538	1.67679	1.89543	1.84704		10890	2.21638	1.89365	1.9224	1.59474
	10900	2.24233	2.124	2.0339	1.18659		10900	2.21972	2.07107	1.93056	1.35572		10900	2.22435	1.68478	1.90313	1.8534		10900	2.22206	1.90413	1.93017	1.58867
	10910	2.24123	2.12353	2.03181	1.18686		10910	2.22054	2.07412	1.93346	1.34956		10910	2.22861	1.68633	1.90376	1.86154		10910	2.231	1.91298	1.9316	1.60129
	10920	2.25261	2.13372	2.04658	1.18627		10920	2.2225	2.08161	1.93362	1.34427		10920	2.22857	1.66956	1.90536	1.87489		10920	2.22179	1.91218	1.91132	1.60099
	10930	2.24132	2.11964	2.03108	1.19535		10930	2.21559	2.07705	1.9306	1.33278		10930	2.22632	1.66599	1.89853	1.87965		10930	2.21425	1.90688	1.89653	1.60399
	10940	2.25194	2.13217	2.04385	1.19123		10940	2.2301	2.093	1.94926	1.32908		10940	2.22492	1.64899	1.90398	1.8858		10940	2.2084	1.9097	1.8828	1.60067
	10950	2.24374	2.12214	2.03001	1.2018		10950	2.20956	2.07137	1.91735	1.34074		10950	2.21768	1.65094	1.89902	1.87199		10950	2.22814	1.92631	1.89431	1.62176
	10960	2.24462	2.12261	2.02914	1.20574		10960	2.22604	2.08608	1.92549	1.36063		10960	2.20892	1.61178	1.91182	1.87236		10960	2.20791	1.90937	1.89021	1.59094
	10970	2.23676	2.10987	2.02236	1.21026		10970	2.22652	2.08601	1.91454	1.37764		10970	2.20504	1.60627	1.91203	1.86773		10970	2.20509	1.90923	1.88783	1.58613
	10980	2.24675	2.12628	2.02962	1.20639		10980	2.22859	2.08179	1.91749	1.3866		10980	2.22499	1.60789	1.94725	1.87725		10980	2.21312	1.9364	1.89755	1.56379
	10990	2.23559	2.11114	2.02405	1.20084		10990	2.23056	2.07662	1.91556	1.40324		10990	2.21847	1.62409	1.94818	1.84666		10990	2.20977	1.92752	1.89181	1.57223
	11000	2.23271	2.10684	2.01902	1.20614		11000	2.22253	2.05973	1.91485	1.4036		11000	2.21426	1.62887	1.94448	1.8362		11000	2.21155	1.93866	1.88162	1.57577
	11010	2.22599	2.1012	2.01543	1.1971		11010	2.22487	2.07842	1.91446	1.38387		11010	2.21347	1.63954	1.93455	1.8353		11010	2.21235	1.94139	1.88307	1.57291
	11020	2.23592	2.11325	2.02459	1.19746		11020	2.23533	2.08663	1.93086	1.38245		11020	2.20094	1.62206	1.91491	1.84128		11020	2.20418	1.93246	1.87927	1.56549
	11030	2.24257	2.12175	2.03311	1.19284		11030	2.21926	2.07792	1.90893	1.37421		11030	2.2174	1.65127	1.91053	1.85928		11030	2.21664	1.94157	1.89251	1.57343
	11040	2.24119	2.11639	2.03314	1.19712		11040	2.23113	2.08249	1.90934	1.40483		11040	2.20817	1.64938	1.89	1.85997		11040	2.20936	1.93378	1.89669	1.55742
	11050	2.22007	2.09429	2.0052	1.20438		11050	2.21036	2.0701	1.88232	1.3939		11050	2.20796	1.64197	1.90417	1.85154		11050	2.21528	1.93575	1.91222	1.55279
	11060	2.25162	2.13033	2.03993	1.19997		11060	2.20886	2.07925	1.86227	1.40241		11060	2.21613	1.66733	1.89327	1.85958		11060	2.21308	1.92338	1.91598	1.55728
	11070	2.2474	2.11806	2.04166	1.20292		11070	2.20992	2.07449	1.86971	1.4029		11070	2.21375	1.67703	1.87337	1.86532		11070	2.21746	1.93404	1.91533	1.55731
	11080	2.24347	2.11679	2.03477	1.20218		11080	2.21031	2.07029	1.88377	1.39149		11080	2.20612	1.6586	1.87997	1.85706		11080	2.21173	1.92155	1.9124	1.56008
	11090	2.25679	2.12996	2.04839	1.20562		11090	2.22872	2.09381	1.89903	1.39427		11090	2.21286	1.67001	1.87953	1.86332		11090	2.20752	1.92743	1.88599	1.57299
	11100	2.24725	2.11712	2.03514	1.21502		11100	2.21127	2.07952	1.8945	1.36598		11100	2.21306	1.68272	1.87686	1.85504		11100	2.21178	1.93872	1.88707	1.5698
	11110	2.23075	2.10535	2.02165	1.19705		11110	2.21088	2.08065	1.88503	1.37603		11110	2.20476	1.67082	1.87675	1.8461		11110	2.21734	1.9495	1.88847	1.57048
	11120	2.22149	2.09289	2.01486	1.19593		11120	2.21471	2.08737	1.90199	1.35468		11120	2.21989	1.69186	1.88864	1.85109		11120	2.22366	1.95271	1.8991	1.57152
	11130	2.22804	2.1031	2.01737	1.19813		11130	2.20532	2.07235	1.89689	1.35428		11130	2.20152	1.66595	1.88391	1.83544		11130	2.21286	1.93032	1.90251	1.56456
	11140	2.23019	2.10281	2.02119	1.20018		11140	2.20295	2.06841	1.88839	1.36443		11140	2.21287	1.69828	1.88601	1.83096		11140	2.22361	1.94924	1.90632	1.56694
	11150	2.24386	2.11552	2.04136	1.1947		11150	2.21113	2.07703	1.88547	1.38172		11150	2.2113	1.72012	1.88085	1.81197		11150	2.21319	1.94078	1.89298	1.56409
	11160	2.22631	2.09827	2.02673	1.18427		11160	2.21026	2.07529	1.88587	1.381		11160	2.20478	1.71238	1.87108	1.81353		11160	2.20384	1.94081	1.88934	1.54192
	11170	2.24144	2.11145	2.04368	1.18884		11170	2.21302	2.08642	1.89222	1.36428		11170	2.2076	1.71654	1.88462	1.80242		11170	2.20844	1.94903	1.89303	1.54019
	11180	2.23347	2.1059	2.03052	1.19119		11180	2.20968	2.0753	1.88617	1.37871		11180	2.20742	1.72385	1.87416	1.80591		11180	2.22018	1.96217	1.89875	1.55016
	11190	2.2286	2.09959	2.02468	1.19402		11190	2.20122	2.0604	1.88637	1.3737		11190	2.2081	1.71081	1.87501	1.81902		11190	2.21134	1.94995	1.88318	1.55928
	11200	2.24267	2.11506	2.03793	1.19689		11200	2.20298	2.05652	1.896	1.37193		11200	2.20737	1.72138	1.86699	1.81554		11200	2.21918	1.96499	1.87606	1.57123
	11210	2.22417	2.09587	2.02148	1.18947		11210	2.21096	2.07124	1.90716	1.35992		11210	2.20262	1.70686	1.87083	1.81376		11210	2.21436	1.95406	1.87893	1.56782
	11220	2.23567	2.11	2.03389	1.18645		11220	2.20531	2.06913	1.91097	1.33929		11220	2.21503	1.71087	1.88436	1.82615		11220	2.21028	1.9565	1.88341	1.54776
	11230	2.23115	2.10506	2.02772	1.18877		11230	2.19834	2.06375	1.9033	1.33559		11230	2.1941	1.70204	1.86351	1.80514		11230	2.20686	1.96127	1.86748	1.55125
	11240	2.23253	2.10818	2.03046	1.18371		11240	2.21939	2.09186	1.9255	1.32966		11240	2.20265	1.72513	1.86013	1.80754		11240	2.20801	1.96972	1.85146	1.56298
	11250	2.23068	2.11016	2.02544	1.18182		11250	2.21991	2.09181	1.92343	1.33444		11250	2.21604	1.73756	1.86489	1.8234		11250	2.20577	1.96658	1.85854	1.55218
	11260	2.22793	2.10562	2.01924	1.19012		11260	2.23364	2.10845	1.94453	1.32345		11260	2.20236	1.72627	1.87048	1.79501		11260	2.21096	1.98482	1.87666	1.52163
	11270	2.24038	2.11931	2.036	1.18402		11270	2.22256	2.09085	1.92685	1.33983		11270	2.20295	1.72626	1.8792	1.78735		11270	2.20843	1.99388	1.86961	1.51107
	11280	2.23362	2.11154	2.02942	1.18364		11280	2.21612	2.07962	1.91788	1.34881		11280	2.21388	1.74668	1.88401	1.78946		11280	2.20037	1.97803	1.8567	1.52426
	11290	2.25097	2.12918	2.0454	1.19025		11290	2.21215	2.07586	1.92011	1.33834		11290	2.22485	1.75854	1.88788	1.80093		11290	2.19902	1.97453	1.85358	1.52866
	11300	2.24922	2.12845	2.04326	1.1886		11300	2.19862	2.0638	1.90984	1.32708		11300	2.19931	1.75233	1.85139	1.78203		11300	2.21811	1.99974	1.88492	1.51264
	11310	2.23568	2.10961	2.03453	1.18606		11310	2.20311	2.06837	1.91502	1.32736		11310	2.19884	1.75832	1.86048	1.76542		11310	2.20058	1.98462	1.88856	1.47638
	11320	2.22571	2.10221	2.02537	1.17734		11320	2.20892	2.07499	1.92198	1.32629		11320	2.21573	1.7673	1.86962	1.78887		11320	2.20383	1.97792	1.89154	1.49119
	11330	2.23241	2.1058	2.0363	1.17746		11330	2.20742	2.07507	1.9179	1.32709		11330	2.20763	1.75104	1.86791	1.78663		11330	2.20513	1.97094	1.8839	1.51379
	11340	2.23813	2.11223	2.0413	1.179		11340	2.20169	2.0683	1.90825	1.3325		11340	2.20859	1.758	1.87335	1.77644		11340	2.19107	1.95408	1.87441	1.50657
	11350	2.22715	2.10344	2.02447	1.18212		11350	2.19473	2.06274	1.89267	1.34036		11350	2.20294	1.76219	1.85936	1.77295		11350	2.20182	1.96492	1.8741	1.5241
	11360	2.23525	2.11033	2.03065	1.18982		11360	2.20588	2.07492	1.91081	1.3324		11360	2.213	1.75908	1.89515	1.76317		11360	2.19848	1.97397	1.86	1.52002
	11370	2.22523	2.10004	2.02051	1.18774		11370	2.21026	2.07903	1.91514	1.3343		11370	2.19455	1.74217	1.89143	1.73765		11370	2.22015	1.98676	1.87505	1.54762
	11380	2.23403	2.10886	2.03356	1.18285		11380	2.20253	2.06114	1.9125	1.34029		11380	2.20655	1.77431	1.89625	1.73025		11380	2.2177	1.97868	1.87314	1.55324
	11390	2.23895	2.11563	2.03633	1.18461		11390	2.2031	2.06962	1.90855	1.33469		11390	2.20444	1.78648	1.89618	1.71234		11390	2.20986	1.97605	1.86151	1.54822
	11400	2.2299	2.11033	2.02594	1.17769		11400	2.20226	2.0679	1.90401	1.34104		11400	2.20086	1.7789	1.89578	1.71146		11400	2.22107	1.99859	1.86999	1.54112
	11410	2.23061	2.10865	2.02785	1.18011		11410	2.19292	2.05541	1.89179	1.34693		11410	2.2058	1.79373	1.89646	1.70795		11410	2.21072	1.97568	1.86565	1.54615
	11420	2.23271	2.10999	2.03146	1.17944		11420	2.19272	2.05191	1.90131	1.33819		11420	2.19877	1.77952	1.89582	1.70538		11420	2.20455	1.97483	1.86712	1.52775
	11430	2.23408	2.11193	2.03294	1.17861		11430	2.211	2.06417	1.92333	1.348		11430	2.20198	1.77531	1.91098	1.70115		11430	2.20634	1.98211	1.88472	1.50167
	11440	2.25503	2.13339	2.05461	1.18217		11440	2.20048	2.05591	1.90901	1.34652		11440	2.20626	1.79606	1.91339	1.68768		11440	2.21384	2.00676	1.87325	1.50532
	11450	2.24573	2.11953	2.0516	1.17693		11450	2.20286	2.06087	1.91344	1.34044		11450	2.20423	1.81401	1.89916	1.67923		11450	2.20454	1.99958	1.85299	1.51265
	11460	2.24219	2.11898	2.04237	1.18045		11460	2.21508	2.06939	1.9329	1.33967		11460	2.203	1.80988	1.91379	1.66378		11460	2.19898	1.99886	1.82901	1.52652
	11470	2.2488	2.12886	2.05009	1.17442		11470	2.21341	2.06207	1.92905	1.35093		11470	2.20424	1.80866	1.90376	1.67983		11470	2.20007	2.00067	1.84643	1.50621
	11480	2.24994	2.13286	2.04978	1.17206		11480	2.21172	2.06076	1.93197	1.3432		11480	2.19586	1.81901	1.86632	1.6887		11480	2.20864	2.01481	1.83384	1.52765
	11490	2.24527	2.12837	2.04454	1.1715		11490	2.22156	2.07606	1.93964	1.34105		11490	2.21356	1.83642	1.87332	1.70819		11490	2.19475	2.00425	1.81196	1.52764
	11500	2.24331	2.1263	2.04273	1.1709		11500	2.20972	2.06285	1.91981	1.3508		11500	2.20069	1.84183	1.84558	1.69928		11500	2.20542	2.02204	1.79775	1.5515
	11510	2.24174	2.11935	2.03971	1.18267		11510	2.21655	2.06627	1.92971	1.35385		11510	2.20353	1.84993	1.86391	1.6777		11510	2.20159	2.00981	1.79141	1.56383
	11520	2.23665	2.11104	2.03438	1.18745		11520	2.22667	2.07604	1.93182	1.36905		11520	2.19675	1.84149	1.87446	1.65732		11520	2.2042	2.00683	1.79403	1.57197
	11530	2.24559	2.1209	2.04961	1.17738		11530	2.22873	2.07256	1.92129	1.39559		11530	2.18382	1.83335	1.86726	1.64022		11530	2.20828	2.01627	1.80163	1.56261
	11540	2.23613	2.10568	2.03916	1.18681		11540	2.22481	2.06521	1.91608	1.40112		11540	2.20879	1.87048	1.88659	1.64304		11540	2.20577	2.01634	1.78965	1.56919
	11550	2.23857	2.10757	2.03898	1.19295		11550	2.21137	2.06271	1.90337	1.37939		11550	2.20749	1.86961	1.88888	1.63789		11550	2.2023	2.01963	1.78239	1.56349
	11560	2.23736	2.10627	2.04006	1.18882		11560	2.21352	2.06655	1.90646	1.37628		11560	2.20767	1.86865	1.88542	1.64345		11560	2.19895	2.01531	1.77138	1.57209
	11570	2.23255	2.10357	2.03255	1.18841		11570	2.22634	2.07615	1.90492	1.40502		11570	2.21531	1.87436	1.89326	1.64849		11570	2.19342	2.00513	1.77026	1.57092
	11580	2.24143	2.11451	2.04609	1.17915		11580	2.21493	2.06728	1.90251	1.38516		11580	2.20974	1.88518	1.88371	1.63208		11580	2.20385	2.01441	1.79643	1.5585
	11590	2.23047	2.10449	2.02943	1.18429		11590	2.21767	2.06972	1.91131	1.37813		11590	2.19789	1.87284	1.87831	1.62046		11590	2.20594	2.00973	1.79901	1.56745
	11600	2.23891	2.11378	2.04143	1.17894		11600	2.22064	2.08065	1.9258	1.35081		11600	2.19444	1.86359	1.87152	1.62959		11600	2.19928	2.00935	1.78312	1.56739
	11610	2.23957	2.11316	2.03952	1.18586		11610	2.21356	2.07648	1.91594	1.348		11610	2.20605	1.89269	1.87944	1.61825		11610	2.20558	2.00552	1.79284	1.57886
	11620	2.23411	2.10856	2.02844	1.19243		11620	2.21019	2.07392	1.90214	1.36035		11620	2.20432	1.89652	1.85704	1.63482		11620	2.21445	2.02232	1.8031	1.57055
	11630	2.23523	2.1103	2.02922	1.19223		11630	2.21302	2.07854	1.91672	1.34193		11630	2.19856	1.89321	1.8514	1.62953		11630	2.19806	2.0115	1.78826	1.55528
	11640	2.23388	2.1095	2.02542	1.19505		11640	2.2152	2.07909	1.91505	1.35063		11640	2.19809	1.88697	1.84979	1.63734		11640	2.20202	2.01916	1.7904	1.5541
	11650	2.23841	2.11696	2.03192	1.18776		11650	2.20868	2.07516	1.90803	1.34524		11650	2.20956	1.90184	1.85723	1.64255		11650	2.20099	2.01809	1.78702	1.55645
	11660	2.2369	2.10848	2.02972	1.20082		11660	2.21201	2.08025	1.91118	1.34387		11660	2.2194	1.93052	1.84856	1.64542		11660	2.20206	2.02365	1.77797	1.56261
	11670	2.22264	2.09565	2.01541	1.19441		11670	2.21933	2.08407	1.91771	1.35272		11670	2.21311	1.92162	1.83731	1.65146		11670	2.20875	2.0411	1.77471	1.56251
	11680	2.23042	2.10644	2.0218	1.19364		11680	2.22152	2.08383	1.92127	1.35524		11680	2.21248	1.89756	1.8584	1.65399		11680	2.19517	2.0238	1.7755	1.54576
	11690	2.23797	2.11965	2.0298	1.18493		11690	2.22145	2.07678	1.91744	1.37116		11690	2.2368	1.90559	1.90829	1.65339		11690	2.20234	2.02619	1.79911	1.53569
	11700	2.23427	2.11471	2.02779	1.18323		11700	2.22394	2.07848	1.92528	1.36565		11700	2.23993	1.89836	1.91033	1.66778		11700	2.19079	2.01489	1.78644	1.5323
	11710	2.24653	2.12806	2.04055	1.18378		11710	2.2266	2.0824	1.92985	1.36192		11710	2.22245	1.8877	1.89495	1.65054		11710	2.20131	2.02737	1.79358	1.53765
	11720	2.23272	2.11105	2.02482	1.18896		11720	2.21424	2.05979	1.93307	1.3514		11720	2.21849	1.88904	1.89146	1.64234		11720	2.18353	2.00931	1.78955	1.51517
	11730	2.23233	2.10675	2.02883	1.18829		11730	2.21957	2.06598	1.92977	1.36407		11730	2.22084	1.89948	1.89569	1.63174		11730	2.19333	2.02238	1.79818	1.5159
	11740	2.23889	2.11279	2.03455	1.19246		11740	2.21587	2.05437	1.92321	1.37877		11740	2.23136	1.92299	1.89831	1.62988		11740	2.19583	2.02008	1.81216	1.50953
	11750	2.23845	2.11605	2.03177	1.18977		11750	2.21003	2.0448	1.91887	1.38029		11750	2.22531	1.92386	1.8749	1.63936		11750	2.2013	2.01912	1.81611	1.52197
	11760	2.23251	2.11073	2.02852	1.18243		11760	2.21667	2.05319	1.91892	1.38902		11760	2.21125	1.90525	1.86787	1.63106		11760	2.19884	2.01475	1.81444	1.52264
	11770	2.23578	2.11264	2.02771	1.1927		11770	2.21008	2.04495	1.91741	1.38225		11770	2.22779	1.91702	1.88455	1.64305		11770	2.19308	2.01657	1.82525	1.49034
	11780	2.24464	2.12113	2.03847	1.19257		11780	2.21325	2.0515	1.91757	1.38246		11780	2.22504	1.91865	1.87998	1.63891		11780	2.19984	2.03035	1.8145	1.50461
	11790	2.23508	2.11108	2.02877	1.19103		11790	2.20823	2.04265	1.92352	1.3712		11790	2.21892	1.91123	1.8847	1.6255		11790	2.19569	2.02157	1.80648	1.51393
	11800	2.2176	2.08995	2.01051	1.19394		11800	2.2086	2.03656	1.92789	1.37533		11800	2.22408	1.89938	1.89987	1.6358		11800	2.20424	2.04049	1.81393	1.50446
	11810	2.23883	2.1153	2.03465	1.18763		11810	2.20643	2.04189	1.93336	1.35258		11810	2.21848	1.89226	1.89021	1.64006		11810	2.20404	2.0427	1.80155	1.51572
	11820	2.24167	2.11916	2.03794	1.18578		11820	2.21387	2.04163	1.95031	1.35295		11820	2.21642	1.89643	1.88315	1.63777		11820	2.21185	2.05425	1.80114	1.5233
	11830	2.23886	2.1153	2.0315	1.1931		11830	2.2202	2.04771	1.96219	1.34734		11830	2.22307	1.91504	1.89043	1.62573		11830	2.20486	2.04276	1.79443	1.52644
	11840	2.23532	2.10562	2.03478	1.19137		11840	2.22337	2.0637	1.97009	1.3216		11840	2.21383	1.9122	1.88601	1.60891		11840	2.20708	2.03887	1.81283	1.51626
	11850	2.23796	2.10636	2.03481	1.19991		11850	2.2131	2.04418	1.96341	1.32741		11850	2.20872	1.91028	1.88406	1.59939		11850	2.19753	2.02948	1.79961	1.51686
	11860	2.23006	2.10249	2.02496	1.1939		11860	2.2219	2.05722	1.97891	1.31356		11860	2.21846	1.91509	1.89268	1.61039		11860	2.1968	2.03868	1.79393	1.50913
	11870	2.22986	2.10178	2.02523	1.19395		11870	2.22114	2.0494	1.98879	1.30828		11870	2.22483	1.91626	1.90375	1.61353		11870	2.18756	2.02521	1.78339	1.51289
	11880	2.2307	2.10155	2.02921	1.19072		11880	2.21463	2.0558	1.97917	1.29064		11880	2.20826	1.90118	1.8759	1.61844		11880	2.19905	2.0333	1.77562	1.54419
	11890	2.24067	2.11326	2.03974	1.18946		11890	2.22199	2.06783	1.99557	1.27131		11890	2.22312	1.92387	1.89114	1.61456		11890	2.20228	2.03543	1.76911	1.55798
	11900	2.23089	2.09646	2.03083	1.19765		11900	2.23071	2.08098	2.00913	1.25897		11900	2.20995	1.90836	1.87179	1.61936		11900	2.20656	2.02883	1.76585	1.58223
	11910	2.22958	2.09777	2.03205	1.18836		11910	2.21613	2.06757	1.99228	1.25637		11910	2.23126	1.9314	1.88498	1.6351		11910	2.2042	2.03227	1.75729	1.58076
	11920	2.23909	2.1073	2.04562	1.18397		11920	2.22359	2.06775	1.99846	1.2725		11920	2.22063	1.92663	1.88076	1.61655		11920	2.20833	2.03792	1.76517	1.57622
	11930	2.23145	2.09922	2.03362	1.1901		11930	2.21799	2.05699	1.99415	1.27714		11930	2.21158	1.89066	1.89465	1.61798		11930	2.21887	2.03745	1.77505	1.59524
	11940	2.2433	2.11475	2.04972	1.1795		11940	2.21929	2.05737	1.99632	1.27767		11940	2.22059	1.90409	1.89219	1.62975		11940	2.20645	2.02109	1.75979	1.59849
	11950	2.25063	2.12615	2.05529	1.17723		11950	2.2148	2.05557	1.99017	1.27455		11950	2.22506	1.9139	1.87063	1.65515		11950	2.2076	2.014	1.76064	1.60965
	11960	2.24827	2.12345	2.05189	1.17906		11960	2.22188	2.06097	2.003	1.27037		11960	2.21302	1.89793	1.86705	1.64526		11960	2.19552	1.99939	1.75214	1.60406
	11970	2.24668	2.12459	2.0488	1.17631		11970	2.21397	2.05979	1.99138	1.26293		11970	2.21649	1.8979	1.86515	1.65675		11970	2.20112	2.00355	1.74099	1.62623
	11980	2.24151	2.11856	2.04367	1.17638		11980	2.21927	2.05878	2.00024	1.26915		11980	2.21798	1.88739	1.86426	1.67366		11980	2.19419	2.01407	1.72905	1.60712
	11990	2.23797	2.11648	2.03748	1.17737		11990	2.21005	2.05382	1.98573	1.2678		11990	2.21774	1.87106	1.8753	1.67901		11990	2.20155	2.01544	1.75806	1.59401
	12000	2.23729	2.11407	2.04002	1.1747		12000	2.21001	2.04527	1.98856	1.27704		12000	2.21148	1.84814	1.88722	1.67454		12000	2.19966	2.02604	1.74599	1.58862
	12010	2.2343	2.10781	2.03608	1.1814		12010	2.215	2.06025	1.99124	1.26599		12010	2.21095	1.85695	1.88264	1.66851		12010	2.20179	2.033	1.74227	1.58973
	12020	2.22066	2.09544	2.02125	1.17742		12020	2.21013	2.05241	1.9879	1.26699		12020	2.21551	1.85139	1.89994	1.6672		12020	2.21006	2.0381	1.76142	1.58503
	12030	2.23236	2.10992	2.03144	1.17828		12030	2.20233	2.0366	1.97463	1.28593		12030	2.22033	1.8507	1.90221	1.67816		12030	2.19926	2.0213	1.73839	1.60183
	12040	2.24086	2.11875	2.04027	1.17947		12040	2.21193	2.04125	1.99111	1.28609		12040	2.2298	1.86684	1.90719	1.67975		12040	2.20802	2.02928	1.73954	1.61453
	12050	2.2441	2.12355	2.04339	1.17772		12050	2.20141	2.03192	1.97399	1.29114		12050	2.21807	1.85518	1.91007	1.65818		12050	2.20301	2.02721	1.74707	1.5952
	12060	2.22342	2.09936	2.01985	1.18325		12060	2.20319	2.03105	1.97901	1.2909		12060	2.22598	1.86	1.92509	1.65661		12060	2.21021	2.04021	1.73116	1.61575
	12070	2.23669	2.11511	2.03384	1.18128		12070	2.21312	2.04084	1.98624	1.29833		12070	2.22487	1.8594	1.9192	1.66114		12070	2.20454	2.03856	1.71779	1.61664
	12080	2.23798	2.12051	2.02932	1.18421		12080	2.21037	2.05136	1.98275	1.27754		12080	2.22478	1.83944	1.92328	1.67831		12080	2.20196	2.04194	1.71337	1.61
	12090	2.23805	2.11765	2.03547	1.17904		12090	2.20839	2.03503	1.97999	1.30088		12090	2.23298	1.81748	1.95195	1.69088		12090	2.22028	2.06136	1.72646	1.62154
	12100	2.23168	2.10976	2.02676	1.18405		12100	2.2092	2.0397	1.98031	1.29581		12100	2.22242	1.82368	1.94282	1.66673		12100	2.21129	2.06359	1.72275	1.59792
	12110	2.23822	2.11616	2.03801	1.178		12110	2.21751	2.03364	1.98887	1.3204		12110	2.23587	1.83331	1.95829	1.674		12110	2.21485	2.06761	1.72692	1.59808
	12120	2.23067	2.11137	2.02629	1.17816		12120	2.20072	1.99316	1.97457	1.34713		12120	2.21963	1.81213	1.94044	1.67462		12120	2.2051	2.05803	1.72135	1.58946
	12130	2.22993	2.11087	2.02612	1.17653		12130	2.20554	1.98018	1.97673	1.37849		12130	2.22316	1.81486	1.93696	1.68505		12130	2.20094	2.06079	1.71072	1.58583
	12140	2.22741	2.10622	2.02385	1.17923		12140	2.20072	1.9687	1.97478	1.3823		12140	2.23057	1.82671	1.93431	1.69483		12140	2.19902	2.05244	1.73154	1.56864
	12150	2.22882	2.10844	2.02626	1.17644		12150	2.21017	1.97339	1.9821	1.39524		12150	2.22395	1.8348	1.92142	1.68331		12150	2.19839	2.05182	1.71494	1.58583
	12160	2.22764	2.10645	2.02089	1.18474		12160	2.21165	1.9785	1.98212	1.39267		12160	2.21292	1.82118	1.92042	1.67014		12160	2.19804	2.04861	1.70148	1.60341
	12170	2.22715	2.10588	2.02342	1.1796		12170	2.2067	1.97431	1.97446	1.39379		12170	2.20411	1.82174	1.89847	1.6713		12170	2.19187	2.04493	1.69416	1.59897
	12180	2.21412	2.09225	2.0074	1.18216		12180	2.19573	1.94956	1.96553	1.40654		12180	2.20408	1.81545	1.90251	1.67348		12180	2.2005	2.04948	1.69787	1.61286
	12190	2.22042	2.09982	2.01419	1.18082		12190	2.193	1.93477	1.9643	1.42012		12190	2.21747	1.81822	1.92052	1.68524		12190	2.19525	2.04363	1.69245	1.61166
	12200	2.21514	2.09267	2.00917	1.18222		12200	2.21241	1.95555	1.98675	1.42064		12200	2.22254	1.81227	1.92561	1.69913		12200	2.20567	2.05963	1.67299	1.63981
	12210	2.22184	2.10056	2.01701	1.18001		12210	2.19773	1.94662	1.96924	1.41165		12210	2.2216	1.81954	1.92152	1.69352		12210	2.19267	2.04265	1.66055	1.63883
	12220	2.2278	2.11079	2.02021	1.17878		12220	2.20225	1.9644	1.97533	1.39247		12220	2.21875	1.79362	1.92685	1.70758		12220	2.19739	2.04861	1.66495	1.63958
	12230	2.22273	2.10593	2.01282	1.18095		12230	2.20759	1.98695	1.98017	1.37037		12230	2.2171	1.77029	1.92428	1.73039		12230	2.18679	2.03707	1.66016	1.63044
	12240	2.21896	2.10174	2.01162	1.17628		12240	2.2052	1.98979	1.97961	1.35932		12240	2.22261	1.78418	1.91469	1.74089		12240	2.20325	2.05504	1.66138	1.65084
	12250	2.23039	2.11226	2.02592	1.17611		12250	2.19257	1.97906	1.9704	1.34745		12250	2.20947	1.77215	1.91519	1.71904		12250	2.20173	2.05385	1.6726	1.63687
	12260	2.22081	2.10397	2.01077	1.18074		12260	2.20575	1.99944	1.98872	1.33338		12260	2.21244	1.76331	1.92584	1.72386		12260	2.20148	2.05851	1.67505	1.62782
	12270	2.23996	2.12352	2.03182	1.18204		12270	2.20805	2.00024	1.99551	1.32966		12270	2.21032	1.74905	1.93187	1.72619		12270	2.20646	2.06866	1.68013	1.62318
	12280	2.22351	2.10785	2.01416	1.17818		12280	2.21862	2.01647	2.01275	1.31424		12280	2.21547	1.74088	1.92729	1.75257		12280	2.1946	2.04525	1.68437	1.6163
	12290	2.24097	2.12474	2.0397	1.17005		12290	2.19798	1.99139	1.98946	1.31859		12290	2.20509	1.74082	1.91153	1.74367		12290	2.19357	2.03769	1.70648	1.59977
	12300	2.22731	2.10847	2.02219	1.17766		12300	2.21291	2.01195	2.00175	1.31872		12300	2.21445	1.7476	1.90789	1.76448		12300	2.19971	2.043	1.72007	1.59531
	12310	2.21866	2.09632	2.01668	1.17616		12310	2.21238	2.01587	1.99517	1.32092		12310	2.21427	1.75952	1.89536	1.7657		12310	2.18709	2.0265	1.71524	1.58682
	12320	2.21976	2.09911	2.01459	1.1789		12320	2.21773	2.03011	2.00298	1.30512		12320	2.20667	1.77817	1.88475	1.73913		12320	2.19558	2.02819	1.72442	1.59811
	12330	2.22291	2.10398	2.01655	1.17877		12330	2.20959	2.02203	1.99121	1.30807		12330	2.21067	1.79974	1.86413	1.74931		12330	2.19197	2.02465	1.7128	1.60518
	12340	2.2343	2.11473	2.03012	1.17928		12340	2.22759	2.02956	2.00656	1.33377		12340	2.19756	1.7834	1.87657	1.71945		12340	2.19112	2.02546	1.70033	1.61506
	12350	2.22488	2.10487	2.02141	1.17628		12350	2.21545	2.01957	1.99067	1.33229		12350	2.21939	1.77828	1.89869	1.75616		12350	2.19639	2.02753	1.70767	1.61903
	12360	2.20496	2.08247	2.00201	1.17427		12360	2.21615	2.02492	1.99778	1.31575		12360	2.20893	1.76318	1.89693	1.74689		12360	2.20326	2.02689	1.71731	1.62828
	12370	2.22382	2.10394	2.01594	1.18327		12370	2.22067	2.03771	1.99485	1.31571		12370	2.21235	1.79055	1.89084	1.73425		12370	2.19258	2.00967	1.70702	1.6316
	12380	2.22799	2.10614	2.02166	1.1853		12380	2.22413	2.03896	2.00443	1.31087		12380	2.21013	1.80241	1.88807	1.71925		12380	2.19803	2.01763	1.72314	1.61946
	12390	2.22942	2.10673	2.0223	1.18852		12390	2.20571	2.0218	1.97865	1.31438		12390	2.21785	1.8206	1.88078	1.72794		12390	2.19731	2.01578	1.72111	1.62197
	12400	2.22077	2.09539	2.01538	1.18796		12400	2.22316	2.03984	1.99905	1.31443		12400	2.21526	1.82812	1.86792	1.72732		12400	2.20397	2.03358	1.73837	1.59924
	12410	2.22976	2.10901	2.02382	1.18316		12410	2.21263	2.03712	1.98926	1.29786		12410	2.20392	1.81571	1.85539	1.72489		12410	2.19577	2.02627	1.72684	1.59848
	12420	2.23209	2.11305	2.02598	1.18105		12420	2.21362	2.03559	1.99137	1.30042		12420	2.20467	1.8207	1.8518	1.72542		12420	2.18584	2.01561	1.71612	1.59626
	12430	2.23169	2.11378	2.03007	1.17114		12430	2.22619	2.04218	2.00481	1.31227		12430	2.21163	1.82142	1.85182	1.74234		12430	2.19916	2.03551	1.72327	1.59989
	12440	2.23843	2.11986	2.0306	1.18488		12440	2.22717	2.05335	2.00691	1.29485		12440	2.21863	1.821	1.84765	1.76488		12440	2.19412	2.02947	1.69109	1.62782
	12450	2.23582	2.1182	2.03247	1.17477		12450	2.22599	2.05162	2.00204	1.30107		12450	2.21503	1.80352	1.85703	1.76393		12450	2.19472	2.03688	1.6681	1.64381
	12460	2.23506	2.11855	2.02574	1.18286		12460	2.21867	2.05177	1.99491	1.2867		12460	2.21896	1.80393	1.86644	1.76347		12460	2.19982	2.02633	1.67697	1.66137
	12470	2.23081	2.11473	2.0232	1.17798		12470	2.22896	2.06638	2.00402	1.28472		12470	2.20843	1.79257	1.86389	1.75126		12470	2.20817	2.03112	1.68313	1.67142
	12480	2.23045	2.11033	2.02513	1.18117		12480	2.23152	2.07483	2.01095	1.26908		12480	2.21028	1.78323	1.8696	1.75936		12480	2.20029	2.03209	1.66262	1.66998
	12490	2.24404	2.12779	2.0385	1.17832		12490	2.23086	2.07038	2.00912	1.27688		12490	2.21981	1.79045	1.87475	1.77051		12490	2.20457	2.041	1.65898	1.67402
	12500	2.23374	2.11466	2.03052	1.1766		12500	2.21112	2.04058	1.98867	1.28816		12500	2.21047	1.79574	1.87147	1.74508		12500	2.19817	2.04519	1.63255	1.67805
	12510	2.23258	2.11079	2.03143	1.17756		12510	2.21119	2.04509	1.98338	1.28939		12510	2.20598	1.80228	1.86066	1.73852		12510	2.18961	2.03142	1.62232	1.68233
	12520	2.2257	2.10328	2.02779	1.17121		12520	2.20318	2.0394	1.97543	1.28318		12520	2.21371	1.82162	1.85201	1.74723		12520	2.19019	2.03418	1.62622	1.67671
	12530	2.21871	2.09454	2.01982	1.17414		12530	2.20498	2.03896	1.97723	1.28727		12530	2.21371	1.81841	1.86636	1.73527		12530	2.2114	2.05109	1.65757	1.68109
	12540	2.23576	2.1127	2.04144	1.16889		12540	2.21565	2.05618	1.98881	1.27865		12540	2.2244	1.82913	1.88116	1.73535		12540	2.20435	2.03658	1.67926	1.65854
	12550	2.23159	2.11074	2.03063	1.17527		12550	2.21513	2.04679	1.99104	1.28843		12550	2.20775	1.82055	1.88816	1.69374		12550	2.19262	2.02744	1.67638	1.64145
	12560	2.23225	2.10957	2.02837	1.18376		12560	2.20771	2.04739	1.97443	1.28754		12560	2.20627	1.81404	1.88491	1.70047		12560	2.20437	2.02951	1.68554	1.66088
	12570	2.23219	2.11331	2.02787	1.17772		12570	2.20655	2.04717	1.97856	1.27755		12570	2.20583	1.80817	1.88112	1.70977		12570	2.19264	2.02282	1.68153	1.64195
	12580	2.21743	2.09706	2.01116	1.17963		12580	2.21669	2.06457	1.99137	1.26468		12580	2.21539	1.82221	1.89143	1.70821		12580	2.18303	2.01514	1.70293	1.60327
	12590	2.21831	2.09807	2.01169	1.18027		12590	2.21052	2.05917	1.98167	1.26714		12590	2.21368	1.83045	1.8901	1.69639		12590	2.18883	2.03388	1.69063	1.60844
	12600	2.22056	2.1009	2.01474	1.17848		12600	2.21677	2.0635	1.98497	1.27671		12600	2.19946	1.82296	1.84945	1.7122		12600	2.19796	2.04247	1.67337	1.64017
	12610	2.20951	2.08668	2.00342	1.18147		12610	2.22605	2.07704	1.99603	1.26978		12610	2.2	1.81983	1.84657	1.72		12610	2.19246	2.02666	1.67839	1.63995
	12620	2.21636	2.09777	2.00704	1.18136		12620	2.20198	2.04608	1.9665	1.28213		12620	2.20688	1.82473	1.8594	1.7186		12620	2.18377	2.01491	1.66958	1.64025
	12630	2.23109	2.11104	2.02435	1.18366		12630	2.20768	2.05241	1.97623	1.27665		12630	2.21247	1.81768	1.8597	1.74001		12630	2.18709	2.02178	1.67265	1.63749
	12640	2.22683	2.1084	2.02209	1.17615		12640	2.22184	2.06555	1.99312	1.27832		12640	2.20529	1.82017	1.83519	1.74519		12640	2.18798	2.03307	1.64848	1.65034
	12650	2.22556	2.10461	2.01997	1.18175		12650	2.20651	2.04893	1.97675	1.2774		12650	2.20717	1.82711	1.84044	1.73714		12650	2.18789	2.03017	1.67081	1.63111
	12660	2.22899	2.10957	2.02422	1.17858		12660	2.20346	2.04999	1.97322	1.27058		12660	2.20967	1.85201	1.82636	1.73199		12660	2.1963	2.03673	1.6772	1.63896
	12670	2.22558	2.10592	2.01781	1.18319		12670	2.2006	2.04427	1.96765	1.27852		12670	2.20282	1.84301	1.83127	1.7189		12670	2.20037	2.0316	1.66802	1.6654
	12680	2.23457	2.11887	2.02475	1.18213		12680	2.19992	2.04391	1.96693	1.27787		12680	2.20968	1.86155	1.81844	1.73011		12680	2.19821	2.03087	1.67802	1.65047
	12690	2.22925	2.11353	2.02096	1.17808		12690	2.21164	2.05545	1.9844	1.27277		12690	2.21362	1.85727	1.82045	1.74262		12690	2.18827	2.02775	1.67406	1.63179
	12700	2.21927	2.10271	2.00553	1.18607		12700	2.21046	2.05375	1.98141	1.2761		12700	2.21404	1.86777	1.8132	1.74001		12700	2.18891	2.01478	1.6699	1.6537
	12710	2.22754	2.10965	2.01375	1.1908		12710	2.2066	2.05033	1.97182	1.28304		12710	2.20844	1.86547	1.81046	1.73109		12710	2.19659	2.02143	1.69559	1.63977
	12720	2.2254	2.1081	2.01303	1.18677		12720	2.20417	2.04955	1.96074	1.29287		12720	2.21335	1.87385	1.80986	1.73521		12720	2.19345	2.04117	1.66775	1.63543
	12730	2.22208	2.10503	2.00238	1.19775		12730	2.20907	2.05556	1.96302	1.29663		12730	2.20495	1.87063	1.81984	1.70661		12730	2.19159	2.04113	1.65439	1.64405
	12740	2.22037	2.10073	2.00474	1.19498		12740	2.19964	2.04379	1.94927	1.3039		12740	2.21059	1.8667	1.84196	1.70178		12740	2.20172	2.05554	1.65748	1.65006
	12750	2.23002	2.11468	2.01118	1.19549		12750	2.20292	2.05233	1.95165	1.29797		12750	2.21129	1.85806	1.85443	1.69952		12750	2.2026	2.05925	1.65834	1.64691
	12760	2.22891	2.11242	2.01207	1.19388		12760	2.20477	2.05401	1.96007	1.28885		12760	2.20144	1.86911	1.82353	1.69524		12760	2.19659	2.05296	1.6449	1.65217
	12770	2.2302	2.11447	2.01309	1.19333		12770	2.1872	2.02835	1.94203	1.29693		12770	2.20968	1.90237	1.82306	1.68011		12770	2.1836	2.034	1.63409	1.65192
	12780	2.22748	2.11	2.00843	1.19895		12780	2.19348	2.03565	1.94479	1.30254		12780	2.20368	1.89978	1.81598	1.67495		12780	2.20326	2.05846	1.65514	1.65286
	12790	2.22687	2.10871	2.01449	1.18873		12790	2.20336	2.04885	1.95489	1.30008		12790	2.20534	1.90436	1.81529	1.67487		12790	2.20909	2.06261	1.67218	1.64609
	12800	2.22347	2.10107	2.01059	1.19613		12800	2.18687	2.0352	1.94796	1.27599		12800	2.20305	1.91485	1.79612	1.67755		12800	2.21707	2.07854	1.65501	1.66476
	12810	2.23596	2.11029	2.02594	1.20053		12810	2.19698	2.05042	1.95475	1.27601		12810	2.21183	1.93211	1.78994	1.68744		12810	2.21251	2.07577	1.65731	1.65376
	12820	2.22747	2.10095	2.01857	1.19776		12820	2.2001	2.05616	1.95743	1.27339		12820	2.20616	1.93203	1.77963	1.68359		12820	2.20685	2.07511	1.63178	1.66481
	12830	2.22238	2.09607	2.01533	1.19285		12830	2.20559	2.06422	1.9631	1.27063		12830	2.19755	1.91371	1.77884	1.68283		12830	2.20807	2.07736	1.6171	1.67949
	12840	2.22566	2.09984	2.0184	1.19325		12840	2.19764	2.06305	1.94201	1.27739		12840	2.20293	1.89794	1.79274	1.69991		12840	2.20797	2.07689	1.62663	1.6706
	12850	2.22073	2.0973	2.01006	1.19343		12850	2.19604	2.05809	1.94289	1.27852		12850	2.20056	1.89857	1.77635	1.71024		12850	2.19876	2.06791	1.63202	1.65208
	12860	2.22886	2.10406	2.02029	1.19456		12860	2.21016	2.07137	1.9572	1.2839		12860	2.18995	1.89342	1.77507	1.68992		12860	2.1937	2.06365	1.62733	1.64857
	12870	2.24171	2.11715	2.03394	1.19638		12870	2.21751	2.07653	1.97145	1.27909		12870	2.21347	1.90338	1.78265	1.73155		12870	2.19789	2.07039	1.62443	1.65412
	12880	2.24062	2.11862	2.03366	1.19015		12880	2.21285	2.07269	1.97184	1.26856		12880	2.19997	1.89137	1.75948	1.73398		12880	2.19815	2.07191	1.65072	1.62666
	12890	2.2331	2.10668	2.02427	1.19907		12890	2.21384	2.06924	1.97836	1.26749		12890	2.20894	1.88083	1.80264	1.72387		12890	2.20598	2.08028	1.63554	1.65233
	12900	2.23283	2.09807	2.02218	1.21654		12900	2.20708	2.06773	1.97821	1.24641		12900	2.20925	1.88179	1.79056	1.73618		12900	2.19016	2.06235	1.62654	1.64154
	12910	2.23298	2.09914	2.02216	1.21526		12910	2.20184	2.06299	1.97119	1.24684		12910	2.22037	1.88795	1.80473	1.74318		12910	2.20569	2.07845	1.63272	1.65662
	12920	2.23883	2.10532	2.03138	1.21071		12920	2.19689	2.05093	1.96988	1.25134		12920	2.20841	1.86193	1.80422	1.74131		12920	2.21091	2.07638	1.64603	1.65997
	12930	2.23038	2.09168	2.02564	1.21278		12930	2.19736	2.04784	1.97003	1.25783		12930	2.20114	1.84368	1.81111	1.73516		12930	2.21522	2.0779	1.64686	1.66871
	12940	2.24967	2.11276	2.04405	1.21662		12940	2.20357	2.04867	1.97659	1.26784		12940	2.20393	1.83661	1.80587	1.75508		12940	2.20093	2.06296	1.64678	1.64938
	12950	2.21705	2.07343	2.01041	1.22057		12950	2.20201	2.04322	1.9804	1.2653		12950	2.19431	1.83525	1.78364	1.75512		12950	2.19597	2.0535	1.63719	1.65751
	12960	2.22781	2.08791	2.02116	1.21727		12960	2.21206	2.06248	1.98687	1.25895		12960	2.19081	1.83125	1.78061	1.75364		12960	2.20045	2.05658	1.63265	1.67001
	12970	2.22209	2.08117	2.01436	1.21923		12970	2.20957	2.05542	1.98494	1.26478		12970	2.19404	1.82763	1.76305	1.78299		12970	2.1987	2.05271	1.62973	1.673
	12980	2.21995	2.08176	2.01376	1.21137		12980	2.21026	2.05262	1.98171	1.27676		12980	2.20466	1.83825	1.77559	1.78582		12980	2.20534	2.05516	1.64474	1.67278
	12990	2.23054	2.09742	2.02516	1.20422		12990	2.21279	2.06474	1.97992	1.26871		12990	2.20749	1.84427	1.77913	1.7831		12990	2.19832	2.04646	1.64241	1.66724
	13000	2.22823	2.09512	2.01741	1.21267		13000	2.21577	2.06354	1.99025	1.2649		13000	2.19887	1.85284	1.76214	1.76971		13000	2.20348	2.05646	1.65327	1.65781
	13010	2.21707	2.08065	2.00655	1.21467		13010	2.20732	2.05085	1.98225	1.26855		13010	2.19603	1.84331	1.75503	1.77965		13010	2.20194	2.05808	1.64962	1.65535
	13020	2.23068	2.09662	2.02232	1.21089		13020	2.20098	2.05443	1.9732	1.25476		13020	2.19097	1.8218	1.74818	1.79601		13020	2.2162	2.08077	1.66261	1.65204
	13030	2.22755	2.0942	2.01977	1.20782		13030	2.20423	2.06345	1.98068	1.23948		13030	2.20086	1.84949	1.71933	1.81957		13030	2.20323	2.06935	1.65186	1.64245
	13040	2.23889	2.11045	2.03074	1.20308		13040	2.19758	2.05045	1.97094	1.25291		13040	2.20451	1.8316	1.74091	1.82599		13040	2.21015	2.08412	1.66497	1.62906
	13050	2.23617	2.11476	2.02434	1.19615		13050	2.20093	2.055	1.97555	1.24996		13050	2.18773	1.79775	1.74973	1.81077		13050	2.21122	2.08864	1.66676	1.62433
	13060	2.23419	2.11732	2.02168	1.18871		13060	2.19789	2.04751	1.97632	1.25031		13060	2.20986	1.80136	1.77816	1.8331		13060	2.19271	2.07202	1.65937	1.60285
	13070	2.22638	2.10971	2.0097	1.19322		13070	2.19297	2.05232	1.96923	1.23629		13070	2.20022	1.77623	1.76841	1.84382		13070	2.20385	2.07857	1.68503	1.59817
	13080	2.24918	2.13244	2.0346	1.19614		13080	2.21789	2.07547	1.99749	1.24121		13080	2.21347	1.77585	1.79318	1.85196		13080	2.2041	2.08247	1.66989	1.60963
	13090	2.24205	2.11955	2.031	1.19838		13090	2.21314	2.07236	1.9959	1.23194		13090	2.19923	1.76677	1.76777	1.85116		13090	2.20386	2.08116	1.65668	1.62426
	13100	2.24042	2.11831	2.02606	1.20284		13100	2.21591	2.08032	1.99391	1.23171		13100	2.21048	1.78037	1.7714	1.86142		13100	2.19875	2.07319	1.66988	1.60697
	13110	2.23977	2.11367	2.02586	1.2089		13110	2.20992	2.06802	1.98685	1.24227		13110	2.21381	1.78343	1.7805	1.85772		13110	2.20615	2.08267	1.6884	1.5956
	13120	2.23248	2.10471	2.0146	1.21637		13120	2.2018	2.06313	1.98074	1.23125		13120	2.20833	1.76318	1.79107	1.85384		13120	2.2125	2.08708	1.70656	1.58809
	13130	2.23023	2.09986	2.01217	1.22049		13130	2.20919	2.07473	1.98511	1.2312		13130	2.20964	1.76409	1.80459	1.84296		13130	2.20627	2.08843	1.70134	1.57454
	13140	2.24378	2.11225	2.02669	1.22476		13140	2.20399	2.06943	1.98121	1.22777		13140	2.20746	1.76787	1.81555	1.82322		13140	2.19972	2.07875	1.69424	1.57666
	13150	2.23696	2.1048	2.02054	1.22277		13150	2.20647	2.06559	1.98658	1.23444		13150	2.2101	1.7705	1.80907	1.83348		13150	2.20981	2.09224	1.69772	1.5833
	13160	2.24943	2.11552	2.03825	1.22064		13160	2.2084	2.06531	1.98543	1.24365		13160	2.19994	1.75452	1.81115	1.82232		13160	2.20391	2.0876	1.6905	1.58069
	13170	2.24546	2.11891	2.0336	1.20782		13170	2.19952	2.04969	1.9798	1.24698		13170	2.19914	1.75535	1.81306	1.81769		13170	2.20522	2.08964	1.69355	1.57837
	13180	2.23975	2.10198	2.02608	1.22867		13180	2.20431	2.05455	1.98138	1.25339		13180	2.21134	1.7662	1.81027	1.83944		13180	2.20701	2.08857	1.68808	1.59062
	13190	2.2319	2.09657	2.01711	1.22408		13190	2.21485	2.07097	1.99741	1.23795		13190	2.20675	1.77027	1.81554	1.81919		13190	2.20411	2.08374	1.67943	1.59804
	13200	2.22884	2.08616	2.01723	1.23053		13200	2.21665	2.07398	2.00127	1.23312		13200	2.20111	1.75034	1.82455	1.81579		13200	2.21146	2.09092	1.6896	1.59824
	13210	2.22558	2.08631	2.01212	1.22683		13210	2.20987	2.06402	1.98879	1.24562		13210	2.19516	1.73149	1.84009	1.80375		13210	2.20433	2.07879	1.67511	1.6096
	13220	2.23027	2.09079	2.01806	1.22646		13220	2.21212	2.07385	1.99439	1.22821		13220	2.19936	1.74149	1.85074	1.79342		13220	2.20435	2.07746	1.66315	1.6237
	13230	2.23066	2.09683	2.01627	1.22051		13230	2.20334	2.06648	1.98317	1.22724		13230	2.19486	1.75119	1.85821	1.76498		13230	2.21254	2.08803	1.67632	1.61887
	13240	2.22947	2.09606	2.0119	1.22468		13240	2.19576	2.0626	1.97648	1.21736		13240	2.22508	1.76531	1.87852	1.80464		13240	2.20691	2.07939	1.66532	1.62598
	13250	2.22604	2.084	2.00866	1.23802		13250	2.19883	2.06719	1.97331	1.22575		13250	2.19026	1.75166	1.83826	1.77396		13250	2.20877	2.08118	1.65783	1.63635
	13260	2.23386	2.09069	2.01927	1.23768		13260	2.20863	2.07362	1.98892	1.22491		13260	2.20346	1.75628	1.84407	1.79592		13260	2.2073	2.07887	1.64382	1.64939
	13270	2.22393	2.07739	2.00753	1.24339		13270	2.20103	2.0597	1.97746	1.23951		13270	2.1978	1.76911	1.83355	1.78017		13270	2.2004	2.07204	1.66743	1.6155
	13280	2.23515	2.09286	2.01622	1.24363		13280	2.21533	2.07547	1.9942	1.23733		13280	2.19522	1.75941	1.84528	1.77127		13280	2.2093	2.07779	1.68841	1.61061
	13290	2.2252	2.07955	2.00211	1.25301		13290	2.20356	2.06718	1.98043	1.23128		13290	2.20245	1.75969	1.8593	1.77427		13290	2.20841	2.07456	1.68056	1.62051
	13300	2.23596	2.095	2.01331	1.24764		13300	2.19181	2.05906	1.96354	1.22997		13300	2.18485	1.75733	1.84411	1.74876		13300	2.2108	2.0792	1.68074	1.62091
	13310	2.23058	2.0879	2.00674	1.25084		13310	2.20233	2.07278	1.97839	1.22068		13310	2.20918	1.78744	1.8438	1.77945		13310	2.20284	2.07759	1.67548	1.60668
	13320	2.21808	2.0762	1.99728	1.24097		13320	2.20983	2.07304	1.99048	1.22768		13320	2.22124	1.79389	1.8605	1.78559		13320	2.21336	2.08747	1.67708	1.62104
	13330	2.22298	2.0904	1.99795	1.23358		13330	2.21378	2.08513	1.99629	1.21188		13330	2.20121	1.78054	1.8485	1.76165		13330	2.20978	2.08182	1.67611	1.61956
	13340	2.22826	2.09349	2.0081	1.23092		13340	2.21819	2.08687	1.99681	1.22413		13340	2.19771	1.77707	1.83719	1.76823		13340	2.21012	2.08471	1.6841	1.60843
	13350	2.2283	2.09838	2.0019	1.23281		13350	2.21171	2.08189	1.9913	1.21812		13350	2.21598	1.78129	1.86728	1.77803		13350	2.2183	2.09043	1.68982	1.61752
	13360	2.22441	2.09423	2.00223	1.22526		13360	2.217	2.09513	1.98973	1.21721		13360	2.20151	1.76677	1.84307	1.78183		13360	2.215	2.08465	1.71656	1.58748
	13370	2.21742	2.08834	1.99888	1.21542		13370	2.21211	2.09496	1.98693	1.20419		13370	2.19744	1.76463	1.83304	1.78424		13370	2.21336	2.08234	1.72173	1.58033
	13380	2.22195	2.09892	1.99754	1.21592		13380	2.21942	2.104	2.00033	1.1931		13380	2.191	1.76617	1.81142	1.78896		13380	2.20165	2.07199	1.70665	1.57757
	13390	2.23734	2.11818	2.01672	1.20731		13390	2.19914	2.08078	1.97693	1.19773		13390	2.2011	1.79012	1.80709	1.79433		13390	2.21112	2.0763	1.70706	1.59783
	13400	2.22862	2.10641	2.00685	1.21205		13400	2.20654	2.09082	1.98573	1.19287		13400	2.21636	1.79483	1.82192	1.81209		13400	2.20447	2.05839	1.68665	1.62408
	13410	2.2275	2.10961	2.00082	1.21235		13410	2.20626	2.08501	1.98875	1.197		13410	2.20154	1.78991	1.79088	1.81177		13410	2.19717	2.04528	1.67146	1.6365
	13420	2.22654	2.10789	2.0048	1.20521		13420	2.21231	2.09193	1.9968	1.19385		13420	2.21691	1.78315	1.80232	1.8443		13420	2.19811	2.04893	1.66078	1.64532
	13430	2.24128	2.12111	2.01852	1.21372		13430	2.21412	2.09585	1.9976	1.19234		13430	2.20441	1.77355	1.80486	1.82094		13430	2.20749	2.05734	1.67721	1.64327
	13440	2.234	2.11336	2.01004	1.21449		13440	2.213	2.09515	1.99822	1.18836		13440	2.19869	1.76092	1.80731	1.81693		13440	2.2029	2.0591	1.64884	1.6574
	13450	2.22222	2.09736	1.99836	1.21824		13450	2.22599	2.11026	2.01112	1.18838		13450	2.21818	1.79191	1.80274	1.83845		13450	2.21154	2.07118	1.65573	1.65848
	13460	2.22023	2.09768	1.99433	1.21704		13460	2.21545	2.10218	1.99481	1.19081		13460	2.21227	1.77099	1.79559	1.85142		13460	2.19939	2.05075	1.66853	1.63862
	13470	2.22264	2.10045	1.99372	1.22205		13470	2.2093	2.09408	1.9896	1.19094		13470	2.22086	1.77978	1.79686	1.86228		13470	2.19703	2.04547	1.65411	1.65344
	13480	2.21789	2.09418	1.99309	1.21658		13480	2.21983	2.10635	2.00049	1.19022		13480	2.20986	1.77073	1.78578	1.85539		13480	2.21509	2.05419	1.67609	1.66862
	13490	2.21724	2.09465	1.9905	1.21764		13490	2.21763	2.10375	2.00165	1.18463		13490	2.20836	1.75821	1.79749	1.85243		13490	2.21454	2.05459	1.67668	1.66607
	13500	2.22201	2.10073	1.99449	1.21803		13500	2.21057	2.09957	1.9905	1.18445		13500	2.21382	1.76085	1.80343	1.85717		13500	2.20609	2.04559	1.68323	1.64802
	13510	2.23233	2.11509	2.00532	1.21313		13510	2.21142	2.09946	1.9973	1.17636		13510	2.19946	1.7516	1.80472	1.83033		13510	2.20049	2.04787	1.65989	1.65387
	13520	2.24023	2.12351	2.01273	1.21527		13520	2.21321	2.10248	1.99559	1.18062		13520	2.2023	1.74823	1.79742	1.84749		13520	2.20316	2.05861	1.66016	1.64737
	13530	2.22891	2.11125	2.00025	1.21559		13530	2.20429	2.09507	1.98479	1.17857		13530	2.20078	1.75668	1.78756	1.84543		13530	2.20306	2.05271	1.6496	1.66498
	13540	2.23909	2.12305	2.01235	1.21249		13540	2.21178	2.10404	1.99206	1.17841		13540	2.20835	1.76578	1.79685	1.8458		13540	2.2104	2.05827	1.64511	1.68192
	13550	2.2315	2.11537	2.00592	1.20858		13550	2.21536	2.10739	1.99524	1.1805		13550	2.20334	1.76118	1.7865	1.84825		13550	2.21117	2.04001	1.6653	1.68634
	13560	2.22994	2.11337	2.00682	1.20482		13560	2.20063	2.08875	1.98159	1.18151		13560	2.20405	1.73267	1.80402	1.85983		13560	2.20748	2.03782	1.66468	1.67992
	13570	2.23069	2.11522	2.00337	1.21009		13570	2.20935	2.09735	1.98935	1.18575		13570	2.2004	1.71775	1.81489	1.85447		13570	2.19987	2.03623	1.66326	1.66318
	13580	2.2318	2.11367	2.00339	1.21683		13580	2.20161	2.0887	1.98526	1.17909		13580	2.19973	1.70545	1.83202	1.84735		13580	2.20494	2.04208	1.65237	1.68021
	13590	2.2317	2.1108	2.01096	1.20892		13590	2.21052	2.10024	1.99179	1.18093		13590	2.20312	1.71467	1.81685	1.86184		13590	2.20124	2.04057	1.64598	1.6786
	13600	2.23123	2.11447	2.00672	1.20785		13600	2.20989	2.09687	1.98936	1.1886		13600	2.2017	1.70387	1.82837	1.85712		13600	2.20985	2.06193	1.6308	1.68992
	13610	2.23547	2.11972	2.0095	1.20969		13610	2.21786	2.10797	2.00117	1.17881		13610	2.19577	1.71198	1.82847	1.83539		13610	2.19288	2.04594	1.62453	1.67108
	13620	2.22458	2.11004	1.99746	1.20637		13620	2.21387	2.10353	1.99682	1.17912		13620	2.20901	1.71898	1.84649	1.84257		13620	2.20564	2.0577	1.62543	1.68925
	13630	2.23086	2.11805	2.0047	1.20354		13630	2.21496	2.10508	1.99707	1.18001		13630	2.20485	1.70925	1.85582	1.83225		13630	2.21516	2.06153	1.63494	1.70028
	13640	2.23295	2.11871	2.00872	1.20344		13640	2.21638	2.1065	1.99925	1.17911		13640	2.20987	1.72994	1.85212	1.82867		13640	2.20609	2.05572	1.63172	1.68676
	13650	2.22719	2.11416	2.01186	1.18471		13650	2.2186	2.10878	2.00192	1.17887		13650	2.22093	1.73358	1.86904	1.8348		13650	2.2097	2.05912	1.63371	1.69014
	13660	2.2214	2.10802	2.00477	1.18593		13660	2.20956	2.09958	1.98995	1.18159		13660	2.20549	1.72232	1.84571	1.83175		13660	2.20214	2.05753	1.62048	1.68505
	13670	2.21886	2.1029	2.00216	1.18988		13670	2.21743	2.10683	2.00398	1.17446		13670	2.20804	1.72442	1.84162	1.84002		13670	2.20209	2.04982	1.61626	1.69833
	13680	2.22828	2.11454	2.01274	1.18662		13680	2.21009	2.09816	1.99481	1.17789		13680	2.21633	1.73277	1.83141	1.86216		13680	2.20586	2.0497	1.61101	1.71319
	13690	2.22379	2.10776	2.00968	1.18704		13690	2.20784	2.09417	1.99356	1.17869		13690	2.21537	1.72542	1.83472	1.86344		13690	2.2044	2.05644	1.59584	1.71555
	13700	2.22151	2.10729	2.00217	1.192		13700	2.20437	2.09169	1.98522	1.18414		13700	2.20714	1.71345	1.84125	1.84846		13700	2.19793	2.0496	1.59558	1.70734
	13710	2.23523	2.12162	2.0184	1.1905		13710	2.20931	2.09674	1.9927	1.18108		13710	2.21081	1.72747	1.83684	1.84858		13710	2.20562	2.06342	1.58817	1.71742
	13720	2.22009	2.10839	2.00173	1.18546		13720	2.20697	2.08786	1.98821	1.19554		13720	2.20865	1.71117	1.84725	1.84819		13720	2.20885	2.07071	1.59437	1.7112
	13730	2.22626	2.11552	2.00665	1.18758		13730	2.20715	2.0878	1.98769	1.19717		13730	2.22574	1.73189	1.87803	1.83886		13730	2.20355	2.06164	1.58727	1.71507
	13740	2.2211	2.11031	2.00062	1.18772		13740	2.22242	2.10723	2.00477	1.19112		13740	2.21911	1.7259	1.89415	1.81172		13740	2.19593	2.05566	1.56488	1.72326
	13750	2.23058	2.12	2.01604	1.17989		13750	2.22283	2.10713	2.0037	1.19464		13750	2.21796	1.73077	1.89118	1.80737		13750	2.19975	2.06066	1.56239	1.72929
	13760	2.23362	2.12415	2.01501	1.18568		13760	2.22563	2.10899	2.0099	1.19137		13760	2.20608	1.72395	1.8873	1.78876		13760	2.20243	2.06127	1.56126	1.73638
	13770	2.22531	2.11624	2.00789	1.18064		13770	2.21289	2.09363	1.99203	1.20098		13770	2.21402	1.73815	1.89661	1.78479		13770	2.20577	2.07007	1.53545	1.75729
	13780	2.25138	2.14384	2.03635	1.18092		13780	2.21613	2.09067	1.99952	1.20561		13780	2.20739	1.75049	1.87942	1.77447		13780	2.21202	2.07857	1.53953	1.75939
	13790	2.2255	2.11355	2.0086	1.18498		13790	2.20937	2.08799	1.99013	1.20095		13790	2.21716	1.77115	1.86975	1.78849		13790	2.21872	2.08605	1.53595	1.7705
	13800	2.23531	2.12556	2.01799	1.18447		13800	2.19374	2.06675	1.97298	1.20868		13800	2.2142	1.78758	1.853	1.78221		13800	2.21187	2.08297	1.50876	1.78035
	13810	2.22958	2.1188	2.01266	1.18404		13810	2.20022	2.07236	1.98089	1.20967		13810	2.21182	1.78034	1.84594	1.79086		13810	2.22587	2.10721	1.52977	1.76876
	13820	2.2208	2.10783	2.00386	1.18556		13820	2.20714	2.07845	1.98494	1.21779		13820	2.2164	1.78278	1.84571	1.79997		13820	2.20692	2.08498	1.50948	1.76503
	13830	2.22172	2.10882	2.00798	1.18025		13830	2.19591	2.06269	1.97515	1.21989		13830	2.21565	1.76167	1.85557	1.80876		13830	2.21152	2.08796	1.51215	1.77073
	13840	2.21965	2.10847	2.00197	1.18328		13840	2.20988	2.07462	1.9832	1.23692		13840	2.20857	1.75238	1.87047	1.78496		13840	2.20773	2.08601	1.51485	1.76124
	13850	2.22176	2.11228	2.00551	1.17839		13850	2.21017	2.0739	1.98453	1.23707		13850	2.20626	1.73581	1.88409	1.7811		13850	2.21005	2.08676	1.50807	1.77194
	13860	2.23631	2.12924	2.02166	1.17531		13860	2.20667	2.05929	1.98521	1.2478		13860	2.2045	1.71001	1.89237	1.79288		13860	2.21485	2.08786	1.50791	1.78275
	13870	2.22779	2.11884	2.01479	1.17355		13870	2.20771	2.05848	1.98117	1.2592		13870	2.21809	1.72858	1.90433	1.79593		13870	2.2063	2.07683	1.49684	1.78376
	13880	2.2234	2.11421	2.01025	1.17304		13880	2.21238	2.06439	1.98495	1.25997		13880	2.2142	1.71667	1.90962	1.79213		13880	2.21246	2.08584	1.50497	1.78165
	13890	2.22342	2.11669	2.0064	1.17524		13890	2.21177	2.05684	1.98096	1.27635		13890	2.20091	1.71342	1.89269	1.78042		13890	2.21645	2.09437	1.49134	1.79299
	13900	2.2226	2.11236	2.00629	1.1801		13900	2.21986	2.0799	1.99202	1.24958		13900	2.19796	1.70162	1.8854	1.79217		13900	2.20889	2.08351	1.4855	1.79183
	13910	2.23154	2.12219	2.01349	1.18392		13910	2.22204	2.08078	1.98823	1.26185		13910	2.18341	1.6944	1.88169	1.76715		13910	2.21311	2.09329	1.479	1.79621
	13920	2.21633	2.10567	1.99623	1.18552		13920	2.23086	2.08806	2.00148	1.25999		13920	2.19935	1.70368	1.89367	1.78488		13920	2.21486	2.09822	1.48705	1.78812
	13930	2.21494	2.10597	1.99365	1.18412		13930	2.22301	2.06858	1.99022	1.282		13930	2.19957	1.69469	1.88944	1.79841		13930	2.20749	2.08966	1.48613	1.78068
	13940	2.21907	2.10654	2.00039	1.1872		13940	2.22051	2.06557	1.99528	1.27026		13940	2.2045	1.70805	1.90373	1.7827		13940	2.21316	2.09706	1.4826	1.78897
	13950	2.23143	2.12215	2.01418	1.18242		13950	2.22252	2.06462	2.00058	1.27052		13950	2.19908	1.68659	1.90271	1.79082		13950	2.2126	2.08508	1.50126	1.78602
	13960	2.23279	2.12217	2.01093	1.19301		13960	2.21629	2.05977	1.99591	1.26396		13960	2.20088	1.68356	1.91294	1.78719		13960	2.20779	2.07784	1.51183	1.77359
	13970	2.22601	2.11973	2.00645	1.17948		13970	2.22585	2.07466	2.00425	1.26001		13970	2.1994	1.66963	1.91959	1.78948		13970	2.20079	2.06775	1.50622	1.77276
	13980	2.24242	2.13639	2.02345	1.18251		13980	2.21337	2.06797	1.99278	1.24511		13980	2.19533	1.65846	1.91794	1.79165		13980	2.20351	2.06747	1.51589	1.7716
	13990	2.2359	2.12824	2.01884	1.18042		13990	2.22265	2.07582	2.00443	1.24643		13990	2.19147	1.66639	1.9019	1.79193		13990	2.22172	2.07708	1.53567	1.78871
	14000	2.23395	2.12363	2.01684	1.18475		14000	2.21651	2.06681	1.99457	1.25533		14000	2.20064	1.6577	1.92535	1.79741		14000	2.20332	2.0574	1.50748	1.78994
	14010	2.24566	2.13786	2.02536	1.18888		14010	2.22369	2.07603	2.00611	1.24709		14010	2.20036	1.67444	1.92022	1.78667		14010	2.20464	2.06252	1.49795	1.79529
	14020	2.24607	2.13674	2.02238	1.19748		14020	2.22543	2.08177	2.00899	1.23905		14020	2.20425	1.67768	1.9348	1.77747		14020	2.21026	2.06183	1.50248	1.80608
	14030	2.23946	2.12796	2.01802	1.19572		14030	2.22546	2.07794	2.00601	1.25037		14030	2.19827	1.66833	1.91989	1.7876		14030	2.20193	2.062	1.4831	1.80155
	14040	2.24097	2.1307	2.02196	1.18983		14040	2.21811	2.07046	1.99031	1.26169		14040	2.19053	1.6516	1.92095	1.78298		14040	2.20878	2.06819	1.49131	1.80445
	14050	2.23374	2.12053	2.01389	1.19449		14050	2.23072	2.08129	2.00745	1.2612		14050	2.20752	1.6603	1.93095	1.80586		14050	2.21917	2.07584	1.50973	1.80584
	14060	2.23195	2.11535	2.0118	1.20048		14060	2.21497	2.06436	1.98563	1.26803		14060	2.20703	1.66595	1.93305	1.7972		14060	2.211	2.07517	1.49257	1.80082
	14070	2.22756	2.1081	2.01074	1.19872		14070	2.22771	2.0785	2.00207	1.2637		14070	2.20487	1.66858	1.93011	1.79261		14070	2.20251	2.06994	1.49101	1.78726
	14080	2.24776	2.13175	2.03244	1.1957		14080	2.22398	2.07003	2.00096	1.26621		14080	2.21943	1.67598	1.94805	1.8022		14080	2.20588	2.07486	1.48884	1.79168
	14090	2.23595	2.12043	2.02041	1.1919		14090	2.20478	2.05307	1.98021	1.25928		14090	2.20585	1.69596	1.9139	1.78669		14090	2.21848	2.08391	1.50338	1.80014
	14100	2.22781	2.10554	2.01053	1.20447		14100	2.21735	2.06715	1.98897	1.26654		14100	2.21322	1.73399	1.89555	1.78796		14100	2.20726	2.06298	1.51408	1.78765
	14110	2.23792	2.11712	2.02349	1.19994		14110	2.21618	2.06681	1.99019	1.2611		14110	2.20843	1.72661	1.89478	1.78409		14110	2.21457	2.06996	1.52246	1.79054
	14120	2.24886	2.12252	2.03525	1.21135		14120	2.20907	2.05913	1.98606	1.25522		14120	2.20891	1.71139	1.89732	1.7972		14120	2.21425	2.06539	1.5011	1.81292
	14130	2.23308	2.10617	2.01609	1.21358		14130	2.21628	2.06306	2.00047	1.25126		14130	2.20455	1.70945	1.90531	1.77979		14130	2.20529	2.05205	1.499	1.80797
	14140	2.22945	2.09554	2.01469	1.22091		14140	2.20023	2.04466	1.98219	1.25394		14140	2.21328	1.73033	1.90862	1.77774		14140	2.21355	2.05952	1.51738	1.80431
	14150	2.23945	2.10765	2.02213	1.22437		14150	2.21358	2.05629	1.99351	1.26392		14150	2.20082	1.6972	1.90699	1.78049		14150	2.21341	2.05384	1.5202	1.80806
	14160	2.22637	2.0925	2.01409	1.21588		14160	2.20043	2.03665	1.97964	1.27157		14160	2.21222	1.70368	1.90261	1.80704		14160	2.20845	2.05313	1.52925	1.789
	14170	2.22373	2.09411	2.00798	1.2135		14170	2.20659	2.04633	1.98454	1.26972		14170	2.21363	1.71177	1.92541	1.77848		14170	2.20479	2.04979	1.52501	1.78742
	14180	2.23005	2.10314	2.01597	1.20786		14180	2.2073	2.04378	1.97777	1.28676		14180	2.21326	1.72657	1.92058	1.76844		14180	2.21101	2.0573	1.53261	1.78766
	14190	2.24504	2.11468	2.03434	1.21243		14190	2.2171	2.05253	1.9876	1.29135		14190	2.21589	1.72401	1.91295	1.7857		14190	2.20343	2.04906	1.52728	1.78297
	14200	2.24319	2.1117	2.03225	1.21429		14200	2.20722	2.03504	1.9726	1.30811		14200	2.20483	1.71207	1.89863	1.7851		14200	2.20679	2.05316	1.51742	1.79494
	14210	2.23239	2.09923	2.01945	1.21745		14210	2.22439	2.05404	1.98656	1.31542		14210	2.20405	1.71192	1.89435	1.78787		14210	2.20739	2.05725	1.51825	1.79103
	14220	2.22007	2.09126	2.00458	1.21067		14220	2.22851	2.06064	1.98528	1.32096		14220	2.20651	1.69175	1.90847	1.79808		14220	2.20391	2.0472	1.52442	1.78873
	14230	2.23098	2.09806	2.02228	1.20955		14230	2.22124	2.04674	1.97748	1.32976		14230	2.19935	1.67809	1.90966	1.79207		14230	2.20665	2.05419	1.54062	1.77353
	14240	2.22015	2.09251	2.00477	1.20849		14240	2.21964	2.03231	1.97497	1.35009		14240	2.19953	1.6635	1.91571	1.79963		14240	2.21684	2.05902	1.53901	1.7946
	14250	2.23229	2.10228	2.01638	1.21692		14250	2.21355	2.02513	1.97501	1.34082		14250	2.19983	1.67132	1.91924	1.78933		14250	2.21625	2.05521	1.51534	1.81752
	14260	2.22035	2.08297	2.00615	1.22331		14260	2.21075	2.02271	1.97032	1.34214		14260	2.19318	1.67554	1.90565	1.78358		14260	2.22041	2.06024	1.52335	1.81529
	14270	2.22944	2.09462	2.01395	1.22367		14270	2.2097	2.02119	1.96903	1.34285		14270	2.19261	1.67822	1.91596	1.76855		14270	2.19123	2.04043	1.50396	1.78262
	14280	2.2122	2.08137	1.99891	1.20825		14280	2.22236	2.02606	1.98637	1.35173		14280	2.20507	1.67379	1.93055	1.78775		14280	2.19939	2.04996	1.51365	1.78358
	14290	2.22473	2.09277	2.01501	1.20785		14290	2.21697	2.02688	1.97849	1.34436		14290	2.20211	1.68494	1.9199	1.78144		14290	2.20091	2.05673	1.49725	1.79337
	14300	2.21981	2.08357	2.00586	1.2208		14300	2.20883	2.02054	1.96797	1.34253		14300	2.19742	1.66904	1.92044	1.78425		14300	2.2198	2.07442	1.51243	1.80674
	14310	2.22452	2.08922	2.0113	1.21934		14310	2.22466	2.01072	1.98826	1.37914		14310	2.18126	1.64508	1.91598	1.77158		14310	2.20989	2.07126	1.49392	1.80149
	14320	2.23323	2.0987	2.02266	1.21609		14320	2.21089	1.99144	1.97622	1.38012		14320	2.19131	1.65043	1.92001	1.787		14320	2.21668	2.07354	1.49706	1.81289
	14330	2.2248	2.09004	2.01243	1.21709		14330	2.22342	1.99623	1.98766	1.39695		14330	2.19968	1.65837	1.93791	1.78086		14330	2.21226	2.06168	1.46986	1.8377
	14340	2.22759	2.09216	2.02009	1.21094		14340	2.21059	1.96008	1.97494	1.42517		14340	2.19721	1.67281	1.93536	1.76395		14340	2.221	2.06479	1.50226	1.82908
	14350	2.22949	2.09417	2.01626	1.22085		14350	2.21668	1.96211	1.99008	1.42024		14350	2.19256	1.64215	1.93996	1.77609		14350	2.21333	2.04869	1.4995	1.83086
	14360	2.21522	2.079	2.00436	1.21437		14360	2.21387	1.96066	1.97904	1.42886		14360	2.1967	1.652	1.93485	1.78276		14360	2.19835	2.0256	1.48535	1.83197
	14370	2.2252	2.08896	2.0115	1.22194		14370	2.21804	1.95979	1.97836	1.44384		14370	2.20448	1.65021	1.93689	1.80131		14370	2.19497	2.01685	1.49037	1.82947
	14380	2.24052	2.10658	2.03528	1.20821		14380	2.22572	1.96823	1.9831	1.4495		14380	2.20405	1.68162	1.93275	1.77546		14380	2.2059	2.01771	1.50494	1.84282
	14390	2.23488	2.09916	2.03036	1.20852		14390	2.20708	1.94083	1.95964	1.46128		14390	2.19973	1.68309	1.93539	1.76043		14390	2.22677	2.03005	1.52441	1.86334
	14400	2.23387	2.10218	2.02794	1.20362		14400	2.2083	1.93898	1.95906	1.4682		14400	2.20039	1.68541	1.94064	1.75407		14400	2.21276	2.02554	1.53521	1.82562
	14410	2.24424	2.10974	2.03824	1.21152		14410	2.22076	1.94648	1.98212	1.46492		14410	2.20096	1.70214	1.94156	1.73826		14410	2.20298	2.01324	1.53044	1.81958
	14420	2.2341	2.09213	2.03002	1.21835		14420	2.20537	1.94465	1.96599	1.44243		14420	2.20376	1.7059	1.94314	1.7399		14420	2.21083	2.02313	1.52505	1.83215
	14430	2.23527	2.09392	2.03045	1.21887		14430	2.20953	1.94587	1.96773	1.45109		14430	2.21667	1.73045	1.96034	1.72912		14430	2.1974	2.00555	1.51384	1.82843
	14440	2.23407	2.08383	2.02892	1.23423		14440	2.2182	1.95194	1.9788	1.45432		14440	2.20859	1.73284	1.94159	1.72722		14440	2.20006	2.00603	1.5138	1.83434
	14450	2.23731	2.08165	2.02989	1.24796		14450	2.21247	1.94304	1.96772	1.4638		14450	2.22089	1.75535	1.94685	1.73011		14450	2.19691	2.00696	1.51674	1.8233
	14460	2.22646	2.06703	2.01835	1.25217		14460	2.21229	1.93406	1.96919	1.47314		14460	2.21182	1.7482	1.94143	1.72015		14460	2.21111	2.01065	1.53024	1.8422
	14470	2.23706	2.07523	2.03049	1.25673		14470	2.20434	1.92408	1.95938	1.47545		14470	2.2118	1.75419	1.94156	1.71386		14470	2.21328	2.00898	1.53123	1.8484
	14480	2.233	2.0729	2.02546	1.25425		14480	2.19646	1.90065	1.94873	1.49628		14480	2.20553	1.74184	1.93853	1.71372		14480	2.21494	2.0109	1.52876	1.85233
	14490	2.23676	2.07844	2.02869	1.2533		14490	2.20017	1.89866	1.94507	1.51435		14490	2.21398	1.74876	1.96132	1.70249		14490	2.21087	2.00131	1.53344	1.84912
	14500	2.2336	2.06978	2.02663	1.25964		14500	2.19907	1.88438	1.93341	1.54365		14500	2.21508	1.74141	1.96197	1.7121		14500	2.21066	1.9932	1.53399	1.8569
	14510	2.20918	2.04597	1.99726	1.25931		14510	2.19684	1.87007	1.93067	1.55807		14510	2.21605	1.74896	1.97117	1.69627		14510	2.21976	2.00735	1.54864	1.85121
	14520	2.22319	2.06128	2.01042	1.26275		14520	2.19554	1.86381	1.92761	1.56567		14520	2.21011	1.7585	1.955	1.68963		14520	2.20998	1.98589	1.56573	1.8365
	14530	2.21714	2.05557	2.00516	1.25912		14530	2.21257	1.86953	1.94774	1.5818		14530	2.20874	1.76527	1.94623	1.6891		14530	2.19801	1.97272	1.55373	1.83215
	14540	2.23803	2.07068	2.02928	1.26959		14540	2.20775	1.87	1.94262	1.57406		14540	2.21427	1.7748	1.95146	1.68756		14540	2.20523	1.97391	1.5645	1.83905
	14550	2.23508	2.07168	2.02502	1.26436		14550	2.20331	1.86229	1.9353	1.57977		14550	2.1976	1.76347	1.93152	1.67878		14550	2.20511	1.96668	1.56408	1.84684
	14560	2.2221	2.05261	2.00731	1.27788		14560	2.208	1.8655	1.93815	1.58557		14560	2.21642	1.76719	1.96613	1.68416		14560	2.19945	1.95513	1.54059	1.86527
	14570	2.23043	2.06131	2.01427	1.28193		14570	2.21069	1.86114	1.93465	1.60236		14570	2.21732	1.77983	1.97236	1.66583		14570	2.20383	1.96019	1.55789	1.85589
	14580	2.23494	2.06184	2.02068	1.2867		14580	2.19979	1.84235	1.91325	1.61967		14580	2.21106	1.77888	1.96166	1.66284		14580	2.19668	1.95512	1.54482	1.85523
	14590	2.22619	2.0514	2.00759	1.2935		14590	2.21535	1.86153	1.91271	1.64068		14590	2.21385	1.78838	1.97101	1.64897		14590	2.20314	1.95224	1.55191	1.86762
	14600	2.22348	2.05093	2.00741	1.28518		14600	2.21748	1.87007	1.91273	1.63669		14600	2.20541	1.77855	1.96378	1.64559		14600	2.21372	1.96479	1.55563	1.87635
	14610	2.22833	2.05358	2.01847	1.28044		14610	2.2058	1.85169	1.89656	1.64482		14610	2.20455	1.77988	1.96225	1.64366		14610	2.20781	1.96482	1.55146	1.86583
	14620	2.2345	2.04746	2.02376	1.30318		14620	2.1956	1.82973	1.89719	1.64137		14620	2.19945	1.78568	1.94342	1.64608		14620	2.20529	1.95492	1.55624	1.86627
	14630	2.24366	2.05774	2.03505	1.30087		14630	2.19705	1.81916	1.89685	1.65731		14630	2.21022	1.79744	1.93481	1.67209		14630	2.21384	1.96182	1.54808	1.88596
	14640	2.23589	2.05145	2.02594	1.2983		14640	2.20782	1.84276	1.89257	1.66474		14640	2.2029	1.78349	1.92285	1.68147		14640	2.20385	1.95507	1.54083	1.87547
	14650	2.22931	2.05195	2.01619	1.29001		14650	2.18895	1.82695	1.86223	1.66654		14650	2.21555	1.79656	1.94441	1.676		14650	2.21836	1.96957	1.55494	1.88287
	14660	2.23299	2.04942	2.01939	1.3017		14660	2.19735	1.83781	1.87493	1.66248		14660	2.20597	1.80191	1.91296	1.68115		14660	2.2012	1.96439	1.53002	1.86835
	14670	2.21883	2.03168	2.00927	1.29674		14670	2.20688	1.84527	1.89619	1.65532		14670	2.20733	1.79867	1.91354	1.68753		14670	2.2006	1.96584	1.53238	1.86348
	14680	2.2379	2.0476	2.0307	1.30383		14680	2.21227	1.86237	1.90278	1.64296		14680	2.20368	1.78945	1.89696	1.70639		14680	2.20846	1.96944	1.53923	1.8726
	14690	2.22917	2.02549	2.023	1.32032		14690	2.21554	1.8729	1.90963	1.63181		14690	2.21328	1.80208	1.89661	1.71832		14690	2.20286	1.96105	1.55148	1.85806
	14700	2.2239	2.01406	2.01966	1.32515		14700	2.20226	1.85642	1.88834	1.63945		14700	2.2055	1.79104	1.88962	1.71755		14700	2.20576	1.96343	1.54246	1.86989
	14710	2.229	2.01888	2.0278	1.32253		14710	2.2101	1.87309	1.90267	1.62495		14710	2.20501	1.7865	1.90112	1.7083		14710	2.19704	1.96725	1.54082	1.84656
	14720	2.21822	1.99706	2.01479	1.33916		14720	2.19357	1.84058	1.88486	1.638		14720	2.20108	1.78949	1.9044	1.6913		14720	2.20647	1.96728	1.56666	1.84726
	14730	2.22093	2.00013	2.01761	1.33935		14730	2.19785	1.84002	1.88381	1.65126		14730	2.1979	1.77335	1.9179	1.68476		14730	2.2023	1.97029	1.55626	1.84289
	14740	2.22229	2.00531	2.02007	1.33234		14740	2.21565	1.86481	1.89132	1.66242		14740	2.19105	1.75471	1.91488	1.68987		14740	2.19158	1.94275	1.55077	1.8512
	14750	2.2191	2.0088	2.01689	1.32124		14750	2.21048	1.84839	1.88184	1.67767		14750	2.20076	1.75573	1.93795	1.68773		14750	2.19924	1.92418	1.57846	1.86528
	14760	2.22877	2.01506	2.03161	1.32173		14760	2.20113	1.85549	1.86931	1.65916		14760	2.20889	1.76875	1.94574	1.68642		14760	2.20476	1.92339	1.58652	1.87228
	14770	2.23128	2.03556	2.03665	1.29066		14770	2.19553	1.82477	1.87134	1.676		14770	2.20643	1.77025	1.94156	1.68322		14770	2.20118	1.92198	1.59176	1.86082
	14780	2.2253	2.02541	2.02756	1.30023		14780	2.19541	1.82118	1.88123	1.66852		14780	2.20659	1.75534	1.93043	1.71181		14780	2.20407	1.93241	1.60201	1.84802
	14790	2.23273	2.02789	2.03362	1.31233		14790	2.19284	1.83342	1.88063	1.64891		14790	2.20807	1.78626	1.9163	1.69947		14790	2.19887	1.93226	1.59205	1.84439
	14800	2.21703	2.00251	2.01598	1.32525		14800	2.18872	1.83869	1.86903	1.64527		14800	2.19644	1.78637	1.91891	1.66595		14800	2.20703	1.94367	1.58234	1.86019
	14810	2.22711	2.00708	2.02702	1.33523		14810	2.20706	1.85619	1.89089	1.64964		14810	2.20373	1.78253	1.93488	1.67084		14810	2.19308	1.92956	1.59089	1.83442
	14820	2.22834	2.00943	2.02903	1.33276		14820	2.19965	1.84195	1.88115	1.65694		14820	2.21102	1.80775	1.94398	1.65233		14820	2.19447	1.92755	1.58968	1.8409
	14830	2.22123	1.99228	2.01823	1.35104		14830	2.19206	1.83269	1.86335	1.66715		14830	2.20387	1.79256	1.95082	1.64167		14830	2.19833	1.94132	1.58803	1.83705
	14840	2.23225	1.99555	2.0316	1.36244		14840	2.20534	1.84058	1.88361	1.67075		14840	2.21242	1.79236	1.98388	1.62521		14840	2.19459	1.93948	1.57624	1.84021
	14850	2.23507	2.00756	2.03451	1.34965		14850	2.20112	1.83712	1.88081	1.66656		14850	2.20264	1.77985	1.97582	1.62219		14850	2.1975	1.94226	1.561	1.85711
	14860	2.22111	1.99427	2.01405	1.35395		14860	2.20226	1.82197	1.87669	1.69066		14860	2.20033	1.76616	1.97935	1.62657		14860	2.19912	1.94939	1.55311	1.86011
	14870	2.22016	1.98104	2.01127	1.37424		14870	2.19328	1.80836	1.85624	1.70445		14870	2.20297	1.7835	1.98721	1.60507		14870	2.20353	1.94835	1.567	1.85998
	14880	2.22578	1.98823	2.01605	1.37502		14880	2.20334	1.80505	1.86967	1.71917		14880	2.20383	1.76785	1.98338	1.62931		14880	2.18568	1.93937	1.55263	1.83917
	14890	2.23809	2.00195	2.0324	1.37099		14890	2.19597	1.80343	1.85633	1.71646		14890	2.20986	1.77006	1.99077	1.63423		14890	2.20275	1.95172	1.55425	1.86528
	14900	2.24201	2.00437	2.03337	1.37882		14900	2.19641	1.81033	1.85539	1.71134		14900	2.21704	1.76717	2.00543	1.63886		14900	2.19968	1.94757	1.54949	1.86634
	14910	2.22997	1.99558	2.02621	1.36296		14910	2.19709	1.81711	1.85386	1.70754		14910	2.19809	1.75963	1.99984	1.60234		14910	2.20829	1.93871	1.58492	1.86615
	14920	2.23909	1.99666	2.03721	1.37483		14920	2.19774	1.80884	1.86085	1.71039		14920	2.20928	1.75829	2.02426	1.60393		14920	2.20636	1.92143	1.58859	1.87631
	14930	2.23502	1.98775	2.03148	1.38295		14930	2.20023	1.81031	1.86064	1.71546		14930	2.2134	1.74982	2.04202	1.60204		14930	2.20825	1.93816	1.59273	1.85998
	14940	2.23277	1.98796	2.03011	1.37739		14940	2.20849	1.80847	1.85795	1.74135		14940	2.22292	1.73451	2.04568	1.63994		14940	2.21072	1.96255	1.55832	1.86938
	14950	2.22556	1.97149	2.02561	1.38434		14950	2.19824	1.81047	1.84969	1.72201		14950	2.21617	1.74075	2.03991	1.62215		14950	2.20513	1.96484	1.55605	1.8556
	14960	2.22698	1.9695	2.02251	1.39622		14960	2.20538	1.79724	1.84976	1.75377		14960	2.22487	1.74884	2.04546	1.63027		14960	2.19997	1.97553	1.53668	1.84813
	14970	2.2174	1.96693	2.01431	1.38109		14970	2.20212	1.80781	1.84787	1.73663		14970	2.21507	1.73594	2.03575	1.62951		14970	2.20098	1.98403	1.52876	1.84801
	14980	2.23375	1.99448	2.03	1.37129		14980	2.20308	1.79362	1.84339	1.7584		14980	2.20605	1.71615	2.02216	1.64286		14980	2.20655	1.98377	1.53117	1.85954
	14990	2.20543	1.97083	1.99616	1.36347		14990	2.19643	1.78543	1.82707	1.76711		14990	2.19731	1.72577	2.01634	1.61629		14990	2.1844	1.9683	1.51617	1.83581
	15000	2.20746	1.96572	2.0001	1.37162		15000	2.20875	1.79155	1.84329	1.77475		15000	2.2114	1.72824	2.02735	1.63817		15000	2.19036	1.97589	1.51574	1.84221
	15010	2.22485	1.98556	2.02046	1.3694		15010	2.2034	1.80699	1.82798	1.76158		15010	2.20288	1.73789	2.01009	1.62623		15010	2.20011	1.99134	1.52167	1.84393
	15020	2.21678	1.96983	2.0101	1.3811		15020	2.19809	1.78921	1.82222	1.77242		15020	2.20609	1.7367	2.01536	1.62968		15020	2.20517	1.99523	1.51397	1.85809
	15030	2.211	1.96874	2.00216	1.37567		15030	2.19647	1.79393	1.82612	1.75954		15030	2.19679	1.74373	1.98852	1.63004		15030	2.19574	1.98068	1.51393	1.85134
	15040	2.20982	1.96709	2.00171	1.3749		15040	2.20198	1.78511	1.84019	1.76763		15040	2.20315	1.77529	1.98143	1.62174		15040	2.19196	1.98986	1.49067	1.8514
	15050	2.21926	1.97564	2.01468	1.37411		15050	2.19648	1.78964	1.82422	1.7659		15050	2.20628	1.75202	1.99525	1.63852		15050	2.19827	2.00247	1.4787	1.86235
	15060	2.22116	1.98259	2.01371	1.37165		15060	2.19234	1.79534	1.8242	1.74979		15060	2.19375	1.73654	1.98475	1.63411		15060	2.20309	2.01286	1.46785	1.87111
	15070	2.22578	1.97976	2.02047	1.38076		15070	2.19745	1.81541	1.8271	1.73885		15070	2.19181	1.72046	2.00263	1.62404		15070	2.19655	2.01727	1.45652	1.8598
	15080	2.22348	1.98094	2.0166	1.37728		15080	2.21728	1.8448	1.83946	1.74522		15080	2.21012	1.72206	2.01668	1.65431		15080	2.20378	2.03127	1.4456	1.87015
	15090	2.2172	1.96572	2.01173	1.38593		15090	2.20913	1.85315	1.82087	1.73515		15090	2.20853	1.71723	2.02587	1.64382		15090	2.19964	2.03155	1.45245	1.85474
	15100	2.22132	1.97294	2.0191	1.37814		15100	2.20039	1.81664	1.8204	1.75196		15100	2.21065	1.70799	2.02798	1.65651		15100	2.20198	2.02813	1.44872	1.86691
	15110	2.21226	1.97417	2.01005	1.36033		15110	2.20482	1.81291	1.83897	1.74757		15110	2.20358	1.69995	2.02652	1.6477		15110	2.20215	2.03414	1.44779	1.86148
	15120	2.22396	1.95997	2.02108	1.40207		15120	2.19201	1.79538	1.83323	1.73946		15120	2.20991	1.69338	2.0407	1.6539		15120	2.20036	2.02987	1.44833	1.86148
	15130	2.2248	1.96701	2.02377	1.39093		15130	2.18477	1.80373	1.8272	1.71883		15130	2.19329	1.67784	2.0148	1.65725		15130	2.20345	2.0291	1.47798	1.84627
	15140	2.22521	1.99324	2.0226	1.35617		15140	2.19128	1.827	1.84031	1.69668		15140	2.20658	1.70291	2.01191	1.67042		15140	2.19846	2.02431	1.48465	1.83424
	15150	2.20859	1.98014	2.00597	1.34567		15150	2.20079	1.84474	1.84927	1.69235		15150	2.2094	1.70448	2.01982	1.66674		15150	2.20289	2.02869	1.51177	1.81779
	15160	2.2165	1.97745	2.01401	1.36351		15160	2.20086	1.83731	1.85413	1.69531		15160	2.20529	1.69831	2.00578	1.67905		15160	2.18115	1.99237	1.50329	1.81258
	15170	2.2241	1.99014	2.02327	1.35606		15170	2.19679	1.84237	1.84597	1.68815		15170	2.20504	1.70262	2.01576	1.66199		15170	2.19716	2.02066	1.49873	1.82367
	15180	2.21462	1.97872	2.00976	1.36185		15180	2.19746	1.82425	1.84615	1.70923		15180	2.19233	1.69392	2.00137	1.65461		15180	2.19804	2.02271	1.48848	1.8319
	15190	2.21617	1.9964	2.01448	1.33381		15190	2.20939	1.83512	1.86582	1.707		15190	2.19675	1.73536	1.98707	1.64056		15190	2.18965	2.01711	1.48864	1.81778
	15200	2.21463	2.0014	2.01341	1.32277		15200	2.19131	1.83176	1.84548	1.68598		15200	2.21061	1.73739	1.98896	1.67305		15200	2.18428	2.02078	1.46096	1.82324
	15210	2.22545	2.01818	2.02369	1.3179		15210	2.19747	1.83366	1.8573	1.68696		15210	2.19971	1.72855	1.96127	1.68612		15210	2.19661	2.02918	1.47739	1.83029
	15220	2.2255	2.01387	2.02052	1.32949		15220	2.19447	1.8522	1.84979	1.66704		15220	2.20887	1.72898	1.96955	1.69992		15220	2.1983	2.03171	1.45862	1.84653
	15230	2.20843	2.01166	2.00426	1.30019		15230	2.19303	1.83976	1.84934	1.67749		15230	2.19761	1.71581	1.95385	1.70219		15230	2.19671	2.02369	1.46549	1.84609
	15240	2.22938	2.01774	2.03276	1.31792		15240	2.19446	1.80456	1.86426	1.70277		15240	2.2021	1.71513	1.95762	1.71014		15240	2.19222	2.02006	1.45791	1.8454
	15250	2.23165	2.01226	2.03394	1.33208		15250	2.20037	1.81152	1.87113	1.7031		15250	2.19667	1.71662	1.95044	1.70286		15250	2.19229	2.02482	1.45323	1.84406
	15260	2.22218	2.00823	2.02294	1.32322		15260	2.2067	1.81394	1.88466	1.70198		15260	2.21411	1.73819	1.9593	1.71591		15260	2.20513	2.04093	1.46807	1.84515
	15270	2.22555	2.01862	2.02506	1.31546		15270	2.18808	1.80938	1.85772	1.68832		15270	2.2048	1.73621	1.94567	1.70945		15270	2.20047	2.02735	1.46594	1.85067
	15280	2.23112	2.0188	2.03246	1.32262		15280	2.20749	1.82686	1.87264	1.70348		15280	2.2192	1.75682	1.96335	1.70544		15280	2.19246	2.01407	1.46164	1.84958
	15290	2.2163	2.00064	2.01664	1.32458		15290	2.20257	1.82838	1.87143	1.69039		15290	2.20601	1.73883	1.94733	1.70803		15290	2.18727	1.99479	1.48445	1.83999
	15300	2.21642	1.99985	2.01685	1.32585		15300	2.19074	1.82447	1.85086	1.6865		15300	2.21226	1.7487	1.95084	1.71011		15300	2.18844	2.0117	1.46541	1.83961
	15310	2.20932	1.98991	2.00864	1.32958		15310	2.19806	1.8334	1.85264	1.6939		15310	2.21899	1.73966	1.95759	1.72893		15310	2.19297	2.02732	1.45569	1.84097
	15320	2.22201	2.00477	2.02512	1.32455		15320	2.19855	1.81119	1.85536	1.71595		15320	2.21268	1.74961	1.96162	1.6979		15320	2.19919	2.03209	1.45922	1.84775
	15330	2.22114	2.01844	2.02044	1.30793		15330	2.19436	1.82971	1.85079	1.69031		15330	2.20888	1.75257	1.96317	1.68309		15330	2.19471	2.02488	1.4608	1.84375
	15340	2.21952	2.01508	2.019	1.30982		15340	2.2024	1.8321	1.86397	1.69415		15340	2.19647	1.72853	1.95969	1.67951		15340	2.20049	2.01799	1.49515	1.83754
	15350	2.21199	1.99911	2.01292	1.31813		15350	2.19122	1.83581	1.84959	1.67681		15350	2.2022	1.74251	1.96009	1.6796		15350	2.18801	2.0159	1.47003	1.83027
	15360	2.20297	1.99981	1.99687	1.31127		15360	2.199	1.83775	1.84215	1.70306		15360	2.20872	1.757	1.96401	1.67705		15360	2.1966	2.01569	1.48184	1.84155
	15370	2.21401	2.01768	2.00219	1.31297		15370	2.1977	1.83779	1.85046	1.69059		15370	2.20284	1.75746	1.96228	1.66309		15370	2.1977	2.02287	1.48383	1.83468
	15380	2.21848	2.02696	2.0041	1.31084		15380	2.20037	1.83855	1.85286	1.69407		15380	2.21343	1.76433	1.9841	1.65802		15380	2.17891	2.00078	1.47546	1.82077
	15390	2.22956	2.03412	2.02064	1.31196		15390	2.19817	1.81709	1.85528	1.70882		15390	2.21336	1.77095	1.97789	1.6582		15390	2.19529	2.01821	1.49262	1.82689
	15400	2.22738	2.03089	2.02105	1.30892		15400	2.19704	1.82599	1.85008	1.70204		15400	2.21892	1.77356	1.98553	1.66115		15400	2.1877	2.00774	1.48258	1.82839
	15410	2.21969	2.02041	2.01154	1.31365		15410	2.20699	1.82684	1.87175	1.70317		15410	2.2259	1.78161	1.98995	1.6659		15410	2.20078	2.02433	1.48158	1.84226
	15420	2.22942	2.03469	2.02024	1.31123		15420	2.20163	1.81704	1.87427	1.69702		15420	2.23371	1.80204	1.99675	1.65669		15420	2.19834	2.01395	1.4905	1.84059
	15430	2.22085	2.0296	2.01243	1.30199		15430	2.2147	1.85251	1.86684	1.70088		15430	2.2283	1.80654	1.98203	1.65487		15430	2.19331	2.006	1.5106	1.82079
	15440	2.22341	2.03137	2.01892	1.29791		15440	2.20681	1.85758	1.85236	1.69063		15440	2.23351	1.81534	1.99454	1.64423		15440	2.18522	1.99926	1.51931	1.80139
	15450	2.22248	2.03338	2.01386	1.29943		15450	2.19602	1.85457	1.8373	1.68223		15450	2.22398	1.80463	1.99166	1.63364		15450	2.17999	1.99489	1.52059	1.79248
	15460	2.2084	2.01635	2.00183	1.29657		15460	2.19998	1.85319	1.84099	1.69006		15460	2.22633	1.80926	1.98923	1.63786		15460	2.20197	2.02146	1.53315	1.80568
	15470	2.22474	2.03042	2.02345	1.29692		15470	2.21616	1.88171	1.83915	1.70278		15470	2.21212	1.81624	1.98068	1.6016		15470	2.19728	2.01494	1.53401	1.80079
	15480	2.22227	2.0217	2.02657	1.29721		15480	2.21426	1.87758	1.84324	1.69796		15480	2.21063	1.80975	1.97888	1.60704		15480	2.19633	2.03549	1.50101	1.80318
	15490	2.2128	2.00011	2.01596	1.31467		15490	2.21608	1.87515	1.84222	1.70646		15490	2.21166	1.82753	1.96498	1.60681		15490	2.2136	2.04394	1.52144	1.81867
	15500	2.22175	2.01605	2.027	1.3035		15500	2.20506	1.85725	1.85453	1.68401		15500	2.21145	1.81524	1.96741	1.61718		15500	2.2054	2.03028	1.5288	1.80784
	15510	2.21617	2.02548	2.01999	1.28058		15510	2.20357	1.86377	1.86981	1.6558		15510	2.20102	1.8102	1.96736	1.59425		15510	2.19757	2.02934	1.53705	1.78265
	15520	2.2207	2.03602	2.01921	1.2808		15520	2.20626	1.85838	1.88879	1.64744		15520	2.20785	1.80643	1.97463	1.60838		15520	2.20314	2.03541	1.5342	1.79193
	15530	2.21331	2.03063	2.01258	1.27417		15530	2.19727	1.87364	1.87184	1.62533		15530	2.19847	1.79956	1.94234	1.62956		15530	2.20644	2.04678	1.51821	1.80068
	15540	2.21098	2.03009	2.01146	1.26871		15540	2.21114	1.88291	1.88958	1.63169		15540	2.21046	1.81431	1.94417	1.6434		15540	2.19098	2.03292	1.51961	1.77732
	15550	2.23409	2.05186	2.03192	1.28197		15550	2.20574	1.86552	1.88619	1.64095		15550	2.21578	1.81536	1.95347	1.64553		15550	2.18928	2.03405	1.52285	1.76903
	15560	2.22881	2.04677	2.02438	1.28368		15560	2.20009	1.86596	1.87841	1.63419		15560	2.22093	1.83132	1.95449	1.64052		15560	2.21323	2.05746	1.54496	1.78235
	15570	2.24422	2.05787	2.04411	1.28834		15570	2.19604	1.84561	1.87333	1.65212		15570	2.20607	1.8059	1.94925	1.63483		15570	2.20088	2.04279	1.52729	1.78384
	15580	2.21618	2.0298	2.01373	1.28363		15580	2.19142	1.83293	1.86818	1.6598		15580	2.21685	1.8053	1.95381	1.65902		15580	2.1873	2.03101	1.51556	1.77388
	15590	2.21289	2.00635	2.01489	1.30711		15590	2.20167	1.82429	1.87793	1.68526		15590	2.21595	1.80813	1.94162	1.66784		15590	2.2005	2.04285	1.52919	1.78123
	15600	2.22066	2.00898	2.02328	1.31644		15600	2.20379	1.83874	1.88213	1.67031		15600	2.21535	1.81541	1.94696	1.65201		15600	2.20735	2.03944	1.5422	1.79083
	15610	2.21624	2.00497	2.0155	1.31958		15610	2.19902	1.84647	1.87356	1.65882		15610	2.21794	1.8134	1.93663	1.67319		15610	2.22229	2.05607	1.54432	1.80688
	15620	2.22273	2.00303	2.02095	1.33593		15620	2.19734	1.84989	1.85983	1.666		15620	2.21448	1.81368	1.93163	1.6695		15620	2.20847	2.04096	1.53619	1.79701
	15630	2.22073	1.99961	2.0223	1.33235		15630	2.19453	1.85074	1.85608	1.66182		15630	2.21129	1.83271	1.93037	1.64149		15630	2.20026	2.02857	1.53638	1.79074
	15640	2.21698	1.99322	2.02313	1.32815		15640	2.19982	1.84919	1.85921	1.67401		15640	2.21512	1.82878	1.91811	1.67031		15640	2.19904	2.03116	1.53804	1.78337
	15650	2.22503	2.00341	2.02549	1.33613		15650	2.20014	1.86847	1.84596	1.66806		15650	2.20667	1.80894	1.91901	1.66851		15650	2.21125	2.04662	1.5508	1.78483
	15660	2.21139	1.98201	2.01372	1.34054		15660	2.19135	1.85232	1.8449	1.6641		15660	2.21204	1.78988	1.94753	1.67026		15660	2.20714	2.0489	1.5436	1.77827
	15670	2.22831	1.9972	2.03109	1.34782		15670	2.20324	1.86171	1.84863	1.68081		15670	2.20625	1.79168	1.93837	1.66362		15670	2.19912	2.04553	1.53598	1.76885
	15680	2.21512	1.97987	2.01816	1.34932		15680	2.19772	1.84783	1.82869	1.70334		15680	2.20512	1.79832	1.92491	1.66909		15680	2.21266	2.05429	1.55752	1.77362
	15690	2.21695	1.98032	2.02305	1.34737		15690	2.21642	1.84154	1.86845	1.71542		15690	2.21529	1.7957	1.94059	1.68066		15690	2.20139	2.03752	1.55624	1.76603
	15700	2.21354	1.9817	2.02091	1.33725		15700	2.19842	1.82272	1.84605	1.71346		15700	2.20028	1.78766	1.91933	1.67419		15700	2.20554	2.04826	1.54216	1.7763
	15710	2.22348	1.98841	2.03278	1.3423		15710	2.19655	1.81577	1.85008	1.71168		15710	2.19821	1.77261	1.91964	1.68436		15710	2.20114	2.0356	1.55539	1.76836
	15720	2.21049	1.987	2.01758	1.32428		15720	2.2055	1.82649	1.8659	1.70611		15720	2.1961	1.78009	1.9241	1.66578		15720	2.20106	2.04088	1.54679	1.76961
	15730	2.23268	2.01015	2.03798	1.33255		15730	2.20204	1.8354	1.85162	1.70316		15730	2.20138	1.77116	1.9367	1.67461		15730	2.19535	2.02023	1.54467	1.78097
	15740	2.22021	1.98212	2.02237	1.35644		15740	2.1997	1.83153	1.85885	1.69339		15740	2.19057	1.76357	1.94613	1.64304		15740	2.19578	2.0241	1.5372	1.78407
	15750	2.21843	1.99375	2.02262	1.33297		15750	2.19285	1.82016	1.8405	1.70785		15750	2.20615	1.77781	1.95943	1.65355		15750	2.19857	2.02657	1.52602	1.7977
	15760	2.23041	2.00525	2.03753	1.333		15760	2.2033	1.82282	1.85469	1.71654		15760	2.20877	1.8074	1.9661	1.6202		15760	2.20484	2.04634	1.51238	1.80217
	15770	2.21983	1.9896	2.02691	1.33733		15770	2.20134	1.81722	1.86717	1.70387		15770	2.20724	1.80767	1.95831	1.62518		15770	2.19952	2.04692	1.48403	1.81204
	15780	2.21738	1.9848	2.02417	1.34047		15780	2.2155	1.81744	1.87197	1.73481		15780	2.21347	1.81938	1.98128	1.60102		15780	2.20253	2.04799	1.48491	1.81744
	15790	2.2234	1.99676	2.03795	1.32164		15790	2.19393	1.79067	1.85138	1.7299		15790	2.20775	1.7985	1.98086	1.60931		15790	2.19807	2.04044	1.46574	1.83063
	15800	2.21757	1.99397	2.03131	1.31645		15800	2.20297	1.79141	1.86206	1.74061		15800	2.20985	1.80737	1.99083	1.59277		15800	2.20399	2.04305	1.47647	1.83334
	15810	2.21811	2.00496	2.03412	1.29713		15810	2.20233	1.78503	1.87531	1.7313		15810	2.21237	1.83252	1.97937	1.58529		15810	2.20192	2.03955	1.47386	1.83435
	15820	2.21879	1.99309	2.03481	1.3165		15820	2.20744	1.79326	1.87319	1.73809		15820	2.19044	1.80234	1.97592	1.56311		15820	2.20846	2.04403	1.47854	1.84132
	15830	2.2194	1.99696	2.03248	1.31629		15830	2.20022	1.80351	1.85217	1.7317		15830	2.19784	1.79787	1.97815	1.58607		15830	2.2152	2.05595	1.46089	1.85825
	15840	2.21517	1.98649	2.03031	1.32122		15840	2.20813	1.79784	1.86486	1.74405		15840	2.20622	1.82544	1.98141	1.57373		15840	2.20567	2.04427	1.44537	1.86059
	15850	2.21618	1.98818	2.02689	1.32731		15850	2.2119	1.804	1.85968	1.75277		15850	2.19928	1.82306	1.98025	1.55842		15850	2.20585	2.04584	1.44662	1.85833
	15860	2.21719	1.98473	2.02749	1.3349		15860	2.20142	1.78176	1.84584	1.76372		15860	2.20018	1.81223	1.98582	1.56648		15860	2.20792	2.03634	1.46293	1.8609
	15870	2.22267	1.98764	2.02635	1.35045		15870	2.2014	1.78364	1.84311	1.76463		15870	2.19646	1.81017	1.97786	1.56849		15870	2.20346	2.01858	1.48754	1.85015
	15880	2.23013	1.99329	2.03505	1.35366		15880	2.20734	1.77877	1.8543	1.77263		15880	2.21439	1.84151	1.99515	1.56054		15880	2.20102	2.01623	1.50743	1.83069
	15890	2.23111	1.97831	2.03727	1.37534		15890	2.19519	1.76506	1.85352	1.7569		15890	2.1983	1.83223	1.96808	1.56035		15890	2.19966	2.01233	1.49962	1.83812
	15900	2.22028	1.97125	2.02384	1.37022		15900	2.18883	1.75279	1.84825	1.75887		15900	2.20267	1.83721	1.97551	1.5574		15900	2.19158	2.00081	1.49956	1.83144
	15910	2.21882	1.96332	2.02739	1.37165		15910	2.20406	1.75567	1.86344	1.77792		15910	2.21966	1.85546	1.99918	1.55383		15910	2.19328	2.00371	1.49224	1.83829
	15920	2.22398	1.97519	2.02959	1.36807		15920	2.1969	1.73217	1.85856	1.78832		15920	2.21735	1.84269	1.98692	1.57796		15920	2.19821	1.98847	1.51888	1.84479
	15930	2.20733	1.95988	2.01224	1.36176		15930	2.20511	1.74839	1.87299	1.77766		15930	2.21941	1.85178	1.98397	1.57681		15930	2.1866	1.9825	1.50465	1.83527
	15940	2.20844	1.95188	2.01618	1.37098		15940	2.20386	1.74872	1.87036	1.77698		15940	2.21052	1.85774	1.96291	1.57117		15940	2.19007	1.98242	1.5078	1.84103
	15950	2.22049	1.95856	2.02754	1.38356		15950	2.19717	1.74669	1.86871	1.76411		15950	2.20309	1.85864	1.95027	1.56496		15950	2.19891	1.98678	1.49648	1.86646
	15960	2.22971	1.99327	2.03884	1.34657		15960	2.19265	1.72291	1.88365	1.76035		15960	2.20308	1.84177	1.96757	1.56324		15960	2.19929	1.98482	1.48819	1.87603
	15970	2.21782	1.96498	2.02677	1.36695		15970	2.20625	1.72874	1.8916	1.77998		15970	2.20468	1.82876	1.95802	1.59468		15970	2.20056	1.97351	1.49943	1.88199
	15980	2.21578	1.97149	2.02155	1.35865		15980	2.19976	1.71555	1.89181	1.77646		15980	2.21537	1.85013	1.95866	1.59887		15980	2.19843	1.97534	1.50398	1.87145
	15990	2.21746	1.96938	2.02599	1.36058		15990	2.19865	1.74643	1.88301	1.75282		15990	2.20605	1.83784	1.9439	1.60526		15990	2.18798	1.97353	1.49756	1.85391
	16000	2.21961	1.97289	2.02643	1.36186		16000	2.20091	1.7378	1.8719	1.77878		16000	2.19659	1.83461	1.92914	1.60082		16000	2.20385	1.99605	1.49382	1.87034
	16010	2.22443	1.98906	2.03124	1.34683		16010	2.20065	1.74358	1.87128	1.77313		16010	2.21225	1.85362	1.95524	1.59036		16010	2.19925	1.99234	1.49609	1.86163
	16020	2.22017	1.98604	2.02864	1.34111		16020	2.20538	1.75818	1.86637	1.77563		16020	2.20093	1.83738	1.94631	1.58874		16020	2.19373	1.9789	1.49082	1.86715
	16030	2.22324	1.99303	2.0284	1.34125		16030	2.20585	1.754	1.87393	1.77296		16030	2.2089	1.83844	1.95696	1.59654		16030	2.20268	1.99732	1.48108	1.87636
	16040	2.23602	2.01773	2.04033	1.32868		16040	2.20253	1.75952	1.86304	1.77071		16040	2.20373	1.83182	1.94962	1.59884		16040	2.20776	1.99677	1.49046	1.88143
	16050	2.23258	2.01842	2.03595	1.32277		16050	2.20123	1.76834	1.85898	1.76294		16050	2.21811	1.85566	1.96623	1.59074		16050	2.2056	1.98726	1.50509	1.8748
	16060	2.22953	2.03478	2.03223	1.29277		16060	2.19676	1.76449	1.85624	1.75853		16060	2.21636	1.86022	1.96706	1.57947		16060	2.19366	1.97472	1.51226	1.85414
	16070	2.22078	2.02677	2.02035	1.29388		16070	2.19102	1.76659	1.84847	1.75027		16070	2.19894	1.83087	1.95654	1.57813		16070	2.20357	1.99591	1.49626	1.86788
	16080	2.21993	2.02483	2.01918	1.29584		16080	2.18944	1.77988	1.85407	1.72678		16080	2.21423	1.84067	1.97109	1.59134		16080	2.18495	1.97051	1.51207	1.83813
	16090	2.22416	2.03198	2.02672	1.28735		16090	2.20321	1.78235	1.87721	1.73423		16090	2.20237	1.81327	1.96481	1.59762		16090	2.19908	1.98874	1.51054	1.85341
	16100	2.23655	2.05349	2.0392	1.27639		16100	2.19229	1.78374	1.85596	1.72801		16100	2.2178	1.83403	1.98478	1.59194		16100	2.20145	1.98351	1.50461	1.86938
	16110	2.22996	2.05489	2.03365	1.25979		16110	2.19743	1.77361	1.87079	1.73546		16110	2.20721	1.83127	1.97891	1.57285		16110	2.20029	1.9899	1.50182	1.86208
	16120	2.21788	2.05236	2.02092	1.24164		16120	2.20048	1.78451	1.87271	1.72996		16120	2.19761	1.80995	1.96906	1.58299		16120	2.19565	1.986	1.49907	1.8575
	16130	2.22335	2.05443	2.02852	1.24536		16130	2.19577	1.77284	1.85518	1.74874		16130	2.20309	1.82553	1.97149	1.57731		16130	2.19399	1.98649	1.50967	1.84443
	16140	2.22684	2.05165	2.03642	1.24956		16140	2.20636	1.75355	1.86513	1.78393		16140	2.20191	1.80936	1.95841	1.60863		16140	2.18601	1.97682	1.49346	1.84906
	16150	2.23306	2.06297	2.04167	1.24451		16150	2.19438	1.72822	1.85382	1.79088		16150	2.19434	1.80384	1.95366	1.59988		16150	2.19135	1.97298	1.49202	1.86689
	16160	2.22071	2.04855	2.03178	1.24034		16160	2.19566	1.72115	1.8461	1.80869		16160	2.19453	1.82527	1.94686	1.58432		16160	2.19549	1.97744	1.50122	1.86452
	16170	2.22312	2.05457	2.03389	1.23555		16170	2.19602	1.72869	1.84303	1.80551		16170	2.203	1.83391	1.95035	1.59351		16170	2.18292	1.96685	1.49888	1.848
	16180	2.23395	2.0768	2.04303	1.2223		16180	2.19985	1.72225	1.84146	1.82251		16180	2.2035	1.8357	1.95534	1.58673		16180	2.18295	1.97525	1.48376	1.85131
	16190	2.23302	2.07118	2.04506	1.22504		16190	2.21334	1.72401	1.85102	1.84371		16190	2.21229	1.84511	1.9597	1.59487		16190	2.19	1.98465	1.51637	1.83139
	16200	2.2205	2.05997	2.03175	1.22056		16200	2.20841	1.75217	1.82352	1.8327		16200	2.2028	1.85313	1.9625	1.55538		16200	2.1791	1.95206	1.53452	1.82529
	16210	2.23105	2.06959	2.04301	1.22395		16210	2.20292	1.76736	1.80733	1.8209		16210	2.21747	1.87833	1.97515	1.5508		16210	2.18301	1.95382	1.55792	1.81287
	16220	2.23132	2.07507	2.04193	1.21746		16220	2.18979	1.75732	1.80228	1.80387		16220	2.20927	1.87943	1.96489	1.53907		16220	2.18049	1.9476	1.56316	1.80899
	16230	2.22755	2.07516	2.0343	1.21626		16230	2.1931	1.76836	1.79793	1.80546		16230	2.22044	1.8861	1.97048	1.55579		16230	2.18181	1.96422	1.54032	1.8138
	16240	2.21904	2.06981	2.01653	1.22385		16240	2.19656	1.76816	1.80203	1.80999		16240	2.21539	1.87596	1.96665	1.55852		16240	2.19424	1.98007	1.5485	1.81958
	16250	2.21503	2.06852	2.01535	1.2134		16250	2.19931	1.7814	1.78095	1.82448		16250	2.21013	1.87202	1.96055	1.556		16250	2.17881	1.95945	1.54842	1.80482
	16260	2.2246	2.07749	2.02364	1.21924		16260	2.19745	1.75566	1.78585	1.8401		16260	2.2134	1.89327	1.96406	1.53499		16260	2.18667	1.97988	1.54661	1.80308
	16270	2.22801	2.08191	2.02934	1.2147		16270	2.19003	1.73171	1.79966	1.83163		16270	2.21292	1.88467	1.96058	1.54861		16270	2.1815	1.96672	1.55374	1.79883
	16280	2.22152	2.0757	2.02379	1.21082		16280	2.19704	1.75301	1.79776	1.83003		16280	2.20991	1.89411	1.9453	1.54775		16280	2.1875	1.98312	1.54181	1.80566
	16290	2.2315	2.0889	2.03063	1.21337		16290	2.19547	1.7658	1.78667	1.82481		16290	2.19056	1.87497	1.91875	1.54921		16290	2.20056	1.99693	1.5386	1.8248
	16300	2.23492	2.0903	2.03256	1.22028		16300	2.19849	1.74924	1.80396	1.83101		16300	2.21367	1.90579	1.93633	1.55541		16300	2.18436	1.97468	1.5387	1.80996
	16310	2.22332	2.08115	2.02106	1.2126		16310	2.19859	1.73079	1.80691	1.84581		16310	2.21938	1.9107	1.93098	1.57222		16310	2.1983	1.99237	1.54949	1.8151
	16320	2.21376	2.07036	2.01115	1.21259		16320	2.2138	1.72537	1.83258	1.86186		16320	2.21658	1.91536	1.91913	1.57314		16320	2.19851	1.99384	1.54205	1.82032
	16330	2.21866	2.07052	2.02105	1.21375		16330	2.2025	1.70488	1.8253	1.8611		16330	2.20819	1.91718	1.8906	1.58186		16330	2.20732	1.9981	1.56139	1.82048
	16340	2.22813	2.07808	2.03312	1.21536		16340	2.21032	1.72378	1.8317	1.85592		16340	2.21316	1.92462	1.89298	1.58385		16340	2.20707	2.01021	1.55369	1.81313
	16350	2.24368	2.09458	2.04981	1.21623		16350	2.20402	1.73143	1.825	1.84036		16350	2.21754	1.93379	1.8907	1.58766		16350	2.19684	2.00531	1.55009	1.79672
	16360	2.24332	2.09589	2.047	1.21739		16360	2.20191	1.71499	1.82173	1.85391		16360	2.21517	1.93523	1.89188	1.57786		16360	2.20313	2.01614	1.55868	1.79255
	16370	2.23743	2.08314	2.04405	1.22253		16370	2.19682	1.70953	1.82599	1.84265		16370	2.21366	1.92726	1.8842	1.59251		16370	2.19127	2.00378	1.54774	1.78682
	16380	2.23209	2.07359	2.04265	1.22156		16380	2.19424	1.67546	1.8413	1.85251		16380	2.21637	1.92539	1.89478	1.58973		16380	2.20074	2.01057	1.53423	1.81391
	16390	2.23224	2.07939	2.03861	1.21903		16390	2.201	1.67979	1.84337	1.86255		16390	2.21609	1.94361	1.88314	1.5806		16390	2.19651	2.00892	1.54297	1.79801
	16400	2.2234	2.07104	2.02446	1.22449		16400	2.20054	1.70364	1.84004	1.84299		16400	2.20235	1.92825	1.86536	1.58208		16400	2.19632	2.01321	1.55158	1.78528
	16410	2.22767	2.07048	2.02834	1.23451		16410	2.19869	1.71198	1.82323	1.84754		16410	2.20512	1.91458	1.87229	1.59814		16410	2.1991	2.02804	1.5434	1.78242
	16420	2.2275	2.07245	2.02808	1.23098		16420	2.20977	1.70305	1.84696	1.85862		16420	2.1942	1.8976	1.87424	1.58599		16420	2.19237	2.01122	1.53989	1.78794
	16430	2.2359	2.08273	2.03593	1.23116		16430	2.19803	1.70532	1.81803	1.85723		16430	2.21446	1.91929	1.88725	1.6007		16430	2.19947	2.01162	1.53381	1.81002
	16440	2.22638	2.07761	2.02087	1.23009		16440	2.19202	1.69289	1.82755	1.84502		16440	2.20554	1.9058	1.88832	1.5909		16440	2.20888	2.02236	1.53777	1.8176
	16450	2.22674	2.07113	2.02458	1.23621		16450	2.20172	1.70536	1.84458	1.83968		16450	2.20017	1.90099	1.89007	1.57969		16450	2.2067	2.01202	1.54037	1.82156
	16460	2.23022	2.08156	2.02637	1.2283		16460	2.20433	1.69002	1.86016	1.84438		16460	2.20671	1.90593	1.89064	1.59123		16460	2.19626	2.00603	1.52624	1.81481
	16470	2.23119	2.08201	2.02926	1.22629		16470	2.20045	1.71057	1.8562	1.82		16470	2.21193	1.91084	1.90828	1.57874		16470	2.19938	1.99938	1.54162	1.81671
	16480	2.22493	2.08209	2.02422	1.21164		16480	2.20624	1.71969	1.8616	1.81992		16480	2.21645	1.89685	1.91479	1.60027		16480	2.18227	1.98427	1.51892	1.81112
	16490	2.24248	2.10351	2.04244	1.20877		16490	2.20725	1.70408	1.86964	1.82879		16490	2.21025	1.89945	1.89752	1.60058		16490	2.18735	1.98921	1.54112	1.79916
	16500	2.23292	2.09412	2.03155	1.20802		16500	2.20333	1.68144	1.88174	1.82787		16500	2.22283	1.90253	1.91388	1.61225		16500	2.19486	1.99519	1.54687	1.8059
	16510	2.22541	2.08675	2.0215	1.20991		16510	2.2004	1.68034	1.88515	1.81829		16510	2.20309	1.88718	1.88904	1.60539		16510	2.19792	1.99686	1.55614	1.80353
	16520	2.22245	2.08272	2.02082	1.20711		16520	2.19823	1.67712	1.88759	1.81347		16520	2.20635	1.89748	1.87702	1.61627		16520	2.19738	1.99694	1.55836	1.80019
	16530	2.2184	2.07886	2.01537	1.20798		16530	2.19676	1.6705	1.88872	1.81485		16530	2.2212	1.89234	1.90815	1.62649		16530	2.2002	2.00485	1.55295	1.80297
	16540	2.22302	2.09008	2.01874	1.19996		16540	2.20489	1.66045	1.89763	1.83437		16540	2.19967	1.87611	1.87862	1.62113		16540	2.19471	2.00206	1.55639	1.78968
	16550	2.22593	2.09336	2.02284	1.19812		16550	2.19576	1.64462	1.89297	1.83156		16550	2.21303	1.86708	1.89758	1.64566		16550	2.18779	2.00632	1.5336	1.78762
	16560	2.223	2.09003	2.01791	1.20134		16560	2.20173	1.65251	1.87196	1.86018		16560	2.20916	1.86826	1.89523	1.63661		16560	2.18938	1.99415	1.5438	1.79633
	16570	2.22534	2.08918	2.02548	1.19878		16570	2.19778	1.64975	1.88086	1.84422		16570	2.20281	1.85247	1.89803	1.63419		16570	2.1893	1.9909	1.53601	1.8064
	16580	2.21844	2.08017	2.01837	1.20085		16580	2.20608	1.635	1.88506	1.87268		16580	2.20042	1.84617	1.90037	1.63217		16580	2.18895	1.98916	1.55073	1.79484
	16590	2.22864	2.08657	2.03588	1.19795		16590	2.19944	1.63349	1.86387	1.87956		16590	2.20961	1.84609	1.9059	1.65052		16590	2.19964	2.00268	1.55723	1.80032
	16600	2.23133	2.08643	2.03895	1.20299		16600	2.19822	1.63926	1.85999	1.87553		16600	2.20464	1.84299	1.9019	1.64531		16600	2.19775	2.0019	1.55891	1.79511
	16610	2.22851	2.08896	2.03546	1.19403		16610	2.20126	1.61888	1.87295	1.88743		16610	2.19538	1.84787	1.89593	1.6218		16610	2.1917	1.99566	1.55281	1.79254
	16620	2.23403	2.09279	2.0442	1.19301		16620	2.20265	1.61871	1.87577	1.88801		16620	2.21062	1.85842	1.90308	1.64264		16620	2.20253	2.00826	1.55752	1.8009
	16630	2.21562	2.07196	2.02978	1.18527		16630	2.1945	1.64511	1.87216	1.84939		16630	2.20476	1.8478	1.90807	1.63304		16630	2.1984	2.00752	1.56467	1.78539
	16640	2.22619	2.07748	2.03593	1.20452		16640	2.20464	1.65168	1.89238	1.84709		16640	2.19935	1.82699	1.91591	1.63269		16640	2.21435	2.02617	1.58272	1.78783
	16650	2.226	2.07865	2.03766	1.19887		16650	2.1931	1.64191	1.88198	1.83893		16650	2.21281	1.84906	1.94062	1.61495		16650	2.20414	2.00914	1.57435	1.78919
	16660	2.22847	2.07593	2.04291	1.20381		16660	2.19913	1.61176	1.88965	1.87184		16660	2.20688	1.85096	1.93206	1.60676		16660	2.20438	2.01586	1.56105	1.79388
	16670	2.23644	2.08583	2.04836	1.207		16670	2.20986	1.6082	1.90383	1.88575		16670	2.1989	1.85177	1.91703	1.60196		16670	2.20534	2.02496	1.55966	1.78719
	16680	2.23622	2.08014	2.0526	1.20879		16680	2.20409	1.61521	1.88203	1.88815		16680	2.19658	1.85858	1.89488	1.614		16680	2.19436	2.00749	1.55882	1.78058
	16690	2.22787	2.06093	2.04647	1.22123		16690	2.19251	1.60432	1.88388	1.86852		16690	2.19341	1.85738	1.88449	1.61892		16690	2.19295	2.00689	1.56662	1.77092
	16700	2.22694	2.06062	2.04774	1.21618		16700	2.20011	1.60785	1.88344	1.88373		16700	2.21164	1.89053	1.89303	1.6202		16700	2.17567	1.97862	1.57967	1.74836
	16710	2.22379	2.0529	2.03878	1.23265		16710	2.19322	1.61245	1.87606	1.87104		16710	2.20454	1.87817	1.88929	1.61959		16710	2.18983	2.00326	1.60134	1.73591
	16720	2.22433	2.05162	2.04321	1.22941		16720	2.19941	1.60231	1.88776	1.88249		16720	2.19779	1.86701	1.89011	1.61317		16720	2.18194	2.00211	1.59236	1.72559
	16730	2.226	2.04754	2.04942	1.2319		16730	2.20094	1.60179	1.8956	1.87864		16730	2.2063	1.88194	1.87686	1.63438		16730	2.1941	2.01349	1.60516	1.73133
	16740	2.21885	2.04467	2.04034	1.22592		16740	2.21294	1.6034	1.90658	1.89428		16740	2.1943	1.86188	1.86741	1.63588		16740	2.17921	2.00387	1.58635	1.72219
	16750	2.23436	2.06243	2.06111	1.21777		16750	2.20509	1.59133	1.90604	1.88668		16750	2.20091	1.85582	1.88957	1.63507		16750	2.19957	2.02077	1.61006	1.73217
	16760	2.22824	2.05868	2.05401	1.21368		16760	2.19967	1.58479	1.89748	1.88814		16760	2.2023	1.85889	1.89073	1.63398		16760	2.19625	2.01806	1.60519	1.73143
	16770	2.2255	2.04923	2.0562	1.21588		16770	2.19558	1.58303	1.89047	1.88714		16770	2.19285	1.84009	1.88955	1.63122		16770	2.19804	2.01981	1.61067	1.72883
	16780	2.23132	2.04992	2.06999	1.21265		16780	2.20731	1.57736	1.89881	1.91072		16780	2.20458	1.83246	1.90819	1.64962		16780	2.20041	2.02027	1.63529	1.71114
	16790	2.23383	2.05381	2.06653	1.2212		16790	2.20703	1.54725	1.90942	1.92409		16790	2.20346	1.82199	1.92681	1.63652		16790	2.20658	2.02461	1.6549	1.703
	16800	2.22767	2.05476	2.05749	1.21234		16800	2.2037	1.53063	1.90307	1.936		16800	2.2005	1.82231	1.93264	1.62125		16800	2.19639	2.01555	1.64654	1.69551
	16810	2.23514	2.06795	2.06338	1.20736		16810	2.20704	1.53302	1.90571	1.93912		16810	2.20596	1.83565	1.93143	1.62248		16810	2.20843	2.02714	1.6591	1.70071
	16820	2.22462	2.05752	2.05007	1.20901		16820	2.20331	1.53107	1.89929	1.93847		16820	2.20903	1.83725	1.94587	1.61175		16820	2.1962	2.02286	1.63464	1.69781
	16830	2.2346	2.06633	2.06213	1.21025		16830	2.21029	1.53569	1.90243	1.9476		16830	2.19595	1.82482	1.92385	1.61655		16830	2.19964	2.03045	1.64294	1.68965
	16840	2.22981	2.0552	2.05446	1.2245		16840	2.1992	1.53566	1.88857	1.93597		16840	2.20071	1.83668	1.92136	1.619		16840	2.19361	2.02145	1.65109	1.67673
	16850	2.22116	2.04317	2.04547	1.22827		16850	2.2031	1.52283	1.90177	1.94206		16850	2.20998	1.85987	1.9241	1.61453		16850	2.19589	2.02803	1.65421	1.67169
	16860	2.22343	2.03304	2.05074	1.24437		16860	2.21051	1.5138	1.91471	1.95321		16860	2.20845	1.87769	1.91234	1.60367		16860	2.19656	2.02759	1.65167	1.67648
	16870	2.22685	2.03427	2.05533	1.24704		16870	2.20241	1.52847	1.89152	1.94607		16870	2.20929	1.87863	1.91363	1.60334		16870	2.20828	2.04527	1.65912	1.67846
	16880	2.22973	2.03141	2.06008	1.25412		16880	2.20014	1.52927	1.88172	1.9498		16880	2.20208	1.88567	1.91481	1.57354		16880	2.20442	2.04554	1.66503	1.66204
	16890	2.22027	2.02706	2.04538	1.25166		16890	2.19271	1.52407	1.87646	1.94217		16890	2.1954	1.87224	1.90395	1.58406		16890	2.1962	2.04262	1.65318	1.65568
	16900	2.24087	2.04695	2.0689	1.25404		16900	2.20053	1.5325	1.8799	1.94989		16900	2.21447	1.88196	1.94009	1.58177		16900	2.20823	2.06114	1.65718	1.66073
	16910	2.22875	2.03617	2.05836	1.24573		16910	2.21659	1.54023	1.90305	1.9577		16910	2.21781	1.88546	1.95067	1.57394		16910	2.19685	2.0516	1.67673	1.62228
	16920	2.21661	2.02597	2.04024	1.24885		16920	2.20875	1.54337	1.89738	1.94297		16920	2.21824	1.89673	1.95326	1.55831		16920	2.19969	2.05674	1.6769	1.62331
	16930	2.22077	2.03864	2.04423	1.23639		16930	2.20068	1.53919	1.88931	1.93582		16930	2.21406	1.89421	1.94266	1.56273		16930	2.19568	2.05325	1.67001	1.62396
	16940	2.22059	2.03586	2.04675	1.2362		16940	2.20234	1.53805	1.89323	1.93668		16940	2.23253	1.90932	1.96515	1.56878		16940	2.19357	2.05398	1.63711	1.65062
	16950	2.22329	2.037	2.05202	1.23528		16950	2.19937	1.53008	1.8854	1.94385		16950	2.21003	1.88696	1.94485	1.55738		16950	2.19987	2.05652	1.64152	1.65983
	16960	2.22197	2.03733	2.04879	1.23533		16960	2.20457	1.52006	1.89558	1.95358		16960	2.19929	1.86828	1.93673	1.55961		16960	2.19491	2.05793	1.63113	1.65518
	16970	2.22387	2.04283	2.0466	1.23672		16970	2.21083	1.5201	1.89894	1.96439		16970	2.20795	1.863	1.95107	1.57246		16970	2.19031	2.05737	1.62284	1.65182
	16980	2.22099	2.04153	2.04692	1.22796		16980	2.20611	1.48306	1.9072	1.97408		16980	2.20048	1.85187	1.9437	1.5738		16980	2.19845	2.06782	1.64525	1.63819
	16990	2.21663	2.03369	2.04817	1.2231		16990	2.2192	1.47026	1.9303	1.99047		16990	2.21145	1.85546	1.95675	1.5841		16990	2.20404	2.07221	1.65707	1.63574
	17000	2.21	2.02108	2.04042	1.23293		17000	2.2084	1.48705	1.9154	1.96824		17000	2.20869	1.85923	1.94178	1.59042		17000	2.19772	2.06365	1.63139	1.65524
	17010	2.2175	2.02844	2.05591	1.22198		17010	2.22188	1.50768	1.92859	1.97001		17010	2.20616	1.86256	1.93722	1.58503		17010	2.20511	2.06584	1.62906	1.67435
	17020	2.22128	2.03366	2.06201	1.21679		17020	2.20958	1.49593	1.91948	1.96018		17020	2.20648	1.86133	1.94757	1.57466		17020	2.21325	2.07234	1.6313	1.6856
	17030	2.21507	2.01895	2.05933	1.22316		17030	2.20738	1.47745	1.92277	1.96599		17030	2.20742	1.84909	1.95703	1.57996		17030	2.20361	2.06169	1.62231	1.68206
	17040	2.22169	2.0216	2.06508	1.23303		17040	2.22081	1.49824	1.9258	1.97751		17040	2.21371	1.85259	1.9699	1.57747		17040	2.21046	2.06048	1.62111	1.70254
	17050	2.21494	2.02389	2.05655	1.21915		17050	2.19934	1.48134	1.90223	1.96504		17050	2.2023	1.84446	1.96629	1.55946		17050	2.2113	2.0665	1.61822	1.70019
	17060	2.22436	2.03228	2.06683	1.22212		17060	2.20932	1.46495	1.92518	1.97733		17060	2.21894	1.85397	1.98095	1.57671		17060	2.20941	2.06557	1.62635	1.68861
	17070	2.2221	2.0341	2.06542	1.21324		17070	2.21657	1.44557	1.93154	2.00146		17070	2.21318	1.85214	1.97255	1.57322		17070	2.20695	2.05835	1.62347	1.69374
	17080	2.22578	2.04189	2.06673	1.21142		17080	2.21692	1.43461	1.93384	2.00788		17080	2.22153	1.84768	1.97459	1.59922		17080	2.21339	2.06117	1.63075	1.70013
	17090	2.22203	2.04264	2.05991	1.20798		17090	2.21111	1.43259	1.92553	2.0045		17090	2.21207	1.81532	1.96581	1.6207		17090	2.20031	2.04423	1.64006	1.6775
	17100	2.21818	2.02629	2.06002	1.2211		17100	2.20828	1.44201	1.92058	1.99625		17100	2.20163	1.82482	1.95374	1.59601		17100	2.18716	2.02835	1.62676	1.67536
	17110	2.21226	2.01371	2.05297	1.23225		17110	2.19727	1.43743	1.91232	1.98313		17110	2.2144	1.82002	1.97348	1.61246		17110	2.19037	2.03253	1.62129	1.68395
	17120	2.21283	2.01254	2.0523	1.23733		17120	2.21266	1.45151	1.92718	1.99269		17120	2.20798	1.8369	1.9576	1.59497		17120	2.20781	2.05585	1.63878	1.68426
	17130	2.21138	2.01761	2.04802	1.23096		17130	2.20569	1.44086	1.91673	1.99504		17130	2.20866	1.84339	1.95692	1.59019		17130	2.1967	2.05125	1.62516	1.67399
	17140	2.21687	2.02154	2.05491	1.23276		17140	2.22284	1.46894	1.92923	2.00058		17140	2.20373	1.82998	1.95409	1.59549		17140	2.20431	2.05975	1.64706	1.6621
	17150	2.21646	2.02069	2.05675	1.22965		17150	2.21196	1.48844	1.90913	1.98123		17150	2.20637	1.82902	1.94549	1.61429		17150	2.20462	2.06779	1.64655	1.65344
	17160	2.23463	2.04081	2.07546	1.23074		17160	2.20729	1.48173	1.90746	1.97744		17160	2.20134	1.82121	1.95598	1.59661		17160	2.20128	2.06557	1.62491	1.66865
	17170	2.21723	2.02417	2.06218	1.21753		17170	2.20603	1.49356	1.89648	1.97632		17170	2.20864	1.84251	1.94636	1.60408		17170	2.19985	2.06771	1.6084	1.67817
	17180	2.22249	2.03046	2.06447	1.22236		17180	2.20983	1.5294	1.89613	1.95763		17180	2.20209	1.83489	1.94119	1.60106		17180	2.1954	2.06058	1.61132	1.6725
	17190	2.21735	2.0296	2.05799	1.21602		17190	2.21844	1.51465	1.91419	1.97095		17190	2.20529	1.83851	1.941	1.60594		17190	2.20659	2.07468	1.63159	1.66485
	17200	2.22463	2.03156	2.06875	1.22105		17200	2.21081	1.49315	1.91496	1.96945		17200	2.20303	1.82284	1.95543	1.60006		17200	2.20656	2.07411	1.62262	1.67421
	17210	2.21533	2.02434	2.05851	1.21656		17210	2.21644	1.49118	1.9281	1.97079		17210	2.21158	1.84611	1.95963	1.59181		17210	2.19858	2.06953	1.59905	1.68154
	17220	2.21874	2.03113	2.06031	1.2146		17220	2.21657	1.48629	1.94359	1.95954		17220	2.20814	1.82702	1.95767	1.60664		17220	2.18683	2.06007	1.58297	1.67773
	17230	2.21327	2.02259	2.06164	1.20661		17230	2.22796	1.49713	1.95903	1.96174		17230	2.19405	1.81018	1.93926	1.60942		17230	2.19889	2.07017	1.59544	1.685
	17240	2.22716	2.03461	2.07546	1.21378		17240	2.23253	1.49559	1.97371	1.95858		17240	2.21137	1.83363	1.95695	1.60886		17240	2.19592	2.07407	1.58365	1.68357
	17250	2.22136	2.03685	2.06535	1.20602		17250	2.23588	1.48071	1.98002	1.97112		17250	2.20822	1.83456	1.94671	1.61157		17250	2.20036	2.07693	1.58099	1.6941
	17260	2.22223	2.03346	2.06988	1.20718		17260	2.23463	1.48789	1.9883	1.95447		17260	2.2088	1.83535	1.94582	1.61336		17260	2.1966	2.07263	1.60249	1.66922
	17270	2.21897	2.02918	2.06835	1.20499		17270	2.22025	1.48468	1.97534	1.9372		17270	2.20874	1.84729	1.94811	1.5967		17270	2.1986	2.07342	1.61591	1.66055
	17280	2.21502	2.02256	2.06622	1.20524		17280	2.23268	1.48453	1.98159	1.95938		17280	2.2114	1.85114	1.96376	1.58036		17280	2.20599	2.08045	1.61338	1.67377
	17290	2.20967	2.01686	2.05632	1.21208		17290	2.22496	1.47374	1.97154	1.9601		17290	2.22278	1.8367	1.99541	1.58945		17290	2.20124	2.07485	1.62533	1.65656
	17300	2.21616	2.02329	2.0637	1.2125		17300	2.23217	1.47201	1.97899	1.97026		17300	2.20577	1.8209	1.98475	1.57351		17300	2.21775	2.09104	1.62381	1.68156
	17310	2.21998	2.02683	2.06574	1.21709		17310	2.23047	1.46156	1.97853	1.97465		17310	2.21315	1.83188	1.98391	1.58252		17310	2.22292	2.09136	1.62034	1.69807
	17320	2.2261	2.03776	2.07699	1.20193		17320	2.22679	1.45801	1.97912	1.96836		17320	2.20913	1.82297	1.97311	1.59504		17320	2.20973	2.08794	1.5886	1.69784
	17330	2.21651	2.03197	2.06955	1.18908		17330	2.23311	1.46329	1.9849	1.97295		17330	2.21766	1.8436	1.97739	1.58969		17330	2.20799	2.08629	1.59474	1.68957
	17340	2.21372	2.02632	2.07092	1.18593		17340	2.22745	1.45447	1.98172	1.96987		17340	2.20809	1.84865	1.95664	1.58285		17340	2.21648	2.09412	1.60489	1.69249
	17350	2.22079	2.03807	2.07211	1.19017		17350	2.22339	1.45502	1.98266	1.9593		17350	2.21828	1.85255	1.96424	1.59729		17350	2.21441	2.08987	1.6044	1.69281
	17360	2.23933	2.05545	2.08915	1.1999		17360	2.22108	1.45677	1.98497	1.95042		17360	2.20218	1.83093	1.94302	1.60361		17360	2.21966	2.09337	1.61459	1.69255
	17370	2.23478	2.04971	2.08207	1.20503		17370	2.2354	1.45897	1.99679	1.96934		17370	2.21025	1.82605	1.95656	1.61488		17370	2.20264	2.07765	1.62277	1.6593
	17380	2.23581	2.0462	2.08393	1.2116		17380	2.23209	1.45916	1.99447	1.96402		17380	2.20695	1.82427	1.94663	1.61986		17380	2.20156	2.07029	1.63142	1.65715
	17390	2.23355	2.05152	2.07916	1.20244		17390	2.22874	1.44889	1.98266	1.97593		17390	2.21301	1.83085	1.94145	1.63509		17390	2.19833	2.07162	1.63642	1.64189
	17400	2.22312	2.04109	2.06831	1.20024		17400	2.2238	1.43606	1.97284	1.984		17400	2.20388	1.82977	1.92576	1.63021		17400	2.2135	2.08815	1.63513	1.66287
	17410	2.24168	2.06055	2.09623	1.1875		17410	2.23022	1.44356	1.97797	1.98783		17410	2.197	1.80875	1.93427	1.625		17410	2.19766	2.07044	1.61501	1.66267
	17420	2.22722	2.04275	2.08161	1.18958		17420	2.22042	1.43775	1.96145	1.9865		17420	2.21427	1.79055	1.96282	1.65748		17420	2.20394	2.07985	1.6288	1.65408
	17430	2.22915	2.04466	2.07985	1.19659		17430	2.21691	1.43612	1.95409	1.98707		17430	2.20743	1.78788	1.95646	1.6496		17430	2.19897	2.06957	1.63232	1.65027
	17440	2.22648	2.03898	2.0764	1.20233		17440	2.23213	1.44309	1.96917	2.00118		17440	2.20505	1.79068	1.95559	1.64123		17440	2.19302	2.06347	1.63288	1.64147
	17450	2.23183	2.04529	2.08229	1.20124		17450	2.2219	1.47512	1.94915	1.97447		17450	2.21575	1.78488	1.96496	1.66502		17450	2.19922	2.07803	1.64749	1.62503
	17460	2.23457	2.04863	2.08825	1.19539		17460	2.23553	1.48485	1.95753	1.98959		17460	2.20383	1.79181	1.9456	1.64858		17460	2.19794	2.07641	1.64957	1.62151
	17470	2.23811	2.04919	2.09054	1.20366		17470	2.22595	1.4657	1.95424	1.98554		17470	2.21657	1.78724	1.95425	1.67721		17470	2.20523	2.08975	1.67235	1.60073
	17480	2.23015	2.03826	2.07638	1.21708		17480	2.21866	1.45348	1.95952	1.97297		17480	2.22484	1.81753	1.95218	1.66895		17480	2.19344	2.07578	1.66044	1.59888
	17490	2.23633	2.04256	2.08238	1.2223		17490	2.22583	1.44615	1.97142	1.98261		17490	2.21725	1.80524	1.95293	1.66119		17490	2.1905	2.07084	1.66823	1.58909
	17500	2.23321	2.04011	2.07777	1.22281		17500	2.2156	1.43663	1.95077	1.98705		17500	2.20533	1.76594	1.95016	1.6749		17500	2.2002	2.08049	1.66755	1.60393
	17510	2.23712	2.0398	2.08392	1.22713		17510	2.22369	1.43477	1.96132	1.99606		17510	2.21619	1.7827	1.95505	1.6801		17510	2.19646	2.07814	1.65663	1.60804
	17520	2.23223	2.04299	2.07861	1.21295		17520	2.2213	1.44743	1.95859	1.98424		17520	2.2125	1.77302	1.95106	1.68526		17520	2.19057	2.07187	1.6497	1.60718
	17530	2.22819	2.03775	2.07307	1.21642		17530	2.213	1.45375	1.94918	1.9703		17530	2.20215	1.77443	1.93459	1.67561		17530	2.20086	2.0755	1.66657	1.61319
	17540	2.23224	2.04459	2.07286	1.22012		17540	2.2148	1.45592	1.95461	1.96737		17540	2.21633	1.75911	1.96224	1.69688		17540	2.19608	2.07104	1.65371	1.61913
	17550	2.23748	2.05004	2.08088	1.21652		17550	2.21851	1.44059	1.95807	1.98348		17550	2.21888	1.74914	1.98318	1.68948		17550	2.18505	2.06069	1.6299	1.62663
	17560	2.23022	2.04466	2.06944	1.21843		17560	2.22486	1.45298	1.95462	1.99208		17560	2.21763	1.76057	1.98401	1.67327		17560	2.19317	2.06716	1.633	1.63712
	17570	2.22607	2.03716	2.06211	1.22819		17570	2.21889	1.44698	1.9589	1.97886		17570	2.22196	1.77285	1.98019	1.67632		17570	2.19443	2.06826	1.61741	1.6545
	17580	2.23607	2.05263	2.07202	1.22207		17580	2.21957	1.45879	1.95653	1.97406		17580	2.20707	1.7615	1.96752	1.66381		17580	2.18009	2.04346	1.62022	1.64462
	17590	2.2341	2.04974	2.06828	1.22605		17590	2.22083	1.46828	1.94944	1.97687		17590	2.20677	1.77638	1.95372	1.66346		17590	2.19248	2.05219	1.64968	1.63738
	17600	2.22268	2.03199	2.06694	1.21629		17600	2.22705	1.47004	1.95194	1.98708		17600	2.21386	1.77389	1.96457	1.67217		17600	2.19052	2.04737	1.64888	1.63897
	17610	2.22639	2.0318	2.06865	1.22722		17610	2.20957	1.45692	1.94023	1.96909		17610	2.20086	1.75047	1.94358	1.68698		17610	2.19873	2.04408	1.68001	1.63344
	17620	2.23261	2.04047	2.07382	1.22674		17620	2.20777	1.4536	1.93401	1.97362		17620	2.20994	1.76199	1.95269	1.68821		17620	2.20697	2.05917	1.68644	1.63008
	17630	2.22708	2.03956	2.06505	1.22293		17630	2.21854	1.46502	1.94453	1.979		17630	2.20955	1.76691	1.963	1.67001		17630	2.20029	2.06257	1.6763	1.61814
	17640	2.23399	2.04687	2.07248	1.22337		17640	2.21814	1.46001	1.94576	1.98058		17640	2.2106	1.77624	1.97448	1.64921		17640	2.19486	2.05668	1.66753	1.61995
	17650	2.22291	2.03228	2.04897	1.24669		17650	2.21533	1.45791	1.94305	1.9785		17650	2.20704	1.7545	1.97808	1.65861		17650	2.19229	2.05175	1.66921	1.61751
	17660	2.22917	2.03769	2.05786	1.24557		17660	2.22576	1.4646	1.94997	1.99011		17660	2.21118	1.74324	1.98468	1.67356		17660	2.19972	2.05802	1.65574	1.64334
	17670	2.22251	2.03437	2.05971	1.22394		17670	2.21412	1.48289	1.9184	1.98126		17670	2.20619	1.72936	1.98425	1.67529		17670	2.19547	2.05592	1.64621	1.6442
	17680	2.23035	2.04146	2.07126	1.22117		17680	2.22168	1.52294	1.91728	1.96886		17680	2.20093	1.73349	1.98145	1.66043		17680	2.18834	2.05131	1.64812	1.62894
	17690	2.22237	2.03352	2.0656	1.21488		17690	2.22372	1.50304	1.92899	1.9773		17690	2.19695	1.73787	1.97555	1.65233		17690	2.19159	2.0566	1.64401	1.63516
	17700	2.22426	2.03676	2.06102	1.22413		17700	2.2213	1.50723	1.92587	1.9717		17700	2.20561	1.74196	1.98493	1.65983		17700	2.19508	2.05874	1.66003	1.62561
	17710	2.22684	2.04047	2.05758	1.23306		17710	2.21491	1.52861	1.91029	1.95597		17710	2.21649	1.74305	2.00032	1.66918		17710	2.19564	2.06206	1.67978	1.60248
	17720	2.21843	2.0318	2.04528	1.23754		17720	2.20437	1.5154	1.9149	1.93784		17720	2.21248	1.73541	1.99556	1.67219		17720	2.19692	2.06431	1.69238	1.58978
	17730	2.21836	2.02925	2.04507	1.24178		17730	2.20263	1.49804	1.91311	1.9491		17730	2.20577	1.72266	1.9822	1.6835		17730	2.19707	2.06331	1.68852	1.59559
	17740	2.21253	2.02268	2.03259	1.25217		17740	2.20579	1.49564	1.91721	1.95407		17740	2.2124	1.71463	1.99604	1.69272		17740	2.19798	2.06905	1.70046	1.57788
	17750	2.21096	2.02417	2.03555	1.23935		17750	2.20652	1.49719	1.91458	1.9571		17750	2.21212	1.69688	2.00571	1.69842		17750	2.19653	2.06776	1.71817	1.55619
	17760	2.22408	2.03349	2.04887	1.24904		17760	2.20197	1.49664	1.90843	1.95328		17760	2.22111	1.67137	2.01757	1.7328		17760	2.20129	2.07294	1.70465	1.57748
	17770	2.22831	2.03952	2.04972	1.25287		17770	2.19783	1.49241	1.90741	1.94819		17770	2.22908	1.64596	2.04402	1.74655		17770	2.20155	2.07681	1.70426	1.57352
	17780	2.22728	2.04015	2.04584	1.25456		17780	2.20326	1.48189	1.92083	1.95529		17780	2.21022	1.63392	2.02946	1.72678		17780	2.19383	2.06801	1.69159	1.57722
	17790	2.23222	2.04459	2.04498	1.26623		17790	2.19995	1.44825	1.92378	1.97009		17790	2.21358	1.66285	2.03953	1.69561		17790	2.19709	2.07334	1.69536	1.57523
	17800	2.23717	2.05386	2.04893	1.2623		17800	2.22859	1.45096	1.95026	2.00611		17800	2.21785	1.67948	2.04436	1.68453		17800	2.2123	2.08893	1.71402	1.57704
	17810	2.23082	2.04519	2.03918	1.26965		17810	2.21182	1.4602	1.92614	1.98548		17810	2.20633	1.6835	2.03976	1.6556		17810	2.20223	2.07407	1.69638	1.5875
	17820	2.23676	2.05385	2.04583	1.26588		17820	2.21148	1.46158	1.92192	1.98779		17820	2.20584	1.66898	2.03658	1.67282		17820	2.20193	2.07592	1.69977	1.58059
	17830	2.22667	2.04019	2.03218	1.27435		17830	2.21193	1.4502	1.92748	1.99174		17830	2.21043	1.68742	2.04099	1.66102		17830	2.19693	2.06786	1.70369	1.57303
	17840	2.23943	2.05321	2.03532	1.29304		17840	2.21329	1.45142	1.93465	1.98692		17840	2.19984	1.68426	2.02807	1.65191		17840	2.19686	2.06761	1.70114	1.57591
	17850	2.22738	2.03936	2.02483	1.28978		17850	2.20791	1.42996	1.92975	1.99524		17850	2.19279	1.69003	2.02569	1.63003		17850	2.21061	2.08087	1.70856	1.58884
	17860	2.2273	2.03949	2.01553	1.30378		17860	2.20819	1.43946	1.92405	1.99454		17860	2.20331	1.70772	2.0344	1.62912		17860	2.19796	2.06617	1.68278	1.60038
	17870	2.23694	2.05485	2.01388	1.31517		17870	2.21028	1.42841	1.93453	1.99698		17870	2.20557	1.70754	2.04217	1.62571		17870	2.20083	2.07105	1.70092	1.58271
	17880	2.23683	2.05444	2.00758	1.32504		17880	2.21132	1.45787	1.92605	1.98617		17880	2.20518	1.70762	2.0507	1.61379		17880	2.20025	2.07057	1.69409	1.58901
	17890	2.2328	2.046	2.00269	1.33188		17890	2.21215	1.4536	1.92954	1.98774		17890	2.20064	1.69533	2.04863	1.61698		17890	2.18567	2.05144	1.68143	1.58703
	17900	2.23153	2.03965	2.00639	1.33179		17900	2.21266	1.42428	1.94088	1.99903		17900	2.19948	1.6663	2.05004	1.64201		17900	2.20291	2.06681	1.69284	1.60258
	17910	2.22906	2.0386	1.99469	1.34268		17910	2.2209	1.41098	1.95256	2.01529		17910	2.20496	1.68172	2.0525	1.63792		17910	2.20161	2.06204	1.68184	1.61665
	17920	2.23956	2.05186	2.00718	1.33879		17920	2.2061	1.41225	1.93835	1.99552		17920	2.21361	1.67546	2.06505	1.65183		17920	2.18895	2.05541	1.66931	1.60364
	17930	2.23214	2.04826	2.00824	1.31776		17930	2.21706	1.41523	1.94716	2.00909		17930	2.20241	1.67682	2.05667	1.63082		17930	2.20918	2.06973	1.68096	1.62834
	17940	2.23477	2.04959	2.03356	1.28538		17940	2.2096	1.39227	1.95425	2.0018		17940	2.20448	1.68992	2.06166	1.61655		17940	2.20981	2.0815	1.68322	1.61266
	17950	2.23529	2.05113	2.0462	1.26452		17950	2.20917	1.40448	1.94716	1.99921		17950	2.20477	1.69081	2.05645	1.62302		17950	2.19536	2.06476	1.67428	1.60397
	17960	2.22885	2.05036	2.02541	1.27644		17960	2.21584	1.41772	1.94859	2.00323		17960	2.19579	1.67163	2.04365	1.63466		17960	2.19889	2.06549	1.69406	1.59191
	17970	2.2411	2.0663	2.01675	1.30698		17970	2.20661	1.40501	1.9394	2.00074		17970	2.20827	1.67131	2.05433	1.6551		17970	2.21359	2.08091	1.71345	1.59182
	17980	2.24327	2.06683	2.00949	1.32465		17980	2.20894	1.40656	1.93694	2.00717		17980	2.20913	1.65589	2.05865	1.66747		17980	2.20537	2.06747	1.69792	1.60309
	17990	2.2446	2.06809	2.00644	1.33178		17990	2.21419	1.42565	1.92714	2.01467		17990	2.21173	1.67922	2.05886	1.65071		17990	2.20483	2.06887	1.6999	1.59771
	18000	2.23758	2.05858	2.0104	1.31682		18000	2.21382	1.40836	1.93159	2.02176		18000	2.21177	1.6723	2.05176	1.6666		18000	2.21064	2.08223	1.70649	1.58937
	18010	2.2526	2.07762	2.01922	1.32463		18010	2.21324	1.42278	1.92297	2.0186		18010	2.20841	1.68585	2.04263	1.65521		18010	2.21086	2.08369	1.7034	1.59139
	18020	2.23247	2.06109	1.99233	1.323		18020	2.21742	1.42589	1.92987	2.019		18020	2.2076	1.67176	2.03431	1.67745		18020	2.21171	2.08533	1.70622	1.58857
	18030	2.24338	2.06805	1.99174	1.3497		18030	2.20577	1.42514	1.91259	2.01042		18030	2.20718	1.68112	2.02574	1.67735		18030	2.21897	2.09131	1.691	1.61697
	18040	2.24695	2.07064	2.00087	1.34408		18040	2.20405	1.43032	1.91	2.00542		18040	2.21833	1.68426	2.03474	1.69265		18040	2.21126	2.0856	1.68044	1.61422
	18050	2.23445	2.05893	1.98658	1.34158		18050	2.19878	1.43021	1.90738	1.99642		18050	2.20695	1.6831	2.02279	1.67831		18050	2.20753	2.08314	1.67833	1.60939
	18060	2.24315	2.06705	2.00627	1.32877		18060	2.22165	1.43215	1.9365	2.01752		18060	2.22045	1.69773	2.0326	1.68733		18060	2.20744	2.08448	1.69434	1.59052
	18070	2.23124	2.05842	1.98958	1.32715		18070	2.2086	1.42638	1.91988	2.0088		18070	2.21182	1.70566	2.01781	1.67435		18070	2.20335	2.07777	1.68521	1.59764
	18080	2.24426	2.07098	2.00791	1.32392		18080	2.22976	1.41707	1.95194	2.03114		18080	2.2141	1.71284	2.01856	1.67214		18080	2.20916	2.08142	1.70561	1.58724
	18090	2.24476	2.07817	1.99718	1.33055		18090	2.22948	1.42093	1.94488	2.03458		18090	2.19839	1.6783	2.00235	1.68514		18090	2.20822	2.07386	1.70009	1.60041
	18100	2.24129	2.07046	2.00046	1.32592		18100	2.21403	1.407	1.93062	2.02407		18100	2.2062	1.70567	2.01292	1.66537		18100	2.20544	2.07494	1.68922	1.60282
	18110	2.25183	2.08275	2.01275	1.32381		18110	2.20883	1.3939	1.93399	2.01857		18110	2.19588	1.6893	2.01014	1.65812		18110	2.21373	2.08166	1.70296	1.60245
	18120	2.23708	2.06646	2.00092	1.31721		18120	2.20581	1.39124	1.92438	2.02298		18120	2.20777	1.70168	2.01171	1.67504		18120	2.22233	2.07936	1.70841	1.6233
	18130	2.24265	2.07359	2.00717	1.31547		18130	2.21722	1.40039	1.93221	2.0341		18130	2.20282	1.68855	2.00267	1.6861		18130	2.20474	2.06159	1.67941	1.62825
	18140	2.25295	2.08413	2.01928	1.31547		18140	2.21667	1.41357	1.92344	2.03209		18140	2.20747	1.71927	2.00977	1.65855		18140	2.20824	2.05983	1.69364	1.62521
	18150	2.24601	2.07843	2.00753	1.31872		18150	2.22429	1.39265	1.9415	2.04597		18150	2.19825	1.71561	2.00669	1.64148		18150	2.2217	2.08052	1.72103	1.60669
	18160	2.24446	2.07229	2.00566	1.32597		18160	2.22047	1.4018	1.93941	2.03337		18160	2.21835	1.72147	2.02808	1.66301		18160	2.21034	2.06947	1.70432	1.60743
	18170	2.24219	2.06847	2.00729	1.32176		18170	2.22075	1.39769	1.94834	2.02827		18170	2.21246	1.72629	2.01829	1.6542		18170	2.22992	2.09271	1.71778	1.61706
	18180	2.23931	2.07056	2.00526	1.31178		18180	2.22144	1.40459	1.94717	2.02615		18180	2.21152	1.73832	2.00817	1.65141		18180	2.20613	2.06852	1.70268	1.59879
	18190	2.23673	2.07074	2.00155	1.30836		18190	2.20335	1.40946	1.91964	2.00946		18190	2.21521	1.73185	2.01587	1.65869		18190	2.22279	2.09266	1.73088	1.58318
	18200	2.25077	2.08693	2.01238	1.31415		18200	2.21592	1.4043	1.93139	2.02935		18200	2.2096	1.72255	2.01815	1.65064		18200	2.21535	2.08421	1.73415	1.56981
	18210	2.24425	2.07401	2.00935	1.31694		18210	2.20603	1.39148	1.92027	2.02719		18210	2.22125	1.72014	2.03944	1.65824		18210	2.22447	2.09409	1.74008	1.5759
	18220	2.23619	2.06747	2.00989	1.29882		18220	2.20474	1.39447	1.91861	2.02389		18220	2.20714	1.7038	2.03162	1.64697		18220	2.22071	2.08211	1.74186	1.57919
	18230	2.23689	2.0694	2.02268	1.27817		18230	2.2031	1.40992	1.91383	2.01413		18230	2.20583	1.70684	2.0249	1.6486		18230	2.20349	2.06286	1.72288	1.57703
	18240	2.24526	2.07085	2.03683	1.28268		18240	2.19608	1.41074	1.91431	1.99769		18240	2.20794	1.70876	2.02017	1.65804		18240	2.22238	2.08717	1.71942	1.60165
	18250	2.24642	2.07312	2.04611	1.26825		18250	2.20492	1.42152	1.91395	2.00984		18250	2.20664	1.73759	2.01408	1.6318		18250	2.208	2.0701	1.68764	1.61773
	18260	2.24002	2.06786	2.04024	1.26364		18260	2.20338	1.40961	1.9156	2.01327		18260	2.20233	1.73972	2.00071	1.63433		18260	2.21004	2.07117	1.72146	1.58601
	18270	2.24044	2.0683	2.04238	1.26092		18270	2.19823	1.40489	1.90933	2.01125		18270	2.20283	1.75347	1.99441	1.62868		18270	2.22141	2.09061	1.72353	1.59001
	18280	2.24333	2.06797	2.04881	1.26134		18280	2.20545	1.39416	1.92311	2.02138		18280	2.20355	1.76048	1.99143	1.62672		18280	2.20439	2.06719	1.70811	1.5899
	18290	2.23559	2.058	2.03133	1.2783		18290	2.20633	1.40731	1.92566	2.01174		18290	2.2109	1.7445	2.00392	1.6484		18290	2.20744	2.05847	1.71045	1.60706
	18300	2.22663	2.04729	2.01697	1.28692		18300	2.20336	1.41285	1.92027	2.0065		18300	2.21542	1.75612	2.00573	1.64598		18300	2.20916	2.06579	1.72847	1.58295
	18310	2.24891	2.07397	2.03525	1.29291		18310	2.20671	1.40947	1.92702	2.00975		18310	2.20443	1.75207	1.99708	1.63123		18310	2.20492	2.05538	1.72839	1.58475
	18320	2.24306	2.06808	2.02466	1.29864		18320	2.20254	1.39743	1.92451	2.01142		18320	2.20755	1.76399	1.99387	1.63076		18320	2.20717	2.05471	1.73505	1.5846
	18330	2.24624	2.07496	2.01834	1.30843		18330	2.21138	1.40175	1.94179	2.0112		18330	2.22355	1.78668	1.99742	1.64512		18330	2.19533	2.03574	1.71854	1.59415
	18340	2.2435	2.07783	2.02039	1.2912		18340	2.22509	1.40268	1.9595	2.02359		18340	2.21372	1.78285	1.99053	1.63106		18340	2.21417	2.06144	1.75656	1.57163
	18350	2.24321	2.07895	2.01074	1.30341		18350	2.22081	1.38396	1.9678	2.01901		18350	2.21922	1.77323	2.0037	1.64034		18350	2.20931	2.06111	1.73405	1.58336
	18360	2.23939	2.07782	2.01002	1.29313		18360	2.21743	1.38268	1.95459	2.02529		18360	2.21821	1.77942	1.99151	1.64573		18360	2.21443	2.06549	1.71744	1.60983
	18370	2.24226	2.0815	2.01184	1.29435		18370	2.1952	1.39309	1.92937	1.99367		18370	2.21525	1.7826	1.98042	1.64771		18370	2.20134	2.05211	1.6995	1.61008
	18380	2.23999	2.07835	2.01385	1.2884		18380	2.18475	1.39581	1.92254	1.9753		18380	2.20935	1.77034	1.97716	1.64898		18380	2.21907	2.07069	1.72967	1.60282
	18390	2.23689	2.07553	2.01229	1.28461		18390	2.21093	1.40962	1.94701	1.99963		18390	2.20416	1.73765	1.96425	1.68491		18390	2.2162	2.06938	1.71788	1.60926
	18400	2.23282	2.07322	2.00466	1.2861		18400	2.20333	1.42854	1.92188	1.99373		18400	2.19326	1.71963	1.95102	1.69033		18400	2.20323	2.05691	1.69225	1.61675
	18410	2.24717	2.08863	2.0147	1.29543		18410	2.2041	1.42634	1.92859	1.99052		18410	2.19911	1.72308	1.9467	1.70691		18410	2.20645	2.06438	1.69147	1.61683
	18420	2.22968	2.07449	1.97893	1.31273		18420	2.2011	1.42034	1.92722	1.9895		18420	2.20191	1.72637	1.94999	1.70705		18420	2.21427	2.07267	1.68801	1.63115
	18430	2.23338	2.07772	1.97943	1.31943		18430	2.2072	1.41732	1.92264	2.00952		18430	2.20397	1.73626	1.94172	1.71175		18430	2.21009	2.07011	1.7038	1.60647
	18440	2.22406	2.06498	1.97827	1.30966		18440	2.21684	1.41812	1.92847	2.02453		18440	2.21038	1.73436	1.95198	1.71852		18440	2.19603	2.05928	1.70234	1.5832
	18450	2.24346	2.08645	1.99252	1.32017		18450	2.22169	1.42239	1.92977	2.03092		18450	2.19566	1.7186	1.95208	1.69635		18450	2.21202	2.08263	1.69071	1.60943
	18460	2.22778	2.06905	1.98449	1.30646		18460	2.21905	1.42388	1.92407	2.02951		18460	2.19475	1.71857	1.95437	1.69139		18460	2.21254	2.07697	1.70238	1.60586
	18470	2.23563	2.07876	1.99443	1.30273		18470	2.22528	1.4283	1.92507	2.03908		18470	2.19693	1.71046	1.95707	1.70212		18470	2.22187	2.08298	1.7287	1.59567
	18480	2.22903	2.06697	1.9886	1.30775		18480	2.21496	1.43409	1.90836	2.02821		18480	2.21074	1.71717	1.97471	1.71072		18480	2.2167	2.07698	1.71603	1.60277
	18490	2.23472	2.07039	1.99676	1.30936		18490	2.229	1.43342	1.92379	2.04482		18490	2.20021	1.7079	1.95909	1.71079		18490	2.20302	2.06421	1.71365	1.58399
	18500	2.23297	2.06631	1.99662	1.31004		18500	2.21337	1.39468	1.92132	2.03995		18500	2.19411	1.69792	1.95052	1.71488		18500	2.20311	2.06284	1.72079	1.57828
	18510	2.23798	2.072	2.00774	1.30113		18510	2.20283	1.3802	1.91786	2.03021		18510	2.19495	1.69771	1.95206	1.71546		18510	2.20812	2.06175	1.73351	1.57979
	18520	2.24096	2.07751	2.00724	1.30337		18520	2.21966	1.39888	1.92223	2.04987		18520	2.19826	1.69592	1.96004	1.71662		18520	2.21547	2.06541	1.73449	1.59443
	18530	2.22198	2.05596	1.97627	1.31978		18530	2.21736	1.4039	1.91815	2.04528		18530	2.19827	1.69875	1.95768	1.71653		18530	2.20233	2.04204	1.73434	1.58828
	18540	2.24164	2.08024	2.00009	1.3123		18540	2.2146	1.39007	1.9219	2.04522		18540	2.20469	1.70168	1.97205	1.71366		18540	2.20427	2.04219	1.74738	1.57915
	18550	2.23347	2.07035	1.99179	1.31268		18550	2.19914	1.4068	1.90009	2.02065		18550	2.2069	1.67915	1.98278	1.72911		18550	2.19578	2.03394	1.73623	1.57845
	18560	2.23057	2.07065	1.97408	1.32903		18560	2.20827	1.39198	1.91457	2.03709		18560	2.18658	1.65532	1.97927	1.70432		18560	2.19002	2.03812	1.73056	1.56322
	18570	2.24881	2.09057	1.98758	1.33914		18570	2.20411	1.41116	1.91274	2.01649		18570	2.19926	1.64856	1.99448	1.72562		18570	2.20131	2.04864	1.74173	1.56876
	18580	2.24715	2.08619	1.9767	1.35641		18580	2.20794	1.40591	1.91425	2.02709		18580	2.20223	1.65677	1.99232	1.72782		18580	2.19508	2.03489	1.72822	1.58404
	18590	2.23758	2.07846	1.94297	1.38506		18590	2.19924	1.40713	1.91108	2.01025		18590	2.20234	1.65388	1.9952	1.72756		18590	2.19021	2.0313	1.73024	1.57294
	18600	2.23811	2.07544	1.93337	1.40459		18600	2.20866	1.40602	1.91503	2.02783		18600	2.19875	1.65099	1.99712	1.71896		18600	2.19149	2.0228	1.73402	1.58327
	18610	2.23052	2.07187	1.91932	1.40497		18610	2.1987	1.41256	1.90028	2.01549		18610	2.20788	1.63374	2.01504	1.73781		18610	2.20056	2.0331	1.71881	1.61154
	18620	2.22982	2.06994	1.89865	1.43343		18620	2.19525	1.41486	1.90403	2.00277		18620	2.21436	1.63911	2.01851	1.74519		18620	2.1961	2.02591	1.71586	1.61159
	18630	2.23123	2.07244	1.90646	1.42377		18630	2.1994	1.41947	1.90152	2.01098		18630	2.2011	1.64415	2.00099	1.72699		18630	2.19231	2.0276	1.7053	1.61034
	18640	2.2286	2.07107	1.91545	1.40536		18640	2.20365	1.41987	1.90798	2.01388		18640	2.20292	1.64523	2.0007	1.73093		18640	2.19613	2.0348	1.7142	1.60221
	18650	2.22821	2.06723	1.91754	1.40694		18650	2.21286	1.39542	1.93445	2.02588		18650	2.21495	1.64301	2.01338	1.74897		18650	2.18395	2.01762	1.70346	1.60209
	18660	2.23174	2.06852	1.90531	1.43259		18660	2.21921	1.38035	1.93983	2.04488		18660	2.19948	1.6433	1.9936	1.7322		18660	2.193	2.02471	1.72122	1.59889
	18670	2.24025	2.07801	1.91656	1.4304		18670	2.21668	1.38232	1.936	2.04167		18670	2.20178	1.62023	2.00715	1.74411		18670	2.18569	2.02313	1.70947	1.59345
	18680	2.22611	2.06155	1.9035	1.42752		18680	2.22502	1.40365	1.93544	2.04579		18680	2.209	1.61819	2.02336	1.74552		18680	2.19783	2.0495	1.70223	1.6009
	18690	2.22469	2.0605	1.8958	1.43484		18690	2.21806	1.41402	1.93029	2.02834		18690	2.21525	1.61842	2.02882	1.75478		18690	2.19356	2.04734	1.70341	1.59066
	18700	2.23416	2.06806	1.91072	1.43361		18700	2.20922	1.4068	1.93038	2.01392		18700	2.20961	1.60202	2.02259	1.76279		18700	2.17751	2.03599	1.69825	1.56644
	18710	2.22331	2.06123	1.89537	1.43007		18710	2.21192	1.41076	1.93042	2.01701		18710	2.20562	1.59004	2.02533	1.7605		18710	2.19312	2.05906	1.70527	1.57221
	18720	2.2327	2.06895	1.89112	1.45361		18720	2.20631	1.43357	1.91922	1.99927		18720	2.20359	1.60193	2.02127	1.74927		18720	2.17708	2.04083	1.69057	1.56728
	18730	2.2328	2.0705	1.88916	1.45426		18730	2.20629	1.42013	1.92534	2.00293		18730	2.20917	1.60244	2.03691	1.74473		18730	2.19728	2.06431	1.71079	1.57096
	18740	2.22679	2.0647	1.89023	1.44266		18740	2.22028	1.42684	1.94349	2.01153		18740	2.19528	1.61539	2.01051	1.72826		18740	2.19048	2.05653	1.71397	1.55865
	18750	2.22885	2.06838	1.90949	1.41816		18750	2.22139	1.41981	1.94847	2.01414		18750	2.20579	1.61568	2.03019	1.73176		18750	2.18537	2.05249	1.71817	1.54495
	18760	2.22437	2.06014	1.91853	1.4038		18760	2.21277	1.40689	1.94196	2.01051		18760	2.20201	1.60605	2.02769	1.73401		18760	2.18884	2.05647	1.72173	1.54552
	18770	2.23572	2.07179	1.93313	1.40272		18770	2.22646	1.41082	1.96102	2.01947		18770	2.20409	1.60369	2.02897	1.73996		18770	2.19687	2.05618	1.73234	1.55679
	18780	2.23635	2.07345	1.93889	1.39427		18780	2.22291	1.42039	1.95942	2.00644		18780	2.21835	1.6078	2.04091	1.75837		18780	2.19205	2.04243	1.7284	1.56565
	18790	2.23495	2.06363	1.94763	1.39217		18790	2.21278	1.39924	1.94702	2.01097		18790	2.21092	1.59456	2.02598	1.76892		18790	2.18772	2.03937	1.74372	1.54035
	18800	2.22926	2.05771	1.94583	1.3852		18800	2.21342	1.42455	1.94927	1.99236		18800	2.20419	1.59973	2.00376	1.77277		18800	2.19449	2.04533	1.75621	1.5375
	18810	2.23368	2.06202	1.95729	1.37685		18810	2.21149	1.44013	1.94058	1.98532		18810	2.20521	1.59822	1.99927	1.78171		18810	2.18864	2.04254	1.76422	1.51519
	18820	2.24367	2.0752	1.96627	1.37677		18820	2.21315	1.45469	1.94094	1.97806		18820	2.20337	1.61001	2.00648	1.75829		18820	2.20081	2.05999	1.78123	1.50691
	18830	2.22198	2.04839	1.95338	1.36484		18830	2.22276	1.46204	1.94737	1.98784		18830	2.21173	1.61851	2.0162	1.76036		18830	2.19601	2.05264	1.76703	1.51961
	18840	2.23255	2.05948	1.93966	1.40174		18840	2.21836	1.44259	1.95218	1.9875		18840	2.21284	1.64936	2.01706	1.73333		18840	2.1948	2.05472	1.78267	1.49482
	18850	2.22921	2.05402	1.93592	1.40425		18850	2.21487	1.44774	1.94407	1.98393		18850	2.22581	1.66653	2.02842	1.73686		18850	2.19448	2.05504	1.78065	1.49584
	18860	2.21433	2.03557	1.92074	1.40487		18860	2.21893	1.44434	1.94814	1.99148		18860	2.21041	1.65026	2.01298	1.73101		18860	2.18461	2.04698	1.79456	1.461
	18870	2.22562	2.04592	1.92961	1.41338		18870	2.22251	1.41845	1.96088	2.0055		18870	2.21366	1.65143	2.0011	1.75184		18870	2.20101	2.05971	1.80522	1.47908
	18880	2.22652	2.04513	1.94408	1.39742		18880	2.22506	1.43276	1.95794	2.00386		18880	2.2114	1.63327	2.00349	1.76041		18880	2.19639	2.05087	1.80019	1.48373
	18890	2.22151	2.03946	1.95339	1.37663		18890	2.22859	1.43612	1.96083	2.00647		18890	2.21346	1.63314	1.99735	1.77265		18890	2.19783	2.04461	1.82402	1.46747
	18900	2.2267	2.04733	1.95779	1.37547		18900	2.23809	1.46876	1.9609	2.00392		18900	2.22185	1.63353	2.0027	1.7872		18900	2.20519	2.05474	1.85021	1.44241
	18910	2.22939	2.04765	1.96629	1.37156		18910	2.2261	1.44831	1.95766	1.99523		18910	2.20674	1.61552	1.99113	1.77903		18910	2.20315	2.04544	1.85207	1.44697
	18920	2.22029	2.04194	1.95563	1.36579		18920	2.22344	1.4514	1.95062	1.99396		18920	2.20962	1.61267	2.00077	1.77792		18920	2.20122	2.03721	1.851	1.45407
	18930	2.21209	2.03115	1.94702	1.36755		18930	2.23934	1.46664	1.96572	2.00355		18930	2.20875	1.60074	1.99647	1.79133		18930	2.19249	2.04002	1.85242	1.42157
	18940	2.22085	2.04001	1.96028	1.36381		18940	2.224	1.43233	1.95977	2.00002		18940	2.21183	1.6241	1.99147	1.78346		18940	2.2023	2.04687	1.85971	1.43251
	18950	2.22518	2.04925	1.95356	1.37367		18950	2.22254	1.42096	1.95266	2.0118		18950	2.20448	1.61461	1.97994	1.78673		18950	2.21634	2.06652	1.86836	1.43631
	18960	2.21821	2.04346	1.93936	1.37989		18960	2.22658	1.43361	1.95866	2.00593		18960	2.20509	1.63713	1.97668	1.77127		18960	2.20064	2.0478	1.8594	1.42647
	18970	2.22794	2.05503	1.96001	1.36478		18970	2.21474	1.42936	1.94361	1.99737		18970	2.21812	1.65176	1.98529	1.78056		18970	2.19142	2.03703	1.85675	1.4169
	18980	2.22858	2.05636	1.95405	1.37339		18980	2.20716	1.426	1.92817	1.99795		18980	2.214	1.63686	1.99497	1.77324		18980	2.2012	2.05313	1.85164	1.43061
	18990	2.23092	2.05779	1.95559	1.37664		18990	2.2254	1.41775	1.95634	2.01681		18990	2.22209	1.66799	1.99953	1.75928		18990	2.20352	2.05769	1.85141	1.43151
	19000	2.22375	2.0521	1.95104	1.36839		19000	2.22029	1.44132	1.95165	1.99325		19000	2.20791	1.65954	1.97669	1.75737		19000	2.20062	2.05706	1.84416	1.43285
	19010	2.22851	2.05499	1.94697	1.38522		19010	2.22085	1.4393	1.9497	1.99785		19010	2.21948	1.67198	1.9881	1.76186		19010	2.20693	2.05216	1.8673	1.4293
	19020	2.22003	2.04554	1.95005	1.36752		19020	2.22904	1.46573	1.95433	1.99235		19020	2.21583	1.66079	1.97609	1.7767		19020	2.20917	2.04872	1.87806	1.42705
	19030	2.22665	2.05556	1.9668	1.34994		19030	2.23101	1.45442	1.95913	2.00032		19030	2.21901	1.66497	1.97343	1.78365		19030	2.20016	2.03449	1.8776	1.42017
	19040	2.231	2.06352	1.96843	1.3498		19040	2.22552	1.45882	1.94859	1.99517		19040	2.21078	1.63597	1.9725	1.79108		19040	2.21108	2.0536	1.88612	1.41528
	19050	2.22967	2.06079	1.97357	1.34201		19050	2.22494	1.44918	1.94668	2.00275		19050	2.21323	1.63948	1.98373	1.78149		19050	2.21108	2.06334	1.89239	1.39257
	19060	2.23273	2.06221	1.98554	1.33235		19060	2.21777	1.43217	1.94627	1.99949		19060	2.21301	1.65022	1.9926	1.761		19060	2.21069	2.06457	1.88962	1.39326
	19070	2.22505	2.05168	1.99066	1.31514		19070	2.22301	1.43616	1.94674	2.00779		19070	2.20992	1.65815	1.98002	1.75998		19070	2.22171	2.0706	1.89692	1.40936
	19080	2.2254	2.05146	2.00906	1.28843		19080	2.21558	1.42206	1.94752	2.00062		19080	2.21383	1.65344	1.98022	1.77398		19080	2.21127	2.06475	1.88269	1.40418
	19090	2.2267	2.05214	2.02365	1.26883		19090	2.21318	1.40481	1.93767	2.01699		19090	2.22124	1.66162	1.98972	1.77423		19090	2.21069	2.06821	1.88257	1.3974
	19100	2.22601	2.05263	2.02437	1.26445		19100	2.21362	1.4257	1.92973	2.01092		19100	2.21771	1.67664	1.97224	1.77076		19100	2.22682	2.09293	1.87238	1.42523
	19110	2.23177	2.06083	2.03301	1.25755		19110	2.22446	1.43845	1.94091	2.015		19110	2.20207	1.64714	1.96756	1.76461		19110	2.20512	2.06629	1.84704	1.42966
	19120	2.24047	2.06434	2.05715	1.24341		19120	2.20875	1.41876	1.92503	2.00961		19120	2.20715	1.66499	1.96705	1.76113		19120	2.20582	2.06295	1.84693	1.43678
	19130	2.24136	2.06292	2.06376	1.238		19130	2.21507	1.43415	1.93565	2.00238		19130	2.20444	1.65283	1.96686	1.76599		19130	2.2077	2.07076	1.84511	1.43365
	19140	2.23048	2.04811	2.05594	1.23631		19140	2.21653	1.43787	1.93305	2.00547		19140	2.20679	1.65085	1.96927	1.77101		19140	2.21382	2.08003	1.85833	1.42201
	19150	2.21682	2.03464	2.04108	1.23404		19150	2.20217	1.44578	1.90967	1.99048		19150	2.1973	1.65752	1.95701	1.75471		19150	2.21427	2.08254	1.84578	1.43599
	19160	2.2209	2.03967	2.04601	1.23224		19160	2.21123	1.43623	1.91975	2.00769		19160	2.19618	1.64849	1.94949	1.76872		19160	2.20542	2.07147	1.84416	1.42684
	19170	2.23082	2.05121	2.05059	1.24127		19170	2.19381	1.43237	1.90576	1.98546		19170	2.20548	1.6571	1.96457	1.76714		19170	2.21087	2.0781	1.84298	1.43556
	19180	2.23328	2.05962	2.04711	1.24192		19180	2.19771	1.42277	1.91027	1.9966		19180	2.20562	1.67088	1.95208	1.76834		19180	2.20537	2.07214	1.82452	1.45076
	19190	2.21643	2.04969	2.02396	1.23592		19190	2.21409	1.43735	1.92464	2.00852		19190	2.20927	1.67068	1.95372	1.77582		19190	2.21819	2.08163	1.84258	1.45343
	19200	2.21506	2.04819	2.014	1.24968		19200	2.21054	1.44773	1.92855	1.98941		19200	2.20846	1.66597	1.95539	1.77639		19200	2.204	2.06594	1.84624	1.42775
	19210	2.23254	2.07138	2.037	1.23633		19210	2.21564	1.434	1.94344	1.9962		19210	2.21184	1.67382	1.95463	1.77826		19210	2.20904	2.06842	1.85545	1.42781
	19220	2.22646	2.06368	2.03329	1.23336		19220	2.21442	1.41172	1.95482	1.99826		19220	2.20739	1.68412	1.94644	1.76642		19220	2.21266	2.066	1.85536	1.44259
	19230	2.21402	2.053	2.01169	1.24179		19230	2.21672	1.40551	1.95685	2.00574		19230	2.2036	1.68795	1.93826	1.76229		19230	2.21391	2.0699	1.86571	1.42739
	19240	2.21652	2.05335	2.0155	1.24396		19240	2.21766	1.40912	1.95635	2.00577		19240	2.21129	1.69503	1.92737	1.78654		19240	2.20779	2.06411	1.85353	1.43266
	19250	2.22032	2.05767	2.01771	1.24679		19250	2.19633	1.39812	1.93641	1.98578		19250	2.20543	1.71012	1.91132	1.77488		19250	2.2085	2.07113	1.85499	1.4228
	19260	2.22713	2.06241	2.01995	1.25957		19260	2.20264	1.37868	1.94708	2.00284		19260	2.1958	1.68288	1.90261	1.78635		19260	2.20887	2.07608	1.84411	1.43088
	19270	2.23061	2.0658	2.0189	1.26797		19270	2.20239	1.37644	1.95613	1.995		19270	2.20275	1.68563	1.90609	1.79713		19270	2.20943	2.08153	1.83214	1.44001
	19280	2.22734	2.05772	2.01382	1.27764		19280	2.20581	1.35122	1.96263	2.01333		19280	2.21506	1.70545	1.9026	1.81232		19280	2.20238	2.07311	1.8239	1.44102
	19290	2.23698	2.06645	2.02788	1.27502		19290	2.19982	1.35997	1.95542	2.00129		19290	2.211	1.70673	1.90086	1.80301		19290	2.21005	2.07932	1.84212	1.43238
	19300	2.23417	2.06745	2.02479	1.26842		19300	2.20259	1.35185	1.9621	2.00637		19300	2.20816	1.6795	1.90104	1.82134		19300	2.21754	2.0813	1.85322	1.43832
	19310	2.23389	2.06855	2.0157	1.28007		19310	2.2001	1.34914	1.95704	2.00767		19310	2.20304	1.71103	1.88362	1.79754		19310	2.20863	2.07756	1.84078	1.43225
	19320	2.23217	2.06526	2.00806	1.29134		19320	2.20613	1.36032	1.9546	2.01571		19320	2.20554	1.72139	1.87673	1.80097		19320	2.20254	2.06908	1.83655	1.43123
	19330	2.23129	2.0669	2.0248	1.25913		19330	2.20111	1.36089	1.95698	2.00199		19330	2.20173	1.71168	1.8742	1.80354		19330	2.20617	2.07747	1.83704	1.42963
	19340	2.22486	2.05932	2.01342	1.26703		19340	2.20076	1.37125	1.95339	1.99766		19340	2.20063	1.69665	1.8868	1.80192		19340	2.214	2.08991	1.85632	1.41067
	19350	2.24197	2.07696	2.02321	1.28285		19350	2.20682	1.38861	1.95045	2.00188		19350	2.19706	1.68871	1.87935	1.80844		19350	2.2126	2.08567	1.88198	1.37816
	19360	2.2277	2.06213	2.00781	1.28128		19360	2.20377	1.39698	1.94089	1.99866		19360	2.21292	1.70767	1.89467	1.81332		19360	2.20513	2.07622	1.87023	1.38447
	19370	2.22583	2.05822	2.00597	1.28392		19370	2.20477	1.42894	1.93863	1.98036		19370	2.20733	1.70409	1.88701	1.81105		19370	2.21104	2.08289	1.88772	1.36948
	19380	2.22561	2.06556	1.99704	1.28531		19380	2.21495	1.41246	1.95237	2.0013		19380	2.20725	1.70224	1.88937	1.81013		19380	2.21041	2.08494	1.87154	1.38642
	19390	2.21794	2.06148	1.98489	1.28415		19390	2.20572	1.41302	1.94224	1.99033		19390	2.20268	1.7085	1.88622	1.79633		19390	2.21211	2.08748	1.86886	1.39165
	19400	2.22846	2.07324	1.99735	1.28229		19400	2.19449	1.37883	1.94514	1.98666		19400	2.21769	1.72042	1.89717	1.81031		19400	2.21943	2.09711	1.86988	1.39909
	19410	2.21719	2.06389	1.97664	1.29038		19410	2.19734	1.3837	1.94565	1.98907		19410	2.19907	1.68714	1.88648	1.80738		19410	2.21396	2.09235	1.86967	1.38912
	19420	2.22071	2.06961	1.97833	1.29075		19420	2.19352	1.42125	1.93504	1.96438		19420	2.21187	1.68901	1.90701	1.8153		19420	2.2028	2.08145	1.86765	1.37262
	19430	2.21933	2.06712	1.97943	1.28829		19430	2.19045	1.41437	1.93158	1.96588		19430	2.21178	1.6938	1.90451	1.81322		19430	2.20127	2.07356	1.87351	1.37168
	19440	2.22884	2.08072	1.98907	1.28438		19440	2.19443	1.43251	1.93467	1.95856		19440	2.19446	1.67567	1.88902	1.80418		19440	2.20487	2.08438	1.8754	1.36423
	19450	2.21995	2.06789	1.97229	1.30011		19450	2.19703	1.43353	1.93179	1.96649		19450	2.19615	1.6935	1.88452	1.79633		19450	2.21171	2.09279	1.88211	1.36425
	19460	2.23538	2.08938	1.97921	1.30806		19460	2.20007	1.41928	1.93865	1.97684		19460	2.20928	1.68715	1.90389	1.814		19460	2.2044	2.08453	1.87662	1.3608
	19470	2.22569	2.07906	1.96555	1.31206		19470	2.20933	1.40691	1.95065	1.99446		19470	2.21411	1.68801	1.91017	1.81835		19470	2.20181	2.08217	1.88492	1.34445
	19480	2.22736	2.08003	1.95736	1.32832		19480	2.19375	1.38843	1.94093	1.98246		19480	2.20591	1.67766	1.91176	1.80629		19480	2.20612	2.0837	1.88659	1.35386
	19490	2.22304	2.07892	1.95167	1.32399		19490	2.20814	1.3843	1.9627	1.99582		19490	2.20451	1.67481	1.91255	1.80468		19490	2.20171	2.07778	1.88179	1.35526
	19500	2.2265	2.08217	1.95269	1.32895		19500	2.21068	1.3838	1.96672	1.99782		19500	2.20594	1.65297	1.92715	1.81277		19500	2.21344	2.09214	1.8985	1.34808
	19510	2.22981	2.08645	1.9603	1.32214		19510	2.20414	1.38241	1.95414	1.9967		19510	2.22347	1.66221	1.93936	1.83399		19510	2.20239	2.08119	1.88093	1.35344
	19520	2.22797	2.08596	1.9525	1.32824		19520	2.19588	1.39094	1.94439	1.98203		19520	2.21566	1.67144	1.92661	1.82009		19520	2.20097	2.07411	1.88041	1.3604
	19530	2.24233	2.09775	1.96186	1.34413		19530	2.20366	1.38474	1.956	1.99218		19530	2.22423	1.66826	1.94171	1.82786		19530	2.19939	2.06655	1.86558	1.38694
	19540	2.22473	2.07954	1.94155	1.34341		19540	2.21226	1.39778	1.96273	1.99551		19540	2.22217	1.66628	1.93482	1.83196		19540	2.2018	2.06995	1.87509	1.37667
	19550	2.22525	2.07936	1.94334	1.34283		19550	2.223	1.39912	1.98023	2.00115		19550	2.21386	1.65858	1.93077	1.82307		19550	2.19481	2.06685	1.86758	1.36917
	19560	2.21439	2.06834	1.92066	1.3565		19560	2.20848	1.39635	1.96225	1.98861		19560	2.21529	1.6413	1.95412	1.8173		19560	2.19714	2.06752	1.86154	1.38379
	19570	2.2221	2.07675	1.92446	1.36344		19570	2.21553	1.39883	1.97583	1.9891		19570	2.21001	1.65989	1.94764	1.79436		19570	2.18933	2.05262	1.87464	1.36338
	19580	2.22203	2.08423	1.91923	1.35919		19580	2.21303	1.39724	1.97433	1.98612		19580	2.21568	1.66938	1.95086	1.79604		19580	2.18218	2.04566	1.87655	1.34821
	19590	2.22241	2.08302	1.92544	1.35348		19590	2.20474	1.37714	1.96302	1.99293		19590	2.20766	1.67037	1.95113	1.77497		19590	2.18771	2.05343	1.87959	1.35008
	19600	2.21724	2.07518	1.92463	1.34972		19600	2.20388	1.36984	1.96798	1.99118		19600	2.21736	1.69346	1.94801	1.78069		19600	2.2032	2.06478	1.90592	1.34625
	19610	2.22863	2.08658	1.93445	1.35562		19610	2.21012	1.35415	1.9748	2.0089		19610	2.21614	1.69554	1.94743	1.77629		19610	2.18758	2.05716	1.89578	1.32103
	19620	2.21782	2.0751	1.91568	1.36441		19620	2.18726	1.35551	1.95245	1.97958		19620	2.21571	1.70176	1.95594	1.75985		19620	2.20092	2.07279	1.91144	1.31836
	19630	2.22144	2.07777	1.91612	1.37146		19630	2.19498	1.37743	1.96408	1.97		19630	2.22335	1.71295	1.95904	1.7648		19630	2.20458	2.0813	1.90266	1.32983
	19640	2.22	2.08162	1.90856	1.37151		19640	2.20797	1.36739	1.9705	1.99941		19640	2.21973	1.70719	1.95758	1.7629		19640	2.20852	2.08745	1.91044	1.32207
	19650	2.22625	2.08808	1.90736	1.38359		19650	2.21135	1.37146	1.97481	1.99985		19650	2.22145	1.70504	1.95893	1.7678		19650	2.20565	2.08181	1.90318	1.33183
	19660	2.22524	2.09038	1.91949	1.35987		19660	2.20332	1.35049	1.96804	2.00305		19660	2.22895	1.69511	1.96515	1.78918		19660	2.2089	2.08982	1.9069	1.32472
	19670	2.22479	2.09246	1.91298	1.36437		19670	2.20291	1.36252	1.96107	2.00084		19670	2.22232	1.68014	1.96019	1.79226		19670	2.19708	2.07735	1.87947	1.34408
	19680	2.23219	2.1025	1.91851	1.36534		19680	2.21042	1.37726	1.9722	1.99637		19680	2.21303	1.65518	1.96205	1.79045		19680	2.19851	2.07755	1.88183	1.34515
	19690	2.22643	2.09579	1.89619	1.38785		19690	2.19533	1.38767	1.95317	1.97445		19690	2.22659	1.68354	1.96785	1.79127		19690	2.20327	2.08112	1.91161	1.31282
	19700	2.22988	2.09755	1.89486	1.39805		19700	2.20685	1.37543	1.97108	1.99084		19700	2.21986	1.68186	1.96574	1.77841		19700	2.20118	2.07759	1.91355	1.30858
	19710	2.22421	2.09151	1.87905	1.41031		19710	2.20992	1.36778	1.97406	1.99994		19710	2.21314	1.67997	1.95161	1.77902		19710	2.20074	2.08077	1.90836	1.30962
	19720	2.22183	2.08545	1.89168	1.39481		19720	2.2207	1.35828	1.98678	2.01761		19720	2.22305	1.67341	1.95511	1.80586		19720	2.20084	2.08453	1.91586	1.29292
	19730	2.22476	2.0879	1.91743	1.36501		19730	2.20641	1.35533	1.97529	1.99946		19730	2.20587	1.6791	1.9269	1.78868		19730	2.19068	2.07156	1.91254	1.28414
	19740	2.23178	2.09471	1.91965	1.37435		19740	2.21007	1.3544	1.97678	2.00668		19740	2.21064	1.66836	1.93704	1.79953		19740	2.19547	2.07648	1.92332	1.27642
	19750	2.22224	2.08316	1.92182	1.35786		19750	2.21666	1.37264	1.98371	2.00198		19750	2.21028	1.64201	1.94477	1.81449		19750	2.19882	2.08282	1.91222	1.29416
	19760	2.21667	2.0779	1.9066	1.36911		19760	2.21491	1.37897	1.97701	2.00039		19760	2.21528	1.65578	1.94637	1.81245		19760	2.20268	2.08414	1.92829	1.28125
	19770	2.20639	2.06511	1.9016	1.3622		19770	2.21816	1.39667	1.98001	1.99231		19770	2.21747	1.66344	1.95604	1.80035		19770	2.19578	2.07572	1.91141	1.29647
	19780	2.20951	2.06538	1.90016	1.37384		19780	2.21285	1.40152	1.97598	1.98108		19780	2.21598	1.66631	1.95149	1.79895		19780	2.20552	2.08274	1.92643	1.29606
	19790	2.21372	2.07093	1.89113	1.39141		19790	2.20199	1.38763	1.96828	1.97431		19790	2.20807	1.66388	1.94258	1.79136		19790	2.21658	2.09037	1.94796	1.28929
	19800	2.23422	2.09513	1.90643	1.3998		19800	2.20827	1.3796	1.97815	1.98407		19800	2.21887	1.69181	1.94145	1.79313		19800	2.19902	2.07565	1.92991	1.28003
	19810	2.22515	2.08307	1.91075	1.38292		19810	2.20487	1.38957	1.97422	1.97345		19810	2.21114	1.70186	1.94252	1.76311		19810	2.21411	2.09619	1.95196	1.26507
	19820	2.22005	2.0816	1.90875	1.37142		19820	2.20526	1.39268	1.97575	1.97057		19820	2.21189	1.70165	1.92508	1.7842		19820	2.20973	2.09643	1.93787	1.27099
	19830	2.2187	2.07558	1.91306	1.37019		19830	2.20464	1.37571	1.97175	1.98507		19830	2.20816	1.7163	1.9127	1.77421		19830	2.21221	2.10129	1.96038	1.23661
	19840	2.21386	2.07326	1.91962	1.34871		19840	2.18794	1.37794	1.95501	1.963		19840	2.20995	1.7211	1.89102	1.7971		19840	2.2028	2.08979	1.94736	1.24307
	19850	2.23382	2.09156	1.93656	1.36202		19850	2.20238	1.38717	1.96714	1.97663		19850	2.20034	1.72358	1.8711	1.792		19850	2.20339	2.09058	1.95924	1.22503
	19860	2.24412	2.10825	1.94453	1.35876		19860	2.22016	1.41253	1.98279	1.9828		19860	2.20446	1.73125	1.87931	1.78614		19860	2.20321	2.08917	1.96276	1.22117
	19870	2.2339	2.09476	1.94587	1.34393		19870	2.20829	1.39894	1.97744	1.97124		19870	2.21377	1.74224	1.88951	1.78772		19870	2.20776	2.09357	1.95795	1.23769
	19880	2.23374	2.09468	1.94502	1.34477		19880	2.20669	1.41173	1.97038	1.9656		19880	2.20535	1.71853	1.89377	1.78533		19880	2.20118	2.08498	1.95511	1.23322
	19890	2.23019	2.0934	1.94024	1.34188		19890	2.20367	1.426	1.96352	1.95537		19890	2.21855	1.74077	1.89268	1.79761		19890	2.2031	2.08428	1.95399	1.243
	19900	2.22595	2.08845	1.94099	1.3344		19900	2.19682	1.42287	1.96089	1.94483		19900	2.22593	1.75463	1.87851	1.81713		19900	2.214	2.09908	1.9669	1.23643
	19910	2.23219	2.09529	1.95096	1.32998		19910	2.205	1.42764	1.96854	1.95211		19910	2.20248	1.74644	1.861	1.78564		19910	2.21368	2.09643	1.95577	1.25726
	19920	2.22077	2.08744	1.92917	1.33585		19920	2.22257	1.42984	1.98595	1.97262		19920	2.21078	1.76253	1.87491	1.77575		19920	2.21262	2.09421	1.94888	1.26788
	19930	2.21903	2.08176	1.91846	1.35425		19930	2.20929	1.42474	1.97311	1.9593		19930	2.21072	1.76567	1.88982	1.75658		19930	2.19701	2.07861	1.92303	1.27871
	19940	2.22519	2.09162	1.92534	1.34948		19940	2.21378	1.41712	1.9777	1.97031		19940	2.21127	1.76691	1.89407	1.75212		19940	2.19339	2.0755	1.92292	1.27144
	19950	2.2186	2.08589	1.92119	1.34257		19950	2.21186	1.40276	1.98028	1.97367		19950	2.20942	1.76802	1.87741	1.76424		19950	2.2045	2.08798	1.93592	1.26973
	19960	2.22762	2.09591	1.9243	1.35235		19960	2.21564	1.41141	1.98502	1.97123		19960	2.21823	1.77101	1.8961	1.76336		19960	2.20357	2.08702	1.92757	1.28072
	19970	2.22041	2.08693	1.91662	1.3534		19970	2.22304	1.4171	1.99261	1.97615		19970	2.20902	1.76009	1.87914	1.76929		19970	2.21693	2.09921	1.94563	1.27961
	19980	2.22552	2.08754	1.90265	1.38851		19980	2.22376	1.41054	1.9921	1.98296		19980	2.20263	1.74534	1.87379	1.77366		19980	2.21375	2.09171	1.93743	1.29325
	19990	2.25512	2.12251	1.91392	1.41527		19990	2.22209	1.41192	1.99341	1.97691		19990	2.21134	1.73893	1.8818	1.79305		19990	2.21336	2.09234	1.92805	1.30485
[truncated: 8,001 more rows]
